# Supplementary material for: Directing-group-free strategy for the iodine-mediated regioselective dichalcogenation of indolines: understanding the full catalytic cycles
Source: Royal Society of Chemistry journal article supplement (doi:10.1039/d3qo01492d), 2023-12-11

## Electronic Supplementary Information

### Directing-group-free Strategy for the Iodine-catalyzed Regioselective Dichalcogenation of Indoles, Understanding the Full Catalytic Cycles

Xiaoxiang Zhang,<sup>a</sup> Chenrui Liu,<sup>a</sup> Wenwei Pang,<sup>b</sup> Xiaoting Gu,<sup>a</sup> Wanxing Wei,<sup>a</sup> Zhuan Zhang,<sup>a</sup> Haiyan Chen<sup>b\*</sup> and Taoyuan Liang<sup>a\*</sup>

<sup>a</sup>Guangxi Key Laboratory of Electrochemical Energy Materials, Guangxi Colleges and Universities Key Laboratory of Applied Chemistry Technology and Resource Development, School of Chemistry and Chemical Engineering, Guangxi University, Nanning, Guangxi 530004, People's Republic of China.

<sup>b</sup>Medical College of Guangxi University, Nanning, Guangxi 530004, People's Republic of China.

\*E-mail: [taoyuanliang@gxu.edu.cn](mailto:taoyuanliang@gxu.edu.cn) (T.Y.L.), [czyzsu@gxu.edu.cn](mailto:czyzsu@gxu.edu.cn) (H.Y.C.).

## TABLE OF CONTENTS

|                                                               |          |
|---------------------------------------------------------------|----------|
| <b>1. General information.</b>                                | S3       |
| <b>2. Substrates preparation.</b>                             | S4-S6    |
| <b>3. Optimization of reaction conditions.</b>                | S7-S11   |
| <b>4. Typical procedure for the synthesis of 3aa and 4aa.</b> | S11      |
| <b>5. Control experiments.</b>                                | S11-S14  |
| <b>6. Synthetic utility.</b>                                  | S14-S16  |
| <b>7. Single crystal X-ray diffraction of 3aa, 4ka and 5.</b> | S16-S30  |
| <b>8. Computational Details.</b>                              | S30-S71  |
| <b>9. References.</b>                                         | S71-S72  |
| <b>10. Analytical data of the obtained compounds.</b>         | S72-S96  |
| <b>11. NMR spectra of the obtained compounds.</b>             | S97-S166 |

## MATERIALS AND METHODS

### 1. General information.

All air- and moisture-insensitive reactions were carried out under an ambient atmosphere and monitored by thin-layer chromatography (TLC). Concentration under reduced pressure was performed by rotary evaporation at 50–60 °C at an appropriate pressure. Purified compounds were further dried under vacuum ( $10^{-6}$ – $10^{-3}$  bar). Yields refer to purified and spectroscopically pure compounds, unless otherwise stated.

### Solvents

All solvents were purchased from Greagent (Shanghai Titansci incorporated company) and used without further purification and used as received.

### Chromatography

Thin layer chromatography (TLC) (Qingdao Jiyida silica gel reagent factory GF254) was performed using EMD TLC plates pre-coated with 250  $\mu$ m thickness silica gel 60 F254 plates and visualized by fluorescence quenching under UV light and I2 stain. Column chromatography was performed on silica gel (200-300 mesh).

### Spectroscopy and Instruments

NMR spectra were recorded on Bruker-400/500/600 spectrometer operating at (600 MHz, 565 MHz and 151 MHz), (500 MHz, 471 MHz and 126 MHz), (400 MHz, 376 MHz and 101 MHz), for  $^1\text{H}$ ,  $^{19}\text{F}$  and  $^{13}\text{C}$  acquisitions, respectively. Chemical shifts are reported in ppm with the solvent residual peak as the internal standard. For  $^1\text{H}$ -NMR:  $\text{CDCl}_3$ , 7.26, For  $^{13}\text{C}$ -NMR:  $\text{CDCl}_3$ , 77.16,  $^{19}\text{F}$ -NMR spectra were referenced using a unified chemical shift scale based on the  $^1\text{H}$  resonance of tetramethylsilane (1% v/v solution in the respective solvent). Data is reported as follows: s = singlet, d = doublet, t = triplet, q = quartet, quin = quintet, sext = sextet, sept = septet, m = multiplet, bs = broad singlet, coupling constants in Hz, integration.

### Instrument

All reactions were heated by metal sand bath (WATTCAS, LAB-500, <https://www.wattcas.com>).

## EXPERIMENTAL DATA

### 2. Substrates preparation.

#### (1) General Procedure for the preparation of indoline derivatives (1a-1p)<sup>1</sup>:

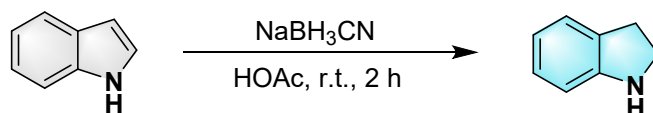

**Procedure for indoline (1f):** To a suspended solution of indole (1.33 g, 11.4 mmol) in HOAc (20.0 mL), NaBH<sub>3</sub>CN (1.89 g, 35.0 mmol) was added dropwise at 0 °C. The heterogeneous mixture was stirred for 2 h at room temperature. Quenched with saturated NH<sub>4</sub>Cl (20.0 mL), and extracted with ether (4 × 75.0 mL). The organic layers were combined, washed with brine, dried over anhydrous Na<sub>2</sub>SO<sub>4</sub> and concentrated in vacuo. The resulting oil was purified by column chromatography on silica gel (petroleum ether) afforded **1f** as a yellow oil. Similarly, the other indolines derivatives were prepared from their corresponding indoles and halides.

#### NMR Spectroscopy (1f):

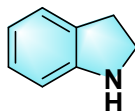

<sup>1</sup>H-NMR (600 MHz, Chloroform-*d*) δ 7.20 (d, *J* = 7.3 Hz, 1H), 7.10 (t, *J* = 7.6 Hz, 1H), 6.79 (t, *J* = 7.4 Hz, 1H), 6.72 (d, *J* = 7.8 Hz, 1H), 3.60 (q, *J* = 8.4 Hz, 3H), 3.10 (t, *J* = 8.4 Hz, 2H), known compound.

#### (2) General Procedure for the preparation of disulfide derivatives (2a-2p)<sup>2</sup>:

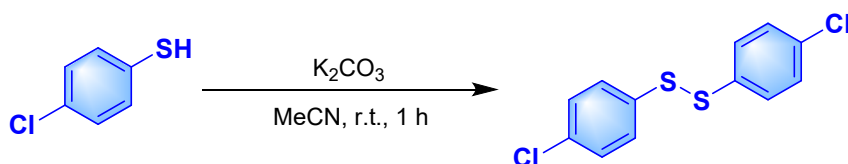

**Procedure for 1,2-bis(4-chlorophenyl)disulfane (2f):** To a round bottle (50 mL) were added 4-chlorobenzenethiol (5.0 mmol), anhydrous potassium carbonate (0.69 g, 5.0 mmol), and MeCN (10 mL) sequentially, and the reaction was conducted at room temperature under air atmosphere for 1 hour. And the desired disulfides were obtained quantitatively, after filter and concentration.

#### NMR Spectroscopy (2f):



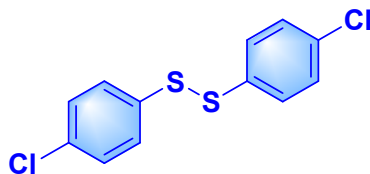

$^1\text{H-NMR}$  (600 MHz, Chloroform-*d*)  $\delta$  7.43 (d,  $J = 8.6$  Hz, 2H), 7.30 (d,  $J = 8.6$  Hz, 2H), known compound.

**(3) General Procedure for the preparation of diselenoether derivatives (2q-2v)<sup>3</sup>:**

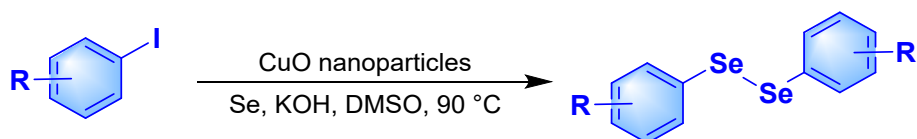

**Procedure for 1,2-diphenyldiselenane (2q):** To a stirred solution of Se metal (2.0 mmol) and iodobenzene (1.0 mmol) in dry DMSO (2.0 mL) was added CuO nanoparticles (10.0 mol%) followed by KOH (2.0 equiv) under argon atmosphere at 90 °C. The progress of the reaction was monitored by TLC. After the reaction was complete, the reaction mixture was allowed to cool to room temperature and it was then quenched with water and extracted with EtOAc. The combined organic layers were dried over anhydrous  $\text{Na}_2\text{SO}_4$ . The solvent was removed under reduced pressure, and the residue was purified by flash chromatography on a silica gel column chromatography (Pet Ether) to give the pure diselenides.

**NMR Spectroscopy (2q):**

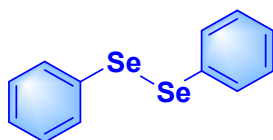

$^1\text{H-NMR}$  (600 MHz, Chloroform-*d*)  $\delta$  7.81–7.52 (m, 4H), 7.36–7.24 (m, 6H), known compound.

Scheme S1. Scope of indolines.

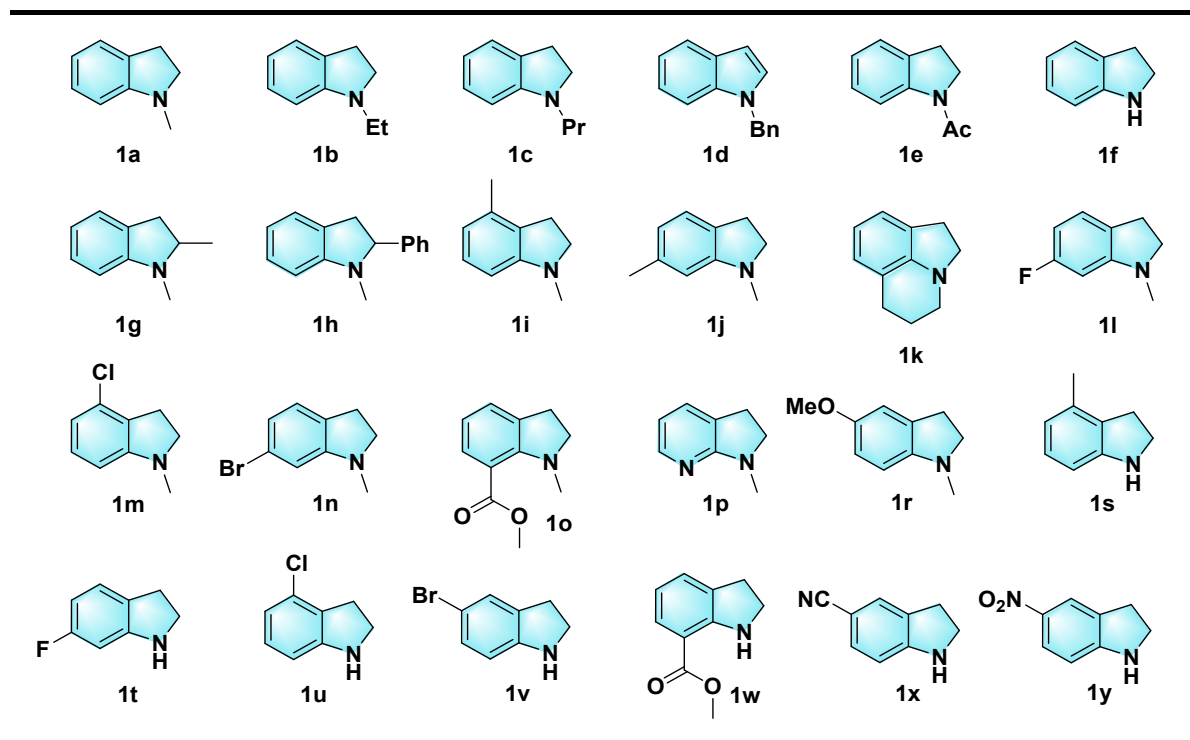

Scheme S2. Scope of dichalconides.

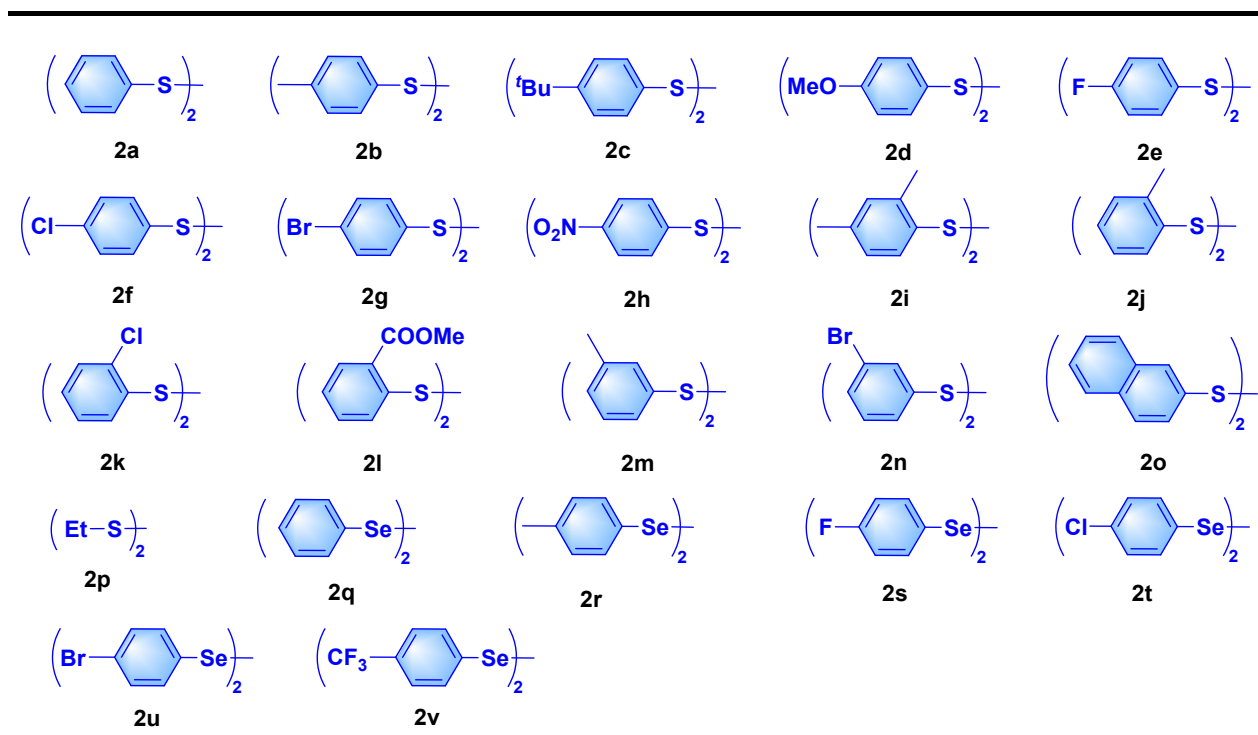

### 3. Optimization of reaction conditions.

#### 3.1. Optimization of reaction conditions A.

Table S1. Screening the solvent of reaction.<sup>a</sup>

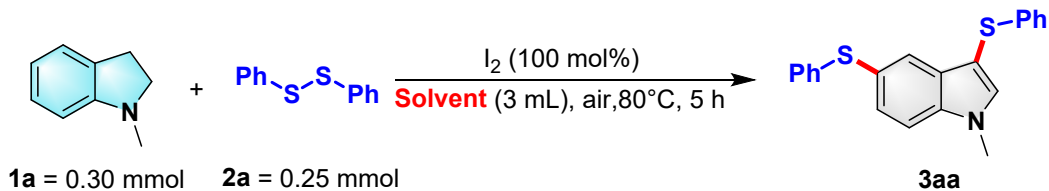

| Entry     | Solvent                       | Yield (%) <sup>b</sup> |
|-----------|-------------------------------|------------------------|
| 1         | 1,4-dioxane                   | 84                     |
| 2         | CH <sub>3</sub> CN            | 18                     |
| 3         | Toluene                       | 26                     |
| 4         | DCE                           | 44                     |
| 5         | DMF                           | trace                  |
| 6         | DMSO                          | 73                     |
| 7         | DMSO/1,4-dioxane (1/1)        | 71                     |
| 8         | DMSO/1,4-dioxane (1/2)        | 87                     |
| 9         | DMSO/1,4-dioxane (1/3)        | 79                     |
| 10        | DMSO/1,4-dioxane (1/4)        | 87                     |
| <b>11</b> | <b>DMSO/1,4-dioxane (1/5)</b> | <b>94</b>              |
| 12        | DMSO/1,4-dioxane (2/1)        | 52                     |

<sup>a</sup>Reaction conditions A, unless specified otherwise: **1a** (0.30 mmol), **2a** (0.25 mmol) and I<sub>2</sub> (100 mol%), solvent (3.0 mL) were stirred at 80 °C under air for 5 h. <sup>b</sup>Isolated yield.

Table S2. Screening the temperature of reaction.<sup>a</sup>

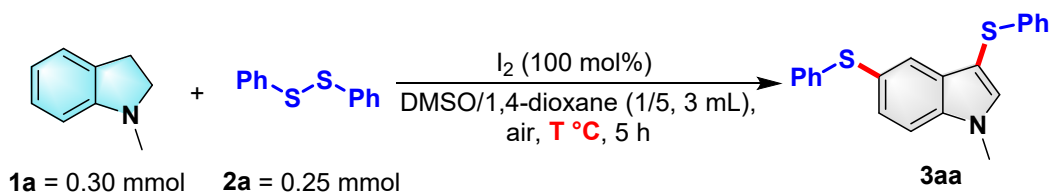

| Entry | T [°C]    | Yield (%) <sup>b</sup> |
|-------|-----------|------------------------|
| 1     | 60        | 39                     |
| 2     | <b>80</b> | <b>94</b>              |
| 3     | 100       | 55                     |

<sup>a</sup>Reaction conditions A, unless specified otherwise: **1a** (0.30 mmol), **2a** (0.25 mmol) and I<sub>2</sub> (100 mol%), DMSO/1,4-dioxane (1/5, 3.0 mL) were stirred at T °C under air for 5 h. <sup>b</sup>Isolated yield.

**Table S3. Screening the amount of I<sub>2</sub>.<sup>a</sup>**

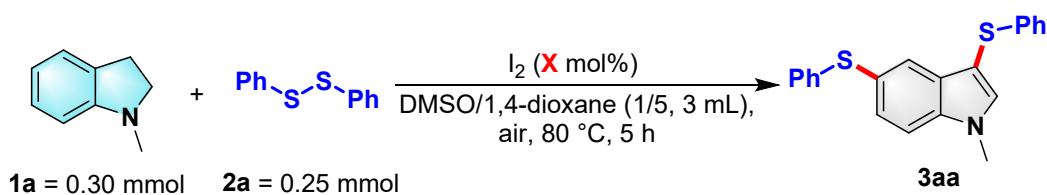

| Entry | X (mol %)  | Yield (%) <sup>b</sup> |
|-------|------------|------------------------|
| 1     | 50         | 47                     |
| 2     | 80         | 75                     |
| 3     | <b>100</b> | <b>94</b>              |
| 4     | 120        | 88                     |
| 5     | 150        | 86                     |

<sup>a</sup>Reaction conditions A, unless specified otherwise: **1a** (0.30 mmol), **2a** (0.25 mmol) and I<sub>2</sub> (**X** mol%), DMSO/1,4-dioxane (1/5, 3.0 mL) were stirred at 80 °C under air for 5 h. <sup>b</sup>Isolated yield.

**Table S4. Screening the reaction time.<sup>a</sup>**

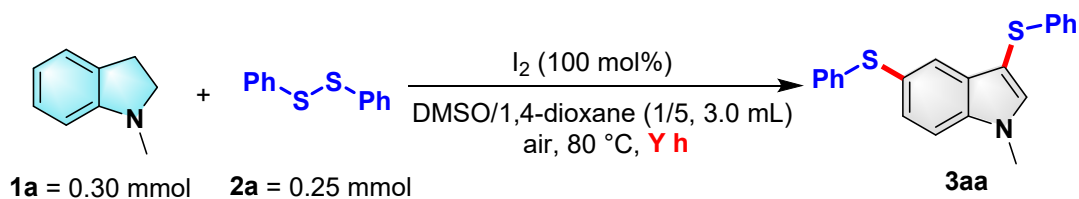

| Entry | Y (h)    | Yield (%) <sup>b</sup> |
|-------|----------|------------------------|
| 1     | 3        | 62                     |
| 2     | <b>5</b> | <b>94</b>              |
| 3     | 8        | 72                     |
| 4     | 10       | 77                     |

<sup>a</sup>Reaction conditions A, unless specified otherwise: **1a** (0.30 mmol), **2a** (0.25 mmol) and I<sub>2</sub> (100 mol%), DMSO/1,4-dioxane (1/5, 3.0 mL) were stirred at 80 °C under air for **Y** h. <sup>b</sup>Isolated yield.

**Table S5. Screening the iodized salt.<sup>a</sup>**

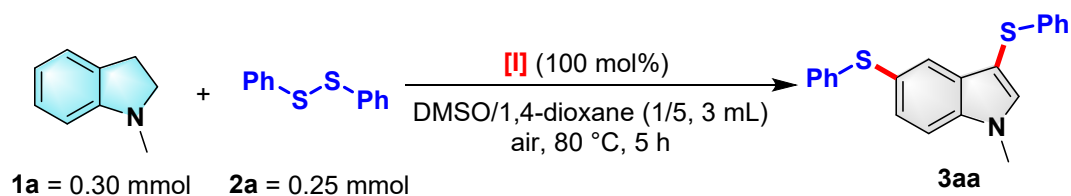

| Entry | [I] (100 mol%)    | Yield (%) <sup>b</sup> |
|-------|-------------------|------------------------|
| 1     | NaI               | 31                     |
| 2     | KI                | 26                     |
| 3     | NH <sub>4</sub> I | 45                     |

<sup>a</sup>Reaction conditions A, unless specified otherwise: **1a** (0.30 mmol), **2a** (0.25 mmol) and **[I]** (100 mol%), DMSO/1,4-dioxane (1/5, 3.0 mL) were stirred at 80 °C under air for 5 h. <sup>b</sup>Isolated yield.

### 3.2. Optimization of reaction conditions B.

**Table S6. Screening the oxidants<sup>a</sup>**

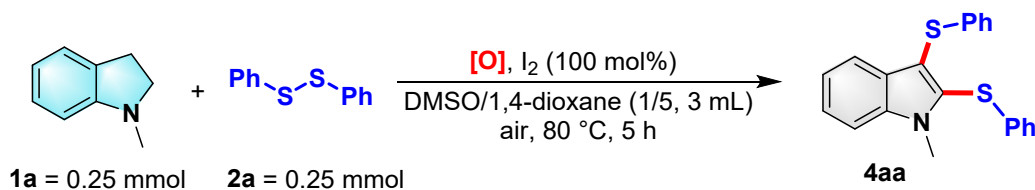

| Entry | Oxidant                                      | Yield (%) <sup>b</sup> |
|-------|----------------------------------------------|------------------------|
| 1     | K <sub>2</sub> S <sub>2</sub> O <sub>8</sub> | 12                     |
| 2     | TBHP                                         | 0                      |
| 3     | DTBP                                         | 0                      |
| 4     | <b>DDQ</b>                                   | <b>36</b>              |

<sup>a</sup>Reaction conditions B, unless specified otherwise: **1a** (0.30 mmol), **2a** (0.50 mmol), I<sub>2</sub> (100 mol%), **oxidant** (2.0 equiv.) and DMSO/1,4-dioxane (1/5, 3.0 mL) were stirred at 80 °C under air for 5 h. <sup>b</sup>Isolated yield.

**Table S7. Screening the amount of 2a.<sup>a</sup>**

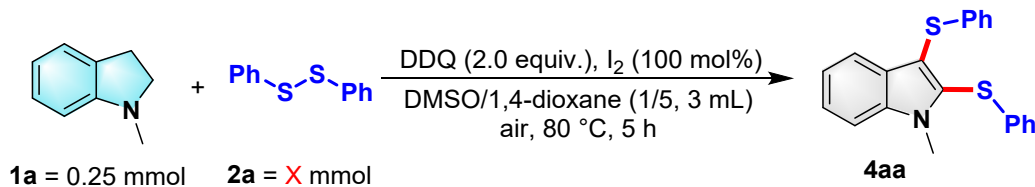

| Entry | X (mmol)   | Yield (%) <sup>b</sup> |
|-------|------------|------------------------|
| 1     | 0.30       | 43                     |
| 2     | 0.40       | 57                     |
| 3     | <b>0.5</b> | <b>64</b>              |
| 4     | 0.6        | 55                     |

<sup>a</sup>Reaction conditions B, unless specified otherwise: **1a** (0.30 mmol), **2a** (X mmol), I<sub>2</sub> (100 mol%), DDQ (2.0 equiv.) and DMSO/1,4-dioxane (1/5, 3.0 mL) were stirred at 80 °C under air for 5 h. <sup>b</sup>Isolated yield.

**Table S8. Screening the amount of I<sub>2</sub>.<sup>a</sup>**

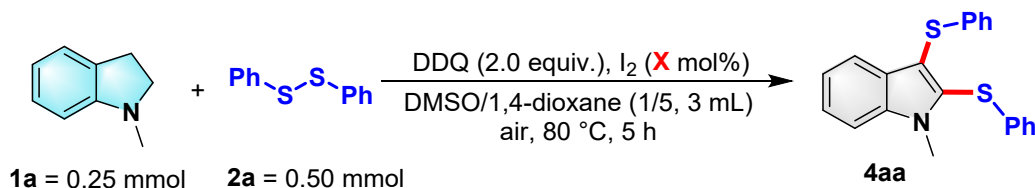

| Entry    | X (mmol)  | Yield (%) <sup>b</sup> |
|----------|-----------|------------------------|
| 1        | 80        | 60                     |
| 2        | 50        | 59                     |
| <b>3</b> | <b>30</b> | <b>62</b>              |
| 4        | 20        | 54                     |

<sup>a</sup>Reaction conditions B, unless specified otherwise: **1a** (0.30 mmol), **2a** (0.50 mmol), I<sub>2</sub> (**X** mol%), DDQ (2.0 equiv.) and DMSO/1,4-dioxane (1/5, 3.0 mL) were stirred at 80 °C under air for 5 h. <sup>b</sup>Isolated yield.

**Table S9. Screening the reaction time.<sup>a</sup>**

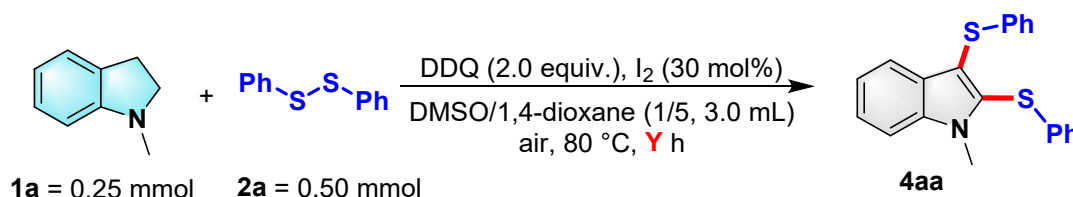

| Entry    | Y (h)     | Yield (%) <sup>b</sup> |
|----------|-----------|------------------------|
| 1        | 10        | 77                     |
| 2        | 15        | 85                     |
| <b>3</b> | <b>20</b> | <b>91</b>              |
| 4        | 24        | 88                     |

<sup>a</sup>Reaction conditions B, unless specified otherwise: **1a** (0.30 mmol), **2a** (0.50 mmol) I<sub>2</sub> (30 mol%), DDQ (2.0 equiv.) and DMSO/1,4-dioxane (1/5, 3.0 mL) were stirred at 80 °C under air for **Y** h. <sup>b</sup>Isolated yield.

## 4. Typical procedure for the synthesis of 3aa and 4aa

### (1) Typical procedure for the synthesis of 3aa:

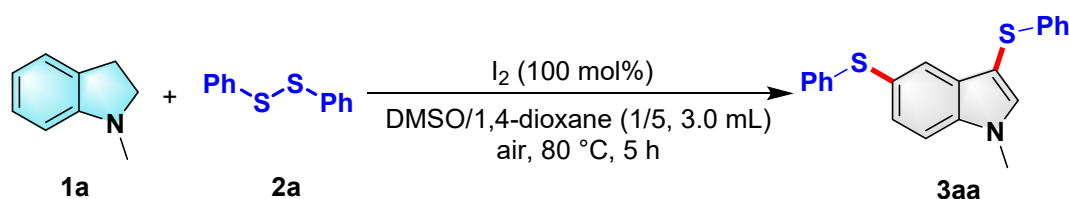

Under air atmosphere, 1-methylindoline **1a** (40.0 mg, 0.30 mmol), 1,2-diphenyldisulfane **2a** (54.5 mg, 0.25 mmol), I<sub>2</sub> (63.3 mg, 0.25 mmol), DMSO (0.5 mL) and 1,4-dioxane (2.5 mL) were added successively to a Schlenk tube (50 mL) equipped with a magnetic stirrer bar, and the resulting reaction mixture was heated at 80 °C for 5 h. After cooling to room temperature, the resulting mixture was washed with 10% Na<sub>2</sub>CO<sub>3</sub> aqueous solution, and then extracted with ethyl acetate, the combined organic layers were dried with anhydrous Na<sub>2</sub>SO<sub>4</sub>, and then concentrated by removing the solvent under vacuum. The residue was purified by column chromatography on silica gel, and eluting with petroleum ether/ethyl acetate (5/1, v/v) to give

the product **3aa** as a white solid (81.5 mg, 94% yield).

## (2) Typical procedure for the synthesis of **4aa**:

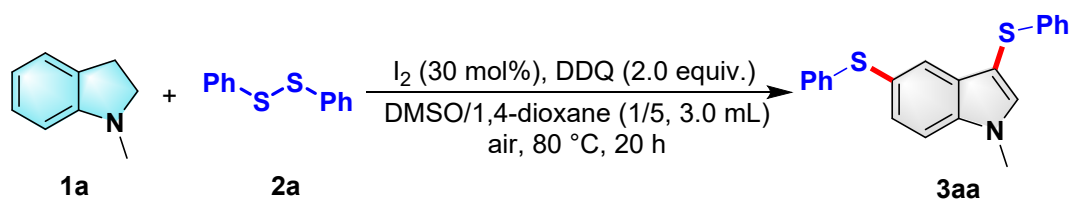

Under air atmosphere, 1-methylindoline **1a** (33.3 mg, 0.25 mmol), 1,2-diphenyldisulfane **2a** (109.0 mg, 0.50 mmol),  $I_2$  (19.0 mg, 30 mol%), DDQ (113.5 mg, 0.50 mmol), DMSO (0.5 mL) and 1,4-dioxane (2.5 mL) were added successively to a Schlenk tube (50 mL) equipped with a magnetic stirrer bar, and the resulting reaction mixture was heated at 80 °C for 20 h. After cooling to room temperature, the resulting mixture was washed with 10%  $Na_2CO_3$  aqueous solution, and then extracted with ethyl acetate, the combined organic layers were dried with anhydrous  $Na_2SO_4$ , and then concentrated by removing the solvent under vacuum. The residue was purified by column chromatography on silica gel, and eluting with petroleum ether/ethyl acetate (10/1, v/v) to give the product **4aa** as a white solid (79.4 mg, 91% yield).

## 5. Control experiments.

(1) 1-methyl-5-(phenylthio)indoline **1a-1** (60.3 mg, 0.25 mmol) and  $I_2$  (100 mol%), 1,4-dioxane/DMSO (5/1, 3.0 mL) were stirred at 80 °C under air for 5 h. The reaction mixture was purified by preparative TLC on silica eluting with petroleum ether/dichloromethane (10:1) to give product **1a-2** (44.8 mg, 75% yield).

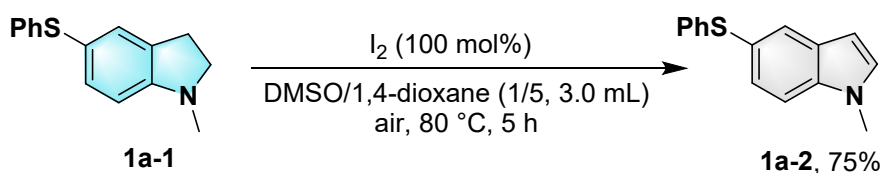

(2) Under the optimized reaction conditions A, the reaction of **1a-2** (59.7 mg, 0.25 mmol) and **2a** (27.3 mg, 0.125 mmol) were carried. Then, the reaction mixture was purified by preparative TLC on silica eluting with petroleum ether/dichloromethane (10:1) to give product **3aa** as white solid (75.5 mg, 87% yield).

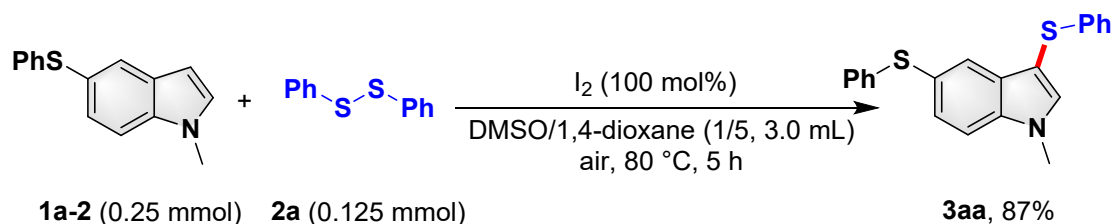

(3) 1-methylindoline **1a** (33.3 mg, 0.25 mmol) I<sub>2</sub> (30 mol%) and DDQ (113.5 mg, 0.50 mmol), 1,4-dioxane/DMSO (5/1, 3.0 mL) were stirred at 80 °C under air for 20 h. The reaction mixture was purified by preparative TLC on silica eluting with petroleum ether/dichloromethane (10:1) to give product **1a-3** (32.1 mg, 98% yield).

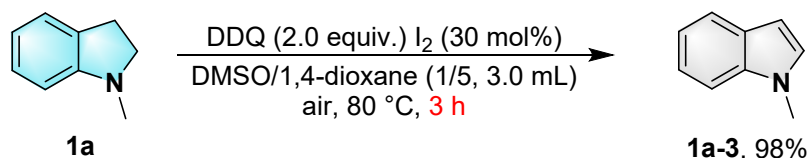

(4) Under the optimized reaction conditions B, the reaction of **1a-3** (33.3 mg, 0.25 mmol) and **2a** (109.0 mg, 0.50 mmol) were carried. Then, the crude reaction mixture was analyzed by TLC in 2 hours and 20 hours respectively. The reaction mixture (**2 h**) was purified by preparative TLC on silica eluting with petroleum ether/dichloromethane (10:1) to give product **1a-4** as white solid (28.1 mg, 47% yield) and **4aa** (trace). The reaction mixture (**20 h**) was purified by preparative TLC on silica eluting with petroleum ether/dichloromethane (10:1) to give product **4aa** as white solid (80.7 mg, 93% yield) and **1a-4** (trace).

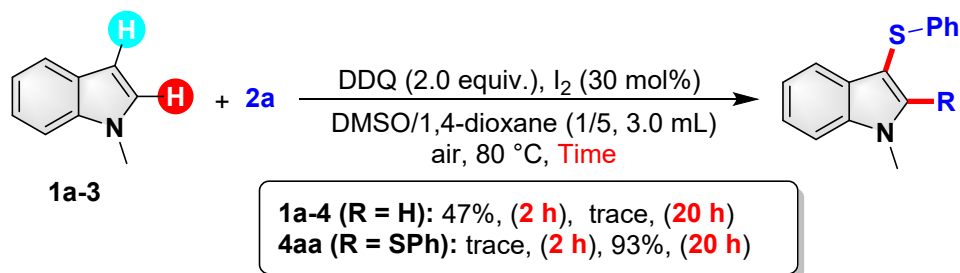

(5) **Conditions 1:** Under the optimized reaction conditions B, the reaction of **1a-3** (33.3 mg, 0.25 mmol) and 1,2-bis(4-nitrophenyl)disulfane (154.0 mg, 0.50 mmol) were carried. Then, the reaction mixture was purified by preparative TLC on silica eluting with petroleum ether/dichloromethane (10:1) to give product **4** as white solid (47.6 mg, 67% yield).

**Conditions 2:** Under the optimized reaction conditions B, the reaction of **1a-3** (33.3 mg, 0.25 mmol) and dimethyl 2,2'-disulfanediyldibenzoate (167.0 mg, 0.50 mmol) were carried. Then, the reaction mixture was purified by preparative TLC on silica eluting with petroleum ether/dichloromethane (10:1) to give product **5** as white solid (60.1 mg, 81% yield).



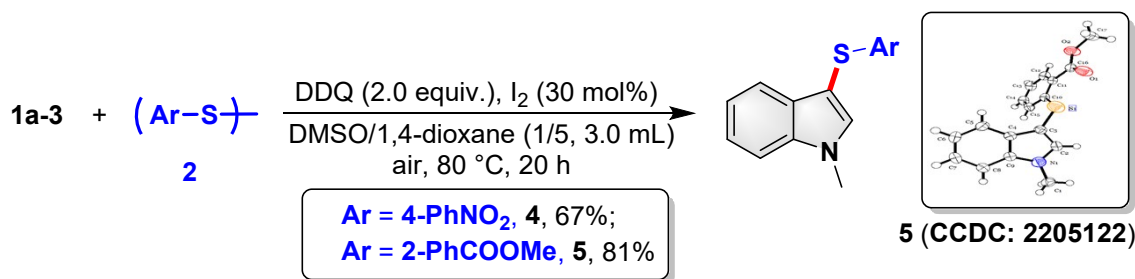

**(6) Conditions 1:** Under the standard condition A, two free radical trapping reagents, 2,2,6,6-tetramethyl-1-piperidinyloxy (**TEMPO**) and hydroxytoluene (**BHT**) was introducing to this reaction A. Then, the reaction mixture was purified by preparative TLC on silica eluting with petroleum ether/dichloromethane (10:1) to give product **3aa** as white solid (32.1 mg, 37% yield and trace products, respectively).

**Conditions 2:** Under the standard condition B, two free radical trapping reagents, 2,2,6,6-tetramethyl-1-piperidinyloxy (**TEMPO**) and hydroxytoluene (**BHT**) was introducing to this reaction B. Then, the reaction mixture was purified by preparative TLC on silica eluting with petroleum ether/dichloromethane (10:1) to give product **4aa** as white solid (10.4 mg, 21% yield and trace products, respectively).

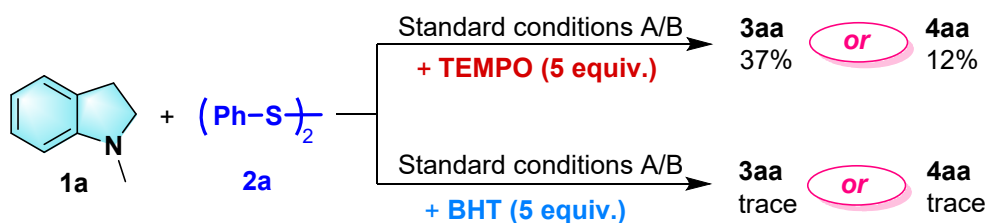

**(7)** Under the standard condition A/B, N<sub>2</sub> instead of air was used. The resulting mixture was concentrated by removing the solvent under vacuum, and the residue was purified by preparative TLC on silica gel by using petroleum ether/dichloromethane (10:1) as the eluent to give **3aa** as a white solid (78.1 mg, 90% yield) or **4aa** as a white solid (72.0 mg, 83% yield).

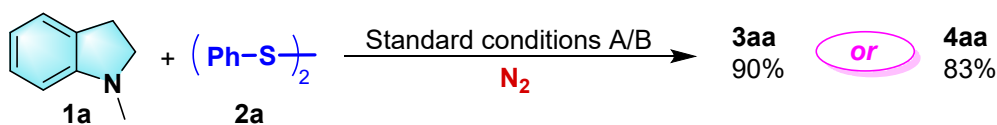

**(8)** Under the standard condition A/B of both N<sub>2</sub> atmosphere and the absence of DMSO. Then, the crude reaction mixture was analyzed by TLC, and **3aa** not observed. Another resulting mixture was concentrated by removing the solvent under vacuum, and the residue was purified by preparative TLC on silica gel by using petroleum ether/dichloromethane (10:1) as the eluent to give **4aa** as a white solid (13.9 mg, 16% yield).

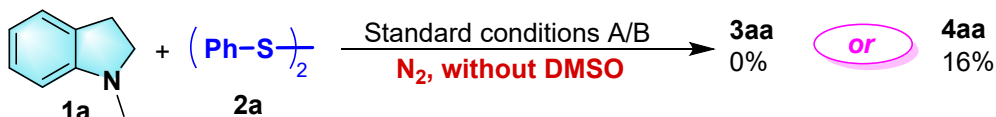

(9) Under the standard condition A/B of both N<sub>2</sub> atmosphere and the absence of DMSO, two equivalents of I<sub>2</sub> were employed in this scenario. The resulting mixture was concentrated by removing the solvent under vacuum, and the residue was purified by preparative TLC on silica gel by using petroleum ether/dichloromethane (10:1) as the eluent to give **3aa** as a white solid (77.2 mg, 89% yield) or **4aa** as a white solid (68.5 mg, 79% yield).

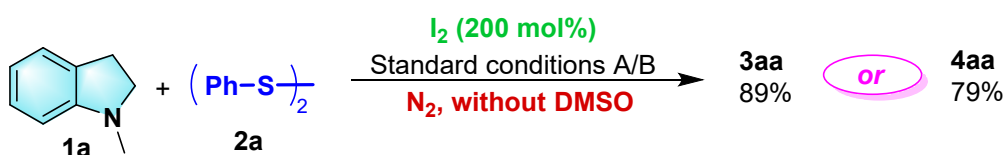

## 6. Synthetic utility.

(1) To a solution of **3aa** (86.8 mg, 0.25 mmol) in DMA (3.0 mL) was added CF<sub>3</sub>SO<sub>2</sub>Na (3.0 equiv), CuSO<sub>4</sub> (10 mol%), TBHP (5.0 equiv) under N<sub>2</sub>. After stirring at 85 °C for 1 h, the organic layer was concentrated under reduced pressure, and the residue was purified by silica gel column chromatography using ethyl acetate /petroleum (1:10) as eluent to afford the pure product **6** as a white solid (71.6 mg, 69% yield).

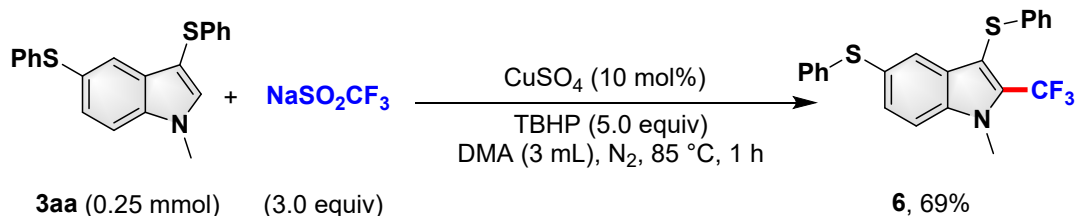

(2) To a solution of **3aa** (86.8 mg, 0.25 mmol) in MeCN (3.0 mL) was added pyrazol (3.0 equiv), I<sub>2</sub> (1.0 equiv) under O<sub>2</sub>. After stirring at 80 °C for 12 h, the organic layer was concentrated under reduced pressure, and the residue was purified by silica gel column chromatography using ethyl acetate /petroleum (1:10) as eluent to afford the pure product **7** as a white solid (43.4 mg, 42% yield).

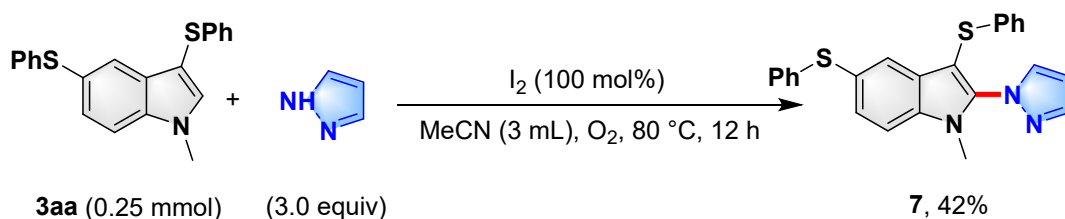

(3) To a solution of **3aa** (86.8 mg, 0.25 mmol) in DMSO/1,4-dioxane (1/5, 3.0 mL) was added 1,2-diphenyldisulfane (2.0 equiv), I<sub>2</sub> (1.0 equiv) under air. After stirring at 80 °C for 8 h, the organic layer was concentrated under reduced pressure, and the residue was purified by silica gel column chromatography using ethyl acetate /petroleum (1:10) as eluent to afford the pure product **8** as a white solid (97.8 mg, 86% yield).

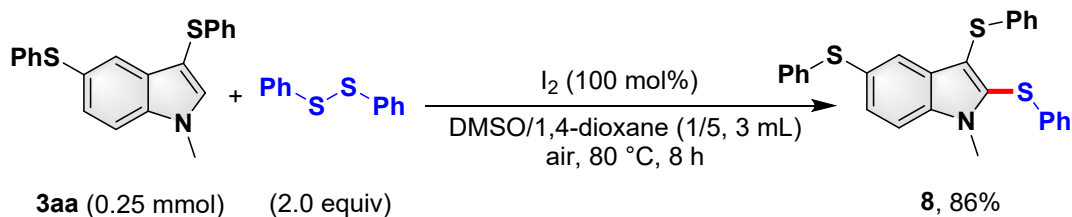

(4) To a solution of **3aa** (86.8 mg, 0.25 mmol) in DMF (2.0 mL) was added *N*-Bromosuccinimide (2.0 equiv) under air. After stirring at room temperature for 2 h, the organic layer was concentrated under reduced pressure, and the residue was purified by silica gel column chromatography using ethyl acetate /petroleum (1:10) as eluent to afford the pure product **9** as a white solid (81.6 mg, 77% yield).

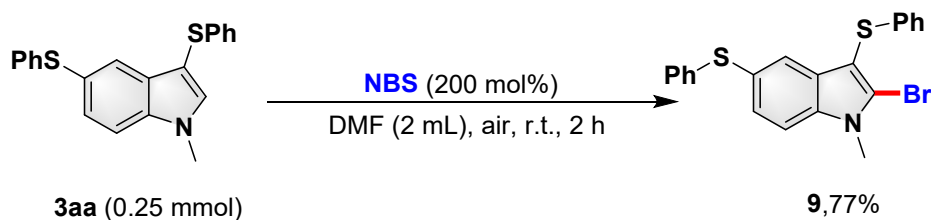

(5) To a solution of **3aa** (86.8 mg, 0.25 mmol) in DCE (3.0 mL) was added phenylboronic acid (2.0 equiv), Cu(OAc)<sub>2</sub> (1.0 equiv) and CF<sub>3</sub>COOH (1.0 equiv) under air. After stirring at 80 °C for 13 h, the organic layer was concentrated under reduced pressure, and the residue was purified by silica gel column chromatography using ethyl acetate /petroleum (1:10) as eluent to afford the pure product **10** as a white solid (45.5 mg, 43% yield).

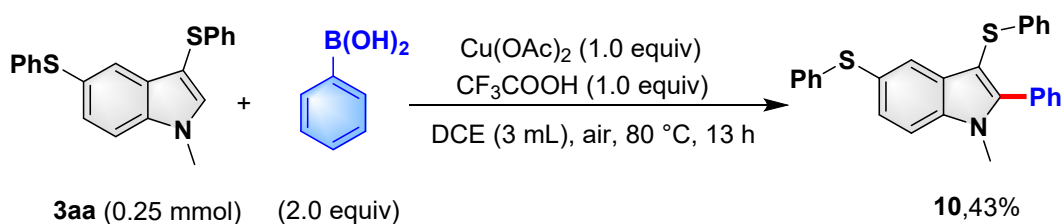

## 7. Single crystal X-ray diffraction

### (1) Single crystal X-ray diffraction of **3aa**

White block-like single crystals of **3aa** were grown by layering a dichloromethane solution with *n*-hexane at ambient temperature. X-Ray diffraction data of one these crystals were collected on a R-Axis SPIDER diffractometer. The measurements were performed with Mo-K $\alpha$  radiation ( $\lambda = 0.71073 \text{ \AA}$ ). Data were collected at 293(2) K, using the  $\omega$ - and  $\varphi$ - scans to a maximum  $\theta$  value of 25.242°. The data were refined by full-matrix least-squares techniques on F<sup>2</sup> with SHELXTL-2014. And the structures were solved by direct methods SHELXS-2014. All the non-hydrogen atoms were refined anisotropically. The hydrogen atoms were included at geometrically idealized positions. And an ORTEP representation of the structure is shown below.

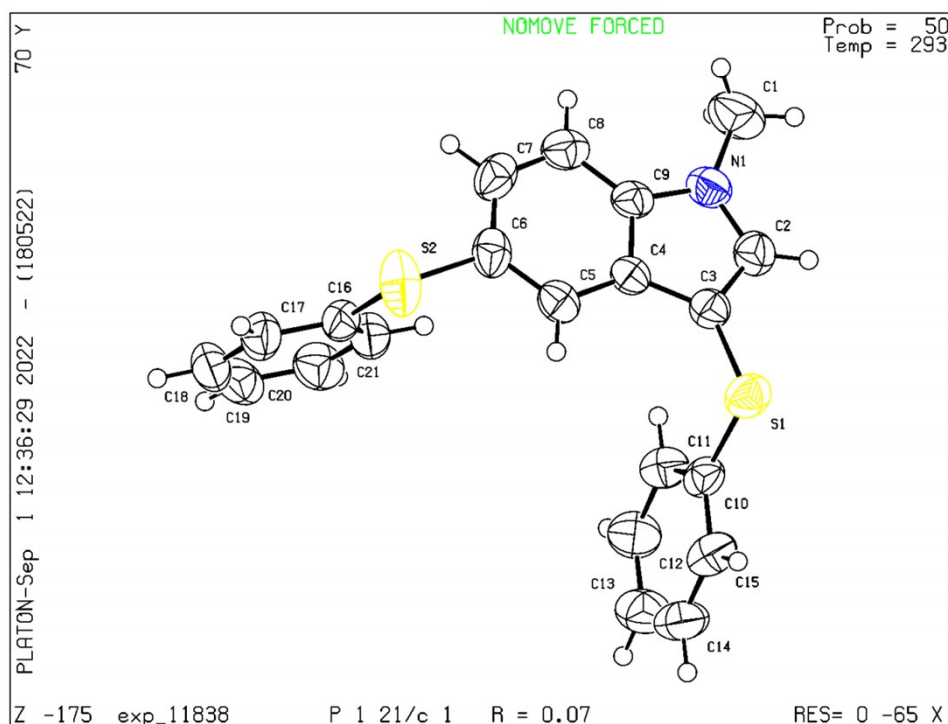

**Figure S1.** ORTEP drawing of **3aa** with the numbering scheme.

**Table S10.** Crystal data and structure refinement for **3aa**

|                      |                                                 |                               |
|----------------------|-------------------------------------------------|-------------------------------|
| Identification code  | 3aa                                             |                               |
| Empirical formula    | C <sub>21</sub> H <sub>17</sub> NS <sub>2</sub> |                               |
| Formula weight       | 347.48                                          |                               |
| Temperature          | 293(2) K                                        |                               |
| Crystal system       | Monoclinic                                      |                               |
| Space group          | P2 <sub>1</sub> /c                              |                               |
| Unit cell dimensions | a = 11.0377(12) Å                               | $\alpha = 90^\circ$ .         |
|                      | b = 20.8920(13) Å                               | $\beta = 111.387(12)^\circ$ . |
|                      | c = 8.4833(8) Å                                 | $\gamma = 90^\circ$ .         |

|                                           |                                           |
|-------------------------------------------|-------------------------------------------|
| Volume                                    | 1821.5(3) Å <sup>3</sup>                  |
| Z                                         | 4                                         |
| F(000)                                    | 728.0                                     |
| Crystal size                              | 0.20x 0.15 x 0.10 mm <sup>3</sup>         |
| 2 <sup>θ</sup> range for data collection  | 7.068 to 58.82                            |
| Index ranges                              | -13 ≤ h ≤ 14, -26 ≤ k ≤ 28, -11 ≤ l ≤ 10  |
| Reflections collected                     | 11884                                     |
| Independent reflections                   | 4287 [R(int) = 0.0344, R(sigma) = 0.0536] |
| Data / restraints / parameters            | 4287/0/219                                |
| Goodness-of-fit on F <sup>2</sup>         | 1.058                                     |
| Final R indices [I >= 2 <sup>σ</sup> (I)] | R1 = 0.0653, wR2 = 0.1079                 |
| Final R indices (all data)                | R1 = 0.1087, wR2 = 0.1244                 |
| Largest diff. peak and hole               | 0.21/-0.24 e.Å <sup>-3</sup>              |

**Table S11.** Fractional Atomic Coordinates ( $\times 10^4$ ) and Equivalent Isotropic Displacement Parameters ( $\text{Å}^2 \times 10^3$ ) for **3aa**. U(eq) is defined as 1/3 of the trace of the orthogonalised U<sup>ij</sup> tensor.

| Atom       | x         | y          | z          | U(eq)    |
|------------|-----------|------------|------------|----------|
| <b>S1</b>  | 7862.1(8) | 6547.2(3)  | 7445.6(9)  | 60.2(2)  |
| <b>S2</b>  | 9939.9(8) | 3975.7(4)  | 6164.3(12) | 76.3(3)  |
| <b>N1</b>  | 7530(2)   | 5217.9(10) | 10517(3)   | 55.6(6)  |
| <b>C9</b>  | 8085(2)   | 4845.9(11) | 9624(3)    | 45.6(6)  |
| <b>C4</b>  | 8250(2)   | 5226.2(11) | 8350(3)    | 42.3(6)  |
| <b>C3</b>  | 7763(2)   | 5847.9(11) | 8513(3)    | 47.3(6)  |
| <b>C16</b> | 8676(3)   | 3536.0(11) | 4654(3)    | 49.4(6)  |
| <b>C5</b>  | 8805(2)   | 4956.4(12) | 7269(3)    | 48.4(6)  |
| <b>C10</b> | 6699(2)   | 6441.1(11) | 5374(3)    | 48.3(6)  |
| <b>C2</b>  | 7340(3)   | 5815.6(13) | 9829(3)    | 55.4(7)  |
| <b>C11</b> | 5759(3)   | 5966.9(13) | 4925(3)    | 57.6(7)  |
| <b>C15</b> | 6734(3)   | 6874.1(13) | 4149(4)    | 62.1(8)  |
| <b>C6</b>  | 9174(3)   | 4324.4(12) | 7478(3)    | 54.9(7)  |
| <b>C17</b> | 9036(3)   | 3124.5(12) | 3627(4)    | 61.8(8)  |
| <b>C8</b>  | 8467(3)   | 4209.3(12) | 9853(3)    | 56.1(7)  |
| <b>C21</b> | 7377(3)   | 3588.4(12) | 4431(3)    | 57.2(7)  |
| <b>C7</b>  | 9010(3)   | 3956.6(12) | 8778(4)    | 61.0(8)  |
| <b>C18</b> | 8115(4)   | 2773.9(14) | 2393(4)    | 72.8(10) |
| <b>C20</b> | 6455(3)   | 3227.2(14) | 3189(4)    | 67.5(8)  |
| <b>C12</b> | 4868(3)   | 5934.6(15) | 3290(4)    | 67.9(8)  |
| <b>C14</b> | 5831(3)   | 6834.1(15) | 2519(4)    | 71.7(9)  |

|            |         |            |          |          |
|------------|---------|------------|----------|----------|
| <b>C19</b> | 6827(4) | 2820.0(14) | 2181(4)  | 74.0(9)  |
| <b>C1</b>  | 7217(4) | 5006.9(16) | 11964(4) | 82.3(10) |
| <b>C13</b> | 4895(3) | 6367.5(17) | 2088(4)  | 75.2(9)  |

**Table S12.** Anisotropic Displacement Parameters ( $\text{\AA}^2 \times 10^3$ ) for **3aa**. The Anisotropic displacement factor exponent takes the form:  $-2\pi^2[h^2a^2U_{11}+2hka*b*U_{12}+\dots]$ .

| <b>Atom</b> | <b>U<sub>11</sub></b> | <b>U<sub>22</sub></b> | <b>U<sub>33</sub></b> | <b>U<sub>23</sub></b> | <b>U<sub>13</sub></b> | <b>U<sub>12</sub></b> |
|-------------|-----------------------|-----------------------|-----------------------|-----------------------|-----------------------|-----------------------|
| <b>S1</b>   | 65.8(5)               | 47.0(4)               | 62.3(4)               | 3.3(3)                | 16.6(4)               | -5.2(3)               |
| <b>S2</b>   | 53.9(5)               | 80.0(6)               | 97.5(6)               | -39.2(5)              | 30.6(5)               | -8.2(4)               |
| <b>N1</b>   | 60.3(15)              | 64.6(14)              | 45.0(12)              | 3.8(10)               | 22.8(12)              | 1.9(12)               |
| <b>C9</b>   | 41.6(15)              | 49.6(14)              | 36.6(13)              | -0.4(11)              | 3.6(12)               | -4.9(11)              |
| <b>C4</b>   | 36.6(14)              | 47.8(14)              | 36.8(12)              | -3.4(10)              | 6.6(12)               | -3.6(11)              |
| <b>C3</b>   | 46.4(16)              | 49.2(14)              | 43.7(14)              | -0.4(11)              | 13.5(13)              | -0.3(12)              |
| <b>C16</b>  | 61.6(18)              | 39.1(13)              | 51.2(15)              | 0.2(11)               | 24.8(15)              | 0.5(12)               |
| <b>C5</b>   | 44.4(15)              | 53.9(15)              | 43.4(13)              | -6.9(11)              | 12.0(13)              | -9.7(12)              |
| <b>C10</b>  | 45.1(16)              | 47.4(14)              | 55.2(15)              | 7.6(12)               | 21.5(14)              | 11.0(12)              |
| <b>C2</b>   | 54.7(18)              | 58.3(16)              | 53.2(16)              | -2.8(13)              | 19.4(15)              | 7.2(13)               |
| <b>C11</b>  | 54.0(19)              | 61.7(17)              | 58.0(17)              | 12.7(13)              | 21.4(16)              | 3.6(14)               |
| <b>C15</b>  | 60(2)                 | 55.5(16)              | 74(2)                 | 17.2(14)              | 27.8(18)              | 8.3(14)               |
| <b>C6</b>   | 46.6(17)              | 51.2(16)              | 59.5(17)              | -16.5(13)             | 10.7(15)              | -4.2(12)              |
| <b>C17</b>  | 78(2)                 | 51.7(16)              | 68.0(19)              | -2.1(14)              | 40.5(19)              | 5.4(15)               |
| <b>C8</b>   | 57.2(19)              | 53.3(16)              | 48.4(15)              | 4.0(12)               | 8.2(15)               | -10.8(14)             |
| <b>C21</b>  | 65(2)                 | 52.2(16)              | 57.0(17)              | -7.0(13)              | 24.7(16)              | 0.2(14)               |
| <b>C7</b>   | 56.3(19)              | 41.6(14)              | 66.2(18)              | -6.0(13)              | -0.3(16)              | 0.0(13)               |
| <b>C18</b>  | 117(3)                | 53.9(17)              | 58.5(18)              | -10.8(14)             | 45(2)                 | -4.8(19)              |
| <b>C20</b>  | 67(2)                 | 70.2(19)              | 60.0(18)              | -1.9(15)              | 17.1(17)              | -10.9(16)             |
| <b>C12</b>  | 56(2)                 | 79(2)                 | 62.5(19)              | 4.6(16)               | 13.9(17)              | -2.2(16)              |
| <b>C14</b>  | 74(2)                 | 80(2)                 | 63(2)                 | 27.4(16)              | 26(2)                 | 21.4(18)              |
| <b>C19</b>  | 103(3)                | 64.7(19)              | 49.9(17)              | -8.7(14)              | 23(2)                 | -22.8(19)             |
| <b>C1</b>   | 99(3)                 | 97(2)                 | 62.4(19)              | 9.0(17)               | 44(2)                 | -7(2)                 |
| <b>C13</b>  | 65(2)                 | 96(2)                 | 56.8(18)              | 11.2(18)              | 12.2(17)              | 13.4(19)              |

**Table S13.** Bond Lengths for **3aa**.

| <b>Atom</b> | <b>Atom</b> | <b>Length/\AA</b> | <b>Atom</b> | <b>Atom</b> | <b>Length/\AA</b> |
|-------------|-------------|-------------------|-------------|-------------|-------------------|
| <b>S1</b>   | <b>C3</b>   | 1.743(2)          | <b>C5</b>   | <b>C6</b>   | 1.374(3)          |
| <b>S1</b>   | <b>C10</b>  | 1.772(3)          | <b>C10</b>  | <b>C11</b>  | 1.384(4)          |
| <b>S2</b>   | <b>C16</b>  | 1.768(3)          | <b>C10</b>  | <b>C15</b>  | 1.389(3)          |
| <b>S2</b>   | <b>C6</b>   | 1.782(3)          | <b>C11</b>  | <b>C12</b>  | 1.379(4)          |
| <b>N1</b>   | <b>C9</b>   | 1.375(3)          | <b>C15</b>  | <b>C14</b>  | 1.381(4)          |

|            |            |          |            |            |          |
|------------|------------|----------|------------|------------|----------|
| <b>N1</b>  | <b>C2</b>  | 1.362(3) | <b>C6</b>  | <b>C7</b>  | 1.408(4) |
| <b>N1</b>  | <b>C1</b>  | 1.459(3) | <b>C17</b> | <b>C18</b> | 1.375(4) |
| <b>C9</b>  | <b>C4</b>  | 1.406(3) | <b>C8</b>  | <b>C7</b>  | 1.367(4) |
| <b>C9</b>  | <b>C8</b>  | 1.387(3) | <b>C21</b> | <b>C20</b> | 1.390(4) |
| <b>C4</b>  | <b>C3</b>  | 1.431(3) | <b>C18</b> | <b>C19</b> | 1.369(4) |
| <b>C4</b>  | <b>C5</b>  | 1.395(3) | <b>C20</b> | <b>C19</b> | 1.371(4) |
| <b>C3</b>  | <b>C2</b>  | 1.360(3) | <b>C12</b> | <b>C13</b> | 1.371(4) |
| <b>C16</b> | <b>C17</b> | 1.382(3) | <b>C14</b> | <b>C13</b> | 1.369(4) |
| <b>C16</b> | <b>C21</b> | 1.381(4) |            |            |          |

**Table S14.** Bond Angles for **3aa**.

| <b>Atom</b> | <b>Atom</b> | <b>Atom</b> | <b>Angle/°</b> | <b>Atom</b> | <b>Atom</b> | <b>Atom</b> | <b>Angle/°</b> |
|-------------|-------------|-------------|----------------|-------------|-------------|-------------|----------------|
| <b>C3</b>   | <b>S1</b>   | <b>C10</b>  | 104.50(12)     | <b>C11</b>  | <b>C10</b>  | <b>C15</b>  | 118.9(3)       |
| <b>C16</b>  | <b>S2</b>   | <b>C6</b>   | 103.68(12)     | <b>C15</b>  | <b>C10</b>  | <b>S1</b>   | 116.9(2)       |
| <b>C9</b>   | <b>N1</b>   | <b>C1</b>   | 125.6(2)       | <b>C3</b>   | <b>C2</b>   | <b>N1</b>   | 110.6(2)       |
| <b>C2</b>   | <b>N1</b>   | <b>C9</b>   | 108.2(2)       | <b>C12</b>  | <b>C11</b>  | <b>C10</b>  | 120.0(2)       |
| <b>C2</b>   | <b>N1</b>   | <b>C1</b>   | 126.2(2)       | <b>C14</b>  | <b>C15</b>  | <b>C10</b>  | 120.2(3)       |
| <b>N1</b>   | <b>C9</b>   | <b>C4</b>   | 108.2(2)       | <b>C5</b>   | <b>C6</b>   | <b>S2</b>   | 119.8(2)       |
| <b>N1</b>   | <b>C9</b>   | <b>C8</b>   | 129.7(2)       | <b>C5</b>   | <b>C6</b>   | <b>C7</b>   | 120.6(2)       |
| <b>C8</b>   | <b>C9</b>   | <b>C4</b>   | 122.1(2)       | <b>C7</b>   | <b>C6</b>   | <b>S2</b>   | 119.5(2)       |
| <b>C9</b>   | <b>C4</b>   | <b>C3</b>   | 106.3(2)       | <b>C18</b>  | <b>C17</b>  | <b>C16</b>  | 120.6(3)       |
| <b>C5</b>   | <b>C4</b>   | <b>C9</b>   | 119.2(2)       | <b>C7</b>   | <b>C8</b>   | <b>C9</b>   | 117.5(2)       |
| <b>C5</b>   | <b>C4</b>   | <b>C3</b>   | 134.5(2)       | <b>C16</b>  | <b>C21</b>  | <b>C20</b>  | 119.8(3)       |
| <b>C4</b>   | <b>C3</b>   | <b>S1</b>   | 127.86(18)     | <b>C8</b>   | <b>C7</b>   | <b>C6</b>   | 121.6(2)       |
| <b>C2</b>   | <b>C3</b>   | <b>S1</b>   | 125.0(2)       | <b>C19</b>  | <b>C18</b>  | <b>C17</b>  | 120.4(3)       |
| <b>C2</b>   | <b>C3</b>   | <b>C4</b>   | 106.7(2)       | <b>C19</b>  | <b>C20</b>  | <b>C21</b>  | 120.5(3)       |
| <b>C17</b>  | <b>C16</b>  | <b>S2</b>   | 116.6(2)       | <b>C13</b>  | <b>C12</b>  | <b>C11</b>  | 121.0(3)       |
| <b>C21</b>  | <b>C16</b>  | <b>S2</b>   | 124.3(2)       | <b>C13</b>  | <b>C14</b>  | <b>C15</b>  | 120.6(3)       |
| <b>C21</b>  | <b>C16</b>  | <b>C17</b>  | 119.1(3)       | <b>C18</b>  | <b>C19</b>  | <b>C20</b>  | 119.6(3)       |
| <b>C6</b>   | <b>C5</b>   | <b>C4</b>   | 118.9(2)       | <b>C14</b>  | <b>C13</b>  | <b>C12</b>  | 119.3(3)       |
| <b>C11</b>  | <b>C10</b>  | <b>S1</b>   | 124.15(19)     |             |             |             |                |

**Table S15.** Hydrogen Atom Coordinates ( $\text{\AA} \times 10^4$ ) and Isotropic Displacement Parameters ( $\text{\AA}^2 \times 10^3$ ) for **3aa**.

| <b>Atom</b> | <b>x</b> | <b>y</b> | <b>z</b> | <b>U(eq)</b> |
|-------------|----------|----------|----------|--------------|
| <b>H5</b>   | 8924.61  | 5200.32  | 6419.97  | 58           |
| <b>H2</b>   | 6971.89  | 6154.76  | 10207.49 | 67           |
| <b>H11</b>  | 5727.44  | 5670.29  | 5727.01  | 69           |
| <b>H15</b>  | 7367.64  | 7191.9   | 4427.11  | 74           |

|            |         |         |          |     |
|------------|---------|---------|----------|-----|
| <b>H17</b> | 9909.69 | 3084.21 | 3771.82  | 74  |
| <b>H8</b>  | 8357.88 | 3963.71 | 10705.98 | 67  |
| <b>H21</b> | 7118.47 | 3864.58 | 5109.57  | 69  |
| <b>H7</b>  | 9277.74 | 3531.37 | 8907.52  | 73  |
| <b>H18</b> | 8367.34 | 2503.83 | 1696.68  | 87  |
| <b>H20</b> | 5580.65 | 3262.04 | 3041.25  | 81  |
| <b>H12</b> | 4239.54 | 5614.33 | 2996.8   | 82  |
| <b>H14</b> | 5857.75 | 7126.82 | 1706.92  | 86  |
| <b>H19</b> | 6208.21 | 2576.41 | 1358.42  | 89  |
| <b>H1A</b> | 6491.6  | 4717.6  | 11585.32 | 124 |
| <b>H1B</b> | 6996.66 | 5371.33 | 12494.75 | 124 |
| <b>H1C</b> | 7956.1  | 4792.99 | 12762.33 | 124 |
| <b>H13</b> | 4284.23 | 6344.55 | 991.85   | 90  |

## (2) Single crystal X-ray diffraction of **4ka**

White block-like single crystals of **4ka** were grown by layering a dichloromethane solution with *n*-hexane at ambient temperature. X-Ray diffraction data of one these crystals were collected on a R-AXIS SPIDER diffractometer. The measurements were performed with Mo-K $\alpha$  radiation ( $\lambda = 0.71073 \text{ \AA}$ ). Data were collected at 296(2) K, using the  $\omega$ - and  $\varphi$ - scans to a maximum  $\theta$  value of  $25.242^\circ$ . The data were refined by full-matrix least-squares techniques on F<sup>2</sup> with SHELXTL-2014. And the structures were solved by direct methods SHELXS-2014. All the non-hydrogen atoms were refined anisotropically. The hydrogen atoms were included at geometrically idealized positions. And an ORTEP representation of the structure is shown below.



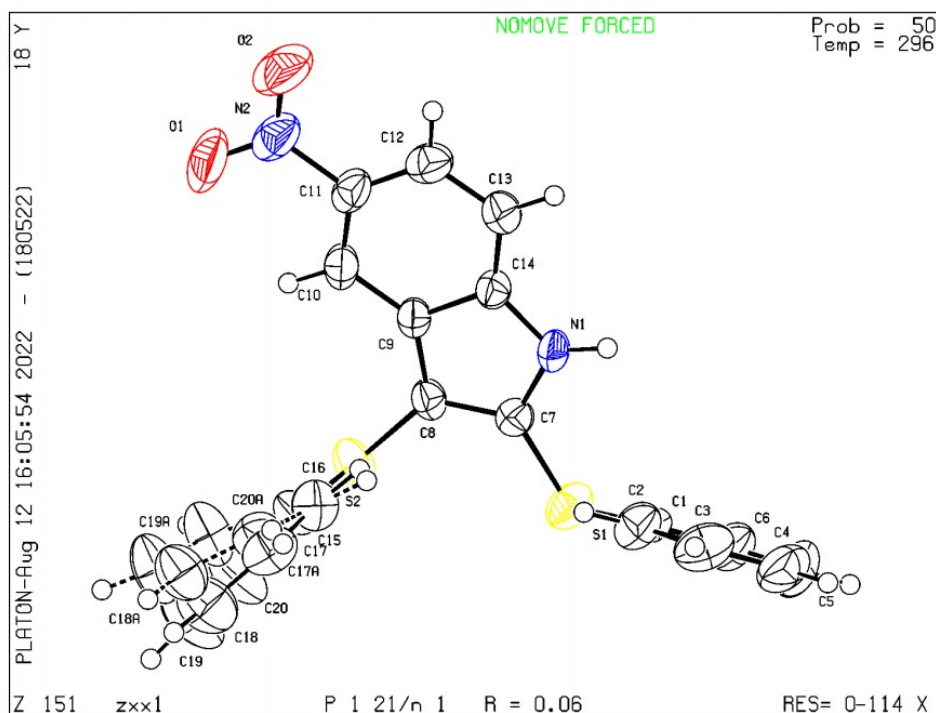

**Figure S2.** ORTEP drawing of **4ka** with the numbering scheme.

**Table S16.** Crystal data and structure refinement for **4ka**

|                                           |                                                                        |                            |
|-------------------------------------------|------------------------------------------------------------------------|----------------------------|
| Identification code                       | 4ka                                                                    |                            |
| Empirical formula                         | $C_{20}H_{14}N_2O_2S_2$                                                |                            |
| Formula weight                            | 378.45                                                                 |                            |
| Temperature                               | 296(2) K                                                               |                            |
| Crystal system                            | Monoclinic                                                             |                            |
| Space group                               | $P2_1/n1$                                                              |                            |
| Unit cell dimensions                      | $a = 13.2398(11) \text{ \AA}$                                          | $\alpha = 90^\circ$        |
|                                           | $b = 10.6639(9) \text{ \AA}$                                           | $\beta = 103.117(9)^\circ$ |
|                                           | $c = 13.3695(12) \text{ \AA}$                                          | $\gamma = 90^\circ$        |
| Volume                                    | $1838.4(3) \text{ \AA}^3$                                              |                            |
| Z                                         | 4                                                                      |                            |
| F(000)                                    | 784                                                                    |                            |
| Crystal size                              | 0.18x 0.14 x 0.13mm <sup>3</sup>                                       |                            |
| 2 $\theta$ range for data collection      | 1.954 to 29.282                                                        |                            |
| Index ranges                              | -14 $\leq$ h $\leq$ 18, -14 $\leq$ k $\leq$ 13, -18 $\leq$ l $\leq$ 10 |                            |
| Reflections collected                     | 8828                                                                   |                            |
| Independent reflections                   | 4214 [R(int) = 0.0355]                                                 |                            |
| Data / restraints / parameters            | 4214 / 146 / 272                                                       |                            |
| Goodness-of-fit on F <sup>2</sup>         | 1.044                                                                  |                            |
| Final R indices [I $\geq$ 2 $\sigma$ (I)] | R1 = 0.0614, wR2 = 0.1158                                              |                            |

Final R indices (all data)

R1 = 0.1026, wR2 = 0.1381

Largest diff. peak and hole

0.248 and -0.271 e.Å<sup>-3</sup>**Table S17.** Fractional Atomic Coordinates ( $\times 10^4$ ) and Equivalent Isotropic Displacement Parameters ( $\text{\AA}^2 \times 10^3$ ) for **4ka**. U(eq) is defined as 1/3 of the trace of the orthogonalised  $U^{ij}$  tensor.

| Atom   | x        | y        | z        | U(eq) |
|--------|----------|----------|----------|-------|
| S(1)   | 4661(1)  | 3807(1)  | 2243(1)  | 54(1) |
| S(2)   | 6885(1)  | 3679(1)  | 4156(1)  | 49(1) |
| O(1)   | 7850(2)  | 7431(3)  | 7166(2)  | 85(1) |
| O(2)   | 6885(2)  | 9067(3)  | 7113(2)  | 89(1) |
| N(1)   | 4535(2)  | 5998(2)  | 3305(2)  | 42(1) |
| N(2)   | 7081(2)  | 8051(3)  | 6768(2)  | 62(1) |
| C(1)   | 4005(2)  | 4692(3)  | 1169(2)  | 41(1) |
| C(2)   | 4396(2)  | 5780(3)  | 849(2)   | 55(1) |
| C(3)   | 3867(3)  | 6370(3)  | -37(2)   | 67(1) |
| C(4)   | 2959(3)  | 5869(4)  | -606(2)  | 73(1) |
| C(5)   | 2578(3)  | 4776(4)  | -292(2)  | 73(1) |
| C(6)   | 3088(2)  | 4195(3)  | 594(2)   | 57(1) |
| C(7)   | 5086(2)  | 4941(2)  | 3188(2)  | 38(1) |
| C(8)   | 5965(2)  | 4885(2)  | 3963(2)  | 39(1) |
| C(9)   | 5961(2)  | 5969(2)  | 4588(2)  | 36(1) |
| C(10)  | 6635(2)  | 6428(3)  | 5469(2)  | 45(1) |
| C(11)  | 6379(2)  | 7550(3)  | 5854(2)  | 47(1) |
| C(12)  | 5495(2)  | 8240(3)  | 5413(2)  | 50(1) |
| C(13)  | 4823(2)  | 7805(3)  | 4546(2)  | 47(1) |
| C(14)  | 5058(2)  | 6664(3)  | 4145(2)  | 37(1) |
| C(15)  | 7938(2)  | 4351(3)  | 3726(2)  | 48(1) |
| C(16)  | 7924(2)  | 5494(3)  | 3260(2)  | 56(1) |
| C(17)  | 8755(7)  | 5914(11) | 2877(7)  | 59(2) |
| C(17A) | 8842(11) | 6010(20) | 3097(13) | 58(3) |
| C(18)  | 9584(8)  | 5171(9)  | 2939(7)  | 82(2) |
| C(18A) | 9771(13) | 5423(14) | 3380(13) | 70(3) |
| C(19)  | 9573(6)  | 3977(8)  | 3311(9)  | 91(3) |
| C(19A) | 9826(9)  | 4376(14) | 3975(16) | 83(4) |
| C(20)  | 8746(6)  | 3533(7)  | 3676(8)  | 75(2) |

**Table S18.** Anisotropic Displacement Parameters ( $\text{\AA}^2 \times 10^3$ ) for **4ka**. The Anisotropic displacement factor exponent takes the form:  $-2\pi^2[h^2a^*U_{11}+2hka^*b^*U_{12}+\dots]$ .

| <b>Atom</b>   | <b>U<sub>11</sub></b> | <b>U<sub>22</sub></b> | <b>U<sub>33</sub></b> | <b>U<sub>23</sub></b> | <b>U<sub>13</sub></b> | <b>U<sub>12</sub></b> |
|---------------|-----------------------|-----------------------|-----------------------|-----------------------|-----------------------|-----------------------|
| <b>S(1)</b>   | 70(1)                 | 41(1)                 | 45(1)                 | -4(1)                 | 0(1)                  | -1(1)                 |
| <b>S(2)</b>   | 41(1)                 | 41(1)                 | 67(1)                 | 12(1)                 | 13(1)                 | 8(1)                  |
| <b>O(1)</b>   | 57(1)                 | 114(2)                | 69(2)                 | -12(2)                | -17(1)                | -22(2)                |
| <b>O(2)</b>   | 94(2)                 | 101(2)                | 72(2)                 | -42(2)                | 16(1)                 | -33(2)                |
| <b>N(1)</b>   | 35(1)                 | 49(1)                 | 36(1)                 | -2(1)                 | -6(1)                 | 8(1)                  |
| <b>N(2)</b>   | 57(2)                 | 84(2)                 | 47(2)                 | -16(2)                | 12(1)                 | -31(2)                |
| <b>C(1)</b>   | 45(2)                 | 44(2)                 | 33(1)                 | -9(1)                 | 8(1)                  | -1(1)                 |
| <b>C(2)</b>   | 59(2)                 | 58(2)                 | 47(2)                 | -4(2)                 | 9(1)                  | -13(2)                |
| <b>C(3)</b>   | 98(3)                 | 56(2)                 | 50(2)                 | 4(2)                  | 23(2)                 | -6(2)                 |
| <b>C(4)</b>   | 94(3)                 | 75(3)                 | 41(2)                 | -3(2)                 | -1(2)                 | 19(2)                 |
| <b>C(5)</b>   | 69(2)                 | 82(3)                 | 56(2)                 | -7(2)                 | -10(2)                | -8(2)                 |
| <b>C(6)</b>   | 60(2)                 | 59(2)                 | 50(2)                 | -7(2)                 | 7(2)                  | -14(2)                |
| <b>C(7)</b>   | 39(1)                 | 40(2)                 | 35(1)                 | -1(1)                 | 7(1)                  | 1(1)                  |
| <b>C(8)</b>   | 32(1)                 | 42(2)                 | 41(1)                 | 4(1)                  | 5(1)                  | 6(1)                  |
| <b>C(9)</b>   | 30(1)                 | 41(2)                 | 35(1)                 | 2(1)                  | 3(1)                  | 1(1)                  |
| <b>C(10)</b>  | 32(1)                 | 60(2)                 | 41(2)                 | 4(1)                  | 1(1)                  | -1(1)                 |
| <b>C(11)</b>  | 40(2)                 | 60(2)                 | 38(2)                 | -5(1)                 | 6(1)                  | -17(1)                |
| <b>C(12)</b>  | 56(2)                 | 48(2)                 | 48(2)                 | -10(2)                | 15(1)                 | -6(1)                 |
| <b>C(13)</b>  | 42(2)                 | 49(2)                 | 49(2)                 | -1(1)                 | 5(1)                  | 8(1)                  |
| <b>C(14)</b>  | 34(1)                 | 42(2)                 | 32(1)                 | 2(1)                  | 4(1)                  | 2(1)                  |
| <b>C(15)</b>  | 45(2)                 | 44(2)                 | 60(2)                 | 6(1)                  | 19(1)                 | 7(1)                  |
| <b>C(16)</b>  | 57(2)                 | 51(2)                 | 58(2)                 | 8(2)                  | 11(1)                 | -1(1)                 |
| <b>C(17)</b>  | 79(4)                 | 54(4)                 | 48(4)                 | 2(3)                  | 19(3)                 | -18(3)                |
| <b>C(17A)</b> | 63(6)                 | 61(6)                 | 51(6)                 | -1(5)                 | 16(5)                 | -7(5)                 |
| <b>C(18)</b>  | 77(5)                 | 91(5)                 | 90(5)                 | 13(4)                 | 43(4)                 | -6(4)                 |
| <b>C(18A)</b> | 57(5)                 | 76(7)                 | 85(8)                 | 10(6)                 | 29(6)                 | -3(5)                 |
| <b>C(19)</b>  | 74(4)                 | 96(5)                 | 118(6)                | 26(4)                 | 57(4)                 | 27(4)                 |
| <b>C(19A)</b> | 52(5)                 | 84(7)                 | 116(8)                | 35(6)                 | 24(6)                 | 5(5)                  |
| <b>C(20)</b>  | 67(4)                 | 64(4)                 | 106(5)                | 25(4)                 | 45(4)                 | 24(3)                 |
| <b>C(20A)</b> | 50(5)                 | 62(6)                 | 99(7)                 | 34(6)                 | 23(5)                 | 6(4)                  |

**Table S19.** Bond Lengths for **4ka**.

| Atom  | Atom  | Length/Å | Atom    | Atom   | Length/Å  |
|-------|-------|----------|---------|--------|-----------|
| S(1)  | C(1)  | 1.772(3) | C(11)   | C(12)  | 1.395(4)  |
| S(1)  | C(7)  | 1.747(3) | C(12)   | H(12)  | 0.9300    |
| S(2)  | C(8)  | 1.749(3) | C(12)   | C(13)  | 1.373(3)  |
| S(2)  | C(15) | 1.775(3) | C(13)   | H(13)  | 0.9300    |
| O(1)  | N(2)  | 1.230(3) | C(13)   | C(14)  | 1.393(4)  |
| O(2)  | N(2)  | 1.227(3) | C(15))  | C(16)  | 1.368(4)  |
| N(1)  | H(1)  | 0.8600   | C(15))  | C(20)  | 1.393(6)  |
| N(1)  | C(7)  | 1.371(3) | C(15)   | C(20A) | 1.434(10) |
| N(1)  | C(14) | 1.375(3) | C(16)   | H(16)  | 0.9300    |
| N(2)  | C(11) | 1.459(3) | C(16)   | H(16A) | 0.9300    |
| C(1)  | C(2)  | 1.378(4) | C(16))  | C(17)  | 1.389(8)  |
| C(1)  | C(6)  | 1.386(4) | C(16)   | C(17A) | 1.395(14) |
| C(2)  | H(2)  | 0.9300   | C(17)   | H(17)  | 0.9300    |
| C(2)  | C(3)  | 1.383(4) | C(17)   | C(18)  | 1.341(8)  |
| C(3)  | H(3)  | 0.9300   | C(17A)  | H(17A) | 0.9300    |
| C(3)  | C(4)  | 1.377(5) | C(17A)) | C(18A) | 1.355(13) |
| C(4)  | H(4)  | 0.9300   | C(18))  | H(18)  | 0.9300    |
| C(4)  | C(5)  | 1.373(5) | C(18)   | C(19)  | 1.369(8)  |
| C(5)  | H(5)  | 0.9300   | C(18A)  | H(18A) | 0.9300    |
| C(5)  | C(6)  | 1.372(4) | C(18A)  | C(19A) | 1.363(13) |
| C(6)  | H(6)  | 0.9300   | C(19)   | H(19)  | 0.9300    |
| C(7)  | C(8)  | 1.373(3) | C(19)   | C(20)  | 1.379(7)  |
| C(8)  | C(9)  | 1.427(3) | C(19A)) | H(19A) | 0.9300    |
| C(9)  | C(10) | 1.395(3) | C(19A)  | C(20A) | 1.388(12) |
| C(9)  | C(14) | 1.417(3) | C(20)   | H(20)  | 0.9300    |
| C(10) | H(10) | 0.9300   | C(20A)  | H(20A) | 0.9300    |
| C(10) | C(11) | 1.374(4) |         |        |           |

**Table S20.** Bond Angles for **4ka**.

| Atom | Atom | Atom  | Angle/°    | Atom  | Atom  | Atom  | Angle/°  |
|------|------|-------|------------|-------|-------|-------|----------|
| C(7) | S(1) | C(1)  | 103.63(12) | C(13) | C(12) | H(12) | 120.0    |
| C(8) | S(2) | C(15) | 103.15(13) | C(12) | C(13) | H(13) | 121.3    |
| C(7) | N(1) | H(1)  | 125.2      | C(12) | C(13) | C(14) | 117.5(2) |

|       |       |       |            |        |        |        |           |
|-------|-------|-------|------------|--------|--------|--------|-----------|
| C(7)  | N(1)  | C(14) | 109.6(2)   | C(14)  | C(13)  | H(13)  | 121.3     |
| C(14) | N(1)  | H(1)  | 125.2      | N(1)   | C(14)  | C(9)   | 107.0(2)  |
| O(1)  | N(2)  | C(11) | 118.2(3)   | N(1)   | C(14)  | C(13)  | 130.5(2)  |
| O(2)  | N(2)  | O(1)  | 122.5(3)   | C(13)  | C(14)  | C(9)   | 122.5(2)  |
| O(2)  | N(2)  | C(11) | 119.3(3)   | C(16)  | C(15)  | S(2)   | 125.2(2)  |
| C(2)  | C(1)  | S(1)  | 123.4(2)   | C(16)  | C(15)  | C(20)  | 117.9(4)  |
| C(2)  | C(1)  | C(6)  | 119.6(3)   | C(16)  | C(15)  | C(20A) | 115.9(5)  |
| C(6)  | C(1)  | S(1)  | 116.9(2)   | C(20)  | C(15)  | S(2)   | 115.5(4)  |
| C(1)  | C(2)  | H(2)  | 120.1      | C(20A) | C(15)  | S(2)   | 115.2(5)  |
| C(1)  | C(2)  | C(3)  | 119.7(3)   | C(15)  | C(16)  | H(16)  | 119.1     |
| C(3)  | C(2)  | H(2)  | 120.1      | C(15)  | C(16)  | H(16A) | 120.0     |
| C(2)  | C(3)  | (3)   | 119.8      | C(15)  | C(16)  | C(17)  | 121.7(6)  |
| C(4)  | C(3)  | C(2)  | 120.4(3)   | C(15)  | C(16)  | C(17A) | 120.0(10) |
| C(4)  | C(3)  | H(3)  | 119.8      | C(17)  | C(16)  | H(16)  | 119.1     |
| C(3)  | C(4)  | H(4)  | 120.1      | C(17A) | C(16)  | H(16A) | 120.0     |
| C(5)  | C(4)  | C(3)  | 119.7(3)   | C(16)  | C(17)  | H(17)  | 120.3     |
| C(5)  | C(4)  | H(4)  | 120.1      | C(18)  | C(17)  | C(16)  | 119.5(9)  |
| C(4)  | C(5)  | H(5)  | 119.8      | C(18)  | C(17)  | H(17)  | 120.3     |
| C(6)  | C(5)  | C(4)  | 120.3(3)   | C(16)  | C(17A) | H(17A) | 118.6     |
| C(6)  | C(5)  | H(5)  | 119.8      | C(18A) | C(17A) | C(16)  | 122.9(18) |
| C(1)  | C(6)  | H(6)  | 119.9      | C(18A) | C(17A) | H(17A) | 118.6     |
| C(5)  | C(6)  | C(1)  | 120.2(3)   | C(17)  | C(18)  | H(18)  | 120.1     |
| C(5)  | C(6)  | H(6)  | 119.9      | C(17)  | C(18)  | C(19)  | 119.8(9)  |
| N(1)  | C(7)  | S(1)  | 124.00(18) | C(19)  | C(18)  | H(18)  | 120.1     |
| N(1)  | C(7)  | C(8)  | 109.4(2)   | C(17A) | C(18A) | H(18A) | 121.1     |
| C(8)  | C(7)  | S(1)  | 126.5(2)   | C(17A) | C(18A) | C(19A) | 117.8(16) |
| C(7)  | C(8)  | S(2)  | 125.9(2)   | C(19A) | C(18A) | H(18A) | 121.1     |
| C(7)  | C(8)  | C(9)  | 106.9(2)   | C(18)  | C(19)  | H(19)  | 119.2     |
| C(9)  | C(8)  | S(2)  | 127.15(18) | C(18)  | C(19)  | C(20)  | 121.5(7)  |
| C(10) | C(9)  | C(8)  | 133.8(2)   | C(20)  | C(19)  | H(19)  | 119.2     |
| C(10) | C(9)  | C(14) | 119.1(2)   | C(18A) | C(19A) | H(19A) | 119.6     |
| C(14) | C(9)  | C(8)  | 107.1(2)   | C(18A) | C(19A) | C(20A) | 120.8(12) |
| C(9)  | C(10) | H(10) | 121.4      | C(20A) | C(19A) | H(19A) | 119.6     |
| C(11) | C(10) | C(9)  | 117.2(2)   | C(15)  | C(20)  | H(20)  | 120.6     |
| C(11) | C(10) | H(10) | 121.4      | C(19)  | C(20)  | C(15)  | 118.8(6)  |

|              |              |              |          |               |               |               |           |
|--------------|--------------|--------------|----------|---------------|---------------|---------------|-----------|
| <b>C(10)</b> | <b>C(11)</b> | <b>N(2)</b>  | 118.0(3) | <b>C(19)</b>  | <b>C(20)</b>  | <b>H(20)</b>  | 120.6     |
| <b>C(10)</b> | <b>C(11)</b> | <b>C(12)</b> | 123.8(2) | <b>C(15)</b>  | <b>C(20A)</b> | <b>H(20A)</b> | 119.9     |
| <b>C(12)</b> | <b>C(11)</b> | <b>N(2)</b>  | 118.3(3) | <b>C(19A)</b> | <b>C(20A)</b> | <b>C(15)</b>  | 120.2(10) |
| <b>C(11)</b> | <b>C(12)</b> | <b>H(12)</b> | 120.0    | <b>C(19A)</b> | <b>C(20A)</b> | <b>H(20A)</b> | 119.9     |
| <b>C(13)</b> | <b>C(12)</b> | <b>C(11)</b> | 119.9(3) |               |               |               |           |

**Table S21.** Hydrogen Atom Coordinates ( $\text{\AA} \times 10^4$ ) and Isotropic Displacement Parameters ( $\text{\AA}^2 \times 10^3$ ) for **4ka**.

| <b>Atom</b>   | <b>x</b> | <b>y</b> | <b>z</b> | <b>U(eq)</b> |
|---------------|----------|----------|----------|--------------|
| <b>H(1)</b>   | 3951     | 6212     | 2913     | 51           |
| <b>H(2)</b>   | 5014     | 6116     | 1227     | 66           |
| <b>H(3)</b>   | 4126     | 7110     | -250     | 80           |
| <b>H(4)</b>   | 2604     | 6270     | -1201    | 87           |
| <b>H(5)</b>   | 1971     | 4428     | -682     | 87           |
| <b>H(6)</b>   | 2817     | 3465     | 811      | 69           |
| <b>H(10)</b>  | 7232     | 5994     | 5782     | 54           |
| <b>H(12)</b>  | 5360     | 8994     | 5708     | 60           |
| <b>H(13)</b>  | 4233     | 8255     | 4237     | 57           |
| <b>H(16)</b>  | 7343     | 6004     | 3197     | 67           |
| <b>H(16A)</b> | 7303     | 5928     | 3051     | 67           |
| <b>H(17)</b>  | 8737     | 6705     | 2580     | 71           |
| <b>H(17A)</b> | 8815     | 6788     | 2779     | 69           |
| <b>H(18)</b>  | 10164    | 5466     | 2730     | 98           |
| <b>H(18A)</b> | 10352    | 5726     | 3176     | 84           |
| <b>H(19)</b>  | 10135    | 3452     | 3319     | 109          |
| <b>H(19A)</b> | 10464    | 3991     | 4223     | 100          |
| <b>H(20)</b>  | 8728     | 2703     | 3886     | 90           |
| <b>H(20A)</b> | 9002     | 3235     | 4695     | 83           |

### (3) Single crystal X-ray diffraction of **5**.

White block-like single crystals of **5** were grown by layering a dichloromethane solution with *n*-hexane at ambient temperature. X-Ray diffraction data of one these crystals were collected on a R-Axis SPIDER diffractometer. The measurements were performed with Mo-K $\alpha$  radiation ( $\lambda = 0.71073 \text{ \AA}$ ). Data were collected at 293(2) K, using the  $\omega$ - and  $\varphi$ - scans to a maximum  $\theta$  value of 25.242°. The data were refined by full-matrix least-squares techniques on F<sup>2</sup> with SHELXTL-2014. And the structures were solved by direct

methods SHELXS-2014. All the non-hydrogen atoms were refined anisotropically. The hydrogen atoms were included at geometrically idealized positions. And an ORTEP representation of the structure is shown below.

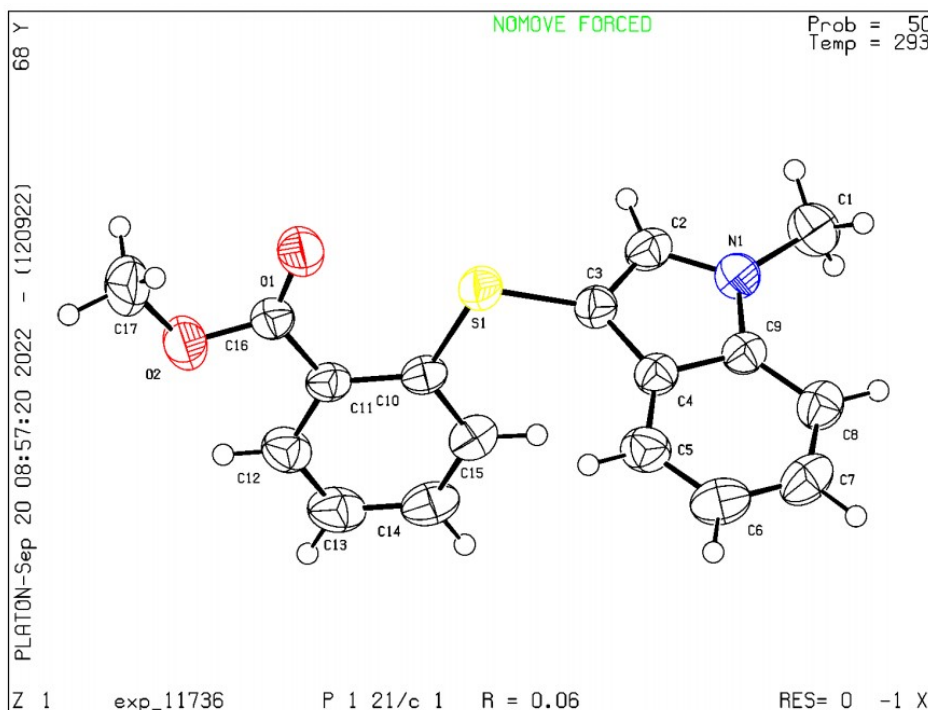

**Figure S3.** ORTEP drawing of **5** with the numbering scheme.

**Table S22.** Crystal data and structure refinement for **5**

|                                      |                                                             |                             |
|--------------------------------------|-------------------------------------------------------------|-----------------------------|
| Identification code                  | 5                                                           |                             |
| Empirical formula                    | $C_{17}H_{15}NO_2S$                                         |                             |
| Formula weight                       | 297.36                                                      |                             |
| Temperature                          | 293(2) K                                                    |                             |
| Crystal system                       | Monoclinic                                                  |                             |
| Space group                          | $P2_1/c$                                                    |                             |
| Unit cell dimensions                 | $a = 7.9527(7) \text{ \AA}$                                 | $\alpha = 90^\circ$ .       |
|                                      | $b = 13.3537(10) \text{ \AA}$                               | $\beta = 98.396(7)^\circ$ . |
|                                      | $c = 13.9904(10) \text{ \AA}$                               | $\gamma = 90^\circ$ .       |
| Volume                               | $1469.8(2) \text{ \AA}^3$                                   |                             |
| Z                                    | 4                                                           |                             |
| F(000)                               | 624.0                                                       |                             |
| Crystal size                         | $0.15 \times 0.12 \times 0.10 \text{ mm}^3$                 |                             |
| $2^\theta$ range for data collection | 4.238 to 58.778                                             |                             |
| Index ranges                         | $-7 \leq h \leq 10, -18 \leq k \leq 16, -18 \leq l \leq 19$ |                             |
| Reflections collected                | 7087                                                        |                             |

|                                     |                                       |
|-------------------------------------|---------------------------------------|
| Independent reflections             | 3370 [Rint = 0.0377, Rsigma = 0.0655] |
| Data / restraints / parameters      | 3370/0/193                            |
| Goodness-of-fit on F <sup>2</sup>   | 1.038                                 |
| Final R indices [I>=2 $\sigma$ (I)] | R1 = 0.0582, wR2 = 0.1122             |
| Final R indices (all data)          | R1 = 0.0955, wR2 = 0.1301             |
| Largest diff. peak and hole         | 0.23/-0.22 e. $\text{\AA}^{-3}$       |

**Table S23.** Fractional Atomic Coordinates ( $\times 10^4$ ) and Equivalent Isotropic Displacement Parameters ( $\text{\AA}^2 \times 10^3$ ) for **5**. U(eq) is defined as 1/3 of the trace of the orthogonalised  $U^{ij}$  tensor.

| Atom       | x         | y          | z           | U(eq)    |
|------------|-----------|------------|-------------|----------|
| <b>S1</b>  | 3009.4(8) | 4525.3(5)  | 6995.1(4)   | 48.3(2)  |
| <b>O2</b>  | 1671(2)   | 3957.1(14) | 9885.9(11)  | 64.3(5)  |
| <b>O1</b>  | 2771(3)   | 4945.8(15) | 8871.7(12)  | 69.6(6)  |
| <b>N1</b>  | 2780(2)   | 4627.6(15) | 4183.1(13)  | 44.8(5)  |
| <b>C11</b> | 1216(3)   | 3509.4(17) | 8252.3(15)  | 39.6(5)  |
| <b>C9</b>  | 3795(3)   | 3791.4(18) | 4336.4(15)  | 39.9(5)  |
| <b>C10</b> | 1615(3)   | 3580.0(17) | 7309.0(15)  | 38.7(5)  |
| <b>C4</b>  | 4022(3)   | 3573.5(18) | 5330.6(15)  | 40.0(6)  |
| <b>C16</b> | 1971(3)   | 4213.4(19) | 9009.8(16)  | 44.8(6)  |
| <b>C3</b>  | 3066(3)   | 4308.5(18) | 5769.4(15)  | 42.1(6)  |
| <b>C15</b> | 879(3)    | 2886.0(19) | 6629.3(17)  | 48.8(6)  |
| <b>C8</b>  | 4540(3)   | 3217.4(19) | 3682.1(17)  | 49.4(6)  |
| <b>C2</b>  | 2354(3)   | 4925.7(18) | 5044.8(16)  | 45.2(6)  |
| <b>C12</b> | 93(3)     | 2771.5(19) | 8468.5(19)  | 50.9(6)  |
| <b>C5</b>  | 5025(3)   | 2757.4(19) | 5666.1(18)  | 52.2(7)  |
| <b>C13</b> | -643(3)   | 2109(2)    | 7778(2)     | 59.1(7)  |
| <b>C14</b> | -228(3)   | 2165.9(19) | 6861.7(19)  | 54.9(7)  |
| <b>C7</b>  | 5508(3)   | 2415(2)    | 4046(2)     | 58.7(7)  |
| <b>C1</b>  | 2293(3)   | 5120(2)    | 3256.5(17)  | 59.4(7)  |
| <b>C6</b>  | 5751(3)   | 2187(2)    | 5025(2)     | 62.0(7)  |
| <b>C17</b> | 2436(4)   | 4590(2)    | 10666.1(18) | 78.8(10) |

**Table S24.** Anisotropic Displacement Parameters ( $\text{\AA}^2 \times 10^3$ ) for **5**. The Anisotropic displacement factor exponent takes the form:  $-2\pi^2[h^2a^{*2}U_{11}+2hka^*b^*U_{12}+\dots]$ .

| Atom      | U <sub>11</sub> | U <sub>22</sub> | U <sub>33</sub> | U <sub>23</sub> | U <sub>13</sub> | U <sub>12</sub> |
|-----------|-----------------|-----------------|-----------------|-----------------|-----------------|-----------------|
| <b>S1</b> | 57.3(4)         | 43.5(4)         | 45.9(4)         | -7.0(3)         | 13.8(3)         | -11.1(3)        |
| <b>O2</b> | 84.9(13)        | 65.2(13)        | 44.9(9)         | -0.5(10)        | 16.7(9)         | -21.3(11)       |
| <b>O1</b> | 107.5(16)       | 54.8(12)        | 48.8(10)        | -7.7(10)        | 19.2(10)        | -31.7(12)       |



|            |          |          |          |           |          |           |
|------------|----------|----------|----------|-----------|----------|-----------|
| <b>N1</b>  | 43.6(11) | 46.1(12) | 43.8(11) | 0.6(10)   | 3.2(9)   | 2.1(10)   |
| <b>C11</b> | 36.9(12) | 33.8(13) | 48.5(13) | -0.3(11)  | 7.8(10)  | 3.8(11)   |
| <b>C9</b>  | 34.6(12) | 39.8(14) | 45.2(12) | -3.6(11)  | 5.2(10)  | -4.5(11)  |
| <b>C10</b> | 34.9(12) | 33.4(12) | 47.2(12) | -2.6(11)  | 3.9(10)  | 4.0(10)   |
| <b>C4</b>  | 37.9(13) | 39.0(13) | 42.8(12) | -3.1(11)  | 5.4(10)  | -4.3(11)  |
| <b>C16</b> | 50.5(15) | 38.4(14) | 47.5(14) | 1.9(12)   | 13.6(11) | 4.5(12)   |
| <b>C3</b>  | 44.5(13) | 40.5(14) | 42.1(12) | -2.7(11)  | 9.4(10)  | -3.7(12)  |
| <b>C15</b> | 47.4(14) | 45.6(15) | 53.1(14) | -8.0(12)  | 6.5(11)  | 0.6(12)   |
| <b>C8</b>  | 45.5(14) | 53.3(17) | 49.7(13) | -7.4(13)  | 7.8(11)  | -5.0(13)  |
| <b>C2</b>  | 42.8(14) | 40.3(14) | 53.6(14) | -6.0(12)  | 11.0(11) | 2.4(12)   |
| <b>C12</b> | 46.1(15) | 46.4(15) | 62.4(15) | 5.5(13)   | 15.3(12) | -1.6(13)  |
| <b>C5</b>  | 56.7(16) | 45.8(15) | 52.2(14) | 3.4(13)   | 1.5(12)  | 4.3(13)   |
| <b>C13</b> | 48.8(16) | 45.2(16) | 85(2)    | -0.3(15)  | 16.7(14) | -11.5(14) |
| <b>C14</b> | 46.1(15) | 42.6(15) | 73.8(18) | -13.5(14) | 1.1(13)  | -6.8(13)  |
| <b>C7</b>  | 48.2(15) | 59.0(18) | 71.0(18) | -19.0(16) | 15.1(13) | 3.3(14)   |
| <b>C1</b>  | 60.8(17) | 62.7(19) | 51.5(14) | 8.1(14)   | -3.1(12) | 7.7(15)   |
| <b>C6</b>  | 56.2(17) | 48.8(17) | 79.5(19) | -3.1(16)  | 4.3(14)  | 12.1(14)  |
| <b>C17</b> | 114(3)   | 81(2)    | 43.1(14) | -9.3(16)  | 17.3(15) | -25(2)    |

**Table S25.** Bond Lengths for **5**.

| <b>Atom</b> | <b>Atom</b> | <b>Length/Å</b> | <b>Atom</b> | <b>Atom</b> | <b>Length/Å</b> |
|-------------|-------------|-----------------|-------------|-------------|-----------------|
| <b>S1</b>   | <b>C10</b>  | 1.777(2)        | <b>C9</b>   | <b>C8</b>   | 1.391(3)        |
| <b>S1</b>   | <b>C3</b>   | 1.746(2)        | <b>C10</b>  | <b>C15</b>  | 1.394(3)        |
| <b>O2</b>   | <b>C16</b>  | 1.327(3)        | <b>C4</b>   | <b>C3</b>   | 1.433(3)        |
| <b>O2</b>   | <b>C17</b>  | 1.443(3)        | <b>C4</b>   | <b>C5</b>   | 1.391(3)        |
| <b>O1</b>   | <b>C16</b>  | 1.197(3)        | <b>C3</b>   | <b>C2</b>   | 1.364(3)        |
| <b>N1</b>   | <b>C9</b>   | 1.376(3)        | <b>C15</b>  | <b>C14</b>  | 1.375(3)        |
| <b>N1</b>   | <b>C2</b>   | 1.359(3)        | <b>C8</b>   | <b>C7</b>   | 1.374(3)        |
| <b>N1</b>   | <b>C1</b>   | 1.455(3)        | <b>C12</b>  | <b>C13</b>  | 1.375(3)        |
| <b>C11</b>  | <b>C10</b>  | 1.405(3)        | <b>C5</b>   | <b>C6</b>   | 1.367(3)        |
| <b>C11</b>  | <b>C16</b>  | 1.477(3)        | <b>C13</b>  | <b>C14</b>  | 1.372(3)        |
| <b>C11</b>  | <b>C12</b>  | 1.393(3)        | <b>C7</b>   | <b>C6</b>   | 1.388(4)        |
| <b>C9</b>   | <b>C4</b>   | 1.407(3)        |             |             |                 |

**Table S26.** Bond Angles for **5**.

| <b>Atom</b> | <b>Atom</b> | <b>Atom</b> | <b>Angle/°</b> | <b>Atom</b> | <b>Atom</b> | <b>Atom</b> | <b>Angle/°</b> |
|-------------|-------------|-------------|----------------|-------------|-------------|-------------|----------------|
| <b>C3</b>   | <b>S1</b>   | <b>C10</b>  | 103.39(11)     | <b>C5</b>   | <b>C4</b>   | <b>C3</b>   | 134.9(2)       |
| <b>C16</b>  | <b>O2</b>   | <b>C17</b>  | 115.8(2)       | <b>O2</b>   | <b>C16</b>  | <b>C11</b>  | 112.9(2)       |
| <b>C9</b>   | <b>N1</b>   | <b>C1</b>   | 125.4(2)       | <b>O1</b>   | <b>C16</b>  | <b>O2</b>   | 122.1(2)       |
| <b>C2</b>   | <b>N1</b>   | <b>C9</b>   | 108.43(19)     | <b>O1</b>   | <b>C16</b>  | <b>C11</b>  | 125.0(2)       |

|     |     |     |            |     |     |     |            |
|-----|-----|-----|------------|-----|-----|-----|------------|
| C2  | N1  | C1  | 126.1(2)   | C4  | C3  | S1  | 128.73(18) |
| C10 | C11 | C16 | 120.5(2)   | C2  | C3  | S1  | 124.20(18) |
| C12 | C11 | C10 | 119.4(2)   | C2  | C3  | C4  | 106.51(19) |
| C12 | C11 | C16 | 120.1(2)   | C14 | C15 | C10 | 121.5(2)   |
| N1  | C9  | C4  | 108.04(19) | C7  | C8  | C9  | 117.1(2)   |
| N1  | C9  | C8  | 129.9(2)   | N1  | C2  | C3  | 110.6(2)   |
| C8  | C9  | C4  | 122.1(2)   | C13 | C12 | C11 | 121.5(2)   |
| C11 | C10 | S1  | 120.95(17) | C6  | C5  | C4  | 119.4(2)   |
| C15 | C10 | S1  | 121.23(17) | C14 | C13 | C12 | 119.0(2)   |
| C15 | C10 | C11 | 117.8(2)   | C13 | C14 | C15 | 120.6(2)   |
| C9  | C4  | C3  | 106.4(2)   | C8  | C7  | C6  | 121.7(2)   |
| C5  | C4  | C9  | 118.7(2)   | C5  | C6  | C7  | 121.0(3)   |

**Table S27.** Hydrogen Atom Coordinates ( $\text{\AA}\times 10^4$ ) and Isotropic Displacement Parameters ( $\text{\AA}^2\times 10^3$ ) for **5**.

| Atom | x        | y       | z        | U(eq) |
|------|----------|---------|----------|-------|
| H15  | 1144.16  | 2910.77 | 6003.82  | 59    |
| H8   | 4389.02  | 3370.55 | 3026.64  | 59    |
| H2   | 1670.31  | 5474.51 | 5128.89  | 54    |
| H12  | -166.27  | 2725.42 | 9094.05  | 61    |
| H5   | 5199.19  | 2600.73 | 6320.8   | 63    |
| H13  | -1409.69 | 1630.19 | 7930.6   | 71    |
| H14  | -700.54  | 1712.87 | 6393.24  | 66    |
| H7   | 6014.66  | 2012.65 | 3625.63  | 70    |
| H1A  | 3273.95  | 5191.78 | 2935.37  | 89    |
| H1B  | 1832.3   | 5769.14 | 3358.53  | 89    |
| H1C  | 1452.04  | 4723.8  | 2864.03  | 89    |
| H6   | 6417.74  | 1639.76 | 5247.74  | 74    |
| H17A | 1878.24  | 5229.25 | 10622.87 | 118   |
| H17B | 3619.83  | 4679.59 | 10621.91 | 118   |
| H17C | 2318.67  | 4281.71 | 11272.85 | 118   |

## 8. Computational Details.

All density functional theory (DFT) calculations with tightSCF and defgrid3 were carried out using ORCA 5.0.3 packages<sup>4,5</sup>. Geometry optimization of all intermediates and transition states were carried out at the (U)M06-2X<sup>6</sup> level of theory using a basis set of def2-TZVP<sup>7</sup> and the conductor-like polarizable continuum model (CPCM) solvent model<sup>8</sup> accounting for the effect of mixed solvents ( $V_{\text{DMSO}}: V_{1,4\text{-dioxane}} = 1 : 5$ ). Frequency analyses at 353.15 K were also performed at the same level of theory as geometry optimization to confirm whether optimized stationary points were either local minimum (no imaginary frequency) or transition state (only one imaginary frequency), as well as to evaluate zero-point vibrational

energies (ZPE) and thermal corrections. Shermo 2.3.4 was used to refine the thermodynamic data<sup>9</sup>. And the intrinsic reaction coordinates (IRC) were done to verify the transition state with the reactant and product. The 3D diagrams of molecules were generated using CYLview2.0<sup>10</sup> and VMD 1.9.3<sup>11</sup>. The Frontier Molecular Orbitals were generated using Multiwfn 3.7<sup>12</sup>.

## (1) The Hypothesized reaction mechanisms of indoline C5–H functionalization.

### (a) Mechanism of Electrophilic Aromatic Substitution.

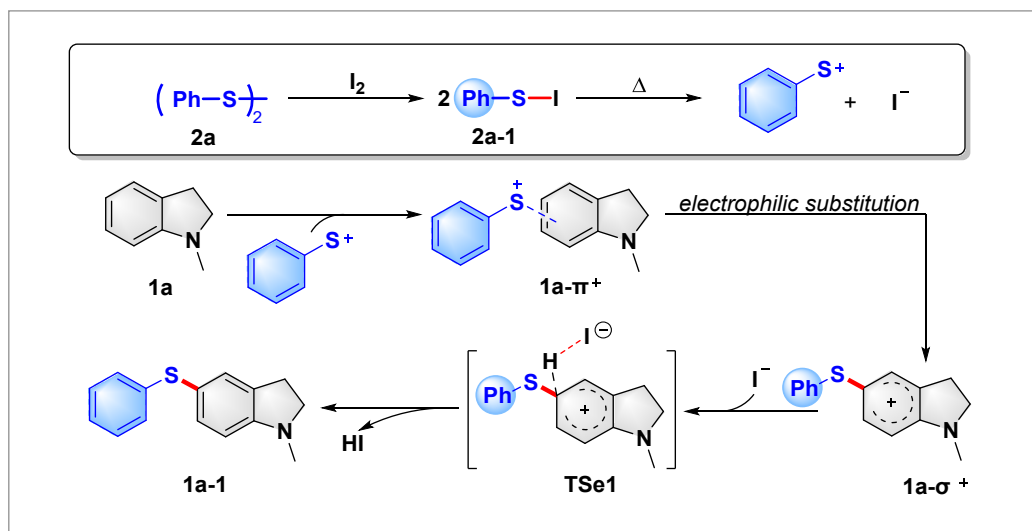

**Table S28.** The thermodynamic data and the image frequency of transition states in electrophilic aromatic substitution.

| Structure               | Eele(a.u.)   | E0(a.u.)     | U(a.u.)      | H(a.u.)      | G(a.u.)      | Image frequency (cm <sup>-1</sup> ) |
|-------------------------|--------------|--------------|--------------|--------------|--------------|-------------------------------------|
| <b>1a</b>               | -404.3027160 | -404.1206424 | -404.1093001 | -404.1081817 | -404.1611783 |                                     |
| <b>PhSI</b>             | -927.4612116 | -927.368249  | -927.3583559 | -927.3572375 | -927.4103003 |                                     |
| <b>PhS<sup>+</sup></b>  | -629.5445557 | -629.453119  | -629.4452929 | -629.4441745 | -629.4901595 |                                     |
| <b>I<sup>-</sup></b>    | -297.8119955 | -297.8119955 | -297.8103179 | -297.8091996 | -297.8324251 |                                     |
| <b>1a-π<sup>+</sup></b> | -1033.945477 | -1033.666688 | -1033.647168 | -1033.646049 | -1033.716184 |                                     |
| <b>1a-σ<sup>+</sup></b> | -1033.947344 | -1033.670006 | -1033.649237 | -1033.648118 | -1033.722211 |                                     |
| <b>TSe1</b>             | -1033.900574 | -1033.628414 | -1033.607918 | -1033.6068   | -1033.68028  | 876.64i                             |
| <b>1a-1</b>             | -1033.534133 | -1033.269508 | -1033.249468 | -1033.248349 | -1033.320712 |                                     |

### (b) Mechanism of Radical Addition .

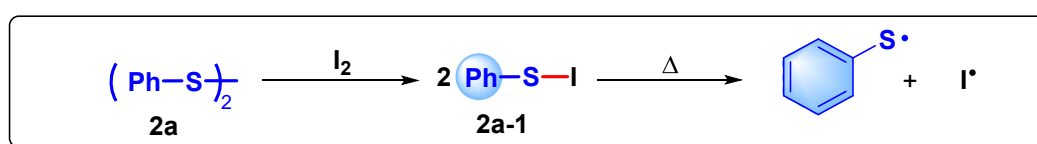

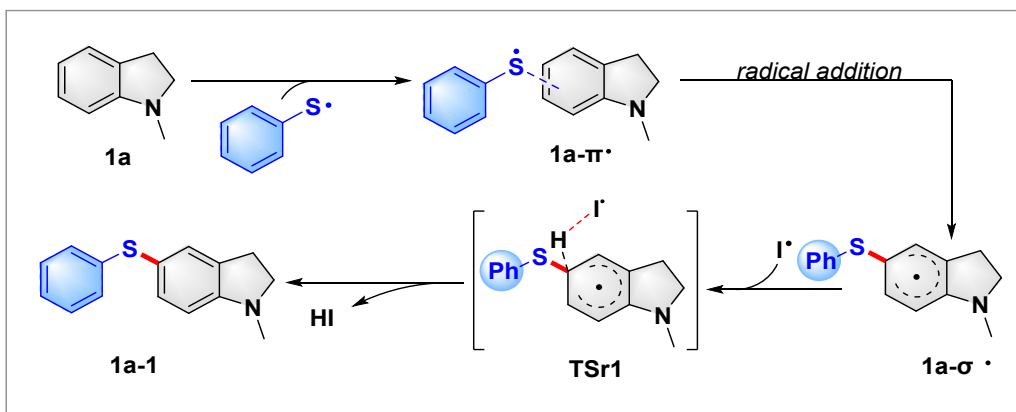

**Table S29.** The thermodynamic data and the image frequency of transition states in radical addition.

| Structure      | Eele(a.u.)   | E0(a.u.)     | U(a.u.)      | H(a.u.)      | G(a.u.)      | Image frequency (cm <sup>-1</sup> ) |
|----------------|--------------|--------------|--------------|--------------|--------------|-------------------------------------|
| I <sub>2</sub> | -595.2566864 | -595.2561743 | -595.252695  | -595.2515766 | -595.2874058 |                                     |
| PhS·           | -629.7866477 | -629.6952811 | -629.6877678 | -629.6866494 | -629.7319149 |                                     |
| I·             | -297.6129165 | -297.6129165 | -297.611239  | -297.6101206 | -297.6341213 |                                     |
| 1a-π·          | -1034.098198 | -1033.824164 | -1033.802698 | -1033.80158  | -1033.878058 |                                     |
| 1a-σ·          | -1033.879139 | -1033.825969 | -1033.804513 | -1033.803395 | -1033.878058 |                                     |
| TSr1           | -1331.751323 | -1331.481603 | -1331.458239 | -1331.457121 | -1331.53817  | 1029.70i                            |
| 1a-1           | -1033.534133 | -1033.269508 | -1033.249468 | -1033.248349 | -1033.320712 |                                     |
| HI             | -298.226218  | -298.226218  | -298.226218  | -298.226218  | -298.226218  |                                     |

**(c) Mechanism of Nucleophilic Substitution.**

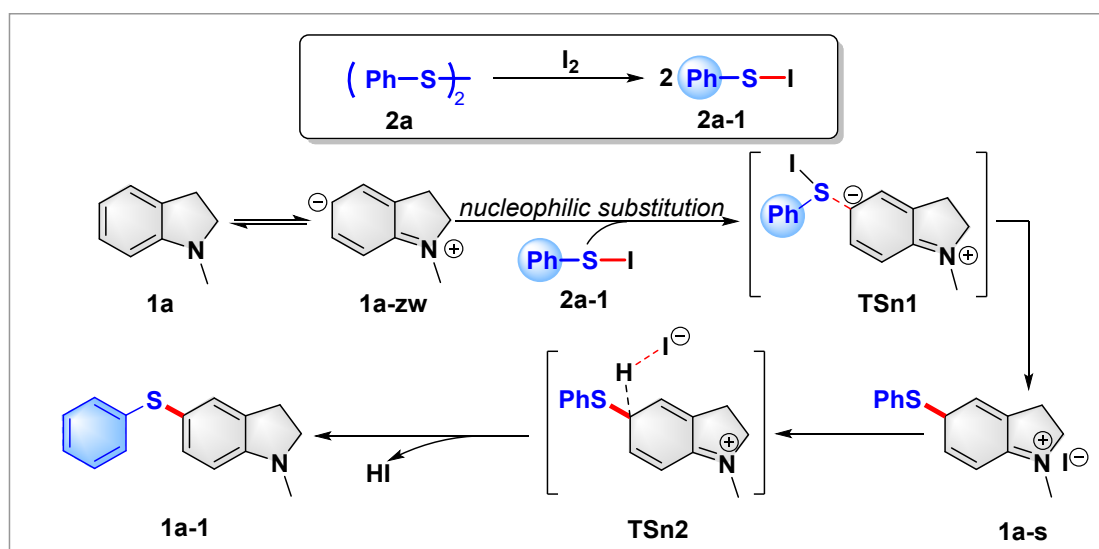

**Table S30.** The thermodynamic data and the image frequency of transition states in nucleophilic substitution.

| Structure    | Eele(a.u.)   | E0(a.u.)     | U(a.u.)      | H(a.u.)      | G(a.u.)      | Image frequency (cm <sup>-1</sup> ) |
|--------------|--------------|--------------|--------------|--------------|--------------|-------------------------------------|
| <b>1a-zw</b> | -404.2990042 | -404.117869  | -404.1068372 | -404.1057189 | -404.1584638 |                                     |
| <b>TSn1</b>  | -1331.75194  | -1331.476097 | -1331.452693 | -1331.451574 | -1331.533367 | 267.22i                             |
| <b>1a-s</b>  | -1331.77739  | -1331.499808 | -1331.476109 | -1331.47499  | -1331.557556 |                                     |
| <b>TSn2</b>  | -1331.751198 | -1331.481586 | -1331.45818  | -1331.457062 | -1331.538299 | 1030.75i                            |
| <b>1a-1</b>  | -1033.534133 | -1033.269508 | -1033.249468 | -1033.248349 | -1033.320712 |                                     |

## (2) The Hypothesized reaction mechanisms of indoline oxidative dehydrogenation.

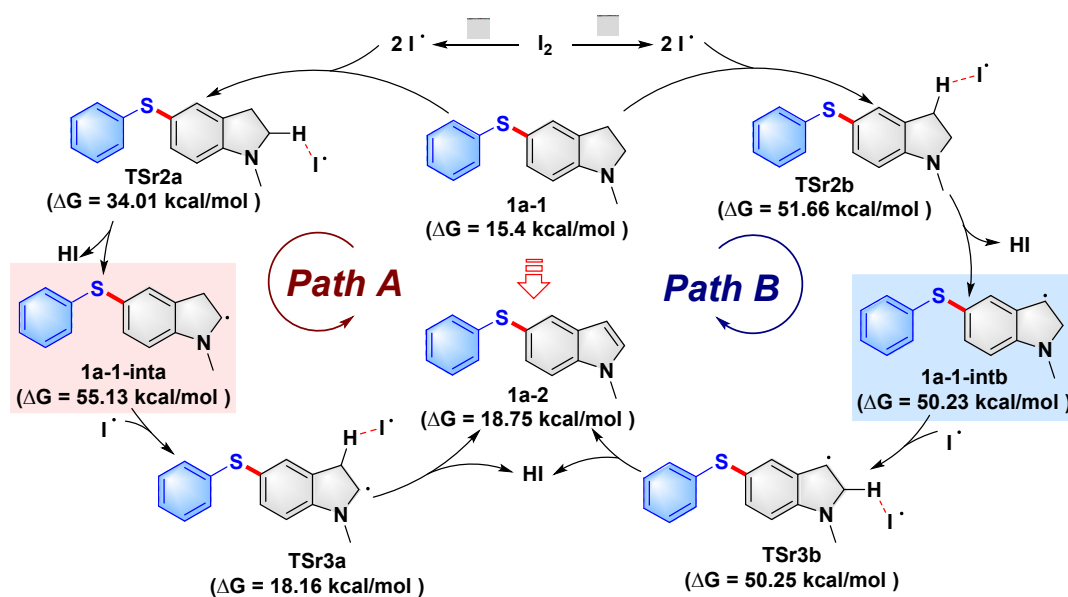

**Table S31.** The thermodynamic data and the image frequency of transition states in oxidative dehydrogenation.

| Structure        | Eele(a.u.)   | E0(a.u.)     | U(a.u.)      | H(a.u.)      | G(a.u.)      | Image frequency (cm <sup>-1</sup> ) |
|------------------|--------------|--------------|--------------|--------------|--------------|-------------------------------------|
| <b>TSr2a</b>     | -1628.778441 | -1628.518167 | -1628.492866 | -1628.491747 | -1628.578475 | 987.69i                             |
| <b>1a-1-inta</b> | -1032.882403 | -1032.632047 | -1032.611686 | -1032.610568 | -1032.684477 |                                     |
| <b>TSr3a</b>     | -1330.568237 | -1330.321578 | -1330.29927  | -1330.298151 | -1330.377505 | 945.63i                             |
| <b>TSr2b</b>     | -1331.114624 | -1330.860167 | -1330.838178 | -1330.83706  | -1330.916216 | 638.86i                             |
| <b>1a-1-intb</b> | -1032.88995  | -1032.63981  | -1032.619452 | -1032.618333 | -1032.692277 |                                     |
| <b>TSr3b</b>     | -1032.890007 | -1032.639853 | -1032.619536 | -1032.618417 | -1032.692244 | 855.38i                             |
| <b>1a-2</b>      | -1032.341024 | -1032.099595 | -1032.080136 | -1032.079017 | -1032.15035  |                                     |

## (3) The Hypothesized reaction mechanisms of indole C3–H functionalization.

(a) Mechanism of Electrophilic Aromatic Substitution.

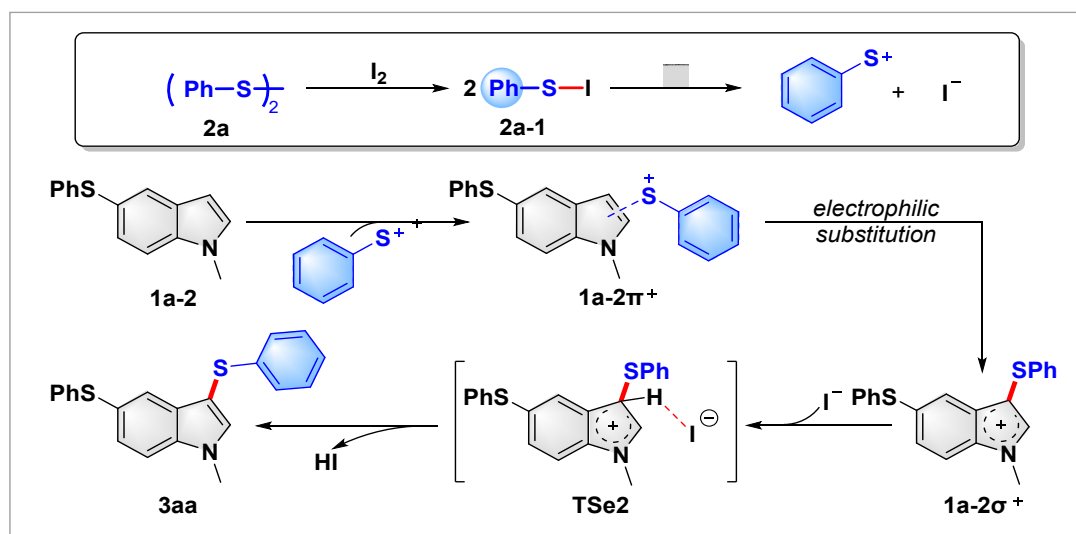

**Table S32.** The thermodynamic data and the image frequency of transition states in electrophilic aromatic substitution.

| Structure                | Eele(a.u.)   | E0(a.u.)     | U(a.u.)      | H(a.u.)      | G(a.u.)      | Image frequency (cm <sup>-1</sup> ) |
|--------------------------|--------------|--------------|--------------|--------------|--------------|-------------------------------------|
| <b>1a-2</b>              | -1032.341024 | -1032.099595 | -1032.080136 | -1032.079017 | -1032.15035  |                                     |
| <b>1a-2π<sup>+</sup></b> | -1661.967838 | -1661.631475 | -1661.603261 | -1661.602142 | -1661.690832 |                                     |
| <b>1a-2σ<sup>+</sup></b> | -1661.983593 | -1661.647006 | -1661.618703 | -1661.617584 | -1661.707477 |                                     |
| <b>TSe2</b>              | -1959.797572 | -1959.468208 | -1959.437174 | -1959.436056 | -1959.53278  | 918.03i                             |
| <b>3aa</b>               | -1661.573882 | -1661.249836 | -1661.221655 | -1661.220536 | -1661.310018 |                                     |

(b) Mechanism of Radical Addition.

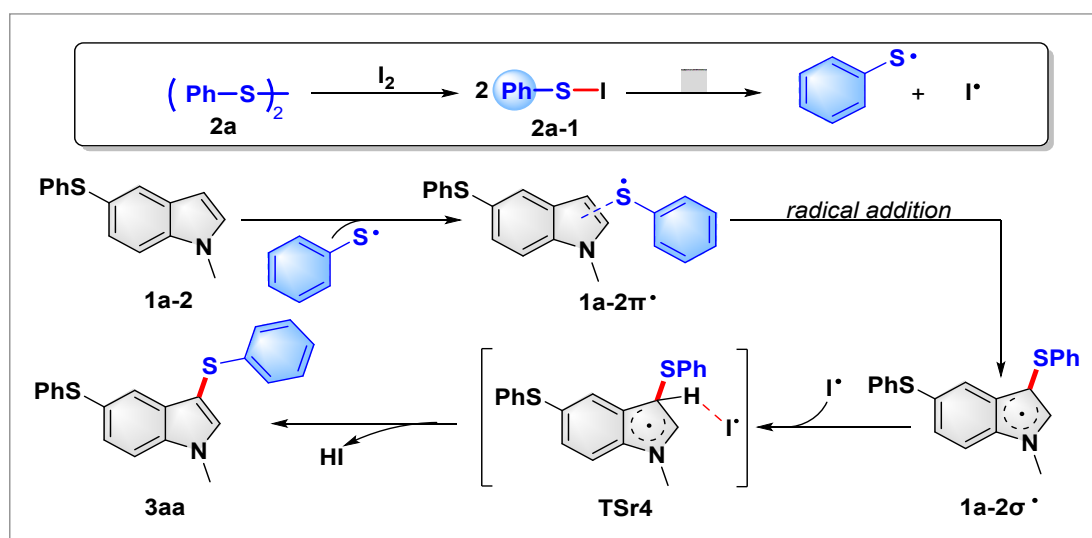

**Table S33.** The thermodynamic data and the image frequency of transition states in radical addition.

| Structure                      | Eele(a.u.)   | E0(a.u.)     | U(a.u.)      | H(a.u.)      | G(a.u.)      | Image frequency (cm <sup>-1</sup> ) |
|--------------------------------|--------------|--------------|--------------|--------------|--------------|-------------------------------------|
| <b>1a-2</b>                    | -1032.341024 | -1032.099595 | -1032.080136 | -1032.079017 | -1032.15035  |                                     |
| <b>1a-2<math>\pi</math></b>    | -1662.139654 | -1661.805993 | -1661.776629 | -1661.775511 | -1661.868418 |                                     |
| <b>1a-2<math>\sigma</math></b> | -1662.136829 | -1661.803365 | -1661.773863 | -1661.772745 | -1661.865632 |                                     |
| <b>TSr4</b>                    | -1959.795408 | -1959.465795 | -1959.434895 | -1959.433777 | -1959.529513 | 1004.19i                            |
| <b>3aa</b>                     | -1661.573882 | -1661.249836 | -1661.221655 | -1661.220536 | -1661.310018 |                                     |

**Note:** at the M06-2X/def2-TZVP level of theory with CPCM(mixed solvent).

**(4) The free energy and Boltzmann distribution (P%) of the intermediate sigma complexes at 4, 5, 6 and 7 positions of 1a.**

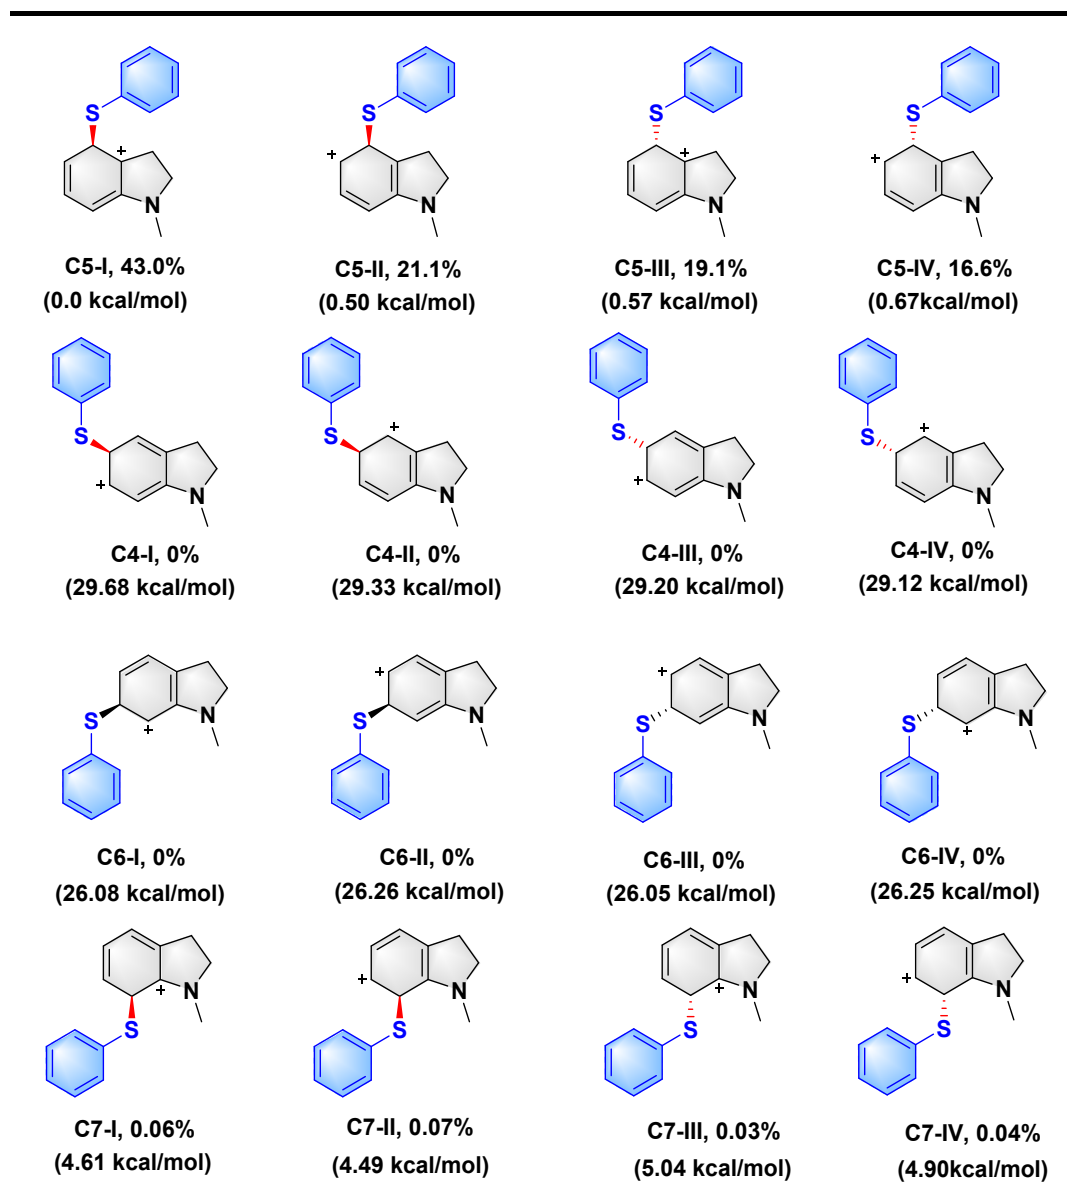

**Table S34.** The thermodynamic data and Boltzmann distribution (P%) of the intermediate sigma complexes at 4, 5, 6 and 7 positions of **1a**.

| Structures    | Eele(a.u.) | ZPE(a.u.) | U(a.u.)   | H(a.u.) | G(a.u.)  | dG(kcal/mol) | P%    |
|---------------|------------|-----------|-----------|---------|----------|--------------|-------|
|               | -          | -         | -         | -       | -        |              |       |
| <b>C4-I</b>   | 1033.8964  | 1033.6211 | 1033.6003 | 1033.59 | 1033.673 | 29.68        | 0.00  |
|               | 88         | 84        | 16        | 9197    | 124      |              |       |
|               | -          | -         | -         | -       | -        |              |       |
| <b>C4-II</b>  | 1033.8965  | 1033.6213 | 1033.6004 | 1033.59 | 1033.673 | 29.33        | 0.00  |
|               | 23         | 46        | 22        | 9304    | 418      |              |       |
|               | -          | -         | -         | -       | -        |              |       |
| <b>C4-III</b> | 1033.8969  | 1033.6217 | 1033.6008 | 1033.59 | 1033.673 | 29.20        | 0.00  |
|               | 99         | 59        | 55        | 9737    | 758      |              |       |
|               | -          | -         | -         | -       | -        |              |       |
| <b>C4-IV</b>  | 1033.8964  | 1033.6214 | 1033.6004 | 1033.59 | 1033.673 | 29.12        | 0.00  |
|               | 87         | 28        | 58        | 934     | 567      |              |       |
|               | -          | -         | -         | -       | -        |              |       |
| <b>C5-I</b>   | 1033.9473  | 1033.6700 | 1033.6492 | 1033.64 | 1033.722 | 0.00         | 43.01 |
|               | 44         | 06        | 37        | 8118    | 211      |              |       |
|               | -          | -         | -         | -       | -        |              |       |
| <b>C5-II</b>  | 1033.9469  | 1033.6694 | 1033.6487 | 1033.64 | 1033.721 | 0.50         | 21.10 |
|               | 08         | 36        | 5         | 7632    | 594      |              |       |
|               | -          | -         | -         | -       | -        |              |       |
| <b>C5-III</b> | 1033.9469  | 1033.6694 | 1033.6487 | 1033.64 | 1033.721 | 0.57         | 19.06 |
|               | 15         | 3         | 48        | 763     | 541      |              |       |
|               | -          | -         | -         | -       | -        |              |       |
| <b>C5-IV</b>  | 1033.9469  | 1033.6693 | 1033.6487 | 1033.64 | 1033.721 | 0.67         | 16.63 |
|               | 05         | 82        | 14        | 7595    | 46       |              |       |
|               | -          | -         | -         | -       | -        |              |       |
| <b>C6-I</b>   | 1033.9013  | 1033.6263 | 1033.6054 | 1033.60 | 1033.678 | 26.08        | 0.00  |
|               | 27         | 39        | 82        | 4364    | 409      |              |       |
|               | -          | -         | -         | -       | -        |              |       |
| <b>C6-II</b>  | 1033.9013  | 1033.6262 | 1033.6054 | 1033.60 | 1033.678 | 26.26        | 0.00  |
|               | 2          | 78        | 55        | 4337    | 263      |              |       |
|               | -          | -         | -         | -       | -        |              |       |
| <b>C6-III</b> | 1033.9013  | 1033.6263 | 1033.6054 | 1033.60 | 1033.678 | 26.05        | 0.00  |
|               | 31         | 57        | 89        | 4371    | 439      |              |       |
|               | -          | -         | -         | -       | -        |              |       |
| <b>C6-IV</b>  | 1033.9013  | 1033.6262 | 1033.6054 | 1033.60 | 1033.678 | 26.25        | 0.00  |
|               | 2          | 82        | 6         | 4341    | 274      |              |       |
|               | -          | -         | -         | -       | -        |              |       |
| <b>C7-I</b>   | 1033.9404  | 1033.6631 | 1033.6425 | 1033.64 | 1033.715 | 4.61         | 0.06  |
|               | 86         | 94        | 26        | 1408    | 104      |              |       |
| <b>C7-II</b>  | -          | -         | -         | -       | -        | 4.49         | 0.07  |



|               |           |           |           |         |          |      |      |
|---------------|-----------|-----------|-----------|---------|----------|------|------|
|               | 1033.9404 | 1033.6632 | 1033.6425 | 1033.64 | 1033.715 |      |      |
|               | 58        | 09        | 2         | 1402    | 186      |      |      |
|               | -         | -         | -         | -       | -        |      |      |
| <b>C7-III</b> | 1033.9444 | 1033.6662 | 1033.6462 | 1033.64 | 1033.716 | 5.04 | 0.03 |
|               | 07        | 95        | 41        | 5123    | 722      |      |      |
|               | -         | -         | -         | -       | -        |      |      |
| <b>C7-IV</b>  | 1033.9444 | 1033.6663 | 1033.6462 | 1033.64 | 1033.716 | 4.90 | 0.04 |
|               | 34        | 78        | 94        | 5176    | 849      |      |      |

**Note:** at the M06-2X/def2-TZVP level of theory with CPCM (mixed solvent).

**(5) The free energy and Boltzmann distribution (P%) of the intermediate sigma complexes at 2 and 3 positions of 1a-2.**

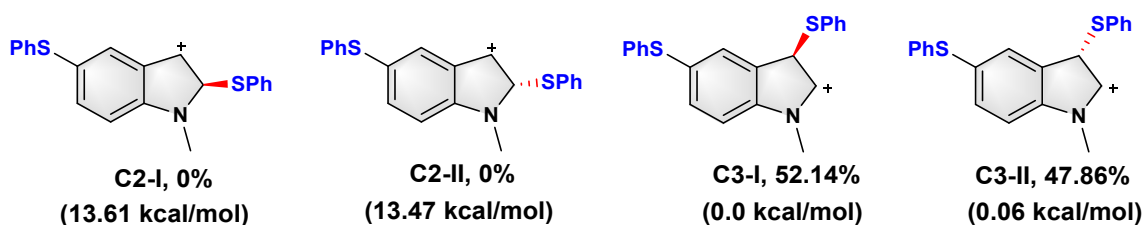

**Table S35.** The thermodynamic data and Boltzmann distribution (P%) of the intermediate sigma complexes at 2,3 positions of **1a-2**.

| Structures   | Eele(a.u.) | ZPE(a.u.) | U(a.u.) | H(a.u.) | G(a.u.) | dG(kcal/mol) | P%    |
|--------------|------------|-----------|---------|---------|---------|--------------|-------|
|              | -          | -         | -       | -       | -       |              |       |
| <b>C2-I</b>  | 1661.9605  | 1661.6247 | 1661.5  | 1661.59 | 1661.68 | 13.61        | 0.00  |
|              | 89         | 91        | 96193   | 5075    | 5783    |              |       |
|              | -          | -         | -       | -       | -       |              |       |
| <b>C2-II</b> | 1661.9606  | 1661.6249 | 1661.5  | 1661.59 | 1661.68 | 13.47        | 0.00  |
|              | 08         | 44        | 96261   | 5143    | 6006    |              |       |
|              | -          | -         | -       | -       | -       |              |       |
| <b>C3-I</b>  | 1661.9835  | 1661.6470 | 1661.6  | 1661.61 | 1661.70 | 0.00         | 52.14 |
|              | 93         | 06        | 18703   | 7584    | 7477    |              |       |
|              | -          | -         | -       | -       | -       |              |       |
| <b>C2-II</b> | 1661.9836  | 1661.6469 | 1661.6  | 1661.61 | 1661.70 | 0.06         | 47.86 |
|              | 46         | 89        | 18729   | 761     | 7381    |              |       |

**Note:** at the M06-2X/def2-TZVP level of theory with CPCM (mixed solvent).

**(6) All Opted Species Cartesian Coordinates.**

**Table S36.** The Cartesian Coordinates of **1a**.

|   |            |           |           |
|---|------------|-----------|-----------|
| N | -7.818971  | 0.340639  | -0.288220 |
| C | -7.649563  | 0.807001  | 1.094137  |
| C | -8.556976  | -0.123710 | 1.909148  |
| C | -10.867734 | -1.031053 | 1.034157  |
| C | -11.640141 | -1.276061 | -0.106385 |
| C | -11.141222 | -0.959676 | -1.362340 |
| C | -9.872605  | -0.398537 | -1.519939 |
| C | -9.111237  | -0.172845 | -0.380565 |
| C | -9.614308  | -0.476707 | 0.892302  |
| C | -7.344011  | 1.228704  | -1.326099 |
| H | -6.601613  | 0.766772  | 1.388021  |
| H | -7.997959  | 1.846735  | 1.178317  |
| H | -8.011869  | -1.021966 | 2.212458  |
| H | -8.951866  | 0.352732  | 2.804514  |
| H | -11.256151 | -1.264947 | 2.018645  |
| H | -12.629392 | -1.703522 | -0.008772 |
| H | -11.748858 | -1.141478 | -2.240277 |
| H | -9.500853  | -0.148706 | -2.505132 |
| H | -6.310440  | 1.501458  | -1.115796 |
| H | -7.373439  | 0.728568  | -2.293349 |
| H | -7.945790  | 2.146500  | -1.384526 |

**Table S37.** The Cartesian Coordinates of **PhSI**.

|   |            |           |           |
|---|------------|-----------|-----------|
| C | -9.410431  | 0.706111  | -0.557058 |
| C | -9.505162  | -1.387776 | 0.620943  |
| C | -10.892737 | -1.372056 | 0.527559  |
| C | -11.539052 | -0.318112 | -0.107004 |
| C | -10.800648 | 0.725024  | -0.648546 |
| S | -8.466179  | 1.993687  | -1.318374 |
| I | -8.136145  | 3.503841  | 0.517452  |
| H | -7.680131  | -0.353088 | 0.144197  |
| H | -9.002228  | -2.209359 | 1.114305  |
| H | -11.470924 | -2.184029 | 0.949668  |
| H | -12.618799 | -0.306232 | -0.180266 |
| H | -11.294199 | 1.553117  | -1.140996 |

**Table S38.** The Cartesian Coordinates of **PhS<sup>+</sup>**.

|   |            |           |           |
|---|------------|-----------|-----------|
| C | -9.216134  | 1.048077  | -0.277317 |
| C | -8.666260  | -0.255859 | 0.070213  |
| C | -9.510048  | -1.297623 | 0.345046  |
| C | -10.907200 | -1.085602 | 0.287387  |
| C | -11.482994 | 0.162509  | -0.045074 |
| C | -10.662465 | 1.221456  | -0.325621 |
| S | -8.222366  | 2.301235  | -0.611048 |

|   |            |           |           |
|---|------------|-----------|-----------|
| H | -7.580502  | -0.363384 | 0.101925  |
| H | -9.122434  | -2.281292 | 0.608672  |
| H | -11.571652 | -1.924036 | 0.511136  |
| H | -12.567162 | 0.268566  | -0.075256 |
| H | -11.052883 | 2.205854  | -0.590263 |

**Table S39.** The Cartesian Coordinates of  $\mathbf{1a-\pi^+}$ .

|   |           |           |           |
|---|-----------|-----------|-----------|
| N | -1.014333 | 0.807621  | -1.214104 |
| C | -0.184098 | 1.095982  | 0.033455  |
| C | -0.483570 | -0.034429 | 1.017881  |
| C | -1.244608 | -2.461952 | 0.390311  |
| C | -1.767855 | -3.262524 | -0.616501 |
| C | -2.049774 | -2.739621 | -1.878579 |
| C | -1.815697 | -1.400628 | -2.158741 |
| C | -1.286900 | -0.634994 | -1.137317 |
| C | -1.001772 | -1.121794 | 0.121377  |
| C | -0.275600 | 1.203143  | -2.453607 |
| S | -2.569127 | 1.767468  | -1.280006 |
| C | -3.270913 | 1.373912  | 0.280113  |
| C | -3.970261 | 0.178112  | 0.453951  |
| C | -4.507011 | -0.120027 | 1.696956  |
| C | -4.367975 | 0.781023  | 2.747409  |
| C | -3.696824 | 1.985046  | 2.564174  |
| C | -3.140691 | 2.284317  | 1.330077  |
| H | -3.603146 | 2.687062  | 3.381991  |
| H | -4.794500 | 0.546758  | 3.714455  |
| H | -5.042101 | -1.049058 | 1.842414  |
| H | -4.083343 | -0.507743 | -0.376640 |
| H | -2.607493 | 3.213537  | 1.173779  |
| H | -1.960764 | -4.309147 | -0.420430 |
| H | -2.457307 | -3.380195 | -2.648982 |
| H | -2.048875 | -0.981539 | -3.128833 |
| H | -1.030276 | -2.871865 | 1.368929  |
| H | 0.853709  | 1.057439  | -0.292308 |
| H | -0.421190 | 2.097133  | 0.381262  |
| H | -1.233649 | 0.247557  | 1.758495  |
| H | 0.421102  | -0.330366 | 1.546520  |
| H | -0.009452 | 2.253531  | -2.362153 |
| H | 0.612674  | 0.579683  | -2.519184 |
| H | -0.918481 | 1.046556  | -3.316063 |

**Table S40.** The Cartesian Coordinates of  $\mathbf{1a-\sigma^+}$ .

|   |           |           |           |
|---|-----------|-----------|-----------|
| C | -0.097076 | 0.778548  | -0.359310 |
| C | 0.194987  | -0.656043 | -0.600281 |

|   |           |           |           |
|---|-----------|-----------|-----------|
| C | 1.420851  | -1.192162 | -0.527108 |
| C | 2.516318  | -0.311041 | -0.227964 |
| C | 2.313393  | 1.114358  | -0.030692 |
| C | 1.090290  | 1.635231  | -0.095704 |
| N | 3.770831  | -0.614325 | -0.098596 |
| C | 4.625274  | 0.550840  | 0.199232  |
| C | 3.658395  | 1.744863  | 0.222526  |
| C | 4.388750  | -1.921829 | -0.215893 |
| S | -1.204682 | 0.910044  | 1.122394  |
| C | -2.711990 | 0.249689  | 0.455031  |
| C | -3.423149 | 0.954963  | -0.514338 |
| C | -4.613567 | 0.440928  | -1.006484 |
| C | -5.107504 | -0.764714 | -0.519201 |
| C | -4.404878 | -1.460484 | 0.455526  |
| C | -3.201990 | -0.959746 | 0.939154  |
| H | -0.678034 | 1.190616  | -1.189573 |
| H | -0.657102 | -1.287747 | -0.825206 |
| H | 1.584168  | -2.247644 | -0.687993 |
| H | 0.917424  | 2.694883  | 0.052465  |
| H | 5.385659  | 0.622060  | -0.578037 |
| H | 5.118610  | 0.372927  | 1.154659  |
| H | 3.679101  | 2.257812  | 1.182030  |
| H | 3.902605  | 2.467844  | -0.553878 |
| H | 3.634782  | -2.689752 | -0.348414 |
| H | 5.067663  | -1.912846 | -1.068596 |
| H | 4.958368  | -2.115590 | 0.692536  |
| H | -3.045827 | 1.904054  | -0.876011 |
| H | -5.162505 | 0.988238  | -1.761903 |
| H | -6.041347 | -1.158984 | -0.898736 |
| H | -4.786481 | -2.398863 | 0.836710  |
| H | -2.642203 | -1.504187 | 1.689024  |

**Table S41.** The Cartesian Coordinates of **TSe1**.

|   |            |           |           |
|---|------------|-----------|-----------|
| C | -9.343493  | 0.093323  | 0.888532  |
| C | -8.734694  | 0.067060  | -0.409730 |
| C | -7.495569  | -0.577408 | -0.637268 |
| C | -6.879792  | -1.196369 | 0.432773  |
| C | -7.504545  | -1.210413 | 1.728333  |
| C | -8.691614  | -0.608606 | 1.957406  |
| N | -5.718856  | -1.864807 | 0.479644  |
| C | -5.571955  | -2.610100 | 1.733362  |
| C | -6.602677  | -1.958011 | 2.669936  |
| C | -4.934410  | -2.193947 | -0.687154 |
| S | -10.776788 | 1.015295  | 1.323295  |

|   |            |           |           |
|---|------------|-----------|-----------|
| C | -11.152451 | 1.879416  | -0.180025 |
| C | -10.561443 | 3.113503  | -0.437256 |
| C | -10.878607 | 3.790226  | -1.606618 |
| C | -11.782593 | 3.239018  | -2.507702 |
| C | -12.374517 | 2.010430  | -2.242950 |
| C | -12.062445 | 1.325854  | -1.075700 |
| H | -9.628695  | -0.801832 | -0.094939 |
| H | -9.201676  | 0.634490  | -1.205054 |
| H | -7.087202  | -0.593477 | -1.636520 |
| H | -9.154507  | -0.619977 | 2.936516  |
| H | -4.550769  | -2.524549 | 2.101089  |
| H | -5.792777  | -3.667582 | 1.560986  |
| H | -7.142824  | -2.680768 | 3.277289  |
| H | -6.123397  | -1.243457 | 3.342043  |
| H | -3.936681  | -2.487793 | -0.367189 |
| H | -4.849780  | -1.321873 | -1.334652 |
| H | -5.385289  | -3.016307 | -1.251252 |
| H | -9.861317  | 3.535606  | 0.272375  |
| H | -10.422474 | 4.749978  | -1.811340 |
| H | -12.029257 | 3.771428  | -3.417276 |
| H | -13.081004 | 1.583432  | -2.942649 |
| H | -12.518900 | 0.368419  | -0.858200 |

**Table S42.** The Cartesian Coordinates of **1a-1**.

|   |            |           |           |
|---|------------|-----------|-----------|
| C | -9.763485  | -1.113520 | -0.822855 |
| C | -10.178627 | -0.169531 | -1.764896 |
| C | -9.437402  | 0.991457  | -2.009417 |
| C | -8.265816  | 1.196468  | -1.273560 |
| C | -7.832121  | 0.236047  | -0.331658 |
| C | -8.569537  | -0.907866 | -0.102107 |
| S | -10.716006 | -2.589035 | -0.560804 |
| N | -7.387947  | 2.256521  | -1.319006 |
| C | -6.131827  | 1.847137  | -0.686107 |
| C | -6.556323  | 0.745640  | 0.299178  |
| C | -7.337891  | 3.152465  | -2.446538 |
| C | -11.716185 | -2.177074 | 0.857228  |
| C | -12.443262 | -3.223961 | 1.441732  |
| C | -13.256183 | -2.977673 | 2.545953  |
| C | -13.348895 | -1.691332 | 3.081893  |
| C | -12.624712 | -0.652320 | 2.497917  |
| C | -11.811049 | -0.886696 | 1.388205  |
| H | -11.098888 | -0.348698 | -2.324400 |
| H | -9.773490  | 1.709352  | -2.757913 |
| H | -8.237010  | -1.652851 | 0.624289  |

|          |            |           |           |
|----------|------------|-----------|-----------|
| <b>H</b> | -5.439585  | 1.442562  | -1.450620 |
| <b>H</b> | -5.641625  | 2.701440  | -0.199831 |
| <b>H</b> | -6.772149  | 1.174324  | 1.291448  |
| <b>H</b> | -5.788988  | -0.028516 | 0.427017  |
| <b>H</b> | -6.703956  | 4.013668  | -2.196125 |
| <b>H</b> | -6.927582  | 2.665743  | -3.352195 |
| <b>H</b> | -8.343827  | 3.528772  | -2.676412 |
| <b>H</b> | -12.363961 | -4.233722 | 1.031993  |
| <b>H</b> | -13.815240 | -3.800522 | 2.995430  |
| <b>H</b> | -13.981820 | -1.499989 | 3.949641  |
| <b>H</b> | -12.692367 | 0.357730  | 2.906543  |
| <b>H</b> | -11.252043 | -0.065922 | 0.935979  |

**Table S43.** The Cartesian Coordinates of **I<sup>\*</sup>**.

|          |          |          |          |
|----------|----------|----------|----------|
| <b>I</b> | 0.668790 | 1.656051 | 0.000000 |
|----------|----------|----------|----------|

**Table S44.** The Cartesian Coordinates of **PhS<sup>\*</sup>**.

|          |           |           |           |
|----------|-----------|-----------|-----------|
| <b>S</b> | -0.862794 | 2.349388  | -0.624735 |
| <b>C</b> | -1.904084 | 1.037091  | -0.275029 |
| <b>C</b> | -1.377309 | -0.228019 | 0.063235  |
| <b>C</b> | -2.220842 | -1.284814 | 0.343205  |
| <b>C</b> | -3.602462 | -1.105548 | 0.293048  |
| <b>C</b> | -4.141692 | 0.136636  | -0.038279 |
| <b>C</b> | -3.305616 | 1.198989  | -0.319930 |
| <b>H</b> | -0.302832 | -0.352806 | 0.098577  |
| <b>H</b> | -1.809228 | -2.251734 | 0.601336  |
| <b>H</b> | -4.260827 | -1.936352 | 0.512577  |
| <b>H</b> | -5.215137 | 0.268622  | -0.075171 |
| <b>H</b> | -3.710678 | 2.168647  | -0.578834 |

**Table S45.** The Cartesian Coordinates of **1a- $\pi$ <sup>\*</sup>**.

|          |           |           |           |
|----------|-----------|-----------|-----------|
| <b>C</b> | -3.363684 | -0.998653 | -2.213155 |
| <b>C</b> | -3.362982 | -2.092579 | -1.356372 |
| <b>C</b> | -2.401214 | -2.230766 | -0.354035 |
| <b>C</b> | -1.442031 | -1.235276 | -0.228120 |
| <b>C</b> | -1.424272 | -0.137251 | -1.102596 |
| <b>C</b> | -2.382373 | -0.011217 | -2.085078 |
| <b>N</b> | -0.412266 | -1.137218 | 0.701020  |
| <b>C</b> | 0.575943  | -0.201728 | 0.148874  |
| <b>C</b> | -0.258156 | 0.741805  | -0.729484 |
| <b>C</b> | 0.106186  | -2.341406 | 1.310786  |

|   |           |           |           |
|---|-----------|-----------|-----------|
| S | -5.653688 | -0.492285 | 0.304366  |
| H | -4.119588 | -0.915224 | -2.983110 |
| C | -4.517944 | 0.764939  | 0.575027  |
| C | -4.566708 | 1.949606  | -0.185986 |
| C | -3.676256 | 2.977649  | 0.058556  |
| C | -2.716280 | 2.843591  | 1.060141  |
| C | -2.640405 | 1.671681  | 1.808791  |
| C | -3.527627 | 0.638741  | 1.568218  |
| H | -4.119793 | -2.859321 | -1.468764 |
| H | -2.411601 | -3.091428 | 0.301992  |
| H | -2.369475 | 0.838602  | -2.757906 |
| H | 1.112778  | 0.306127  | 0.949171  |
| H | 1.302819  | -0.752855 | -0.464813 |
| H | 0.296864  | 1.115310  | -1.588441 |
| H | -0.605690 | 1.600516  | -0.148929 |
| H | 0.867053  | -2.070860 | 2.042041  |
| H | -0.690081 | -2.873895 | 1.829740  |
| H | 0.555299  | -3.014855 | 0.567621  |
| H | -5.317586 | 2.042054  | -0.960347 |
| H | -3.726518 | 3.887160  | -0.526098 |
| H | -2.021456 | 3.651669  | 1.252125  |
| H | -1.883975 | 1.566365  | 2.576013  |
| H | -3.475794 | -0.277997 | 2.141754  |

**Table S46.** The Cartesian Coordinates of **1a-σ**.

|   |           |           |           |
|---|-----------|-----------|-----------|
| N | -1.014333 | 0.807621  | -1.214104 |
| C | -0.184098 | 1.095982  | 0.033455  |
| C | -0.483570 | -0.034429 | 1.017881  |
| C | -1.244608 | -2.461952 | 0.390311  |
| C | -1.767855 | -3.262524 | -0.616501 |
| C | -2.049774 | -2.739621 | -1.878579 |
| C | -1.815697 | -1.400628 | -2.158741 |
| C | -1.286900 | -0.634994 | -1.137317 |
| C | -1.001772 | -1.121794 | 0.121377  |
| C | -0.275600 | 1.203143  | -2.453607 |
| S | -2.569127 | 1.767468  | -1.280006 |
| C | -3.270913 | 1.373912  | 0.280113  |
| C | -3.970261 | 0.178112  | 0.453951  |
| C | -4.507011 | -0.120027 | 1.696956  |
| C | -4.367975 | 0.781023  | 2.747409  |
| C | -3.696824 | 1.985046  | 2.564174  |
| C | -3.140691 | 2.284317  | 1.330077  |
| H | -3.603146 | 2.687062  | 3.381991  |

|   |           |           |           |
|---|-----------|-----------|-----------|
| H | -4.794500 | 0.546758  | 3.714455  |
| H | -5.042101 | -1.049058 | 1.842414  |
| H | -4.083343 | -0.507743 | -0.376640 |
| H | -2.607493 | 3.213537  | 1.173779  |
| H | -1.960764 | -4.309147 | -0.420430 |
| H | -2.457307 | -3.380195 | -2.648982 |
| H | -2.048875 | -0.981539 | -3.128833 |
| H | -1.030276 | -2.871865 | 1.368929  |
| H | 0.853709  | 1.057439  | -0.292308 |
| H | -0.421190 | 2.097133  | 0.381262  |
| H | -1.233649 | 0.247557  | 1.758495  |
| H | 0.421102  | -0.330366 | 1.546520  |
| H | -0.009452 | 2.253531  | -2.362153 |
| H | 0.612674  | 0.579683  | -2.519184 |
| H | -0.918481 | 1.046556  | -3.316063 |

**Table S47.** The Cartesian Coordinates of **TSr1**.

|   |            |           |           |
|---|------------|-----------|-----------|
| C | -8.631010  | 0.681494  | 0.699452  |
| C | -7.863254  | 0.597057  | -0.479391 |
| C | -6.898869  | -0.384903 | -0.636988 |
| C | -6.609954  | -1.214005 | 0.446956  |
| C | -7.268755  | -1.041850 | 1.682630  |
| C | -8.242466  | -0.097020 | 1.827899  |
| N | -5.682139  | -2.224189 | 0.531148  |
| C | -5.992031  | -3.027734 | 1.719801  |
| C | -6.684281  | -2.031178 | 2.660635  |
| C | -5.223466  | -2.913420 | -0.653369 |
| S | -9.617221  | 2.117955  | 1.057447  |
| C | -10.710466 | 2.353160  | -0.314368 |
| C | -11.486869 | 3.513984  | -0.246098 |
| C | -12.398551 | 3.807529  | -1.246575 |
| C | -12.547933 | 2.953175  | -2.334222 |
| C | -11.772871 | 1.805318  | -2.405097 |
| C | -10.854893 | 1.499971  | -1.405246 |
| H | -9.962190  | -0.410127 | 0.327788  |
| H | -8.063473  | 1.282251  | -1.292860 |
| H | -6.365525  | -0.477555 | -1.573740 |
| H | -8.772930  | 0.025225  | 2.764992  |
| H | -5.083704  | -3.460946 | 2.135460  |
| H | -6.676065  | -3.841918 | 1.445021  |
| H | -7.427957  | -2.503030 | 3.299208  |
| H | -5.948984  | -1.535036 | 3.299120  |
| H | -4.418625  | -3.593402 | -0.378006 |
| H | -4.834067  | -2.199347 | -1.377465 |



|   |            |           |           |
|---|------------|-----------|-----------|
| H | -6.029930  | -3.491616 | -1.122559 |
| H | -11.374069 | 4.185847  | 0.597039  |
| H | -12.993324 | 4.709423  | -1.175741 |
| H | -13.257714 | 3.183712  | -3.117776 |
| H | -11.874799 | 1.132150  | -3.247115 |
| H | -10.264614 | 0.599225  | -1.487879 |

**Table S48.** The Cartesian Coordinates of **HI**.

|   |           |          |          |
|---|-----------|----------|----------|
| I | -2.019822 | 0.940600 | 0.000000 |
| H | -3.636578 | 0.940600 | 0.000000 |

**Table S49.** The Cartesian Coordinates of **TSr2b**

|   |           |          |           |
|---|-----------|----------|-----------|
| N | 6.144942  | 4.828152 | -4.151069 |
| C | 4.978235  | 3.875472 | -4.292643 |
| C | 5.590811  | 2.516505 | -4.587870 |
| C | 8.045923  | 1.809188 | -4.998615 |
| C | 9.361678  | 2.275504 | -4.935780 |
| C | 9.675212  | 3.591577 | -4.554056 |
| C | 8.661644  | 4.500565 | -4.229737 |
| C | 7.333796  | 4.060077 | -4.293192 |
| C | 7.020014  | 2.703331 | -4.665909 |
| C | 6.061970  | 5.776570 | -3.016790 |
| C | 12.813952 | 1.261826 | -6.829650 |
| C | 13.547174 | 1.680196 | -7.943845 |
| C | 12.988411 | 2.580933 | -8.858229 |
| C | 11.690514 | 3.062842 | -8.661601 |
| C | 10.943976 | 2.646057 | -7.553641 |
| C | 11.515831 | 1.750991 | -6.649326 |
| S | 10.650342 | 1.118646 | -5.248686 |
| H | 10.718408 | 3.911855 | -4.508816 |
| H | 8.900949  | 5.521037 | -3.944598 |
| H | 7.816661  | 0.783786 | -5.290320 |
| H | 5.055352  | 1.798556 | -5.196268 |
| H | 5.422443  | 1.715284 | -3.330969 |
| H | 13.256005 | 0.565489 | -6.116721 |
| H | 14.557850 | 1.304968 | -8.098230 |
| H | 13.564714 | 2.905382 | -9.722514 |
| H | 11.255345 | 3.762585 | -9.373553 |
| H | 9.930222  | 3.019824 | -7.411419 |
| H | 5.136355  | 6.370289 | -3.107940 |
| H | 6.072544  | 5.291534 | -2.026240 |
| H | 6.909455  | 6.482209 | -3.064869 |
| H | 4.315005  | 3.870824 | -3.404837 |
| H | 4.369271  | 4.232257 | -5.155632 |

|   |          |          |           |
|---|----------|----------|-----------|
| I | 4.983637 | 0.969812 | -1.779832 |
|---|----------|----------|-----------|

**Table S50.** The Cartesian Coordinates of **TSr2a**.

|   |           |           |           |
|---|-----------|-----------|-----------|
| N | 5.898932  | 4.946883  | -4.251580 |
| C | 5.285089  | 3.881079  | -4.879032 |
| C | 6.309417  | 3.301287  | -5.827563 |
| C | 8.882525  | 3.432236  | -5.407851 |
| C | 9.854861  | 4.119269  | -4.670990 |
| C | 9.500737  | 5.175026  | -3.767511 |
| C | 8.208536  | 5.547797  | -3.577829 |
| C | 7.231041  | 4.839536  | -4.313551 |
| C | 7.574463  | 3.797560  | -5.227176 |
| C | 5.189309  | 5.813664  | -3.327998 |
| C | 12.004288 | 1.209384  | -5.496812 |
| C | 12.203289 | 0.199817  | -6.429747 |
| C | 12.089613 | 0.472913  | -7.786141 |
| C | 11.778329 | 1.757377  | -8.218970 |
| C | 11.590240 | 2.776071  | -7.296738 |
| C | 11.698575 | 2.492077  | -5.937914 |
| S | 11.542474 | 3.789779  | -4.742741 |
| H | 10.291222 | 5.673359  | -3.220333 |
| H | 7.942701  | 6.334486  | -2.885533 |
| H | 9.140579  | 2.621562  | -6.076113 |
| H | 6.160372  | 3.763356  | -6.812956 |
| H | 6.273357  | 2.219458  | -5.952522 |
| H | 12.083726 | 1.004730  | -4.436956 |
| H | 12.437759 | -0.801268 | -6.092658 |
| H | 12.238893 | -0.317894 | -8.509778 |
| H | 11.687946 | 1.968809  | -9.276333 |
| H | 11.360160 | 3.782403  | -7.623858 |
| H | 5.200785  | 5.330028  | -2.345844 |
| H | 5.688797  | 6.776675  | -3.274408 |
| H | 4.166751  | 5.929007  | -3.673955 |
| H | 5.321354  | 3.033511  | -3.937504 |
| H | 4.243691  | 4.021263  | -5.146985 |
| I | 7.920635  | -0.134415 | -6.786270 |
| I | 6.287352  | 1.900479  | -2.572951 |

**Table S51.** The Cartesian Coordinates of **1a-1-intb**.

|   |        |        |         |
|---|--------|--------|---------|
| N | 5.9818 | 5.2548 | -4.7913 |
| C | 5.2548 | 4.0032 | -5.1514 |
| C | 6.3036 | 3.0531 | -5.5911 |
| C | 9.0099 | 3.1110 | -5.0730 |
| C | 9.9782 | 3.7610 | -4.3651 |

|   |         |         |         |
|---|---------|---------|---------|
| C | 9.6271  | 5.0384  | -3.5459 |
| C | 8.3650  | 5.5528  | -3.5858 |
| C | 7.3276  | 4.8297  | -4.4475 |
| C | 7.5900  | 3.6821  | -5.0355 |
| C | 5.2713  | 6.0043  | -3.7452 |
| C | 12.9729 | 1.1555  | -5.9761 |
| C | 13.2197 | 0.5326  | -7.1541 |
| C | 12.4986 | 0.9930  | -8.4345 |
| C | 11.6171 | 2.0211  | -8.3833 |
| C | 11.3366 | 2.7290  | -7.0447 |
| C | 11.9712 | 2.3238  | -5.9179 |
| S | 11.6471 | 3.1420  | -4.3707 |
| H | 10.3798 | 5.5167  | -2.9545 |
| H | 8.1113  | 6.4382  | -3.0413 |
| H | 9.2337  | 2.2241  | -5.6282 |
| H | 6.2883  | 2.9329  | -6.6542 |
| H | 6.1723  | 1.5785  | -4.9141 |
| H | 13.4740 | 0.8356  | -5.0864 |
| H | 13.9157 | -0.2792 | -7.1945 |
| H | 12.6934 | 0.5012  | -9.3646 |
| H | 11.1160 | 2.3410  | -9.2730 |
| H | 10.6407 | 3.5407  | -7.0043 |
| H | 4.2953  | 6.2680  | -4.0957 |
| H | 5.1834  | 5.3970  | -2.8686 |
| H | 5.8180  | 6.8934  | -3.5097 |
| H | 4.4171  | 3.3899  | -3.8964 |
| H | 4.5522  | 4.2305  | -5.9258 |
| I | 5.6842  | -0.5096 | -3.7105 |
| I | 3.3399  | 2.1710  | -2.0502 |

**Table S52.** The Cartesian Coordinates of **1a-1-inta**.

|   |             |            |            |
|---|-------------|------------|------------|
| N | 5.71657899  | 4.74702225 | 4.79089778 |
| C | 5.17091949  | 3.38338888 | 5.05006161 |
| C | 6.33758881  | 2.53082268 | 5.33322738 |
| C | 8.98730303  | 2.97241236 | 4.73690315 |
| C | 9.83521914  | 3.80972325 | 4.06688462 |
| C | 9.29893109  | 5.11690295 | 3.40773373 |
| C | 7.99001627  | 5.46401382 | 3.55183446 |
| C | 7.08828011  | 4.52926128 | 4.36299164 |
| C | 7.51346384  | 3.36458910 | 4.81152821 |
| C | 4.88037366  | 5.49460936 | 3.84009528 |
| C | 13.18352176 | 1.42164665 | 5.23598529 |
| C | 13.56763387 | 0.70857063 | 6.32132981 |
| C | 12.87281665 | 0.93324941 | 7.67816177 |

|   |             |             |            |
|---|-------------|-------------|------------|
| C | 11.87360654 | 1.84028109  | 7.78473170 |
| C | 11.43655951 | 2.65064809  | 6.55062111 |
| C | 12.05376317 | 2.45762321  | 5.35997406 |
| S | 11.56068594 | 3.40179914  | 3.93683556 |
| H | 9.96127243  | 5.74709686  | 2.84400858 |
| H | 7.60740475  | 6.36520515  | 3.11940157 |
| H | 9.33921835  | 2.06617607  | 5.18676674 |
| H | 6.40125375  | 2.27530767  | 6.37008330 |
| H | 6.25777703  | 0.98170533  | 4.31085530 |
| H | 13.66530291 | 1.26555842  | 4.29233658 |
| H | 14.35368831 | -0.01060934 | 6.23588517 |
| H | 13.17889794 | 0.37278346  | 8.53675945 |
| H | 11.38890007 | 1.99313741  | 8.72600174 |
| H | 10.64637124 | 3.36585163  | 6.63299560 |
| H | 3.89395731  | 5.59980739  | 4.23975530 |
| H | 4.83617173  | 4.96253285  | 2.91105017 |
| H | 5.30452414  | 6.46567931  | 3.67526582 |
| H | 4.29059522  | 2.65490122  | 3.59694950 |
| H | 4.47811678  | 3.44854775  | 5.86402869 |
| I | 6.00037929  | -0.61202354 | 3.13027295 |
| I | 3.32832253  | 1.86616887  | 2.03108471 |

**Table S53.** The Cartesian Coordinates of **TSr3b**.

|   |            |           |           |
|---|------------|-----------|-----------|
| N | -8.086960  | 1.180902  | 2.894484  |
| C | -6.736531  | 0.839008  | 2.744538  |
| C | -6.667157  | -0.264286 | 1.868278  |
| C | -8.475267  | -1.319529 | 0.358402  |
| C | -9.806956  | -1.232942 | 0.063456  |
| C | -10.648690 | -0.287155 | 0.727253  |
| C | -10.173303 | 0.571750  | 1.674904  |
| C | -8.803986  | 0.474110  | 2.004646  |
| C | -7.949671  | -0.459923 | 1.353086  |
| C | -8.551177  | 2.340886  | 3.629787  |
| S | -10.516887 | -2.357390 | -1.104260 |
| C | -11.210644 | -1.261718 | -2.315206 |
| C | -12.289881 | -1.733444 | -3.060441 |
| C | -12.836746 | -0.944952 | -4.063265 |
| C | -12.325413 | 0.322063  | -4.316986 |
| C | -11.253905 | 0.791827  | -3.567323 |
| C | -10.688348 | 0.003279  | -2.574315 |
| H | -11.696911 | -0.255911 | 0.456042  |
| H | -10.821812 | 1.288539  | 2.159831  |
| H | -7.832252  | -2.021571 | -0.156496 |
| H | -6.039673  | 1.092620  | 3.532553  |

|   |            |           |           |
|---|------------|-----------|-----------|
| H | -6.401125  | 1.701927  | 1.773948  |
| H | -5.757796  | -0.771917 | 1.586427  |
| H | -9.545942  | 2.144136  | 4.023493  |
| H | -8.578127  | 3.214317  | 2.974841  |
| H | -7.868491  | 2.525480  | 4.455541  |
| H | -12.701460 | -2.713521 | -2.851648 |
| H | -13.673172 | -1.320206 | -4.639159 |
| H | -12.759527 | 0.939349  | -5.092575 |
| H | -10.846278 | 1.776335  | -3.759123 |
| H | -9.842906  | 0.372309  | -2.007320 |
| I | -6.429635  | 3.203251  | 0.453550  |

**Table S54.** The Cartesian Coordinates of **TSr3a**.

|   |           |          |          |
|---|-----------|----------|----------|
| N | 5.765698  | 4.835941 | 5.141567 |
| C | 4.933244  | 3.853869 | 5.510342 |
| C | 5.547755  | 2.609653 | 5.356913 |
| C | 7.887052  | 2.085387 | 4.316156 |
| C | 9.031201  | 2.707866 | 3.844917 |
| C | 9.125177  | 4.110475 | 3.773728 |
| C | 8.081905  | 4.918209 | 4.180407 |
| C | 6.937152  | 4.281054 | 4.651047 |
| C | 6.817997  | 2.883381 | 4.720656 |
| C | 5.525021  | 6.263065 | 5.267314 |
| C | 12.685460 | 1.107142 | 4.650912 |
| C | 13.522113 | 0.998220 | 5.750940 |
| C | 13.104650 | 1.445911 | 6.999848 |
| C | 11.839892 | 2.000847 | 7.136351 |
| C | 10.990477 | 2.110015 | 6.041058 |
| C | 11.412975 | 1.663054 | 4.792783 |
| S | 10.410764 | 1.721331 | 3.328324 |
| H | 10.038157 | 4.555581 | 3.400477 |
| H | 8.156968  | 5.996876 | 4.137944 |
| H | 7.835363  | 1.005956 | 4.380730 |
| H | 6.094955  | 2.680470 | 6.775505 |
| H | 5.039613  | 1.659503 | 5.409773 |
| H | 13.017820 | 0.762295 | 3.678725 |
| H | 14.506774 | 0.564690 | 5.629053 |
| H | 13.760586 | 1.363325 | 7.856510 |
| H | 11.501011 | 2.352544 | 8.102934 |
| H | 10.005132 | 2.539486 | 6.168805 |
| H | 5.594467  | 6.733700 | 4.287644 |
| H | 6.264731  | 6.702517 | 5.935491 |
| H | 4.529334  | 6.411484 | 5.675422 |
| H | 3.966310  | 4.087203 | 5.930497 |

|   |          |          |          |
|---|----------|----------|----------|
| I | 7.008297 | 2.777553 | 8.374779 |
|---|----------|----------|----------|

**Table S55.** The Cartesian Coordinates of **1a-2**.

|   |            |           |           |
|---|------------|-----------|-----------|
| C | -9.151870  | -0.066232 | -1.337394 |
| C | -7.937960  | -0.225148 | -0.635342 |
| C | -7.718956  | -1.322833 | 0.169108  |
| C | -8.737248  | -2.276506 | 0.250528  |
| C | -9.958116  | -2.142613 | -0.452963 |
| C | -10.158756 | -1.010692 | -1.252119 |
| S | -9.375180  | 1.353354  | -2.373530 |
| N | -8.782991  | -3.446144 | 0.954992  |
| C | -9.991907  | -4.051460 | 0.718620  |
| C | -10.744286 | -3.295077 | -0.133830 |
| C | -7.725671  | -3.947272 | 1.807537  |
| C | -9.715502  | 2.653083  | -1.215905 |
| C | -9.718779  | 3.954478  | -1.721078 |
| C | -10.002430 | 5.024529  | -0.886282 |
| C | -10.278110 | 4.812308  | 0.460297  |
| C | -10.271300 | 3.517264  | 0.960543  |
| C | -9.995150  | 2.436860  | 0.130397  |
| H | -7.173548  | 0.535218  | -0.732297 |
| H | -6.788845  | -1.441500 | 0.710338  |
| H | -11.085509 | -0.869912 | -1.794571 |
| H | -10.217499 | -4.994652 | 1.191567  |
| H | -11.733548 | -3.530369 | -0.489544 |
| H | -7.534932  | -3.252870 | 2.626447  |
| H | -8.034687  | -4.905594 | 2.216844  |
| H | -6.808063  | -4.082580 | 1.234300  |
| H | -9.495773  | 4.125818  | -2.767693 |
| H | -10.001769 | 6.029078  | -1.290309 |
| H | -10.494078 | 5.648687  | 1.112017  |
| H | -10.485384 | 3.338599  | 2.006911  |
| H | -9.999454  | 1.432176  | 0.532412  |

**Table S56.** The Cartesian Coordinates of **1a-2π<sup>+</sup>**.

|   |           |           |           |
|---|-----------|-----------|-----------|
| C | -5.831109 | 0.403568  | -0.888843 |
| C | -5.393026 | 0.566314  | 0.526307  |
| C | -5.244001 | -0.661348 | 1.329059  |
| C | -5.172290 | -1.829173 | 0.676170  |
| C | -5.398796 | -1.949137 | -0.747373 |
| C | -5.800172 | -0.805602 | -1.497288 |
| N | -4.849396 | -3.099589 | 1.150511  |
| C | -4.852584 | -3.933705 | 0.118681  |
| C | -5.194776 | -3.273161 | -1.077385 |

|   |           |           |           |
|---|-----------|-----------|-----------|
| C | -4.514200 | -3.407914 | 2.531076  |
| S | -6.184289 | 1.808962  | -1.865479 |
| C | -6.651685 | 3.037065  | -0.670101 |
| C | -5.794940 | 4.101572  | -0.410438 |
| C | -6.176789 | 5.083016  | 0.496199  |
| C | -7.401936 | 4.994504  | 1.144216  |
| C | -8.256390 | 3.929500  | 0.880021  |
| C | -7.888927 | 2.953473  | -0.034977 |
| H | -5.950009 | 1.336232  | 1.060500  |
| H | -5.091728 | -0.562752 | 2.396819  |
| H | -6.067298 | -0.914436 | -2.541098 |
| H | -4.611570 | -4.977352 | 0.263989  |
| H | -5.277259 | -3.738825 | -2.044863 |
| H | -5.359609 | -3.168724 | 3.173874  |
| H | -4.287747 | -4.467901 | 2.599840  |
| H | -3.645241 | -2.823641 | 2.831563  |
| H | -4.837131 | 4.156791  | -0.911364 |
| H | -5.512484 | 5.913215  | 0.697853  |
| H | -7.694352 | 5.757917  | 1.853604  |
| H | -9.214122 | 3.862874  | 1.379572  |
| H | -8.553367 | 2.127269  | -0.255767 |
| C | -2.750913 | 0.066730  | -0.337758 |
| C | -2.146129 | -0.990423 | 0.343771  |
| C | -1.459258 | -1.966597 | -0.362726 |
| C | -1.369881 | -1.886910 | -1.748662 |
| C | -1.958917 | -0.827270 | -2.428050 |
| C | -2.650931 | 0.150364  | -1.725829 |
| S | -3.651195 | 1.297902  | 0.555371  |
| H | -2.220623 | -1.043321 | 1.423304  |
| H | -0.991661 | -2.786126 | 0.167691  |
| H | -0.833453 | -2.649122 | -2.299285 |
| H | -1.881839 | -0.761273 | -3.505483 |
| H | -3.118377 | 0.976934  | -2.247221 |

**Table S57.** The Cartesian Coordinates of **1a-2σ<sup>+</sup>**.

|   |           |           |           |
|---|-----------|-----------|-----------|
| C | -8.679641 | 0.086889  | -0.497405 |
| C | -9.247143 | -1.184374 | -0.326500 |
| C | -8.461450 | -2.310452 | -0.138902 |
| C | -7.095376 | -2.111859 | -0.130732 |
| C | -6.511536 | -0.865955 | -0.302073 |
| C | -7.292840 | 0.256094  | -0.484688 |
| N | -6.055851 | -3.071067 | 0.041761  |
| C | -4.900541 | -2.507834 | -0.027138 |

|   |            |           |           |
|---|------------|-----------|-----------|
| C | -5.024942  | -1.038645 | -0.216705 |
| C | -6.320916  | -4.482631 | 0.297234  |
| S | -9.820425  | 1.413178  | -0.732243 |
| C | -8.765023  | 2.838249  | -0.763039 |
| C | -8.406787  | 3.458570  | 0.431019  |
| C | -7.588383  | 4.579592  | 0.405003  |
| C | -7.134952  | 5.082797  | -0.808957 |
| C | -7.500415  | 4.466760  | -1.999545 |
| C | -8.316279  | 3.342665  | -1.979963 |
| S | -4.394328  | -0.233232 | 1.312023  |
| C | -2.649780  | -0.508821 | 1.117870  |
| C | -2.013054  | -1.475078 | 1.891411  |
| C | -0.641573  | -1.659742 | 1.769019  |
| C | 0.087262   | -0.887759 | 0.873720  |
| C | -0.551357  | 0.076317  | 0.101197  |
| C | -1.918740  | 0.273148  | 0.225752  |
| H | -10.325000 | -1.288192 | -0.337284 |
| H | -8.906730  | -3.287207 | -0.005162 |
| H | -6.840927  | 1.230836  | -0.612253 |
| H | -3.983011  | -3.070102 | 0.088475  |
| H | -4.463303  | -0.668289 | -1.074608 |
| H | -6.888011  | -4.882590 | -0.541097 |
| H | -5.373750  | -5.002462 | 0.402271  |
| H | -6.907104  | -4.560351 | 1.211221  |
| H | -8.766805  | 3.061411  | 1.371761  |
| H | -7.308679  | 5.061706  | 1.332754  |
| H | -6.498995  | 5.958514  | -0.826657 |
| H | -7.151379  | 4.859963  | -2.945566 |
| H | -8.604063  | 2.854859  | -2.902579 |
| H | -2.589636  | -2.075068 | 2.584188  |
| H | -0.145121  | -2.408421 | 2.372570  |
| H | 1.155435   | -1.034527 | 0.778813  |
| H | 0.017150   | 0.681808  | -0.592613 |
| H | -2.421402  | 1.031402  | -0.362252 |

**Table S58.** The Cartesian Coordinates of TSe2.

|   |            |          |           |
|---|------------|----------|-----------|
| C | -10.628868 | 1.878305 | 0.224813  |
| C | -11.067448 | 2.454310 | -0.982436 |
| C | -10.229092 | 2.563412 | -2.076431 |
| C | -8.942827  | 2.057185 | -1.936853 |
| C | -8.488543  | 1.501442 | -0.736352 |
| C | -9.327518  | 1.420977 | 0.366204  |
| N | -7.911371  | 1.967264 | -2.871702 |
| C | -6.861903  | 1.369155 | -2.318398 |



|   |            |           |           |
|---|------------|-----------|-----------|
| C | -7.099110  | 1.132846  | -0.947533 |
| C | -7.996289  | 2.481656  | -4.229084 |
| S | -6.161226  | 0.081173  | 0.101734  |
| S | -11.806187 | 1.796057  | 1.548569  |
| H | -6.510592  | 2.428523  | -0.527802 |
| C | -7.116477  | -1.415657 | 0.119903  |
| C | -6.858688  | -2.297022 | 1.170123  |
| C | -7.532811  | -3.507022 | 1.241040  |
| C | -8.478820  | -3.840934 | 0.278592  |
| C | -8.740520  | -2.956604 | -0.759368 |
| C | -8.059843  | -1.747573 | -0.847525 |
| C | -11.223394 | 0.399730  | 2.477315  |
| C | -11.093724 | -0.851439 | 1.874208  |
| C | -10.652358 | -1.933146 | 2.619267  |
| C | -10.359329 | -1.779175 | 3.972006  |
| C | -10.504745 | -0.538073 | 4.573945  |
| C | -10.928031 | 0.556652  | 3.826247  |
| H | -12.089746 | 2.802708  | -1.058388 |
| H | -10.574727 | 3.002531  | -3.003020 |
| H | -8.973180  | 0.990128  | 1.294582  |
| H | -5.954170  | 1.199224  | -2.879328 |
| H | -7.071136  | 2.246743  | -4.747123 |
| H | -8.836223  | 2.012646  | -4.739207 |
| H | -8.141870  | 3.560550  | -4.200877 |
| H | -6.133451  | -2.032418 | 1.930669  |
| H | -7.325488  | -4.184782 | 2.059504  |
| H | -9.012457  | -4.780373 | 0.341573  |
| H | -9.476391  | -3.205787 | -1.513503 |
| H | -8.265578  | -1.074172 | -1.669949 |
| H | -11.327924 | -0.970056 | 0.822945  |
| H | -10.541625 | -2.899638 | 2.144518  |
| H | -10.018672 | -2.627496 | 4.551780  |
| H | -10.276871 | -0.411590 | 5.624530  |
| H | -11.020512 | 1.531980  | 4.286735  |
| I | -5.895230  | 4.035575  | 0.165310  |

**Table S59.** The Cartesian Coordinates of **3aa**.

|   |           |           |           |
|---|-----------|-----------|-----------|
| C | -7.690496 | -0.252270 | -1.133020 |
| C | -6.666571 | -0.947981 | -0.461813 |
| C | -6.922434 | -2.124839 | 0.217609  |
| C | -8.239145 | -2.580311 | 0.237275  |
| C | -9.276503 | -1.887067 | -0.423110 |
| C | -8.993240 | -0.720637 | -1.130251 |
| N | -8.787283 | -3.679714 | 0.851159  |

|   |            |           |           |
|---|------------|-----------|-----------|
| C | -10.132038 | -3.686915 | 0.617456  |
| C | -10.483583 | -2.615962 | -0.162728 |
| C | -8.045796  | -4.654591 | 1.625006  |
| S | -12.078825 | -2.222119 | -0.741601 |
| S | -7.250780  | 1.209061  | -2.038678 |
| C | -12.438542 | -0.703829 | 0.110241  |
| C | -11.747814 | -0.279764 | 1.241897  |
| C | -12.100806 | 0.913604  | 1.859678  |
| C | -13.142524 | 1.686607  | 1.363091  |
| C | -13.832925 | 1.258265  | 0.235093  |
| C | -13.481828 | 0.072247  | -0.394082 |
| C | -8.447455  | 2.403535  | -1.501859 |
| C | -8.788834  | 3.410889  | -2.402080 |
| C | -9.675612  | 4.410755  | -2.023991 |
| C | -10.239628 | 4.404364  | -0.754827 |
| C | -9.900601  | 3.395648  | 0.140187  |
| C | -9.002735  | 2.401952  | -0.223550 |
| H | -5.661962  | -0.545537 | -0.477031 |
| H | -6.130066  | -2.655695 | 0.729529  |
| H | -9.780239  | -0.186541 | -1.651023 |
| H | -10.754181 | -4.467919 | 1.027166  |
| H | -7.557806  | -4.171655 | 2.471861  |
| H | -8.739435  | -5.406158 | 1.992456  |
| H | -7.290500  | -5.135411 | 1.003053  |
| H | -10.937880 | -0.877120 | 1.640337  |
| H | -11.553946 | 1.238050  | 2.736470  |
| H | -13.411043 | 2.616713  | 1.846944  |
| H | -14.644600 | 1.852856  | -0.164830 |
| H | -14.013485 | -0.250807 | -1.281447 |
| H | -8.366771  | 3.405986  | -3.399730 |
| H | -9.934967  | 5.187993  | -2.731664 |
| H | -10.939693 | 5.177111  | -0.464996 |
| H | -10.333193 | 3.381967  | 1.132649  |
| H | -8.739038  | 1.625239  | 0.483254  |

**Table S60.** The Cartesian Coordinates of **C4-I**.

|   |           |           |           |
|---|-----------|-----------|-----------|
| C | -1.402398 | -0.646017 | -0.808487 |
| C | -1.289262 | -2.003508 | -0.711912 |
| C | -0.031386 | -2.615542 | -0.588133 |
| C | 1.140473  | -1.848549 | -0.580653 |
| C | 1.053732  | -0.470280 | -0.666656 |
| C | -0.221864 | 0.211689  | -0.742252 |
| N | 2.448470  | -2.260649 | -0.523430 |

|   |           |           |           |
|---|-----------|-----------|-----------|
| C | 3.269988  | -1.091754 | -0.173363 |
| C | 2.425877  | 0.103703  | -0.646199 |
| C | 2.804753  | -3.541611 | 0.050145  |
| S | -0.389934 | 0.924620  | 1.026035  |
| C | -1.855329 | 1.899499  | 0.862571  |
| C | -1.809472 | 3.111987  | 0.175831  |
| C | -2.946338 | 3.902278  | 0.107779  |
| C | -4.117474 | 3.492261  | 0.736548  |
| C | -4.157814 | 2.287838  | 1.428318  |
| C | -3.029052 | 1.482292  | 1.486387  |
| H | -2.370207 | -0.167608 | -0.881487 |
| H | -2.174688 | -2.623655 | -0.709411 |
| H | 0.022761  | -3.693295 | -0.490184 |
| H | -0.229752 | 1.087837  | -1.390809 |
| H | 4.241419  | -1.148093 | -0.659210 |
| H | 3.416956  | -1.055284 | 0.912603  |
| H | 2.508047  | 0.986969  | -0.011308 |
| H | 2.690048  | 0.407043  | -1.666154 |
| H | 2.257572  | -4.340715 | -0.447521 |
| H | 3.868480  | -3.709392 | -0.107803 |
| H | 2.595075  | -3.575934 | 1.125900  |
| H | -0.888044 | 3.429902  | -0.296584 |
| H | -2.915971 | 4.842425  | -0.427155 |
| H | -5.001176 | 4.115367  | 0.687642  |
| H | -5.069162 | 1.971270  | 1.918325  |
| H | -3.051928 | 0.535304  | 2.010724  |

**Table S61.** The Cartesian Coordinates of C4-II.

|   |           |           |           |
|---|-----------|-----------|-----------|
| C | -1.500986 | -0.803763 | 0.409797  |
| C | -1.324681 | -2.103569 | 0.030030  |
| C | -0.043830 | -2.678596 | -0.000516 |
| C | 1.082909  | -1.938052 | 0.378577  |
| C | 0.933964  | -0.614819 | 0.755322  |
| C | -0.358368 | 0.039252  | 0.752080  |
| N | 2.393766  | -2.334863 | 0.468199  |
| C | 3.223491  | -1.122776 | 0.545734  |
| C | 2.267042  | -0.059820 | 1.112283  |
| C | 2.891130  | -3.454823 | -0.303187 |
| S | -0.238622 | 1.141806  | -0.807772 |
| C | -1.744808 | 2.058621  | -0.684669 |
| C | -2.780599 | 1.802513  | -1.580354 |
| C | -3.933233 | 2.574030  | -1.531160 |
| C | -4.055535 | 3.581723  | -0.582192 |
| C | -3.022453 | 3.830275  | 0.315484  |

|   |           |           |           |
|---|-----------|-----------|-----------|
| C | -1.861158 | 3.075086  | 0.262373  |
| H | -2.482866 | -0.349119 | 0.415441  |
| H | -2.173422 | -2.701175 | -0.271879 |
| H | 0.065020  | -3.705313 | -0.329444 |
| H | -0.513398 | 0.744513  | 1.568705  |
| H | 3.561725  | -0.841541 | -0.458613 |
| H | 4.093222  | -1.294632 | 1.175784  |
| H | 2.334659  | 0.004452  | 2.204678  |
| H | 2.430406  | 0.943196  | 0.715781  |
| H | 2.291363  | -4.341936 | -0.105454 |
| H | 2.878590  | -3.243027 | -1.379007 |
| H | 3.914526  | -3.661676 | 0.004100  |
| H | -2.679340 | 1.005758  | -2.306447 |
| H | -4.737344 | 2.383100  | -2.229656 |
| H | -4.958580 | 4.177128  | -0.542091 |
| H | -3.118170 | 4.618000  | 1.051152  |
| H | -1.044521 | 3.270248  | 0.946723  |

**Table S62.** The Cartesian Coordinates of **C4-III**.

|   |           |           |           |
|---|-----------|-----------|-----------|
| C | -0.895487 | 1.365581  | -0.009063 |
| C | -1.886378 | 1.435981  | 0.927919  |
| C | -2.621535 | 0.295438  | 1.289216  |
| C | -2.345645 | -0.946336 | 0.704442  |
| C | -1.384597 | -1.034561 | -0.288655 |
| C | -0.553977 | 0.096555  | -0.645551 |
| N | -2.920556 | -2.168720 | 0.948841  |
| C | -2.596919 | -3.047360 | -0.184889 |
| C | -1.304950 | -2.442725 | -0.760293 |
| C | -4.243535 | -2.267169 | 1.530155  |
| S | 1.069496  | -0.343073 | 0.277991  |
| C | 2.133434  | 0.970195  | -0.235054 |
| C | 2.683409  | 0.955976  | -1.516102 |
| C | 3.568380  | 1.955594  | -1.890736 |
| C | 3.912291  | 2.954908  | -0.986694 |
| C | 3.368325  | 2.962365  | 0.292588  |
| C | 2.470874  | 1.974182  | 0.670632  |
| H | -0.315862 | 2.238329  | -0.278995 |
| H | -2.114084 | 2.378055  | 1.406922  |
| H | -3.405311 | 0.386147  | 2.031737  |
| H | -0.268639 | 0.148063  | -1.695417 |
| H | -2.478353 | -4.075630 | 0.149046  |
| H | -3.402424 | -3.004619 | -0.927310 |
| H | -1.212412 | -2.535317 | -1.841223 |
| H | -0.412468 | -2.901819 | -0.312490 |

|   |           |           |           |
|---|-----------|-----------|-----------|
| H | -4.276195 | -1.737544 | 2.481138  |
| H | -5.010510 | -1.857660 | 0.862003  |
| H | -4.462471 | -3.316580 | 1.718052  |
| H | 2.419297  | 0.165193  | -2.207452 |
| H | 3.995690  | 1.950276  | -2.884847 |
| H | 4.607948  | 3.730389  | -1.280548 |
| H | 3.638170  | 3.740102  | 0.994876  |
| H | 2.030691  | 1.975887  | 1.659863  |

**Table S63.** The Cartesian Coordinates of **C4-IV**.

|   |           |           |           |
|---|-----------|-----------|-----------|
| C | -0.463538 | 1.058249  | 1.115533  |
| C | -1.713120 | 1.284931  | 1.617988  |
| C | -2.666765 | 0.255711  | 1.672626  |
| C | -2.351878 | -1.035753 | 1.231916  |
| C | -1.094954 | -1.290917 | 0.711068  |
| C | -0.095993 | -0.250205 | 0.581690  |
| N | -3.120841 | -2.172548 | 1.251741  |
| C | -2.489056 | -3.154779 | 0.357380  |
| C | -1.012533 | -2.725490 | 0.326204  |
| C | -4.567020 | -2.097877 | 1.266735  |
| S | -0.157938 | 0.095248  | -1.301813 |
| C | 1.147062  | 1.272916  | -1.481549 |
| C | 0.835557  | 2.600318  | -1.768385 |
| C | 1.859194  | 3.510424  | -1.990814 |
| C | 3.184413  | 3.099636  | -1.909476 |
| C | 3.492321  | 1.775562  | -1.615123 |
| C | 2.475330  | 0.856055  | -1.408357 |
| H | 0.266778  | 1.853897  | 1.050769  |
| H | -1.989157 | 2.271783  | 1.962393  |
| H | -3.657173 | 0.475499  | 2.053068  |
| H | 0.928380  | -0.573085 | 0.766825  |
| H | -2.632649 | -4.164310 | 0.735835  |
| H | -2.933428 | -3.083437 | -0.642455 |
| H | -0.524222 | -2.879856 | -0.637028 |
| H | -0.421217 | -3.254967 | 1.082423  |
| H | -4.903297 | -1.491616 | 2.106443  |
| H | -4.959772 | -1.673946 | 0.334866  |
| H | -4.965376 | -3.102869 | 1.393106  |
| H | -0.200492 | 2.911243  | -1.815779 |
| H | 1.621134  | 4.540552  | -2.221200 |
| H | 3.981156  | 3.813050  | -2.076381 |
| H | 4.524836  | 1.457146  | -1.555627 |
| H | 2.705159  | -0.180567 | -1.194320 |

**Table S64.** The Cartesian Coordinates of **C5-I**.

---

|   |           |           |           |
|---|-----------|-----------|-----------|
| C | -4.055867 | -0.356420 | -0.477154 |
| C | -4.166459 | -1.831670 | -0.616383 |
| C | -3.120743 | -2.664160 | -0.550354 |
| C | -1.816470 | -2.088567 | -0.348181 |
| C | -1.629145 | -0.654524 | -0.236320 |
| C | -2.675758 | 0.166044  | -0.307905 |
| N | -0.682892 | -2.709448 | -0.239610 |
| C | 0.457811  | -1.800466 | -0.015896 |
| C | -0.157141 | -0.392199 | -0.043817 |
| C | -0.438205 | -4.138712 | -0.293512 |
| S | -5.093682 | 0.115575  | 0.985021  |
| C | -5.201332 | 1.869387  | 0.728980  |
| C | -4.576677 | 2.729763  | 1.627179  |
| C | -4.693186 | 4.104783  | 1.461171  |
| C | -5.417040 | 4.618457  | 0.393587  |
| C | -6.035404 | 3.757223  | -0.506983 |
| C | -5.938014 | 2.384270  | -0.336148 |
| H | -4.546372 | 0.115537  | -1.334560 |
| H | -5.163919 | -2.227357 | -0.768332 |
| H | -3.246946 | -3.732166 | -0.650245 |
| H | -2.557405 | 1.240876  | -0.225528 |
| H | 1.189668  | -1.972938 | -0.804256 |
| H | 0.909506  | -2.057501 | 0.942330  |
| H | 0.031230  | 0.145249  | 0.883420  |
| H | 0.244569  | 0.198320  | -0.865437 |
| H | -1.350384 | -4.673629 | -0.533645 |
| H | 0.314433  | -4.329978 | -1.057709 |
| H | -0.057104 | -4.465628 | 0.673958  |
| H | -4.002684 | 2.322223  | 2.449648  |
| H | -4.210789 | 4.772044  | 2.163696  |
| H | -5.502470 | 5.689474  | 0.262581  |
| H | -6.605166 | 4.155451  | -1.336621 |
| H | -6.436163 | 1.710690  | -1.023077 |

---

**Table S65.** The Cartesian Coordinates of **C5-II**.

---

|   |           |           |          |
|---|-----------|-----------|----------|
| C | -2.457643 | -0.396415 | 0.197553 |
| C | -2.572258 | -1.877161 | 0.149393 |
| C | -1.522437 | -2.705160 | 0.204488 |
| C | -0.212522 | -2.120771 | 0.332911 |
| C | -0.028884 | -0.685017 | 0.429863 |
| C | -1.080475 | 0.130615  | 0.376531 |
| N | 0.929401  | -2.733814 | 0.380146 |
| C | 2.075989  | -1.815567 | 0.521613 |

---

|   |           |           |           |
|---|-----------|-----------|-----------|
| C | 1.447557  | -0.413672 | 0.567331  |
| C | 1.182955  | -4.160790 | 0.308116  |
| S | -3.176639 | 0.240193  | -1.388659 |
| C | -3.378894 | 1.953610  | -0.968467 |
| C | -4.337683 | 2.344191  | -0.035327 |
| C | -4.504087 | 3.688959  | 0.260527  |
| C | -3.731071 | 4.647079  | -0.387076 |
| C | -2.784332 | 4.258005  | -1.325203 |
| C | -2.600047 | 2.910654  | -1.612357 |
| H | -3.123022 | -0.017646 | 0.979857  |
| H | -3.574051 | -2.279612 | 0.054582  |
| H | -1.650367 | -3.776930 | 0.164385  |
| H | -0.964474 | 1.206956  | 0.440481  |
| H | 2.737911  | -1.967742 | -0.330658 |
| H | 2.612401  | -2.082495 | 1.431860  |
| H | 1.668636  | 0.090006  | 1.506626  |
| H | 1.809817  | 0.212059  | -0.246104 |
| H | 0.254855  | -4.708734 | 0.189031  |
| H | 1.839001  | -4.352881 | -0.540632 |
| H | 1.684129  | -4.471561 | 1.224584  |
| H | -4.952950 | 1.596926  | 0.451415  |
| H | -5.246786 | 3.990033  | 0.988035  |
| H | -3.869525 | 5.696401  | -0.160608 |
| H | -2.181280 | 5.000875  | -1.831088 |
| H | -1.854625 | 2.599508  | -2.333147 |

**Table S66.** The Cartesian Coordinates of **C5-III**.

|   |           |           |           |
|---|-----------|-----------|-----------|
| C | -3.895432 | -0.381358 | -0.391400 |
| C | -4.001944 | -1.861541 | -0.467362 |
| C | -2.948278 | -2.685127 | -0.419159 |
| C | -1.639563 | -2.095466 | -0.304343 |
| C | -1.458276 | -0.657332 | -0.246916 |
| C | -2.512954 | 0.154224  | -0.300195 |
| N | -0.496349 | -2.705038 | -0.243097 |
| C | 0.649041  | -1.781239 | -0.131309 |
| C | 0.018457  | -0.379639 | -0.126029 |
| C | -0.241277 | -4.133239 | -0.273487 |
| S | -4.879881 | 0.145007  | 1.088662  |
| C | -5.011147 | 1.885725  | 0.762432  |
| C | -4.359121 | 2.787932  | 1.597759  |
| C | -4.492417 | 4.153700  | 1.377286  |
| C | -5.260668 | 4.616348  | 0.317321  |
| C | -5.906693 | 3.713290  | -0.520565 |
| C | -5.792369 | 2.349614  | -0.294513 |

|   |           |           |           |
|---|-----------|-----------|-----------|
| H | -4.422195 | 0.052898  | -1.247366 |
| H | -5.002392 | -2.268142 | -0.558556 |
| H | -3.071252 | -3.756750 | -0.474392 |
| H | -2.398896 | 1.231970  | -0.259892 |
| H | 1.187440  | -2.019206 | 0.785847  |
| H | 1.309985  | -1.958741 | -0.979373 |
| H | 0.376141  | 0.221206  | -0.960052 |
| H | 0.242670  | 0.153155  | 0.796243  |
| H | -1.167247 | -4.684555 | -0.393346 |
| H | 0.428396  | -4.346224 | -1.106362 |
| H | 0.245131  | -4.420567 | 0.658546  |
| H | -3.751004 | 2.419739  | 2.414256  |
| H | -3.988558 | 4.853650  | 2.031226  |
| H | -5.359037 | 5.680170  | 0.143675  |
| H | -6.511008 | 4.071809  | -1.343874 |
| H | -6.311403 | 1.643726  | -0.931764 |

**Table S67.** The Cartesian Coordinates of **C5-IV**.

|   |           |           |           |
|---|-----------|-----------|-----------|
| C | -2.424862 | -0.384261 | 0.271763  |
| C | -2.541863 | -1.865407 | 0.299713  |
| C | -1.490425 | -2.692300 | 0.339272  |
| C | -0.175909 | -2.105809 | 0.372884  |
| C | 0.013020  | -0.667532 | 0.385542  |
| C | -1.039907 | 0.147341  | 0.348403  |
| N | 0.966646  | -2.719057 | 0.397527  |
| C | 2.119245  | -1.798483 | 0.434784  |
| C | 1.494801  | -0.394051 | 0.432359  |
| C | 1.215531  | -4.148696 | 0.391468  |
| S | -3.233749 | 0.179882  | -1.298942 |
| C | -3.405375 | 1.912133  | -0.948221 |
| C | -4.316940 | 2.351962  | 0.009963  |
| C | -4.459753 | 3.709894  | 0.253433  |
| C | -3.710143 | 4.631415  | -0.470418 |
| C | -2.810623 | 4.192974  | -1.432778 |
| C | -2.650186 | 2.832661  | -1.668891 |
| H | -3.045495 | 0.032485  | 1.071402  |
| H | -3.547358 | -2.269059 | 0.276233  |
| H | -1.620142 | -3.764485 | 0.356320  |
| H | -0.920864 | 1.225251  | 0.352723  |
| H | 2.698366  | -2.016878 | 1.331739  |
| H | 2.740843  | -1.998746 | -0.437659 |
| H | 1.815483  | 0.182053  | -0.433572 |
| H | 1.763600  | 0.162605  | 1.328211  |
| H | 0.282783  | -4.699381 | 0.341655  |



|   |           |           |           |
|---|-----------|-----------|-----------|
| H | 1.834945  | -4.387794 | -0.472717 |
| H | 1.755119  | -4.411600 | 1.301187  |
| H | -4.913492 | 1.631991  | 0.557293  |
| H | -5.165742 | 4.049385  | 1.000311  |
| H | -3.830116 | 5.690894  | -0.284254 |
| H | -2.226014 | 4.907432  | -1.997763 |
| H | -1.941421 | 2.483279  | -2.408870 |

**Table S68.** The Cartesian Coordinates of **C6-I**.

|   |           |           |           |
|---|-----------|-----------|-----------|
| C | -2.640748 | 2.421228  | -0.293383 |
| C | -2.563973 | 0.963473  | -0.385863 |
| C | -1.245191 | 0.359455  | -0.566213 |
| C | -0.140652 | 1.160361  | -0.608191 |
| C | -0.282264 | 2.565081  | -0.436590 |
| C | -1.522094 | 3.197770  | -0.297380 |
| N | 1.182712  | 0.841993  | -0.761477 |
| C | 2.001911  | 1.961713  | -0.285536 |
| C | 1.072291  | 3.170941  | -0.454841 |
| C | 1.637097  | -0.511753 | -0.533074 |
| S | -3.282728 | 0.388718  | 1.268338  |
| C | -3.366159 | -1.354153 | 0.964876  |
| C | -4.398516 | -1.879994 | 0.190047  |
| C | -4.479879 | -3.250562 | -0.005539 |
| C | -3.542204 | -4.094573 | 0.580129  |
| C | -2.517774 | -3.569525 | 1.357778  |
| C | -2.422972 | -2.197075 | 1.547634  |
| H | -3.625188 | 2.861181  | -0.186027 |
| H | -3.298312 | 0.592043  | -1.110048 |
| H | -1.180216 | -0.719448 | -0.628792 |
| H | -1.577598 | 4.272504  | -0.188512 |
| H | 2.265347  | 1.820358  | 0.768736  |
| H | 2.916228  | 2.041476  | -0.869353 |
| H | 1.199127  | 3.634234  | -1.442038 |
| H | 1.197971  | 3.954556  | 0.290630  |
| H | 1.094553  | -1.199802 | -1.180774 |
| H | 2.695955  | -0.572892 | -0.776014 |
| H | 1.489887  | -0.813740 | 0.511186  |
| H | -5.131950 | -1.216236 | -0.251257 |
| H | -5.280012 | -3.660550 | -0.607899 |
| H | -3.612089 | -5.164340 | 0.430598  |
| H | -1.789342 | -4.226478 | 1.814916  |
| H | -1.623018 | -1.776264 | 2.143934  |

**Table S69.** The Cartesian Coordinates of **C6-II**.

|   |           |           |           |
|---|-----------|-----------|-----------|
| C | -4.095940 | 2.449931  | 0.522626  |
| C | -4.032898 | 0.990701  | 0.605068  |
| C | -2.712259 | 0.364436  | 0.602245  |
| C | -1.599250 | 1.145528  | 0.486887  |
| C | -1.738477 | 2.552237  | 0.331389  |
| C | -2.974257 | 3.206725  | 0.367481  |
| N | -0.273584 | 0.802564  | 0.451983  |
| C | 0.487261  | 1.904698  | -0.146761 |
| C | -0.384041 | 3.131893  | 0.152309  |
| C | 0.115444  | -0.560571 | 0.165392  |
| S | -4.973345 | 0.438120  | -0.942734 |
| C | -4.975983 | -1.313011 | -0.678759 |
| C | -4.127213 | -2.117975 | -1.434924 |
| C | -4.161394 | -3.496628 | -1.271215 |
| C | -5.029552 | -4.065702 | -0.347926 |
| C | -5.871679 | -3.259407 | 0.410642  |
| C | -5.852529 | -1.882714 | 0.242744  |
| H | -5.078139 | 2.907043  | 0.549881  |
| H | -4.668435 | 0.627979  | 1.420993  |
| H | -2.657879 | -0.715398 | 0.657432  |
| H | -3.025410 | 4.282224  | 0.264216  |
| H | 1.479424  | 1.968296  | 0.294448  |
| H | 0.588055  | 1.754997  | -1.227684 |
| H | -0.351295 | 3.914627  | -0.603792 |
| H | -0.106427 | 3.589499  | 1.110968  |
| H | -0.342511 | -1.236414 | 0.887056  |
| H | -0.187400 | -0.860063 | -0.845622 |
| H | 1.196748  | -0.643836 | 0.253417  |
| H | -3.446397 | -1.663089 | -2.143492 |
| H | -3.506851 | -4.123793 | -1.862295 |
| H | -5.051652 | -5.140180 | -0.218824 |
| H | -6.550050 | -3.703961 | 1.127169  |
| H | -6.514385 | -1.248656 | 0.819882  |

**Table S70.** The Cartesian Coordinates of **C6-III**.

|   |           |          |           |
|---|-----------|----------|-----------|
| C | -2.669654 | 2.432172 | -0.220299 |
| C | -2.594450 | 0.977902 | -0.358695 |
| C | -1.275478 | 0.377931 | -0.552647 |
| C | -0.169739 | 1.178335 | -0.565947 |
| C | -0.310502 | 2.577289 | -0.350234 |
| C | -1.550066 | 3.206998 | -0.196272 |
| N | 1.153122  | 0.864644 | -0.726336 |
| C | 1.974048  | 1.967908 | -0.217489 |
| C | 1.044442  | 3.182434 | -0.344813 |

|   |           |           |           |
|---|-----------|-----------|-----------|
| C | 1.608242  | -0.496688 | -0.554469 |
| S | -3.324206 | 0.351408  | 1.270298  |
| C | -3.393515 | -1.382569 | 0.916418  |
| C | -4.406281 | -1.892093 | 0.105861  |
| C | -4.475524 | -3.257136 | -0.129210 |
| C | -3.546191 | -4.112471 | 0.453492  |
| C | -2.541853 | -3.603804 | 1.267198  |
| C | -2.458151 | -2.236487 | 1.495679  |
| H | -3.653871 | 2.869784  | -0.102085 |
| H | -3.324127 | 0.633270  | -1.100986 |
| H | -1.212039 | -0.698699 | -0.647797 |
| H | -1.604573 | 4.277995  | -0.054880 |
| H | 2.886600  | 2.065784  | -0.801399 |
| H | 2.241005  | 1.793419  | 0.830874  |
| H | 1.168961  | 3.938177  | 0.429165  |
| H | 1.172213  | 3.682415  | -1.313782 |
| H | 1.064838  | -1.157714 | -1.229189 |
| H | 2.666764  | -0.547356 | -0.801279 |
| H | 1.462966  | -0.842480 | 0.476365  |
| H | -5.134262 | -1.220488 | -0.332680 |
| H | -5.260390 | -3.654423 | -0.759551 |
| H | -3.607039 | -5.178037 | 0.273203  |
| H | -1.819693 | -4.269270 | 1.721984  |
| H | -1.672892 | -1.828349 | 2.119601  |

**Table S71.** The Cartesian Coordinates of **C6-IV**.

|   |           |           |           |
|---|-----------|-----------|-----------|
| C | -4.094946 | 2.446546  | 0.521685  |
| C | -4.029634 | 0.987290  | 0.601808  |
| C | -2.707917 | 0.363209  | 0.598293  |
| C | -1.596181 | 1.146271  | 0.485930  |
| C | -1.737350 | 2.553063  | 0.333126  |
| C | -2.974318 | 3.205332  | 0.368691  |
| N | -0.269650 | 0.805315  | 0.452087  |
| C | 0.489334  | 1.909862  | -0.144925 |
| C | -0.383675 | 3.135169  | 0.156689  |
| C | 0.120537  | -0.556457 | 0.159959  |
| S | -4.971071 | 0.435131  | -0.944891 |
| C | -4.977314 | -1.315744 | -0.679031 |
| C | -4.125606 | -2.122964 | -1.429267 |
| C | -4.162952 | -3.501330 | -1.263670 |
| C | -5.037084 | -4.067699 | -0.344460 |
| C | -5.882237 | -3.259100 | 0.408354  |
| C | -5.860014 | -1.882753 | 0.238423  |
| H | -5.077608 | 2.902357  | 0.549895  |

|   |           |           |           |
|---|-----------|-----------|-----------|
| H | -4.663457 | 0.622644  | 1.418349  |
| H | -2.651769 | -0.716703 | 0.650505  |
| H | -3.027540 | 4.280858  | 0.266747  |
| H | 1.481614  | 1.973941  | 0.295895  |
| H | 0.589638  | 1.762412  | -1.226211 |
| H | -0.351983 | 3.919409  | -0.597941 |
| H | -0.107020 | 3.591409  | 1.116220  |
| H | -0.336116 | -1.235500 | 0.879424  |
| H | -0.182837 | -0.852338 | -0.851968 |
| H | 1.201990  | -0.638902 | 0.246867  |
| H | -3.439969 | -1.669976 | -2.134387 |
| H | -3.506254 | -4.130542 | -1.850167 |
| H | -5.061400 | -5.141973 | -0.214081 |
| H | -6.565188 | -3.701665 | 1.121745  |
| H | -6.524121 | -1.246373 | 0.810406  |

**Table S72.** The Cartesian Coordinates of **C7-I**.

|   |           |           |           |
|---|-----------|-----------|-----------|
| C | -2.711485 | 1.376503  | 1.862112  |
| C | -1.523603 | 1.179139  | 1.282676  |
| C | -1.214920 | -0.047404 | 0.491922  |
| C | -2.280236 | -1.076420 | 0.589687  |
| C | -3.563697 | -0.797093 | 1.171583  |
| C | -3.766185 | 0.377688  | 1.791051  |
| N | -2.213188 | -2.293734 | 0.155495  |
| C | -3.465210 | -3.046641 | 0.379280  |
| C | -4.432710 | -2.012756 | 0.980862  |
| C | -1.078474 | -2.960778 | -0.455865 |
| C | 0.331851  | 1.405076  | -1.294213 |
| C | 0.225011  | 2.782445  | -1.460928 |
| C | 1.374701  | 3.562315  | -1.489051 |
| C | 2.621483  | 2.970081  | -1.338236 |
| C | 2.724940  | 1.593377  | -1.167243 |
| C | 1.582676  | 0.807121  | -1.153688 |
| S | -1.134322 | 0.406481  | -1.312826 |
| H | -2.912544 | 2.295417  | 2.395660  |
| H | -0.742239 | 1.927001  | 1.325803  |
| H | -0.240684 | -0.466895 | 0.750546  |
| H | -4.718972 | 0.591407  | 2.260590  |
| H | -3.239787 | -3.873252 | 1.053254  |
| H | -3.795664 | -3.451519 | -0.576103 |
| H | -5.252078 | -1.799185 | 0.295360  |
| H | -4.858277 | -2.357488 | 1.920908  |
| H | -0.881366 | -3.876078 | 0.102078  |
| H | -1.332085 | -3.213732 | -1.485270 |

|   |           |           |           |
|---|-----------|-----------|-----------|
| H | -0.206567 | -2.314503 | -0.440897 |
| H | -0.751855 | 3.236945  | -1.565612 |
| H | 1.292719  | 4.633151  | -1.622547 |
| H | 3.515237  | 3.580358  | -1.355130 |
| H | 3.696744  | 1.130633  | -1.054129 |
| H | 1.656688  | -0.267660 | -1.037228 |

**Table S73.** The Cartesian Coordinates of **C7-II**.

|   |           |           |           |
|---|-----------|-----------|-----------|
| C | -2.859275 | 1.571002  | 1.170334  |
| C | -1.782961 | 1.473383  | 0.384388  |
| C | -1.332537 | 0.175168  | -0.195759 |
| C | -2.306834 | -0.921652 | 0.028927  |
| C | -3.412983 | -0.787728 | 0.936306  |
| C | -3.683727 | 0.412446  | 1.475559  |
| N | -2.273399 | -2.100881 | -0.503297 |
| C | -3.377029 | -2.966078 | -0.036482 |
| C | -4.093754 | -2.127663 | 1.035503  |
| C | -1.334519 | -2.611478 | -1.485290 |
| C | 1.322026  | 0.906384  | 0.158972  |
| C | 1.832360  | 0.900412  | -1.137555 |
| C | 2.717687  | 1.893052  | -1.531471 |
| C | 3.104148  | 2.879556  | -0.630416 |
| C | 2.601226  | 2.878100  | 0.664298  |
| C | 1.704122  | 1.894593  | 1.061487  |
| S | 0.215527  | -0.377264 | 0.682921  |
| H | -3.134762 | 2.523133  | 1.602775  |
| H | -1.161516 | 2.332753  | 0.168197  |
| H | -1.076483 | 0.267446  | -1.253064 |
| H | -4.532692 | 0.535934  | 2.137277  |
| H | -2.948997 | -3.892161 | 0.344040  |
| H | -4.004660 | -3.196139 | -0.897813 |
| H | -5.162612 | -2.056133 | 0.846359  |
| H | -3.951399 | -2.558427 | 2.026202  |
| H | -1.904062 | -3.014227 | -2.322531 |
| H | -0.673879 | -1.819810 | -1.824786 |
| H | -0.749331 | -3.410165 | -1.029661 |
| H | 1.537439  | 0.120202  | -1.829108 |
| H | 3.113070  | 1.891225  | -2.538929 |
| H | 3.800251  | 3.648945  | -0.938792 |
| H | 2.901472  | 3.644889  | 1.366517  |
| H | 1.298584  | 1.891283  | 2.065191  |

**Table S74.** The Cartesian Coordinates of **C7-III**.

|   |           |          |           |
|---|-----------|----------|-----------|
| C | -4.415592 | 2.132917 | -0.215484 |
|---|-----------|----------|-----------|

|   |           |           |           |
|---|-----------|-----------|-----------|
| C | -4.392160 | 0.841988  | -0.560599 |
| C | -3.117961 | 0.061287  | -0.582605 |
| C | -1.927259 | 0.932572  | -0.569956 |
| C | -1.995395 | 2.281461  | -0.058576 |
| C | -3.193805 | 2.865971  | 0.086316  |
| N | -0.721729 | 0.635915  | -0.937701 |
| C | 0.233408  | 1.737543  | -0.685974 |
| C | -0.584971 | 2.783959  | 0.086252  |
| C | -0.247091 | -0.554521 | -1.621410 |
| C | -1.574745 | -1.638148 | 1.093131  |
| C | -1.469522 | -2.894763 | 0.499197  |
| C | -0.251348 | -3.558351 | 0.505383  |
| C | 0.857618  | -2.973583 | 1.108473  |
| C | 0.749934  | -1.726391 | 1.713101  |
| C | -0.465919 | -1.055737 | 1.705905  |
| S | -3.122428 | -0.779417 | 1.096037  |
| H | -5.357077 | 2.662164  | -0.157745 |
| H | -5.300268 | 0.289406  | -0.761804 |
| H | -3.101263 | -0.712136 | -1.346625 |
| H | -3.267517 | 3.900285  | 0.399228  |
| H | 0.585906  | 2.094950  | -1.654203 |
| H | 1.078517  | 1.336701  | -0.127704 |
| H | -0.295449 | 2.798186  | 1.137705  |
| H | -0.455961 | 3.785351  | -0.317511 |
| H | -1.077289 | -1.207030 | -1.870139 |
| H | 0.264671  | -0.236286 | -2.529516 |
| H | 0.456544  | -1.080921 | -0.975076 |
| H | -2.338414 | -3.341953 | 0.032428  |
| H | -0.167246 | -4.532684 | 0.041936  |
| H | 1.806704  | -3.494121 | 1.111188  |
| H | 1.611492  | -1.274379 | 2.187191  |
| H | -0.560487 | -0.080432 | 2.168961  |

**Table S75.** The Cartesian Coordinates of **C7-IV**.

|   |           |           |           |
|---|-----------|-----------|-----------|
| C | -5.860868 | -1.803564 | -0.185501 |
| C | -5.656939 | -0.976296 | 0.844217  |
| C | -4.297746 | -0.439136 | 1.157813  |
| C | -3.358275 | -0.601156 | 0.032306  |
| C | -3.572054 | -1.611963 | -0.976919 |
| C | -4.785695 | -2.169981 | -1.096729 |
| N | -2.256352 | 0.043733  | -0.182994 |
| C | -1.521435 | -0.469826 | -1.359602 |
| C | -2.309749 | -1.717104 | -1.788283 |
| C | -1.738024 | 1.213675  | 0.504312  |

|   |           |           |           |
|---|-----------|-----------|-----------|
| C | -2.040450 | -1.032939 | 2.780853  |
| C | -0.961391 | -1.638207 | 2.138056  |
| C | 0.328079  | -1.181808 | 2.377021  |
| C | 0.538080  | -0.124262 | 3.254621  |
| C | -0.537919 | 0.472300  | 3.903836  |
| C | -1.827765 | 0.017738  | 3.671738  |
| S | -3.679811 | -1.625604 | 2.475606  |
| H | -6.844244 | -2.218113 | -0.361880 |
| H | -6.448223 | -0.721992 | 1.536706  |
| H | -4.319391 | 0.558939  | 1.587818  |
| H | -4.990671 | -2.876973 | -1.891252 |
| H | -0.495450 | -0.677486 | -1.058438 |
| H | -1.517422 | 0.317761  | -2.113997 |
| H | -2.501593 | -1.734361 | -2.858452 |
| H | -1.765952 | -2.624458 | -1.522479 |
| H | -2.451235 | 1.570706  | 1.239683  |
| H | -0.798540 | 0.953306  | 0.993925  |
| H | -1.553881 | 1.985422  | -0.242837 |
| H | -1.137942 | -2.458459 | 1.451963  |
| H | 1.166228  | -1.649802 | 1.877202  |
| H | 1.543181  | 0.233633  | 3.437243  |
| H | -0.371640 | 1.290536  | 4.592337  |
| H | -2.672212 | 0.476043  | 4.171411  |

**Table S76.** The Cartesian Coordinates of **C2-I**.

|   |           |           |           |
|---|-----------|-----------|-----------|
| C | -2.215234 | 0.349482  | 2.163795  |
| C | -1.591646 | -0.897052 | 1.760476  |
| C | -2.120775 | -1.734305 | 0.835198  |
| C | -3.357465 | -1.346985 | 0.255835  |
| C | -4.016926 | -0.123217 | 0.666912  |
| C | -3.397165 | 0.736757  | 1.629339  |
| N | -4.073218 | -1.963531 | -0.661609 |
| C | -5.270132 | -1.200846 | -0.941404 |
| C | -5.175950 | -0.041264 | -0.030863 |
| C | -3.799175 | -3.258156 | -1.264443 |
| S | -1.481335 | 1.294995  | 3.457243  |
| C | 0.224856  | 1.298352  | 2.971990  |
| C | 1.190174  | 1.168859  | 3.966332  |
| C | 2.536495  | 1.221765  | 3.629528  |
| C | 2.920962  | 1.381250  | 2.304307  |
| C | 1.953304  | 1.503636  | 1.313686  |
| C | 0.605831  | 1.475865  | 1.643603  |
| S | -5.178115 | -0.607636 | -2.691472 |
| C | -6.804536 | 0.084990  | -2.837745 |

|   |            |           |           |
|---|------------|-----------|-----------|
| C | -7.903236  | -0.752565 | -3.019948 |
| C | -9.167664  | -0.202089 | -3.168237 |
| C | -9.332756  | 1.178614  | -3.150289 |
| C | -8.234622  | 2.011662  | -2.978103 |
| C | -6.967229  | 1.467445  | -2.816501 |
| H | -0.656123  | -1.166193 | 2.236446  |
| H | -1.632192  | -2.658990 | 0.563748  |
| H | -3.876895  | 1.664427  | 1.912386  |
| H | -6.169803  | -1.809118 | -0.823431 |
| H | -5.921176  | 0.740219  | 0.005323  |
| H | -2.725717  | -3.382353 | -1.381443 |
| H | -4.201797  | -4.052236 | -0.636133 |
| H | -4.275279  | -3.288425 | -2.241999 |
| H | 0.888416   | 1.021496  | 4.995772  |
| H | 3.284712   | 1.123656  | 4.405440  |
| H | 3.970818   | 1.410483  | 2.043443  |
| H | 2.246461   | 1.633185  | 0.279756  |
| H | -0.145838  | 1.594850  | 0.872639  |
| H | -7.763337  | -1.826289 | -3.047483 |
| H | -10.022608 | -0.850838 | -3.307423 |
| H | -10.319885 | 1.605186  | -3.273649 |
| H | -8.362326  | 3.086219  | -2.966233 |
| H | -6.106172  | 2.108294  | -2.674589 |

**Table S77.** The Cartesian Coordinates of **C2-II**.

|   |           |           |           |
|---|-----------|-----------|-----------|
| C | -1.325455 | 1.267340  | 0.012049  |
| C | -0.785310 | -0.063499 | -0.193066 |
| C | -1.518388 | -1.106370 | -0.654324 |
| C | -2.881974 | -0.847538 | -0.952881 |
| C | -3.436861 | 0.481342  | -0.785083 |
| C | -2.621796 | 1.538704  | -0.268279 |
| N | -3.805830 | -1.672294 | -1.400472 |
| C | -5.055542 | -0.962675 | -1.567015 |
| C | -4.734472 | 0.424126  | -1.171770 |
| C | -3.633922 | -3.066088 | -1.776910 |
| S | -0.243684 | 2.568830  | 0.502785  |
| C | 0.656793  | 1.813264  | 1.830821  |
| C | 0.037806  | 0.974357  | 2.755067  |
| C | 0.778323  | 0.438861  | 3.799553  |
| C | 2.124308  | 0.756040  | 3.940949  |
| C | 2.733149  | 1.605900  | 3.026168  |
| C | 2.006557  | 2.127115  | 1.963789  |
| S | -6.278075 | -1.669658 | -0.372175 |
| C | -7.725939 | -0.790101 | -0.898302 |



|   |            |           |           |
|---|------------|-----------|-----------|
| C | -8.220843  | 0.245289  | -0.110264 |
| C | -9.381512  | 0.904774  | -0.493594 |
| C | -10.036138 | 0.538196  | -1.662594 |
| C | -9.537270  | -0.494306 | -2.449648 |
| C | -8.386142  | -1.166686 | -2.066258 |
| H | 0.263525   | -0.218580 | 0.030581  |
| H | -1.080331  | -2.082762 | -0.802930 |
| H | -3.046074  | 2.522579  | -0.117478 |
| H | -5.448575  | -1.073738 | -2.580165 |
| H | -5.466020  | 1.219316  | -1.172241 |
| H | -2.880704  | -3.522277 | -1.140079 |
| H | -4.583576  | -3.578335 | -1.637683 |
| H | -3.331544  | -3.133060 | -2.821675 |
| H | -1.016970  | 0.745404  | 2.662930  |
| H | 0.296790   | -0.218938 | 4.511720  |
| H | 2.695684   | 0.342328  | 4.761575  |
| H | 3.781350   | 1.855546  | 3.128733  |
| H | 2.485119   | 2.771858  | 1.237234  |
| H | -7.698652  | 0.528915  | 0.794700  |
| H | -9.770436  | 1.706736  | 0.120189  |
| H | -10.938745 | 1.055763  | -1.960932 |
| H | -10.050023 | -0.783008 | -3.357884 |
| H | -8.000302  | -1.982667 | -2.665041 |

**Table S78.** The Cartesian Coordinates of **C3-I**.

|   |           |           |           |
|---|-----------|-----------|-----------|
| C | -8.679641 | 0.086889  | -0.497405 |
| C | -9.247143 | -1.184374 | -0.326500 |
| C | -8.461450 | -2.310452 | -0.138902 |
| C | -7.095376 | -2.111859 | -0.130732 |
| C | -6.511536 | -0.865955 | -0.302073 |
| C | -7.292840 | 0.256094  | -0.484688 |
| N | -6.055851 | -3.071067 | 0.041761  |
| C | -4.900541 | -2.507834 | -0.027138 |
| C | -5.024942 | -1.038645 | -0.216705 |
| C | -6.320916 | -4.482631 | 0.297234  |
| S | -9.820425 | 1.413178  | -0.732243 |
| C | -8.765023 | 2.838249  | -0.763039 |
| C | -8.406787 | 3.458570  | 0.431019  |
| C | -7.588383 | 4.579592  | 0.405003  |
| C | -7.134952 | 5.082797  | -0.808957 |
| C | -7.500415 | 4.466760  | -1.999545 |
| C | -8.316279 | 3.342665  | -1.979963 |
| S | -4.394328 | -0.233232 | 1.312023  |
| C | -2.649780 | -0.508821 | 1.117870  |

|   |            |           |           |
|---|------------|-----------|-----------|
| C | -2.013054  | -1.475078 | 1.891411  |
| C | -0.641573  | -1.659742 | 1.769019  |
| C | 0.087262   | -0.887759 | 0.873720  |
| C | -0.551357  | 0.076317  | 0.101197  |
| C | -1.918740  | 0.273148  | 0.225752  |
| H | -10.325000 | -1.288192 | -0.337284 |
| H | -8.906730  | -3.287207 | -0.005162 |
| H | -6.840927  | 1.230836  | -0.612253 |
| H | -3.983011  | -3.070102 | 0.088475  |
| H | -4.463303  | -0.668289 | -1.074608 |
| H | -6.888011  | -4.882590 | -0.541097 |
| H | -5.373750  | -5.002462 | 0.402271  |
| H | -6.907104  | -4.560351 | 1.211221  |
| H | -8.766805  | 3.061411  | 1.371761  |
| H | -7.308679  | 5.061706  | 1.332754  |
| H | -6.498995  | 5.958514  | -0.826657 |
| H | -7.151379  | 4.859963  | -2.945566 |
| H | -8.604063  | 2.854859  | -2.902579 |
| H | -2.589636  | -2.075068 | 2.584188  |
| H | -0.145121  | -2.408421 | 2.372570  |
| H | 1.155435   | -1.034527 | 0.778813  |
| H | 0.017150   | 0.681808  | -0.592613 |
| H | -2.421402  | 1.031402  | -0.362252 |

**Table S79.** The Cartesian Coordinates of **C3-II.**

|   |           |           |           |
|---|-----------|-----------|-----------|
| C | -8.631206 | 0.047310  | -0.458023 |
| C | -9.123940 | -1.250515 | -0.659408 |
| C | -8.311091 | -2.364506 | -0.523000 |
| C | -6.996164 | -2.126262 | -0.176732 |
| C | -6.486616 | -0.852952 | 0.026730  |
| C | -7.293537 | 0.256741  | -0.113595 |
| N | -5.944786 | -3.064687 | 0.030269  |
| C | -4.851157 | -2.463143 | 0.344889  |
| C | -5.029278 | -0.986948 | 0.351472  |
| C | -6.129566 | -4.501896 | -0.135295 |
| S | -9.796137 | 1.354363  | -0.679771 |
| C | -8.855894 | 2.795454  | -0.250552 |
| C | -8.805609 | 3.216970  | 1.075412  |
| C | -8.077932 | 4.351102  | 1.409486  |
| C | -7.407537 | 5.063891  | 0.422221  |
| C | -7.464879 | 4.645116  | -0.901426 |
| C | -8.189870 | 3.510382  | -1.241788 |
| S | -4.031405 | -0.302913 | -1.033510 |
| C | -2.391854 | -0.515413 | -0.383940 |

|   |            |           |           |
|---|------------|-----------|-----------|
| C | -1.543033  | -1.453305 | -0.964432 |
| C | -0.242544  | -1.587655 | -0.494447 |
| C | 0.202080   | -0.798075 | 0.557868  |
| C | -0.649725  | 0.135496  | 1.138929  |
| C | -1.944091  | 0.286314  | 0.664220  |
| H | -10.164688 | -1.385660 | -0.926439 |
| H | -8.698144  | -3.362392 | -0.680092 |
| H | -6.896454  | 1.251794  | 0.036653  |
| H | -3.933899  | -3.006472 | 0.531473  |
| H | -4.714922  | -0.522202 | 1.286128  |
| H | -6.437094  | -4.692830 | -1.161879 |
| H | -5.190914  | -5.000816 | 0.083767  |
| H | -6.908653  | -4.827389 | 0.551326  |
| H | -9.332563  | 2.656508  | 1.837272  |
| H | -8.038037  | 4.679041  | 2.440162  |
| H | -6.843100  | 5.949486  | 0.684587  |
| H | -6.946412  | 5.201580  | -1.671432 |
| H | -8.238753  | 3.176098  | -2.270371 |
| H | -1.900706  | -2.070971 | -1.778510 |
| H | 0.419605   | -2.312923 | -0.949225 |
| H | 1.214307   | -0.907233 | 0.925353  |
| H | -0.302010  | 0.754894  | 1.955492  |
| H | -2.606295  | 1.024519  | 1.100258  |

## 9. Reference.

1. H. Y. Li, J. Y. Jie, S. X. Wu, X. B. Yang and H. Xu, *Org. Chem. Front.*, 2017, **4**, 250–254.
2. W. S. Ouyang, X. Q. Cai, X. J. Chen, J. Wang, J. H. Rao, Y. Gao, Y. P. Huo, Q. Chen and X. W. Li, *Chem. Commun.*, 2021, **57**, 8075–8078.
3. D. Singh, A. M. Deobald, L. R. S. Camargo, G. Tabarelli, O. E. D. Rodrigues and A. L. Braga, *Org. Lett.*, 2010, **12**, 3288–3291.
4. F. Neese, *Wiley. Interdiscip. Rev. Comput. Mol. Sci.*, 2012, **2**, 73–78.
5. F. Neese, *Wiley. Interdiscip. Rev. Comput. Mol. Sci.*, 2018, **8**, e1327.
6. Y. Zhao, D. G. Truhlar, *Theor. Chem. Acc.*, 2008, **120**, 215–241.
7. F. Weigend, *Phys. Chem. Chem. Phys.*, 2006, **8**, 1057–1065.
8. (a) A. Klamt and G. Schüürmann, *J. Chem. Soc. Perkin. Trans.*, 1993, **2**, 799; (b) J. Andzelm, C. Kölmel and A. Klamt, *J. Chem. Phys.*, 1995, **103**, 9312–9320; (c) V. Barone and M. Cossi, *J. Phys. Chem. A.*, 1998, **102**, 1995–2001; (d) M. Cossi, N. Rega, G. Scalmani and V. Barone, *J. Comput. Chem.*, 2003, **24**, 669–681.
9. (a) T. Lu and Q. Chen, *Comp. Theore. Chem.*, 2021, **1200**, 113249; (b) Shermo 2.3.4, 2023,

(<http://sobereva.com/soft/shermo>)

10. CYLview20, C. Y. Legault, Université de Sherbrooke, 2020, (<http://www.cylview.org>).

11. (a) W. Humphrey, A. Dalke and K. Schulten, *J. Molec. Graphics.*, 1996, **14**, 33–38; (b) VMD 1.9.3, 2023, (<https://tcbg.illinois.edu/Research/vmd/>).

12. (a) T. Lu and F. Chen, *J. Comput. Chem.*, 2012, **33**, 580–592; (b) Multiwfn 3.7, 2023, (<http://sobereva.com/multiwfn/>).

## 10. Analytic data of the obtained compounds.

### (1) 1-methyl-5-(phenylthio)indoline (1a-1)

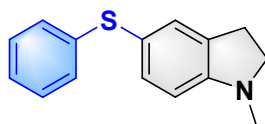

Yellow liquid,  $^1\text{H-NMR}$  (500 MHz, Chloroform-*d*)  $\delta$  7.31 (d,  $J = 8.0$  Hz, 1H), 7.25–7.22 (m, 3H), 7.17–7.15 (m, 2H), 7.11 (d,  $J = 7.3$  Hz, 1H), 6.47 (d,  $J = 8.1$  Hz, 1H), 3.41 (t,  $J = 8.3$  Hz, 2H), 2.98 (t,  $J = 8.3$  Hz, 2H), 2.83 (s, 3H).  $^{13}\text{C-NMR}$  (126 MHz, Chloroform-*d*)  $\delta$  153.96, 140.48, 135.02, 131.70, 131.00, 128.75, 126.95, 124.99, 118.66, 107.21, 55.83, 35.58, 28.35. **HRMS (ESI)**: Calcd. for  $\text{C}_{15}\text{H}_{15}\text{NS}$   $[\text{M}+\text{H}]^+$ : 242.0925, found: 242.0919.

### (2) 1-methyl-5-(phenylthio)-1*H*-indole (1a-2)

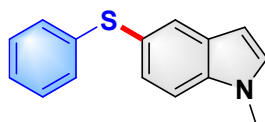

Known compound,  $^1\text{H-NMR}$  (600 MHz, Chloroform-*d*)  $\delta$  7.92 (s, 1H), 7.43 (d,  $J = 6.9$  Hz, 1H), 7.37 (d,  $J = 8.5$  Hz, 1H), 7.28–7.24 (m, 2H), 7.24–7.21 (m, 2H), 7.16 (t,  $J = 7.2$  Hz, 1H), 7.13 (d,  $J = 3.1$  Hz, 1H), 6.54 (d,  $J = 3.0$  Hz, 1H), 3.84 (s, 3H).  $^{13}\text{C-NMR}$  (151 MHz, Chloroform-*d*)  $\delta$  140.04, 136.65, 129.86, 129.48, 128.84, 127.92, 127.75, 127.56, 125.27, 122.33, 110.38, 101.25, 33.03.

### (3) 1-methyl-3-(phenylthio)-1*H*-indole (1a-4)

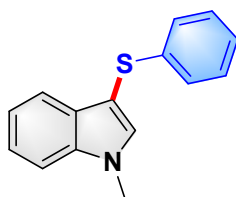

Known compound,  $^1\text{H-NMR}$  (600 MHz, Chloroform-*d*)  $\delta$  7.68 (d,  $J = 7.9$  Hz, 1H), 7.44 (d,  $J = 8.2$  Hz, 1H), 7.37 (s, 1H), 7.35 (d,  $J = 7.3$  Hz, 1H), 7.21 (ddt,  $J = 13.2, 7.2, 3.4$  Hz, 3H), 7.18–7.15 (m, 2H), 7.10 (t,  $J = 7.2$  Hz, 1H), 3.87 (s, 3H).  $^{13}\text{C-NMR}$  (151 MHz, Chloroform-*d*)  $\delta$  139.73, 137.60, 135.12, 129.89, 128.71, 125.78, 124.72, 122.62, 120.55, 119.78, 109.79, 100.54, 33.17.

**(4) 1-methyl-3-((4-nitrophenyl)thio)-1H-indole (4)**

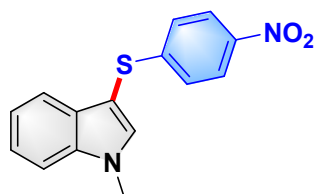

Known compound, (47.6 mg, 67% yield),  $^1\text{H-NMR}$  (600 MHz, Chloroform-*d*)  $\delta$  8.01 (d,  $J = 8.9$  Hz, 2H), 7.55 (d,  $J = 7.9$  Hz, 1H), 7.47 (d,  $J = 8.3$  Hz, 1H), 7.40 (s, 1H), 7.37 (t,  $J = 7.6$  Hz, 1H), 7.23 (t,  $J = 7.5$  Hz, 1H), 7.15 (d,  $J = 8.9$  Hz, 2H), 3.92 (s, 3H).  $^{13}\text{C-NMR}$  (151 MHz, Chloroform-*d*)  $\delta$  150.21, 144.93, 137.74, 135.41, 129.23, 125.04, 123.83, 123.10, 121.07, 119.32, 110.13, 97.93, 33.32.

**(5) methyl 2-((1-methyl-1H-indol-3-yl)thio)benzoate (5)**

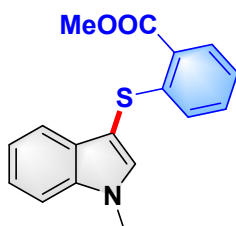

Known compound, (60.1 mg, 81% yield),  $^1\text{H-NMR}$  (600 MHz, Chloroform-*d*)  $\delta$  8.05 (d,  $J = 7.7$  Hz, 1H), 7.59 (d,  $J = 7.9$  Hz, 1H), 7.43 (d,  $J = 8.3$  Hz, 1H), 7.36–7.32 (m, 2H), 7.19 (t,  $J = 7.5$  Hz, 1H), 7.16–7.13 (m, 1H), 7.08 (t,  $J = 7.5$  Hz, 1H), 6.90 (d,  $J = 8.1$  Hz, 1H), 4.03 (s, 3H), 3.87 (s, 3H).  $^{13}\text{C-NMR}$  (151 MHz, Chloroform-*d*)  $\delta$  167.07, 144.80, 137.83, 135.56, 132.25, 131.17, 129.83, 126.36, 125.90, 123.61, 122.70, 120.62, 119.80, 109.87, 100.63, 52.11, 33.18.

**(6) 1-methyl-3,5-bis(phenylthio)-1H-indole (3aa)**

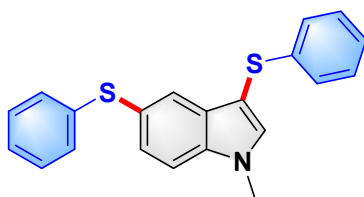

White solid, (81.5 mg, 94% yield), m.p.: 124-125 °C,  $^1\text{H-NMR}$  (500 MHz, Chloroform-*d*)  $\delta$  7.87 (d,  $J$  = 1.3 Hz, 1H), 7.43 (d,  $J$  = 6.9 Hz, 1H), 7.39 (d,  $J$  = 8.1 Hz, 2H), 7.23–7.20 (m, 2H), 7.20–7.16 (m, 4H), 7.15–7.12 (m, 3H), 7.09 (t,  $J$  = 7.2 Hz, 1H), 3.86 (s, 3H).  $^{13}\text{C-NMR}$  (125 MHz, Chloroform-*d*)  $\delta$  139.15, 139.12, 137.38, 135.89, 130.73, 128.85, 128.76, 128.56, 128.04, 126.00, 125.89, 125.57, 124.97, 124.57, 110.96, 101.24, 33.33. **HRMS (ESI):** Calcd. for  $\text{C}_{21}\text{H}_{17}\text{NS}_2$   $[\text{M}+\text{H}]^+$ : 348.0875, found: 348.0869.

**(7) 1-ethyl-3,5-bis(phenylthio)-1H-indole (3ba)**

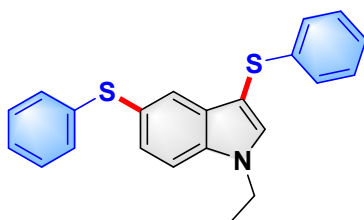

White solid, (55.1 mg, 61% yield), m.p.: 115-116 °C,  $^1\text{H-NMR}$  (500 MHz, Chloroform-*d*)  $\delta$  7.89 (s, 1H), 7.47 (s, 1H), 7.43 (s, 2H), 7.24–7.19 (m, 6H), 7.16–7.09 (m, 4H), 4.24 (q,  $J$  = 7.3 Hz, 2H), 1.56 (t,  $J$  = 7.3 Hz, 3H).  $^{13}\text{C-NMR}$  (125 MHz, Chloroform-*d*)  $\delta$  139.24, 139.15, 136.52, 134.20, 130.89, 128.87, 128.78, 128.44, 128.07, 126.01, 125.95, 125.58, 124.95, 124.48, 111.04, 101.22, 41.60, 15.45. **HRMS (ESI):** Calcd. for  $\text{C}_{22}\text{H}_{19}\text{NS}_2$   $[\text{M}+\text{H}]^+$ : 362.1032, found: 362.1027.

**(8) 3,5-bis(phenylthio)-1-propyl-1H-indole (3ca)**

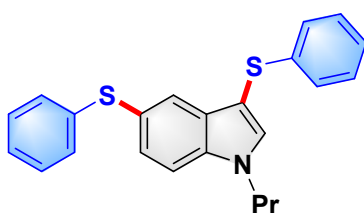

White solid, (69.4 mg, 74% yield), m.p.: 89-90 °C,  $^1\text{H-NMR}$  (600 MHz, Chloroform-*d*)  $\delta$  7.89 (s, 1H), 7.45 (s, 1H), 7.42 (d,  $J$  = 1.1 Hz, 2H), 7.25–7.19 (m, 6H), 7.16–7.13 (m, 3H), 7.11 (t,  $J$  = 7.3 Hz, 1H), 4.15 (t,  $J$  = 7.1 Hz, 2H), 1.96 (h,  $J$  = 7.3 Hz, 2H), 1.02 (t,  $J$  = 7.4 Hz, 3H).  $^{13}\text{C-NMR}$  (151 MHz, Chloroform-*d*)  $\delta$  139.28, 139.12, 136.77, 135.07, 130.84, 128.87, 128.78, 128.40, 128.09, 125.95, 125.90, 125.59, 124.93,

124.44, 111.17, 101.03, 48.60, 23.47, 11.56. **HRMS (ESI):** Calcd. for C<sub>23</sub>H<sub>21</sub>NS<sub>2</sub> [M+H]<sup>+</sup>: 376.1188, found: 376.1184.

**(9) 1-benzyl-3,5-bis(phenylthio)-1H-indole (3da)**

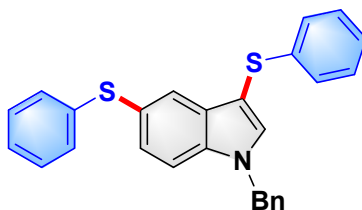

Yellow liquid, (69.8 mg, 66% yield), **<sup>1</sup>H-NMR** (600 MHz, Chloroform-*d*) δ 7.96–7.81 (m, 1H), 7.46 (s, 1H), 7.42–7.35 (m, 5H), 7.25–7.21 (m, 8H), 7.18–7.16 (m, 3H), 7.12 (t, *J* = 7.2 Hz, 1H), 5.37 (s, 2H). **<sup>13</sup>C-NMR** (151 MHz, Chloroform-*d*) δ 139.02, 138.80, 136.98, 136.29, 135.22, 130.98, 129.08, 128.90, 128.81, 128.50, 128.45, 128.20, 127.14, 126.12, 125.75, 125.69, 125.19, 125.05, 111.41, 102.17, 50.70. **HRMS (ESI):** Calcd. for C<sub>27</sub>H<sub>21</sub>NS<sub>2</sub> [M+H]<sup>+</sup>: 424.1188, found: 424.1182.

**(10) 3,5-bis(phenylthio)-1H-indole (3fa)**

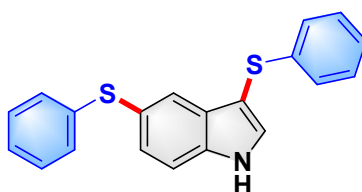

White solid, (35.0 mg, 42% yield), m.p.: 108-109 °C, **<sup>1</sup>H-NMR** (600 MHz, Chloroform-*d*) δ 8.43 (s, 1H), 7.89 (s, 1H), 7.48 (d, *J* = 2.6 Hz, 1H), 7.41–7.39 (m, 2H), 7.26–7.20 (m, 6H), 7.18–7.15 (m, 3H), 7.12 (t, *J* = 7.2 Hz, 1H). **<sup>13</sup>C-NMR** (151 MHz, Chloroform-*d*) δ 138.86, 138.74, 136.32, 131.55, 130.10, 128.95, 128.85, 128.34, 126.23, 125.78, 125.55, 125.19, 125.15, 112.84, 103.43. **HRMS (ESI):** Calcd. for C<sub>20</sub>H<sub>15</sub>NS<sub>2</sub> [M+H]<sup>+</sup>: 334.0719, found: 334.0713.

**(11) 1,2-dimethyl-3,5-bis(phenylthio)-1H-indole (3ga)**

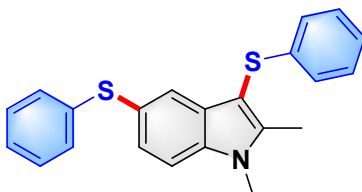

White solid, (68.6 mg, 76% yield), m.p.: 120-122 °C, **<sup>1</sup>H-NMR** (600 MHz, Chloroform-*d*) δ 7.86 (s, 1H), 7.40 (d, *J* = 6.8 Hz, 1H), 7.35 (d, *J* = 8.4 Hz, 1H), 7.23–7.17 (m, 6H), 7.13 (t, *J* = 7.1 Hz, 1H), 7.10–7.06

(m, 3H), 3.78 (s, 3H), 2.56 (s, 3H).  $^{13}\text{C-NMR}$  (151 MHz, Chloroform-*d*)  $\delta$  143.92, 139.52, 139.29, 137.03, 130.74, 128.78, 128.72, 127.94, 127.81, 125.65, 125.37, 125.31, 124.69, 124.12, 110.20, 98.77, 30.53, 10.97. **HRMS (ESI)**: Calcd. for  $\text{C}_{22}\text{H}_{19}\text{NS}_2$   $[\text{M}+\text{H}]^+$ : 362.1032, found: 362.1026.

**(12) 1-methyl-2-phenyl-3,5-bis(phenylthio)-1H-indole (3ha)**

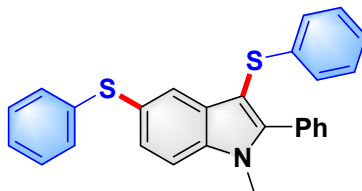

White solid, (84.6 mg, 80% yield), m.p.: 126-127 °C,  $^1\text{H-NMR}$  (600 MHz, Chloroform-*d*)  $\delta$  8.00 (d,  $J$  = 1.4 Hz, 1H), 7.55–7.50 (m, 6H), 7.48 (d,  $J$  = 8.5 Hz, 1H), 7.28 (dd,  $J$  = 5.2, 3.5 Hz, 4H), 7.24–7.18 (m, 3H), 7.16–7.11 (m, 3H), 3.79 (s, 3H).  $^{13}\text{C-NMR}$  (151 MHz, Chloroform-*d*)  $\delta$  146.88, 139.58, 139.31, 137.58, 130.82, 130.66, 130.23, 129.09, 128.93, 128.86, 128.81, 128.46, 128.12, 125.98, 125.90, 125.63, 125.00, 124.81, 111.20, 100.33, 31.96. **HRMS (ESI)**: Calcd. for  $\text{C}_{27}\text{H}_{21}\text{NS}_2$   $[\text{M}+\text{H}]^+$ : 424.1188, found: 424.1182.

**(13) 1,4-dimethyl-3,5-bis(phenylthio)-1H-indole (3ia)**

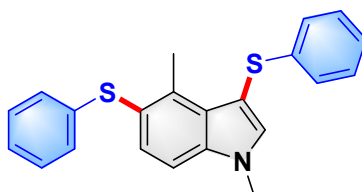

White solid, (60.5 mg, 67% yield), m.p.: 150-152 °C,  $^1\text{H-NMR}$  (600 MHz, Chloroform-*d*)  $\delta$  7.51 (d,  $J$  = 8.5 Hz, 1H), 7.37 (s, 1H), 7.25 (d,  $J$  = 8.5 Hz, 1H), 7.22–7.18 (m, 4H), 7.10–7.06 (m, 4H), 7.03 (dt,  $J$  = 8.3, 1.6 Hz, 2H), 3.84 (s, 3H), 2.83 (s, 3H).  $^{13}\text{C-NMR}$  (151 MHz, Chloroform-*d*)  $\delta$  141.31, 139.31, 138.33, 137.17, 137.15, 130.77, 128.79, 128.43, 126.76, 125.29, 124.89, 124.68, 123.34, 108.40, 101.19, 33.20, 15.60. **HRMS (ESI)**: Calcd. for  $\text{C}_{22}\text{H}_{19}\text{NS}_2$   $[\text{M}+\text{H}]^+$ : 362.1032, found: 362.1027.

**(14) 1,6-dimethyl-3,5-bis(phenylthio)-1H-indole (3ja)**

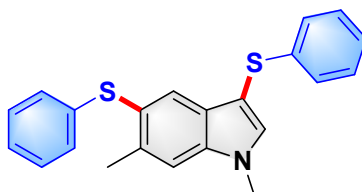

White solid, (49.6 mg, 55% yield), m.p.: 129-131 °C,  $^1\text{H-NMR}$  (600 MHz, Chloroform-*d*)  $\delta$  7.92 (d,  $J$  = 5.7 Hz, 1H), 7.36 (s, 1H), 7.32 (s, 1H), 7.23–7.15 (m, 6H), 7.13–7.05 (m, 4H), 3.84 (s, 3H), 2.56 (s, 3H).  $^{13}\text{C-NMR}$



**NMR** (151 MHz, Chloroform-*d*)  $\delta$  139.31, 138.95, 138.42, 136.33, 135.25, 128.94, 128.83, 128.74, 127.97, 126.88, 126.05, 125.05, 124.93, 123.73, 111.60, 101.10, 33.21, 21.52. **HRMS (ESI)**: Calcd. for C<sub>22</sub>H<sub>19</sub>NS<sub>2</sub> [M+H]<sup>+</sup>: 362.1032, found: 362.1028.

**(15) 1,8-bis(phenylthio)-5,6-dihydro-4*H*-pyrrolo[3,2,1-*ij*]quinoline (3ka)**

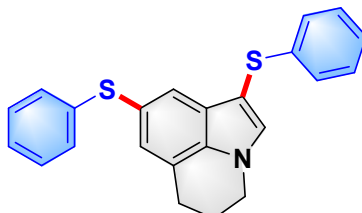

White solid, (72.7 mg, 78% yield), m.p.: 110-111 °C, **<sup>1</sup>H-NMR** (600 MHz, Chloroform-*d*)  $\delta$  7.74 (s, 1H), 7.37 (s, 1H), 7.26–7.23 (m, 4H), 7.22 (d, *J* = 6.5 Hz, 5H), 7.17–7.10 (m, 2H), 4.19 (t, 2H), 3.01 (t, *J* = 6.1 Hz, 2H), 2.29 (p, *J* = 6.0 Hz, 2H). **<sup>13</sup>C-NMR** (151 MHz, Chloroform-*d*)  $\delta$  139.64, 139.51, 134.98, 133.10, 128.85, 128.77, 128.38, 127.93, 126.11, 125.60, 125.46, 124.96, 124.56, 123.74, 123.61, 101.10, 44.44, 24.43, 22.72. **HRMS (ESI)**: Calcd. for C<sub>23</sub>H<sub>19</sub>NS<sub>2</sub> [M+H]<sup>+</sup>: 374.1032, found: 374.1028.

**(16) 6-fluoro-1-methyl-3,5-bis(phenylthio)-1*H*-indole (3la)**

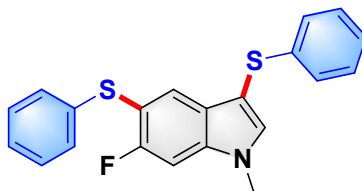

Brown solid, (67.5 mg, 74% yield), m.p.: 126-128 °C, **<sup>1</sup>H-NMR** (600 MHz, Chloroform-*d*)  $\delta$  7.81 (d, *J* = 7.0 Hz, 1H), 7.35 (s, 1H), 7.24–7.17 (m, 7H), 7.14 (dd, *J* = 10.4, 7.5 Hz, 3H), 7.11 (t, *J* = 7.3 Hz, 1H), 3.81 (s, 3H). **<sup>13</sup>C-NMR** (151 MHz, Chloroform-*d*)  $\delta$  160.40, 158.80, 138.76 (d, *J* = 3.0 Hz), 138.15 (d, *J* = 10.6 Hz), 137.40, 128.91, 128.81, 127.94, 127.70, 126.69, 126.21 (d, *J* = 1.5 Hz), 125.87, 125.17, 113.23 (d, *J* = 19.6 Hz), 101.93, 97.41 (d, *J* = 28.7 Hz), 33.39. **<sup>19</sup>F-NMR** (565 MHz, Chloroform-*d*)  $\delta$  -113.22. **HRMS (ESI)**: Calcd. for C<sub>21</sub>H<sub>16</sub>FNS<sub>2</sub> [M+H]<sup>+</sup>: 366.0781, found: 366.0777.

**(17) 4-chloro-1-methyl-3,5-bis(phenylthio)-1*H*-indole (3ma)**

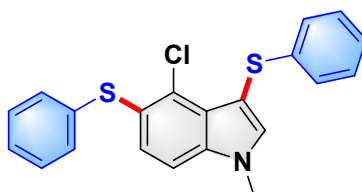

White solid, (65.7 mg, 69% yield), m.p.: 166-168 °C, <sup>1</sup>H-NMR (600 MHz, Chloroform-*d*) δ 7.35 (s, 1H), 7.31 (d, *J* = 8.6 Hz, 1H), 7.28–7.24 (m, 4H), 7.21 (dd, *J* = 14.1, 7.9 Hz, 4H), 7.14 (d, *J* = 7.4 Hz, 2H), 7.09 (t, *J* = 7.3 Hz, 1H), 3.81 (s, 3H). <sup>13</sup>C-NMR (151 MHz, Chloroform-*d*) δ 140.86, 138.46, 137.66, 136.62, 129.83, 129.61, 129.07, 128.68, 128.47, 126.82, 126.41, 126.06, 125.52, 124.85, 109.14, 101.83, 33.38. **HRMS (ESI)**: Calcd. for C<sub>21</sub>H<sub>16</sub>CINS<sub>2</sub> [M+H]<sup>+</sup>: 382.0485, found: 382.0482.

**(18) 6-bromo-1-methyl-3,5-bis(phenylthio)-1H-indole (3na)**

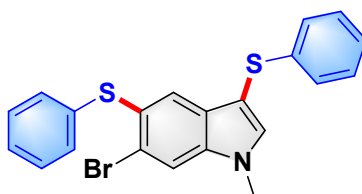

White solid, (68.9 mg, 65% yield), m.p.: 143-145 °C, <sup>1</sup>H-NMR (600 MHz, Chloroform-*d*) δ 7.77 (s, 1H), 7.73 (s, 1H), 7.33 (s, 1H), 7.23 (dd, *J* = 8.6, 4.8 Hz, 2H), 7.19–7.16 (m, 5H), 7.12–7.08 (m, 3H), 3.81 (s, 3H). <sup>13</sup>C-NMR (151 MHz, Chloroform-*d*) δ 138.54, 138.06, 136.95, 136.13, 129.92, 129.03, 128.93, 128.77, 126.61, 126.36, 126.21, 126.14, 125.21, 122.18, 114.88, 102.01, 33.37. **HRMS (ESI)**: Calcd. for C<sub>21</sub>H<sub>16</sub>BrNS<sub>2</sub> [M+H]<sup>+</sup>: 425.9980, found: 425.9977.

**(19) methyl 1-methyl-3,5-bis(phenylthio)-1H-indole-7-carboxylate (3oa)**

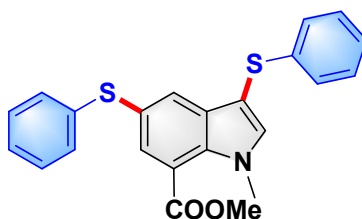

White solid, (24.3 mg, 24% yield), m.p.: 106-107 °C, <sup>1</sup>H-NMR (600 MHz, Chloroform-*d*) δ 8.10 (d, *J* = 7.1 Hz, 1H), 8.01 (d, *J* = 8.8 Hz, 1H), 7.76–7.71 (m, 2H), 7.69 (d, *J* = 8.0 Hz, 1H), 7.62 (s, 1H), 7.42 (d, *J* = 11.4 Hz, 2H), 7.38 (t, *J* = 7.0 Hz, 1H), 7.29 (t, *J* = 6.8 Hz, 1H), 6.99 (s, 1H), 3.69 (s, 3H), 2.13 (s, 3H). <sup>13</sup>C-NMR (151 MHz, Chloroform-*d*) δ 184.92, 183.57, 143.25, 142.92, 135.45, 135.25, 134.79, 133.60, 133.45, 132.69, 132.24, 131.37, 126.82, 125.94, 125.16, 123.75, 121.80, 120.54, 118.23, 110.20, 103.76, 30.03, 8.86. **HRMS (ESI)**: Calcd. for C<sub>23</sub>H<sub>19</sub>NO<sub>2</sub>S<sub>2</sub> [M+H]<sup>+</sup>: 406.0930, found: 406.0925

**(20) 1-methyl-3,5-bis(phenylthio)-1H-pyrrolo[2,3-*b*]pyridine (3pa)**

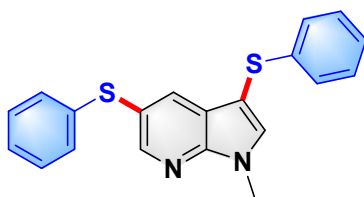

White solid, (53.1 mg, 61% yield), m.p.: 132-134 °C,  $^1\text{H-NMR}$  (600 MHz, Chloroform-*d*)  $\delta$  8.53 (s, 1H), 8.09 (s, 1H), 7.52 (s, 1H), 7.24–7.19 (m, 4H), 7.18–7.14 (m, 3H), 7.14–7.10 (m, 3H), 3.97 (s, 3H).  $^{13}\text{C-NMR}$  (151 MHz, Chloroform-*d*)  $\delta$  148.83, 148.00, 138.45, 138.09, 136.14, 133.85, 129.04, 128.88, 128.24, 126.26, 126.06, 125.34, 122.71, 122.36, 100.43, 31.68. **HRMS (ESI):** Calcd. for  $\text{C}_{20}\text{H}_{16}\text{N}_2\text{S}_2$   $[\text{M}+\text{H}]^+$ : 349.0828, found: 349.0824.

**(21) 1-methyl-3,5-bis(*p*-tolylthio)-1H-indole (3ab)**

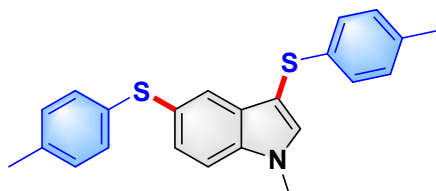

White solid, (76.9 mg, 82% yield), m.p.: 123-125 °C,  $^1\text{H-NMR}$  (500 MHz, Chloroform-*d*)  $\delta$  7.83 (s, 1H), 7.38 (d,  $J = 6.9$  Hz, 1H), 7.34 (t,  $J = 4.2$  Hz, 2H), 7.14 (d,  $J = 8.2$  Hz, 2H), 7.06 (td,  $J = 5.0, 2.3$  Hz, 4H), 7.02 (d,  $J = 8.1$  Hz, 2H), 3.83 (s, 3H), 2.33 (s, 3H), 2.30 (s, 3H).  $^{13}\text{C-NMR}$  (126 MHz, Chloroform-*d*)  $\delta$  137.14, 135.76, 135.56, 135.46, 135.05, 134.83, 130.65, 129.69, 129.54, 129.05, 127.82, 126.52, 125.65, 125.02, 110.79, 101.85, 33.27, 21.02, 20.93. **HRMS (ESI):** Calcd. for  $\text{C}_{23}\text{H}_{21}\text{NS}_2$   $[\text{M}+\text{H}]^+$ : 376.1188, found: 376.1183.

**(22) 3,5-bis((4-*tert*-butyl)phenylthio)-1-methyl-1H-indole (3ac)**

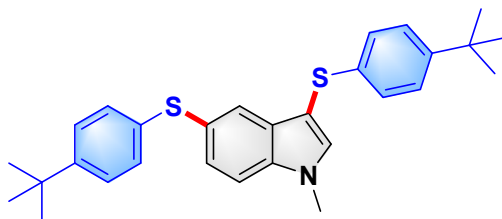

Yellow liquid, (78.0 mg, 68% yield),  $^1\text{H-NMR}$  (600 MHz, Chloroform-*d*)  $\delta$  7.89 (s, 1H), 7.42 (d,  $J = 6.9$  Hz, 1H), 7.36 (d,  $J = 9.9$  Hz, 2H), 7.27 (d,  $J = 8.5$  Hz, 2H), 7.24 (d,  $J = 8.5$  Hz, 2H), 7.16 (d,  $J = 8.5$  Hz, 2H), 7.10 (d,  $J = 8.5$  Hz, 2H), 3.85 (s, 3H), 1.32 (s, 9H), 1.30 (s, 9H).  $^{13}\text{C-NMR}$  (151 MHz, Chloroform-*d*)  $\delta$  148.90, 148.15, 137.22, 135.69, 135.66, 135.30, 130.86, 128.31, 128.23, 126.10, 125.91, 125.79, 125.52,

125.18, 110.74, 101.85, 34.41, 34.33, 33.24, 31.34, 31.32. **HRMS (ESI):** Calcd. for C<sub>29</sub>H<sub>33</sub>NS<sub>2</sub> [M+H]<sup>+</sup>: 460.2127, found: 460.2123.

**(23) 3,5-bis((4-methoxyphenyl)thio)-1-methyl-1H-indole (3ad)**

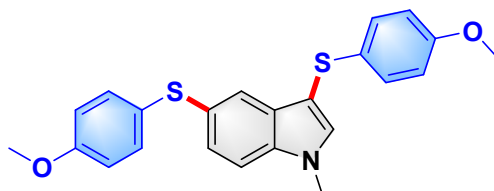

White liquid, (78.3 mg, 77% yield), <sup>1</sup>H-NMR (600 MHz, Chloroform-*d*) δ 7.76 (d, *J* = 1.1 Hz, 1H), 7.32–7.28 (m, 5H), 7.17 (d, *J* = 8.9 Hz, 2H), 6.84 (d, *J* = 8.9 Hz, 2H), 6.77 (d, *J* = 8.9 Hz, 2H), 3.81 (s, 3H), 3.77 (s, 6H). <sup>13</sup>C-NMR (151 MHz, Chloroform-*d*) δ 158.85, 158.00, 136.81, 135.04, 132.44, 130.47, 129.44, 129.07, 128.21, 127.47, 126.43, 123.24, 114.73, 114.55, 110.63, 102.97, 55.36, 33.15. **HRMS (ESI):** Calcd. for C<sub>23</sub>H<sub>21</sub>NO<sub>2</sub>S<sub>2</sub> [M+H]<sup>+</sup>: 408.1086, found: 408.1079.

**(24) 3,5-bis((4-fluorophenyl)thio)-1-methyl-1H-indole (3ae)**

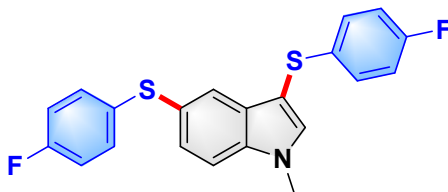

White solid, (66.1 mg, 69% yield), m.p.: 87-89 °C, <sup>1</sup>H-NMR (600 MHz, Chloroform-*d*) δ 7.72 (s, 1H), 7.36 (d, *J* = 4.4 Hz, 2H), 7.36 (s, 1H), 7.22–7.19 (m, 2H), 7.12–7.09 (m, 2H), 6.96–6.92 (m, 2H), 6.91–6.88 (m, 2H), 3.85 (s, 3H). <sup>13</sup>C-NMR (151 MHz, Chloroform-*d*) δ 162.13 (d, *J* = 83.1 Hz), 160.50 (d, *J* = 81.5 Hz), 137.20, 135.60, 133.86 (d, *J* = 3.0 Hz), 133.33 (d, *J* = 3.0 Hz), 131.16 (d, *J* = 7.6 Hz), 130.43, 128.25 (d, *J* = 7.6 Hz), 127.61, 125.94, 124.56, 115.97 (d, *J* = 21.1 Hz), 115.77 (d, *J* = 22.7 Hz), 110.92, 101.91, 33.27. <sup>19</sup>F-NMR (565 MHz, Chloroform-*d*) δ -116.23, -117.77. **HRMS (ESI):** Calcd. for C<sub>21</sub>H<sub>15</sub>F<sub>2</sub>NS<sub>2</sub> [M+H]<sup>+</sup>: 384.0687, found: 384.0684.

**(25) 3,5-bis((4-chlorophenyl)thio)-1-methyl-1H-indole (3af)**

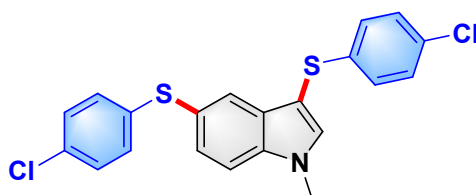

White solid, (77.8 mg, 75% yield), m.p.: 126-128 °C,  $^1\text{H-NMR}$  (400 MHz, Chloroform-*d*)  $\delta$  7.76 (s, 1H), 7.40 (s, 3H), 7.18 (d,  $J = 6.6$  Hz, 2H), 7.15 (d,  $J = 6.7$  Hz, 2H), 7.08 (d,  $J = 6.7$  Hz, 2H), 7.03 (d,  $J = 6.7$  Hz, 2H), 3.88 (s, 3H).  $^{13}\text{C-NMR}$  (101 MHz, Chloroform-*d*)  $\delta$  137.63, 137.60, 137.46, 136.02, 131.54, 130.79, 130.45, 129.40, 128.97, 128.83, 128.44, 127.27, 125.57, 124.50, 111.19, 100.85, 33.42. **HRMS (ESI):** Calcd. for  $\text{C}_{21}\text{H}_{15}\text{Cl}_2\text{NS}_2$   $[\text{M}+\text{H}]^+$ : 416.0096, found: 416.0090.

**(26) 3,5-bis((4-bromophenyl)thio)-1-methyl-1H-indole (3ag)**

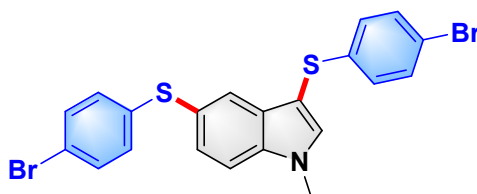

White solid, (67.8 mg, 54% yield), m.p.: 150-152 °C,  $^1\text{H-NMR}$  (400 MHz, Chloroform-*d*)  $\delta$  7.76 (d,  $J = 1.7$  Hz, 1H), 7.40 (d,  $J = 2.6$  Hz, 3H), 7.32 (d,  $J = 6.8$  Hz, 2H), 7.29 (d,  $J = 6.8$  Hz, 2H), 7.00 (d,  $J = 6.8$  Hz, 2H), 6.96 (d,  $J = 6.8$  Hz, 2H), 3.88 (s, 3H).  $^{13}\text{C-NMR}$  (101 MHz, Chloroform-*d*)  $\delta$  138.37, 138.36, 137.49, 136.07, 131.86, 131.71, 130.44, 129.54, 128.54, 127.55, 125.68, 124.26, 119.35, 118.57, 111.23, 100.69, 33.44. **HRMS (ESI):** Calcd. for  $\text{C}_{21}\text{H}_{15}\text{Br}_2\text{NS}_2$   $[\text{M}+\text{H}]^+$ : 503.9085, found: 503.9080.

**(27) 1-methyl-3,5-bis((4-nitrophenyl)thio)-1H-indole (3ah)**

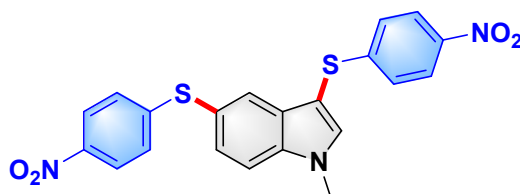

Yellow solid, (74.3 mg, 68% yield), m.p.: 96-97 °C,  $^1\text{H-NMR}$  (500 MHz, Chloroform-*d*)  $\delta$  8.02 (d,  $J = 2.4$  Hz, 2H), 8.00 (d,  $J = 2.4$  Hz, 2H), 7.80 (s, 1H), 7.55 (d,  $J = 8.5$  Hz, 1H), 7.51 (s, 1H), 7.49 (d,  $J = 6.9$  Hz, 1H), 7.13 (d,  $J = 8.9$  Hz, 2H), 7.08 (d,  $J = 8.9$  Hz, 2H), 3.98 (s, 3H).  $^{13}\text{C-NMR}$  (126 MHz, Chloroform-*d*)  $\delta$  150.10, 149.30, 145.09, 145.00, 138.20, 136.94, 130.52, 129.83, 127.00, 125.70, 125.05, 123.95, 123.92, 121.51, 112.02, 98.87, 33.66. **HRMS (ESI):** Calcd. for  $\text{C}_{21}\text{H}_{13}\text{N}_3\text{O}_4\text{S}_2$   $[\text{M}+\text{H}]^+$ : 438.0577, found: 438.0573.

**(28) 1-methyl-3,5-bis(*o*-tolylthio)-1H-indole (3ai)**

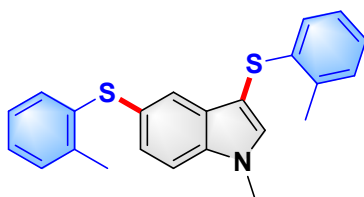

White solid, (70.3 mg, 75% yield), m.p.: 160-162 °C,  $^1\text{H-NMR}$  (600 MHz, Chloroform-*d*)  $\delta$  7.76 (s, 1H), 7.40 (d,  $J = 8.5$  Hz, 1H), 7.38–7.35 (m, 2H), 7.18 (d,  $J = 7.4$  Hz, 1H), 7.16 (d,  $J = 7.4$  Hz, 1H), 7.09 (t,  $J = 7.4$  Hz, 1H), 7.03 (q,  $J = 8.0$  Hz, 2H), 6.95 (t,  $J = 7.5$  Hz, 2H), 6.77 (d,  $J = 7.7$  Hz, 1H), 3.87 (s, 3H), 2.50 (s, 3H), 2.41 (s, 3H).  $^{13}\text{C-NMR}$  (151 MHz, Chloroform-*d*)  $\delta$  138.19, 137.76, 137.33, 136.61, 135.90, 134.48, 130.91, 130.10, 129.91, 128.63, 128.05, 126.40, 126.27, 125.78, 125.36, 124.62, 124.50, 110.97, 100.61, 33.34, 20.30, 19.94. **HRMS (ESI):** Calcd. for  $\text{C}_{23}\text{H}_{21}\text{NS}_2$   $[\text{M}+\text{H}]^+$ : 376.1188, found: 376.1183.

**(29) 3,5-bis((2-chlorophenyl)thio)-1-methyl-1H-indole (3aj)**

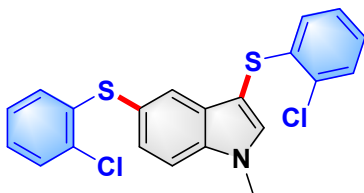

White solid, (73.7 mg, 71% yield), m.p.: 164-167 °C,  $^1\text{H-NMR}$  (400 MHz, Chloroform-*d*)  $\delta$  7.94–7.74 (m, 1H), 7.50–7.41 (m, 3H), 7.36–7.29 (m, 2H), 7.05–6.93 (m, 4H), 6.67 (ddd,  $J = 7.2, 3.4, 1.8$  Hz, 2H), 3.92 (s, 3H).  $^{13}\text{C-NMR}$  (101 MHz, Chloroform-*d*)  $\delta$  139.11, 138.21, 137.97, 136.62, 130.83, 130.16, 129.74, 129.38, 127.55, 127.38, 126.96, 126.91, 126.26, 125.92, 125.63, 122.32, 111.48, 99.68, 33.52. **HRMS (ESI):** Calcd. for  $\text{C}_{21}\text{H}_{15}\text{Cl}_2\text{NS}_2$   $[\text{M}+\text{H}]^+$ : 416.0096, found: 416.0091.

**(30) 1-methyl-3,5-bis(*m*-tolylthio)-1H-indole (3ak)**

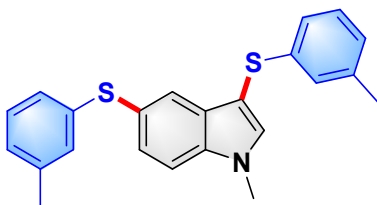

White solid, (62.8 mg, 67% yield), m.p.: 116-118 °C,  $^1\text{H-NMR}$  (600 MHz, Chloroform-*d*)  $\delta$  7.93 (d,  $J = 1.4$  Hz, 1H), 7.46 (d,  $J = 6.8$  Hz, 1H), 7.39 (d,  $J = 8.5$  Hz, 1H), 7.37 (s, 1H), 7.15 (t,  $J = 7.7$  Hz, 1H), 7.12–7.09 (m, 2H), 7.05 (s, 1H), 7.02 (d,  $J = 7.9$  Hz, 1H), 6.99 (d,  $J = 7.5$  Hz, 1H), 6.97 (d,  $J = 8.0$  Hz, 1H), 6.94 (d,  $J = 7.5$  Hz, 1H), 3.84 (s, 3H), 2.31 (s, 3H), 2.30 (s, 3H).  $^{13}\text{C-NMR}$  (151 MHz, Chloroform-*d*)  $\delta$  139.00, 138.87, 138.66, 138.53, 137.39, 135.87, 130.85, 128.83, 128.76, 128.67, 128.50, 126.71, 126.60, 126.00,

125.80, 125.33, 124.77, 123.25, 110.95, 101.43, 33.28, 21.43, 21.38. **HRMS (ESI)**: Calcd. for C<sub>23</sub>H<sub>21</sub>NS<sub>2</sub> [M+H]<sup>+</sup>: 376.1188, found: 376.1185.

**(31) 3,5-bis((3-bromophenyl)thio)-1-methyl-1*H*-indole (3al)**

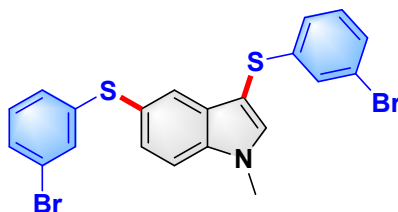

White solid, (75.3 mg, 60% yield), m.p.: 120-121 °C, **<sup>1</sup>H-NMR** (400 MHz, Chloroform-*d*) δ 7.84 (d, *J* = 8.5 Hz, 1H), 7.43 (t, *J* = 9.5 Hz, 3H), 7.24 (dd, *J* = 11.5, 5.7 Hz, 4H), 7.10–7.01 (m, 4H), 3.91 (s, 3H). **<sup>13</sup>C-NMR** (101 MHz, Chloroform-*d*) δ 142.00, 141.71, 137.70, 136.35, 130.58, 130.15, 130.12, 130.11, 129.86, 129.11, 128.40, 128.19, 128.02, 126.36, 125.94, 124.34, 123.38, 122.99, 111.43, 100.20, 33.51. **HRMS (ESI)**: Calcd. for C<sub>21</sub>H<sub>15</sub>Br<sub>2</sub>NS<sub>2</sub> [M+H]<sup>+</sup>: 503.9085, found: 503.9081.

**(32) 3,5-bis((2,4-dimethylphenyl)thio)-1-methyl-1*H*-indole (3am)**

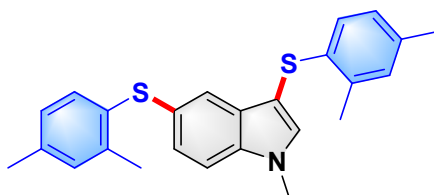

White solid, (81.6 mg, 81% yield), m.p.: 137-139 °C, **<sup>1</sup>H-NMR** (600 MHz, Chloroform-*d*) δ 7.66 (s, 1H), 7.33 (d, *J* = 6.3 Hz, 1H), 7.31 (s, 1H), 7.28 (d, *J* = 4.8 Hz, 1H), 7.04–6.97 (m, 3H), 6.88 (t, *J* = 6.8 Hz, 1H), 6.77 (t, *J* = 6.6 Hz, 1H), 6.74–6.71 (m, 1H), 3.84 (s, 3H), 2.46 (s, 3H), 2.36 (s, 3H), 2.32 (s, 3H), 2.28 (s, 3H). **<sup>13</sup>C-NMR** (151 MHz, Chloroform-*d*) δ 137.77, 136.96, 136.28, 135.40, 134.84, 134.50, 134.44, 133.26, 131.15, 130.85, 130.78, 130.51, 127.22, 127.03, 126.77, 126.34, 125.88, 123.84, 110.70, 101.36, 33.22, 20.92, 20.76, 20.33, 19.92. **HRMS (ESI)**: Calcd. for C<sub>25</sub>H<sub>25</sub>NS<sub>2</sub> [M+H]<sup>+</sup>: 404.1501, found: 404.1497.

**(33) 1-methyl-3,5-bis(naphthalen-2-ylthio)-1*H*-indole (3an)**

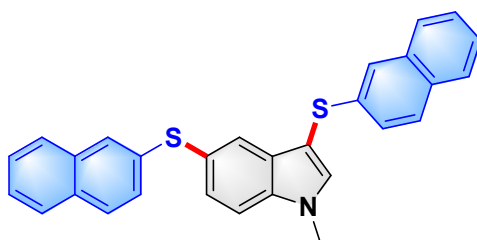

White solid, (80.5 mg, 72% yield), m.p.: 142-143 °C,  $^1\text{H-NMR}$  (600 MHz, Chloroform-*d*)  $\delta$  7.94 (s, 1H), 7.74 (ddd,  $J = 14.0, 6.3, 3.3$  Hz, 2H), 7.66 (d,  $J = 8.6$  Hz, 1H), 7.62–7.58 (m, 4H), 7.53 (s, 1H), 7.47 (d,  $J = 6.9$  Hz, 1H), 7.43–7.39 (m, 6H), 7.31 (d,  $J = 6.8$  Hz, 1H), 7.28 (s, 1H), 3.85 (s, 3H).  $^{13}\text{C-NMR}$  (151 MHz, Chloroform-*d*)  $\delta$  136.63, 136.29, 135.92, 133.82, 133.77, 131.70, 131.47, 130.78, 128.41, 128.34, 128.33, 127.73, 127.68, 127.15, 126.96, 126.72, 126.41, 126.39, 125.55, 125.49, 125.17, 124.97, 124.91, 123.81, 111.04, 101.33, 33.32. **HRMS (ESI):** Calcd. for  $\text{C}_{29}\text{H}_{21}\text{NS}_2$   $[\text{M}+\text{H}]^+$ : 448.1188, found: 448.1184.

**(34) 1-methyl-3,5-bis(phenylselanyl)-1*H*-indole (3ao)**

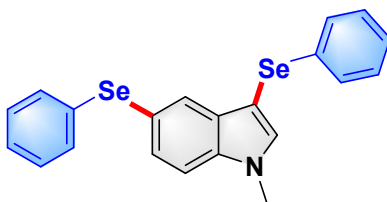

Brown solid, (89.5 mg, 81% yield), m.p.: 107-109 °C,  $^1\text{H-NMR}$  (600 MHz, Chloroform-*d*)  $\delta$  7.99 (s, 1H), 7.53 (d,  $J = 6.9$  Hz, 1H), 7.36–7.33 (m, 4H), 7.29–7.27 (m, 2H), 7.21–7.13 (m, 6H), 3.85 (s, 3H).  $^{13}\text{C-NMR}$  (151 MHz, Chloroform-*d*)  $\delta$  137.28, 136.25, 133.79, 133.75, 131.83, 130.75, 129.54, 129.06, 128.99, 128.95, 127.81, 126.24, 125.79, 120.27, 110.77, 96.46, 33.18. **HRMS (ESI):** Calcd. for  $\text{C}_{21}\text{H}_{17}\text{NSe}_2$   $[\text{M}+\text{H}]^+$ : 443.9764, found: 443.9759.

**(35) 1-methyl-3,5-bis(*p*-tolylselanyl)-1*H*-indole (3ap)**

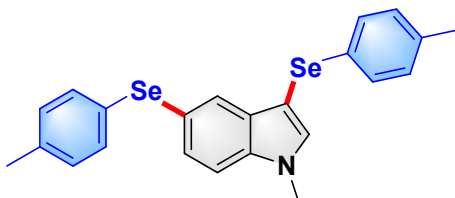

White solid, (81.2 mg, 69% yield), m.p.: 112-113 °C,  $^1\text{H-NMR}$  (600 MHz, Chloroform-*d*)  $\delta$  7.98 (s, 1H), 7.49 (d,  $J = 6.9$  Hz, 1H), 7.32 (s, 1H), 7.32–7.29 (m, 3H), 7.21 (d,  $J = 8.1$  Hz, 2H), 7.05 (d,  $J = 7.9$  Hz, 2H), 7.00 (d,  $J = 7.9$  Hz, 2H), 3.82 (s, 3H), 2.33 (s, 3H), 2.30 (s, 3H).  $^{13}\text{C-NMR}$  (151 MHz, Chloroform-*d*)  $\delta$  137.11, 136.31, 135.94, 135.65, 131.78, 131.53, 129.91, 129.85, 129.81, 129.63, 129.45, 128.95, 127.15, 120.98, 110.63, 96.91, 33.12, 21.07, 20.99. **HRMS (ESI):** Calcd. for  $\text{C}_{23}\text{H}_{21}\text{NSe}_2$   $[\text{M}+\text{H}]^+$ : 472.0077, found: 472.0072.

**(36) 3,5-bis((4-fluorophenyl)selanyl)-1-methyl-1*H*-indole (3aq)**



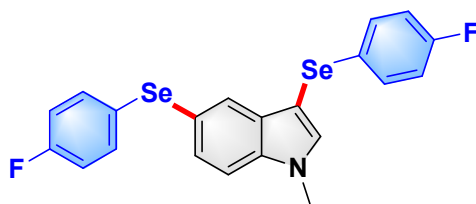

White solid, (75.4 mg, 63% yield), m.p.: 106-109 °C,  $^1\text{H-NMR}$  (400 MHz, Chloroform-*d*)  $\delta$  7.89 (s, 1H), 7.48 (d,  $J = 8.5$  Hz, 1H), 7.34 (q,  $J = 8.7, 7.7$  Hz, 4H), 7.25 (dd,  $J = 8.1, 5.6$  Hz, 2H), 6.90 (dt,  $J = 19.4, 8.6$  Hz, 4H), 3.85 (s, 3H).  $^{13}\text{C-NMR}$  (101 MHz, Chloroform-*d*)  $\delta$  163.05 (d,  $J = 39.4$  Hz), 160.61 (d,  $J = 37.4$  Hz), 137.16, 136.10, 133.47 (d,  $J = 7.1$  Hz), 131.54, 131.05 (d,  $J = 8.1$  Hz), 128.87, 127.80 (d,  $J = 17.2$  Hz), 126.85, 121.10, 116.35, 116.17 (d,  $J = 6.1$  Hz), 115.99, 110.88, 96.76, 33.23.  $^{19}\text{F-NMR}$  (376 MHz, Chloroform-*d*)  $\delta$  -115.65, -116.79. **HRMS (ESI):** Calcd. for  $\text{C}_{21}\text{H}_{15}\text{F}_2\text{NSe}_2$   $[\text{M}+\text{H}]^+$ : 479.9576, found: 479.9570.

**(37) 3,5-bis((4-chlorophenyl)selanyl)-1-methyl-1H-indole (3ar)**

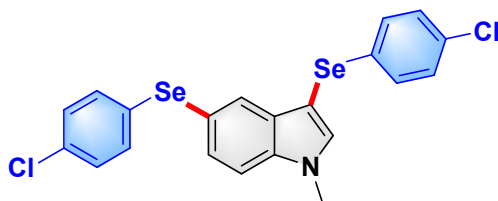

White solid, (100.7 mg, 79% yield), m.p.: 116-118 °C,  $^1\text{H-NMR}$  (600 MHz, Chloroform-*d*)  $\delta$  7.87 (s, 1H), 7.49 (d,  $J = 7.1$  Hz, 1H), 7.37 (s, 1H), 7.34 (d,  $J = 8.5$  Hz, 1H), 7.24 (d,  $J = 8.5$  Hz, 2H), 7.17–7.14 (m, 4H), 7.12 (d,  $J = 8.6$  Hz, 2H), 3.87 (s, 3H).  $^{13}\text{C-NMR}$  (151 MHz, Chloroform-*d*)  $\delta$  137.35, 136.31, 132.44, 132.14, 131.89, 131.87, 131.85, 131.58, 130.24, 129.42, 129.16, 129.05, 127.50, 120.28, 110.95, 96.22, 33.24. **HRMS (ESI):** Calcd. for  $\text{C}_{21}\text{H}_{15}\text{Cl}_2\text{NSe}_2$   $[\text{M}+\text{H}]^+$ : 511.8985, found: 511.8975.

**(38) 3,5-bis((4-bromophenyl)selanyl)-1-methyl-1H-indole (3as)**

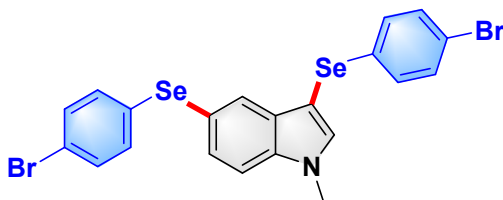

White solid, (61.4 mg, 41% yield), m.p.: 126-127 °C,  $^1\text{H-NMR}$  (600 MHz, Chloroform-*d*)  $\delta$  7.89 (s, 1H), 7.50 (d,  $J = 6.3$  Hz, 1H), 7.37–7.34 (m, 2H), 7.32–7.29 (m, 2H), 7.27–7.25 (m, 2H), 7.16 (dq,  $J = 5.9, 1.9$  Hz, 2H), 7.09 (dq,  $J = 6.5, 2.1$  Hz, 2H), 3.86 (s, 3H).  $^{13}\text{C-NMR}$  (151 MHz, Chloroform-*d*)  $\delta$  137.39, 136.39,

132.73, 132.33, 132.09, 131.97, 131.58, 130.52, 129.53, 127.61, 120.38, 120.10, 119.74, 111.03, 96.08, 33.27. **HRMS (ESI):** Calcd. for  $C_{21}H_{15}Br_2NSe_2$   $[M+H]^+$ : 599.7962, found: 599.7958.

**(39) 1-methyl-3,5-bis((4-(trifluoromethyl)phenyl)selanyl)-1H-indole (3at)**

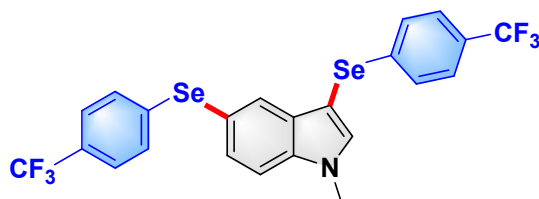

Yellow solid, (92.6 mg, 64% yield), m.p.: 129-131 °C,  $^1H$ -NMR (600 MHz, Chloroform-*d*)  $\delta$  7.94 (s, 1H), 7.57 (d,  $J$  = 8.5 Hz, 1H), 7.43 (t,  $J$  = 4.2 Hz, 2H), 7.39 (dd,  $J$  = 8.1, 5.2 Hz, 4H), 7.31 (dd,  $J$  = 14.8, 8.2 Hz, 4H), 3.92 (s, 3H).  $^{13}C$ -NMR (151 MHz, Chloroform-*d*)  $\delta$  139.68, 139.40, 137.70, 136.86, 131.72, 130.33, 129.53, 128.49, 128.27, 128.23, 128.03 (d,  $J$  = 4.5 Hz), 127.83, 125.65 (d,  $J$  = 3.0 Hz), 125.09 (d,  $J$  = 3.0 Hz), 123.29 (d,  $J$  = 3.0 Hz), 118.91, 111.30, 95.30, 33.31.  $^{19}F$ -NMR (565 MHz, Chloroform-*d*)  $\delta$  -62.51, -62.56. **HRMS (ESI):** Calcd. for  $C_{23}H_{15}F_6NSe_2$   $[M+H]^+$ : 579.9512, found: 579.9506.

**(40) 1-methyl-2,3-bis(phenylthio)-1H-indole (4aa)**

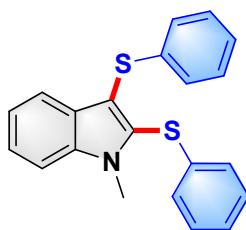

Known compound, (79.4 mg, 91% yield),  $^1H$ -NMR (500 MHz, Chloroform-*d*)  $\delta$  7.77 (d,  $J$  = 8.0 Hz, 1H), 7.46 (d,  $J$  = 8.3 Hz, 1H), 7.42 (t,  $J$  = 7.0 Hz, 1H), 7.25 (ddd,  $J$  = 14.7, 6.6, 1.2 Hz, 3H), 7.20 (d,  $J$  = 4.3 Hz, 5H), 7.15–7.09 (m, 3H), 3.86 (s, 3H).  $^{13}C$ -NMR (126 MHz, Chloroform-*d*)  $\delta$  138.62, 138.59, 135.92, 134.38, 129.29, 129.28, 128.77, 127.49, 126.68, 126.30, 125.10, 124.10, 121.19, 120.46, 111.15, 110.32, 31.20. Calcd. for  $C_{21}H_{17}NS_2$ .

**(41) 2,3-bis(phenylthio)-1H-indole (4ba)**

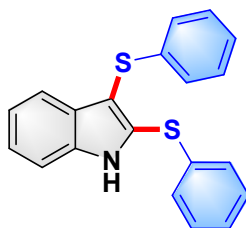

Known compound, (78.7 mg, 85% yield),  $^1\text{H-NMR}$  (500 MHz, Chloroform-*d*)  $\delta$  8.35 (s, 1H), 7.67 (d,  $J$  = 7.9 Hz, 1H), 7.35 (d,  $J$  = 8.2 Hz, 1H), 7.33–7.25 (m, 6H), 7.20 (td,  $J$  = 7.4, 6.6, 3.5 Hz, 5H), 7.14–7.09 (m, 1H).  $^{13}\text{C-NMR}$  (126 MHz, Chloroform-*d*)  $\delta$  138.12, 136.95, 134.45, 133.63, 130.02, 129.70, 129.47, 128.82, 127.31, 126.65, 125.18, 123.96, 121.31, 119.98, 111.28. Calcd. for  $\text{C}_{20}\text{H}_{15}\text{NS}_2$ .

**(42) 5-methoxy-1-methyl-2,3-bis(phenylthio)-1*H*-indole (4ca)**

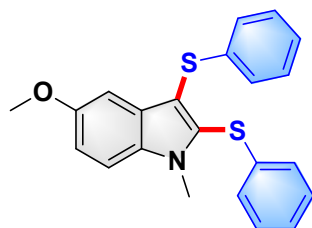

White solid, (82.0 mg, 87% yield), m.p.: 149–151 °C,  $^1\text{H-NMR}$  (500 MHz, Chloroform-*d*)  $\delta$  7.33 (d,  $J$  = 8.9 Hz, 1H), 7.22–7.17 (m, 3H), 7.16–7.11 (m, 5H), 7.08 (d,  $J$  = 7.4 Hz, 3H), 7.04 (d,  $J$  = 6.4 Hz, 1H), 3.84 (s, 3H), 3.81 (s, 3H).  $^{13}\text{C-NMR}$  (126 MHz, Chloroform-*d*)  $\delta$  155.31, 138.64, 136.01, 134.28, 133.69, 129.92, 129.19, 128.69, 127.34, 126.39, 126.16, 124.94, 114.99, 111.21, 110.05, 100.99, 55.84, 31.28. **HRMS (ESI):** Calcd. for  $\text{C}_{22}\text{H}_{19}\text{NOS}_2$   $[\text{M}+\text{H}]^+$ : 378.0981, found: 378.0975.

**(43) 1,2-bis(phenylthio)-5,6-dihydro-4*H*-pyrrolo[3,2,1-*ij*]quinoline (4da)**

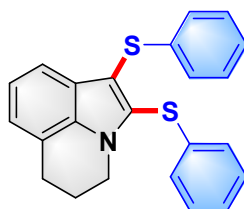

White solid, (77.4 mg, 83% yield), m.p.: 120–121 °C,  $^1\text{H-NMR}$  (500 MHz, Chloroform-*d*)  $\delta$  7.50 (d,  $J$  = 8.0 Hz, 1H), 7.24–7.18 (m, 6H), 7.17–7.07 (m, 6H), 4.14–4.10 (m, 2H), 3.04 (t,  $J$  = 6.1 Hz, 2H), 2.24 (p,  $J$  = 6.0 Hz, 2H).  $^{13}\text{C-NMR}$  (126 MHz, Chloroform-*d*)  $\delta$  138.82, 135.99, 135.91, 132.37, 129.20, 128.69, 127.59, 127.54, 126.69, 126.21, 124.99, 122.42, 121.18, 120.74, 117.66, 109.97, 43.11, 24.81, 22.75. **HRMS (ESI):** Calcd. for  $\text{C}_{23}\text{H}_{19}\text{NS}_2$   $[\text{M}+\text{H}]^+$ : 374.1032, found: 374.1027.

**(44) 4-methyl-2,3-bis(phenylthio)-1*H*-indole (4ea)**

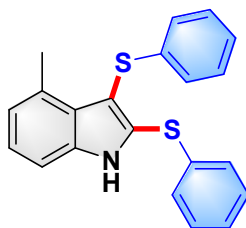

White solid, (70.36 mg, 81% yield), m.p.: 113-115 °C,  $^1\text{H-NMR}$  (500 MHz, Chloroform-*d*)  $\delta$  8.39 (s, 1H), 7.35–7.25 (m, 5H), 7.23–7.16 (m, 4H), 7.14–7.07 (m, 3H), 6.96 (d,  $J = 5.1$  Hz, 1H), 2.73 (s, 3H).  $^{13}\text{C-NMR}$  (126 MHz, Chloroform-*d*)  $\delta$  140.41, 137.27, 134.95, 134.35, 132.05, 129.95, 129.46, 128.87, 128.07, 127.35, 125.54, 124.74, 123.75, 123.00, 109.09, 107.96, 18.77. **HRMS (ESI)**: Calcd. for  $\text{C}_{21}\text{H}_{17}\text{NS}_2$   $[\text{M}+\text{H}]^+$ : 348.0875, found: 348.0871.

**(45) 6-fluoro-2,3-bis(phenylthio)-1H-indole (4fa)**

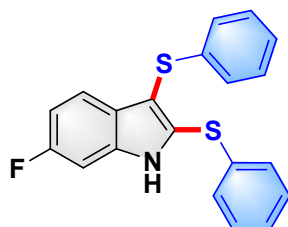

Known compound, (68.5 mg, 78% yield),  $^1\text{H-NMR}$  (500 MHz, Chloroform-*d*)  $\delta$  8.39 (s, 1H), 7.52 (d,  $J = 5.3$  Hz, 1H), 7.32–7.23 (m, 5H), 7.22–7.09 (m, 5H), 7.03 (d,  $J = 9.2$  Hz, 1H), 6.98–6.92 (m, 1H).  $^{13}\text{C-NMR}$  (126 MHz, Chloroform-*d*)  $\delta$  160.89 (d,  $J = 241.9$  Hz), 137.74, 136.81 (d,  $J = 12.6$  Hz), 134.32, 133.66 (d,  $J = 3.8$  Hz), 129.64, 129.47, 128.85, 127.36, 126.73, 126.40, 125.34, 121.01 (d,  $J = 10.1$  Hz), 110.19 (d,  $J = 25.2$  Hz), 109.82, 97.77 (d,  $J = 27.7$  Hz).  $^{19}\text{F-NMR}$  (471 MHz, Chloroform-*d*)  $\delta$  -117.83. Calcd. for  $\text{C}_{20}\text{H}_{14}\text{FNS}_2$ .

**(46) 4-chloro-2,3-bis(phenylthio)-1H-indole (4ga)**

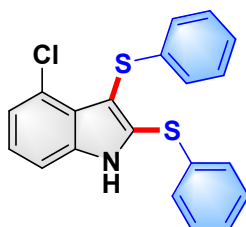

White solid, (76.1 mg, 83% yield), m.p.: 141-144 °C,  $^1\text{H-NMR}$  (500 MHz, Chloroform-*d*)  $\delta$  8.46 (s, 1H), 7.36 (dd,  $J = 7.6, 2.0$  Hz, 2H), 7.34–7.29 (m, 3H), 7.24–7.17 (m, 5H), 7.16–7.13 (m, 2H), 7.11 (t,  $J = 7.1$  Hz, 1H).  $^{13}\text{C-NMR}$  (126 MHz, Chloroform-*d*)  $\delta$  139.91, 138.14, 137.59, 133.01, 130.93, 129.69, 128.79,

128.01, 126.43, 126.25, 126.23, 124.99, 123.95, 122.72, 110.02, 106.67. **HRMS (ESI):** Calcd. for  $C_{20}H_{14}ClNS_2$   $[M+H]^+$ : 368.0329, found: 368.0324.

**(47) 5-bromo-2,3-bis(phenylthio)-1H-indole (4ha)**

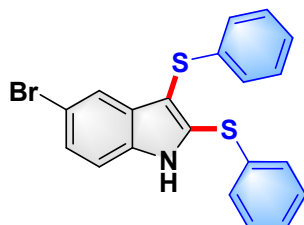

Known compound, (63.7 mg, 62% yield),  **$^1H$ -NMR** (500 MHz, Chloroform-*d*)  $\delta$  8.32 (s, 1H), 7.76 (s, 1H), 7.33 (dtd,  $J$  = 12.7, 7.0, 2.0 Hz, 6H), 7.22–7.18 (m, 3H), 7.13 (dd,  $J$  = 8.1, 1.9 Hz, 3H).  **$^{13}C$ -NMR** (126 MHz, Chloroform-*d*)  $\delta$  137.61, 136.04, 135.38, 133.25, 131.89, 130.56, 129.61, 128.89, 127.85, 126.68, 126.58, 125.37, 122.22, 114.79, 112.53, 107.71. Calcd. for  $C_{20}H_{14}BrNS_2$ .

**(48) methyl 2,3-bis(phenylthio)-1H-indole-7-carboxylate (4ia)**

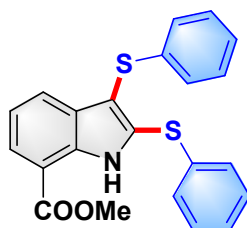

White solid, (41.0 mg, 42% yield), m.p.: 157-159 °C,  **$^1H$ -NMR** (500 MHz, Chloroform-*d*)  $\delta$  9.98 (s, 1H), 7.94 (d,  $J$  = 6.7 Hz, 1H), 7.82 (d,  $J$  = 7.9 Hz, 1H), 7.37 (d,  $J$  = 6.8 Hz, 2H), 7.32–7.27 (m, 3H), 7.17 (s, 3H), 7.15–7.08 (m, 3H), 3.97 (s, 3H).  **$^{13}C$ -NMR** (126 MHz, Chloroform-*d*)  $\delta$  167.31, 137.86, 136.73, 135.72, 133.55, 131.07, 130.33, 129.50, 128.81, 127.66, 126.62, 125.78, 125.26, 120.57, 112.84, 108.62, 52.09. **HRMS (ESI):** Calcd. for  $C_{22}H_{17}NO_2S_2$   $[M+H]^+$ : 392.0773, found: 392.0767.

**(49) 2,3-bis(phenylthio)-1H-indole-5-carbonitrile (4ja)**

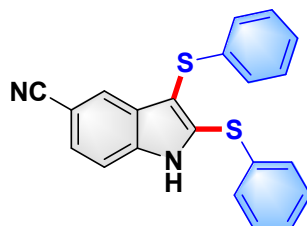

Known compound, (36.7 mg, 41% yield),  **$^1H$ -NMR** (500 MHz, Chloroform-*d*)  $\delta$  8.70 (s, 1H), 7.91 (s, 1H), 7.45 (d,  $J$  = 8.4 Hz, 1H), 7.41–7.37 (m, 3H), 7.36–7.31 (m, 3H), 7.24–7.20 (m, 2H), 7.16–7.13 (m, 3H).  **$^{13}C$ -NMR** (126 MHz, Chloroform-*d*)  $\delta$  137.61, 136.04, 135.38, 133.25, 131.89, 130.56, 129.61, 128.89, 127.85, 126.68, 126.58, 125.37, 122.22, 114.79, 112.53, 107.71. Calcd. for  $C_{20}H_{14}ClNS_2$   $[M+H]^+$ : 368.0329, found: 368.0324.

**NMR** (126 MHz, Chloroform-*d*)  $\delta$  138.47, 138.19, 136.95, 132.24, 131.37, 130.03, 129.79, 129.02, 128.39, 126.95, 126.35, 125.78, 124.90, 120.04, 112.04, 108.45, 104.42. Calcd. for C<sub>21</sub>H<sub>14</sub>N<sub>2</sub>S<sub>2</sub>.

**(50) 5-nitro-2,3-bis(phenylthio)-1H-indole (4ka)**

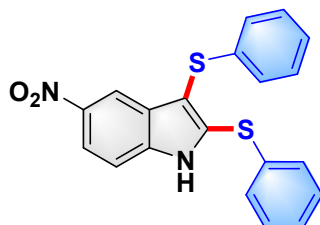

Known compound, (44.4 mg, 47% yield), **<sup>1</sup>H-NMR** (500 MHz, Chloroform-*d*)  $\delta$  8.53 (d, *J* = 2.2 Hz, 2H), 8.14 (d, *J* = 6.7 Hz, 1H), 7.44–7.41 (m, 2H), 7.39–7.35 (m, 4H), 7.24–7.21 (m, 2H), 7.18–7.13 (m, 3H). **<sup>13</sup>C-NMR** (126 MHz, Chloroform-*d*)  $\delta$  142.96, 139.55, 139.35, 136.85, 131.82, 131.65, 129.93, 129.89, 129.03, 128.61, 127.08, 125.85, 118.99, 116.41, 111.12, 109.70. Calcd. for C<sub>20</sub>H<sub>14</sub>N<sub>2</sub>O<sub>2</sub>S<sub>2</sub>.

**(51) 1-methyl-2,3-bis(*p*-tolylthio)-1H-indole (4ab)**

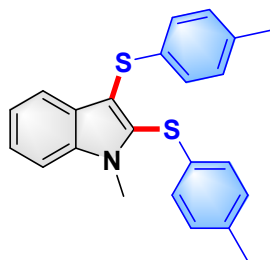

Known compound, (81.6 mg, 87% yield), **<sup>1</sup>H-NMR** (500 MHz, Chloroform-*d*)  $\delta$  7.78–7.74 (m, 1H), 7.43 (d, *J* = 7.6 Hz, 1H), 7.41–7.37 (m, 1H), 7.27–7.23 (m, 1H), 7.12 (s, 2H), 7.08–7.05 (m, 4H), 7.02 (s, 2H), 3.85 (s, 3H), 2.35–2.31 (m, 6H). **<sup>13</sup>C-NMR** (126 MHz, Chloroform-*d*)  $\delta$  138.49, 136.29, 135.02, 134.88, 134.82, 132.28, 130.02, 129.52, 129.28, 127.98, 127.12, 123.90, 121.01, 120.42, 111.43, 110.19, 31.15, 21.03, 20.99. Calcd. for C<sub>23</sub>H<sub>21</sub>NS<sub>2</sub>.

**(52) 2,3-bis((4-*tert*-butyl)phenylthio)-1-methyl-1H-indole (4ac)**

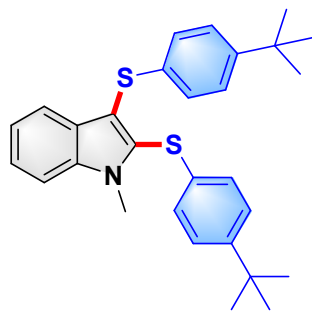

White solid, (83.8 mg, 73% yield), m.p.: 96-99 °C,  $^1\text{H-NMR}$  (500 MHz, Chloroform-*d*)  $\delta$  7.76 (d,  $J$  = 8.0 Hz, 1H), 7.42 (d,  $J$  = 8.2 Hz, 1H), 7.37 (t,  $J$  = 7.1 Hz, 1H), 7.26–7.20 (m, 5H), 7.13 (d,  $J$  = 8.5 Hz, 2H), 7.06 (d,  $J$  = 8.5 Hz, 2H), 3.85 (s, 3H), 1.30 (d,  $J$  = 1.8 Hz, 18H).  $^{13}\text{C-NMR}$  (126 MHz, Chloroform-*d*)  $\delta$  149.51, 148.15, 138.44, 135.18, 134.87, 132.34, 129.38, 127.68, 126.78, 126.25, 125.75, 123.86, 120.96, 120.47, 111.41, 110.13, 34.46, 34.35, 31.36, 31.28, 31.17. **HRMS (ESI)**: Calcd. for  $\text{C}_{29}\text{H}_{33}\text{NS}_2$   $[\text{M}+\text{H}]^+$ : 460.2127, found: 460.2121.

**(53) 2,3-bis((4-methoxyphenyl)thio)-1-methyl-1H-indole (4ad)**

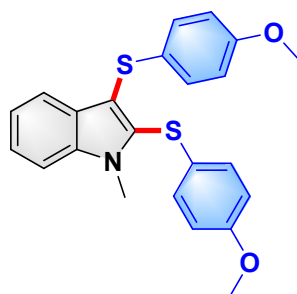

Known compound, (89.5 mg, 88% yield),  $^1\text{H-NMR}$  (500 MHz, Chloroform-*d*)  $\delta$  7.77–7.69 (m, 1H), 7.39–7.32 (m, 2H), 7.24–7.16 (m, 3H), 7.13 (ddd,  $J$  = 8.6, 3.9, 2.0 Hz, 2H), 6.78–6.72 (m, 4H), 3.83 (s, 3H), 3.77 (s, 3H), 3.76 (s, 3H).  $^{13}\text{C-NMR}$  (126 MHz, Chloroform-*d*)  $\delta$  158.75, 157.98, 138.26, 135.39, 130.51, 129.53, 129.19, 129.13, 126.10, 123.77, 120.92, 120.28, 114.88, 114.45, 111.97, 110.09, 55.35, 55.32, 31.09. Calcd. for  $\text{C}_{23}\text{H}_{21}\text{NO}_2\text{S}_2$ .

**(54) 2,3-bis((4-fluorophenyl)thio)-1-methyl-1H-indole (4ae)**

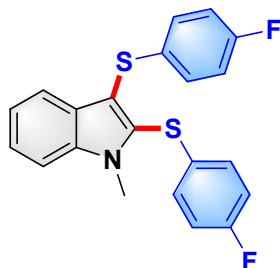

Brown solid, (78.5 mg, 87% yield), m.p.: 109-111 °C,  $^1\text{H-NMR}$  (500 MHz, Chloroform-*d*)  $\delta$  7.73 (d,  $J$  = 8.0 Hz, 1H), 7.44 (d,  $J$  = 8.2 Hz, 1H), 7.40 (t,  $J$  = 7.0 Hz, 1H), 7.26 (t,  $J$  = 6.8 Hz, 1H), 7.16–7.13 (m, 2H), 7.10 (ddt,  $J$  = 8.2, 5.2, 2.6 Hz, 2H), 6.91 (dddd,  $J$  = 22.0, 8.8, 6.1, 2.1 Hz, 4H), 3.86 (s, 3H).  $^{13}\text{C-NMR}$  (126 MHz, Chloroform-*d*)  $\delta$  162.41 (d,  $J$  = 71.8 Hz), 160.45 (d,  $J$  = 70.6 Hz), 138.43, 134.57, 133.41 (d,  $J$  = 3.8 Hz), 130.66 (d,  $J$  = 2.5 Hz), 129.92 (d,  $J$  = 7.6 Hz), 129.08, 128.93 (d,  $J$  = 7.6 Hz), 124.24, 121.32, 120.25, 116.40 (d,  $J$  = 22.7 Hz), 115.80 (d,  $J$  = 22.7 Hz), 111.53, 110.35, 31.16.  $^{19}\text{F-NMR}$  (471 MHz, Chloroform-*d*)  $\delta$  -115.20, -117.37. **HRMS (ESI):** Calcd. for  $\text{C}_{21}\text{H}_{15}\text{F}_2\text{NS}_2$   $[\text{M}+\text{H}]^+$ : 384.0687, found: 384.0681.

**(55) 2,3-bis((4-chlorophenyl)thio)-1-methyl-1*H*-indole (4af)**

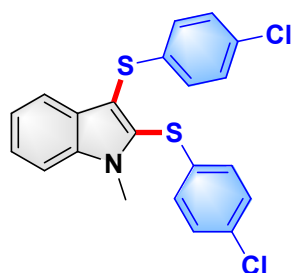

Known compound, (87.1 mg, 84% yield),  $^1\text{H-NMR}$  (500 MHz, Chloroform-*d*)  $\delta$  7.72 (d,  $J$  = 8.0 Hz, 1H), 7.46 (d,  $J$  = 8.2 Hz, 1H), 7.42 (t,  $J$  = 7.5 Hz, 1H), 7.28 (t,  $J$  = 7.4 Hz, 1H), 7.19 (d,  $J$  = 8.5 Hz, 2H), 7.14 (d,  $J$  = 8.6 Hz, 2H), 7.06 (d,  $J$  = 8.5 Hz, 2H), 7.01 (d,  $J$  = 8.5 Hz, 2H), 3.86 (s, 3H).  $^{13}\text{C-NMR}$  (126 MHz, Chloroform-*d*)  $\delta$  138.56, 137.05, 134.27, 133.94, 132.45, 131.03, 129.41, 129.06, 128.85, 128.79, 127.95, 124.43, 121.50, 120.29, 110.93, 110.48, 31.23. Calcd. for  $\text{C}_{21}\text{H}_{15}\text{Cl}_2\text{NS}_2$ .

**(56) 2,3-bis((4-bromophenyl)thio)-1-methyl-1*H*-indole (4ag)**

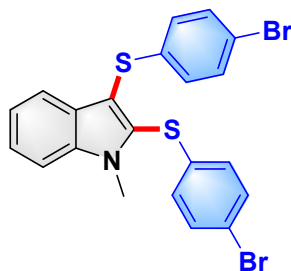

Known compound, (96.8 mg, 77% yield),  $^1\text{H-NMR}$  (500 MHz, Chloroform-*d*)  $\delta$  7.67 (d,  $J$  = 8.0 Hz, 1H), 7.45 (d,  $J$  = 8.2 Hz, 1H), 7.42–7.38 (m, 1H), 7.31 (d,  $J$  = 8.6 Hz, 2H), 7.27–7.23 (m, 3H), 6.95 (d,  $J$  = 8.6 Hz, 2H), 6.91 (d,  $J$  = 8.6 Hz, 2H), 3.84 (s, 3H).  $^{13}\text{C-NMR}$  (126 MHz, Chloroform-*d*)  $\delta$  138.53, 137.66, 134.91, 133.74, 132.28, 131.70, 128.99, 128.92, 128.18, 128.15, 124.40, 121.47, 120.26, 118.80, 110.78, 110.42, 31.20. Calcd. for  $\text{C}_{21}\text{H}_{15}\text{Br}_2\text{NS}_2$ .



**(57) 2,3-bis((2-chlorophenyl)thio)-1-methyl-1*H*-indole (4ah)**

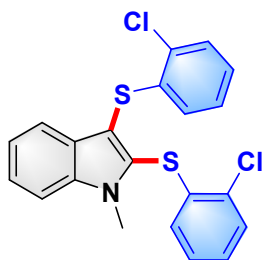

Known compound, (68.5 mg, 66% yield), **<sup>1</sup>H-NMR** (500 MHz, Chloroform-*d*)  $\delta$  7.68 (d,  $J = 8.0$  Hz, 1H), 7.49 (d,  $J = 8.3$  Hz, 1H), 7.43 (t,  $J = 7.1$  Hz, 1H), 7.33 (ddd,  $J = 13.7, 7.9, 1.3$  Hz, 2H), 7.26 (t,  $J = 7.1$  Hz, 1H), 7.08–7.05 (m, 1H), 7.00 (tdd,  $J = 7.8, 4.7, 1.5$  Hz, 2H), 6.95–6.91 (m, 1H), 6.65 (d,  $J = 6.4$  Hz, 1H), 6.59 (d,  $J = 6.4$  Hz, 1H), 3.86 (s, 3H). **<sup>13</sup>C-NMR** (126 MHz, Chloroform-*d*)  $\delta$  138.89, 137.59, 135.15, 133.49, 131.34, 130.56, 129.79, 129.38, 129.16, 127.74, 127.43, 126.99, 126.84, 126.65, 125.63, 124.44, 121.48, 120.39, 110.50, 110.11, 31.21. Calcd. for C<sub>21</sub>H<sub>15</sub>Cl<sub>2</sub>NS<sub>2</sub>.

**(58) 2,3-bis((3-bromophenyl)thio)-1-methyl-1*H*-indole (4ai)**

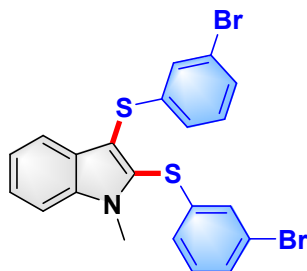

Known compound, (74.2 mg, 59% yield), **<sup>1</sup>H-NMR** (400 MHz, Chloroform-*d*)  $\delta$  7.72 (d,  $J = 8.0$  Hz, 1H), 7.47 (d,  $J = 8.2$  Hz, 1H), 7.43 (t,  $J = 7.6$  Hz, 1H), 7.30–7.26 (m, 2H), 7.25–7.16 (m, 3H), 7.07 (t,  $J = 7.9$  Hz, 1H), 7.04–6.99 (m, 2H), 6.96 (d,  $J = 7.8$  Hz, 1H), 3.87 (s, 3H). **<sup>13</sup>C-NMR** (101 MHz, Chloroform-*d*)  $\delta$  140.88, 138.59, 137.93, 133.56, 130.57, 130.08, 129.85, 129.53, 129.10, 128.92, 128.24, 125.85, 125.04, 124.50, 123.28, 122.89, 121.58, 120.28, 110.55, 110.52, 31.31. Calcd. for C<sub>21</sub>H<sub>15</sub>Br<sub>2</sub>NS<sub>2</sub>.

**(59) 1-methyl-2,3-bis(naphthalen-2-ylthio)-1*H*-indole (4aj)**

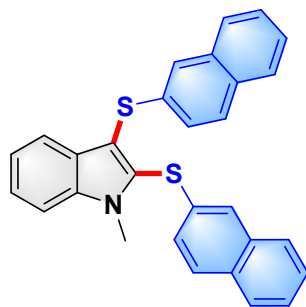

White solid, (84.9 mg, 76% yield), m.p.: 115-116 °C,  $^1\text{H-NMR}$  (500 MHz, Chloroform-*d*)  $\delta$  7.80 (d,  $J$  = 8.0 Hz, 1H), 7.74–7.70 (m, 2H), 7.66–7.61 (m, 2H), 7.58–7.53 (m, 4H), 7.47 (d,  $J$  = 8.3 Hz, 1H), 7.44–7.40 (m, 3H), 7.40–7.35 (m, 2H), 7.34 (d,  $J$  = 6.8 Hz, 1H), 7.27 (d,  $J$  = 6.9 Hz, 1H), 7.23 (d,  $J$  = 8.6 Hz, 1H), 3.89 (s, 3H).  $^{13}\text{C-NMR}$  (126 MHz, Chloroform-*d*)  $\delta$  138.62, 136.06, 134.51, 133.74, 133.12, 131.84, 131.47, 129.41, 128.95, 128.28, 127.72, 127.67, 127.12, 126.97, 126.68, 126.30, 126.07, 125.90, 125.59, 125.47, 125.16, 124.58, 124.13, 121.26, 120.48, 110.35, 31.27. **HRMS (ESI)**: Calcd. for  $\text{C}_{29}\text{H}_{21}\text{NS}_2$   $[\text{M}+\text{H}]^+$ : 448.1188, found: 448.1180.

**(60) 2,3-bis(ethylthio)-1-methyl-1H-indole (4ak)**

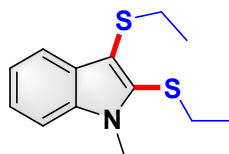

White solid, (49.6 mg, 79% yield), m.p.: 87-90 °C,  $^1\text{H-NMR}$  (500 MHz, Chloroform-*d*)  $\delta$  7.82 (d,  $J$  = 7.9 Hz, 1H), 7.37 (d,  $J$  = 8.2 Hz, 1H), 7.33 (t,  $J$  = 7.0 Hz, 1H), 7.23 (t,  $J$  = 6.8 Hz, 1H), 3.93 (s, 3H), 2.89 (q,  $J$  = 7.4 Hz, 2H), 2.83 (q,  $J$  = 7.4 Hz, 2H), 1.25 (q,  $J$  = 7.4 Hz, 6H).  $^{13}\text{C-NMR}$  (126 MHz, Chloroform-*d*)  $\delta$  137.86, 136.15, 129.91, 123.15, 120.39, 119.76, 112.24, 109.89, 31.28, 30.90, 30.69, 15.19, 14.89. **HRMS (ESI)**: Calcd. for  $\text{C}_{13}\text{H}_{17}\text{NS}_2$   $[\text{M}+\text{H}]^+$ : 252.0875, found: 252.0873.

**(61) 1-methyl-2,3-bis(phenylselanyl)-1H-indole (4al)**

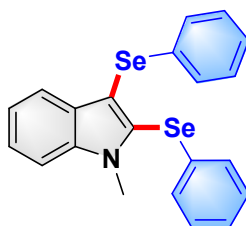

White solid, (82.0 mg, 83% yield), m.p.: 121-123 °C,  $^1\text{H-NMR}$  (500 MHz, Chloroform-*d*)  $\delta$  7.75 (d,  $J$  = 8.0 Hz, 1H), 7.42 (d,  $J$  = 8.3 Hz, 1H), 7.36 (t,  $J$  = 7.1 Hz, 1H), 7.30 (dd,  $J$  = 4.8, 3.0 Hz, 2H), 7.25–7.21 (m,

3H), 7.18 (dt,  $J = 5.4, 2.4$  Hz, 3H), 7.14 (dt,  $J = 4.6, 3.2$  Hz, 3H), 3.90 (s, 3H).  $^{13}\text{C-NMR}$  (126 MHz, Chloroform- $d$ )  $\delta$  138.94, 133.79, 133.68, 131.62, 130.52, 130.15, 129.45, 129.42, 128.96, 126.80, 125.80, 123.64, 121.35, 120.97, 110.23, 109.04, 32.83. **HRMS (ESI):** Calcd. for  $\text{C}_{21}\text{H}_{17}\text{NSe}_2$   $[\text{M}+\text{H}]^+$ : 443.9764, found: 443.9758.

**(62) 1-methyl-3,5-bis(phenylthio)-2-(trifluoromethyl)-1H-indole (6)**

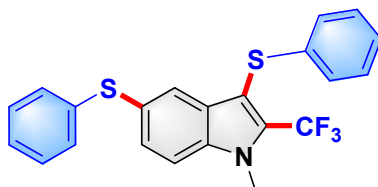

White solid, (71.6 mg, 69% yield), m.p.: 73-75 °C,  $^1\text{H-NMR}$  (600 MHz, Chloroform- $d$ )  $\delta$  7.90 (s, 1H), 7.50 (d,  $J = 8.9$  Hz, 1H), 7.43 (d,  $J = 8.6$  Hz, 1H), 7.26–7.16 (m, 7H), 7.16–7.11 (m, 3H), 3.96 (s, 3H).  $^{13}\text{C-NMR}$  (151 MHz, Chloroform- $d$ )  $\delta$  137.97, 137.54, 137.41, 130.72, 130.04 (d,  $J = 36.2$  Hz), 129.46, 129.00, 128.92, 128.87, 127.03, 126.95, 126.47, 126.11, 125.63, 122.12, 111.35, 106.47, 32.00 (d,  $J = 3.0$  Hz, 1H).  $^{19}\text{F-NMR}$  (565 MHz, Chloroform- $d$ )  $\delta$  -56.51. **HRMS (ESI):** Calcd. for  $\text{C}_{22}\text{H}_{16}\text{F}_3\text{NS}_2$   $[\text{M}+\text{H}]^+$ : 416.0749, found: 416.0742.

**(63) 1-methyl-3,5-bis(phenylthio)-2-(1H-pyrazol-1-yl)-1H-indole (7)**

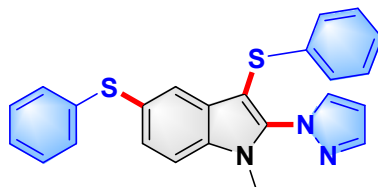

White solid, (43.4 mg, 42% yield), m.p.: 106-108 °C,  $^1\text{H-NMR}$  (600 MHz, Chloroform- $d$ )  $\delta$  7.93 (s, 1H), 7.89 (s, 1H), 7.76 (d,  $J = 2.4$  Hz, 1H), 7.50 (d,  $J = 6.9$  Hz, 1H), 7.45 (d,  $J = 8.5$  Hz, 1H), 7.26–7.23 (m, 2H), 7.22 (s, 4H), 7.16 (t,  $J = 7.1$  Hz, 1H), 7.11 (t,  $J = 7.6$  Hz, 3H), 6.49 (t,  $J = 2.1$  Hz, 1H), 3.81 (s, 3H).  $^{13}\text{C-NMR}$  (151 MHz, Chloroform- $d$ )  $\delta$  142.52, 139.72, 138.71, 138.02, 135.07, 133.47, 129.48, 129.02, 129.01, 128.95, 128.37, 126.27, 126.00, 125.87, 125.81, 125.39, 111.30, 107.05, 95.91, 30.98. **HRMS (ESI):** Calcd. for  $\text{C}_{24}\text{H}_{19}\text{N}_3\text{S}_2$   $[\text{M}+\text{H}]^+$ : 414.1093, found: 414.1089.

**(64) 1-methyl-2,3,5-tris(phenylthio)-1H-indole (8)**

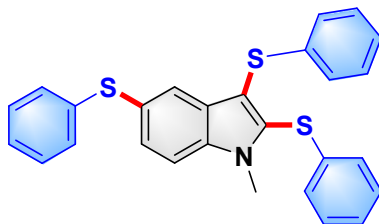

White solid, (97.8 mg, 86% yield), m.p.: 129-131 °C,  $^1\text{H-NMR}$  (600 MHz, Chloroform-*d*)  $\delta$  7.89 (s, 1H), 7.46–7.44 (m, 1H), 7.38 (d,  $J = 8.6$  Hz, 1H), 7.25–7.21 (m, 6H), 7.16 (ddt,  $J = 13.3, 6.5, 3.4$  Hz, 6H), 7.12–7.08 (m, 3H), 3.82 (s, 3H).  $^{13}\text{C-NMR}$  (151 MHz, Chloroform-*d*)  $\delta$  138.52, 138.15, 138.06, 135.53, 135.48, 129.99, 129.46, 129.30, 128.92, 128.74, 128.63, 127.72, 127.01, 126.45, 125.87, 125.86, 125.77, 125.32, 111.59, 111.28, 31.31. **HRMS (ESI):** Calcd. for  $\text{C}_{27}\text{H}_{21}\text{NS}_3$   $[\text{M}+\text{H}]^+$ : 456.0909, found: 456.0903.

**(65) 2-bromo-1-methyl-3,5-bis(phenylthio)-1H-indole (9)**

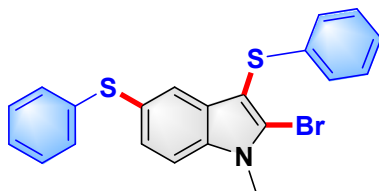

White solid, (81.6 mg, 77% yield), m.p.: 118-119 °C,  $^1\text{H-NMR}$  (600 MHz, Chloroform-*d*)  $\delta$  7.86 (s, 1H), 7.44 (d,  $J = 8.7$  Hz, 1H), 7.28 (d,  $J = 8.7$  Hz, 1H), 7.22 (t,  $J = 7.4$  Hz, 2H), 7.19–7.15 (m, 3H), 7.14–7.07 (m, 5H), 3.80 (s, 3H).  $^{13}\text{C-NMR}$  (151 MHz, Chloroform-*d*)  $\delta$  138.08, 137.11, 136.10, 135.29, 130.90, 129.33, 128.83, 127.71, 127.01, 126.67, 126.51, 125.30, 122.74, 114.73, 111.75, 110.60, 31.37. **HRMS (ESI):** Calcd. for  $\text{C}_{21}\text{H}_{16}\text{BrNS}_2$   $[\text{M}+\text{H}]^+$ : 425.9980.1080, found: 425.9975.

## SPECTROSCOPIC DATA

### 11. NMR spectra of the obtained compounds.

#### (1) $^1\text{H-NMR}$ (600 MHz, $\text{CDCl}_3$ ) spectrum of 1f

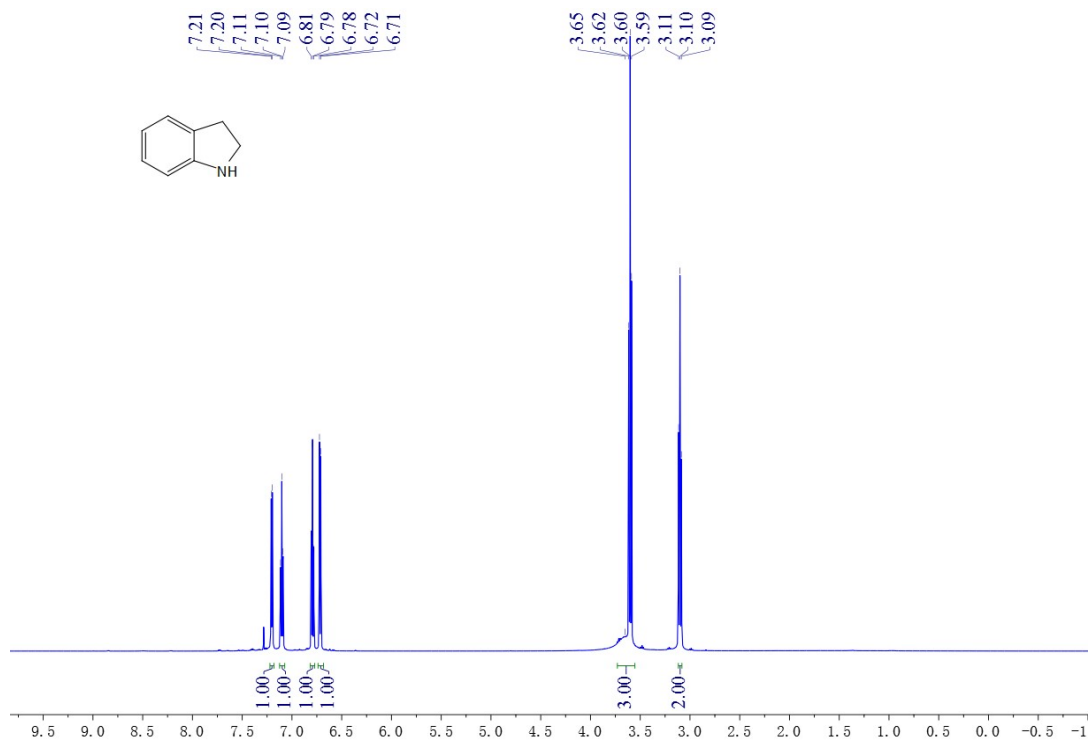

#### (2) $^1\text{H-NMR}$ (600 MHz, $\text{CDCl}_3$ ) spectrum of 2f

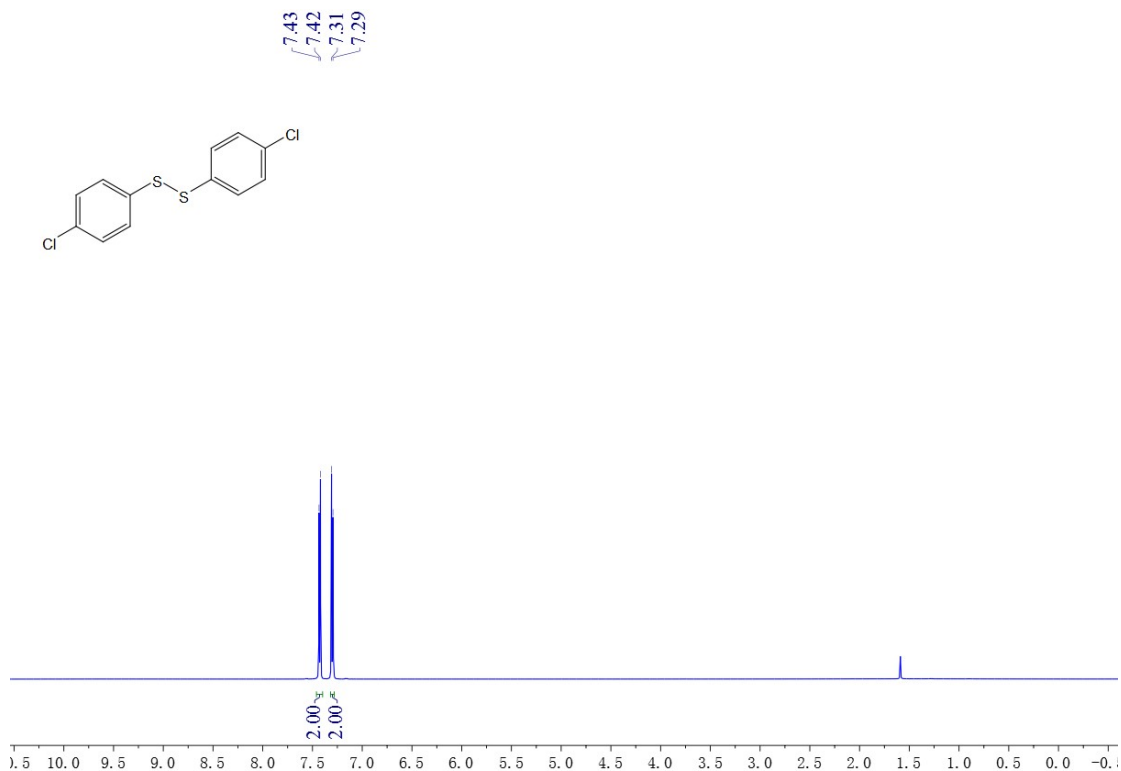

(3)  $^1\text{H-NMR}$  (600 MHz,  $\text{CDCl}_3$ ) spectrum of 2q

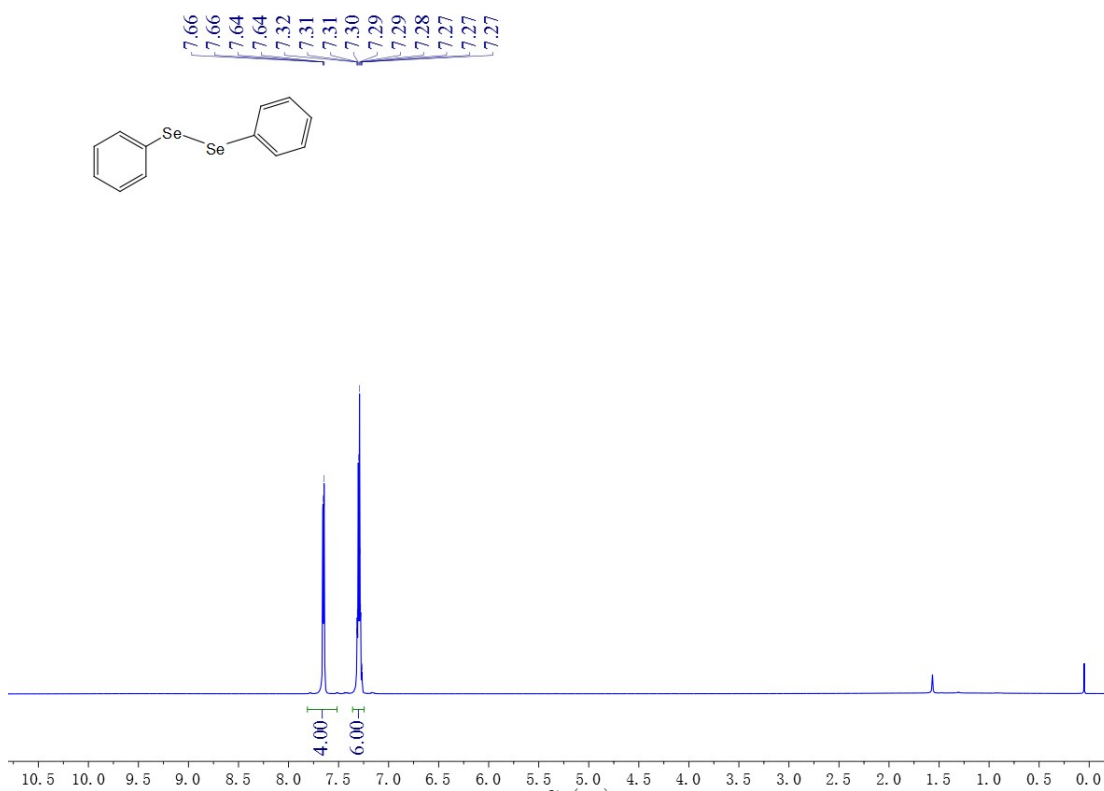

(4)  $^1\text{H-NMR}$  (500 MHz,  $\text{CDCl}_3$ ) spectrum of 1a-1

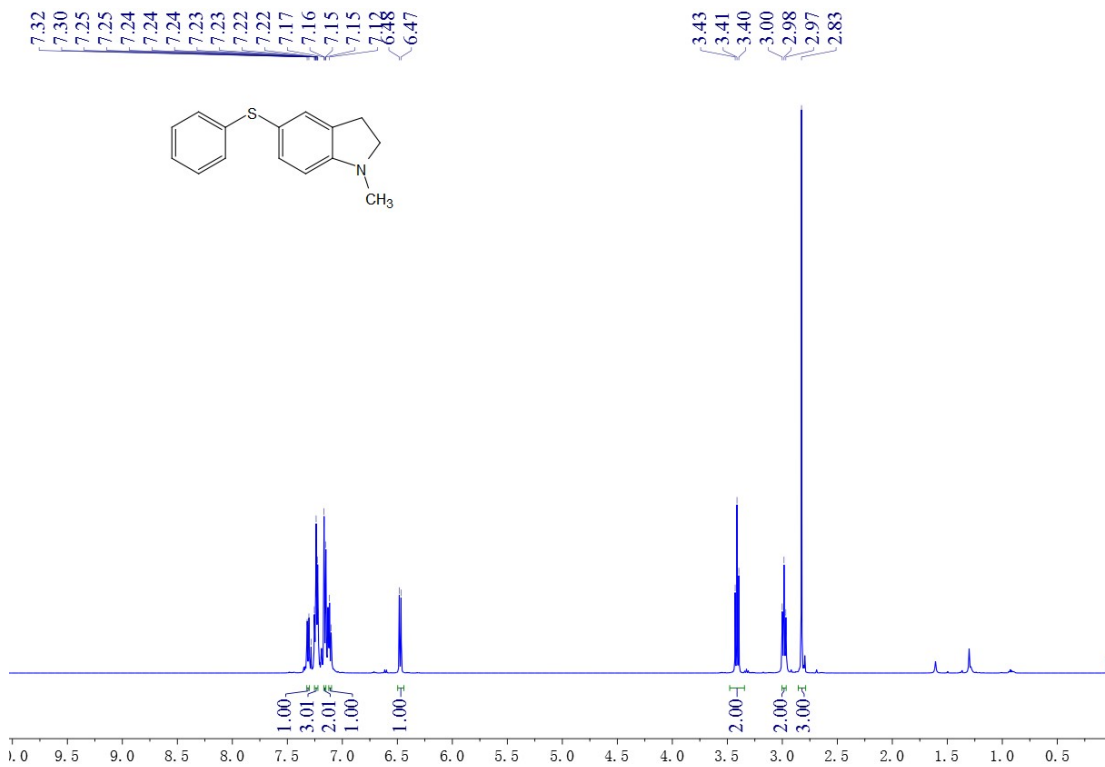

(5)  $^{13}\text{C}$ -NMR (126 MHz,  $\text{CDCl}_3$ ) spectrum of 1a-1

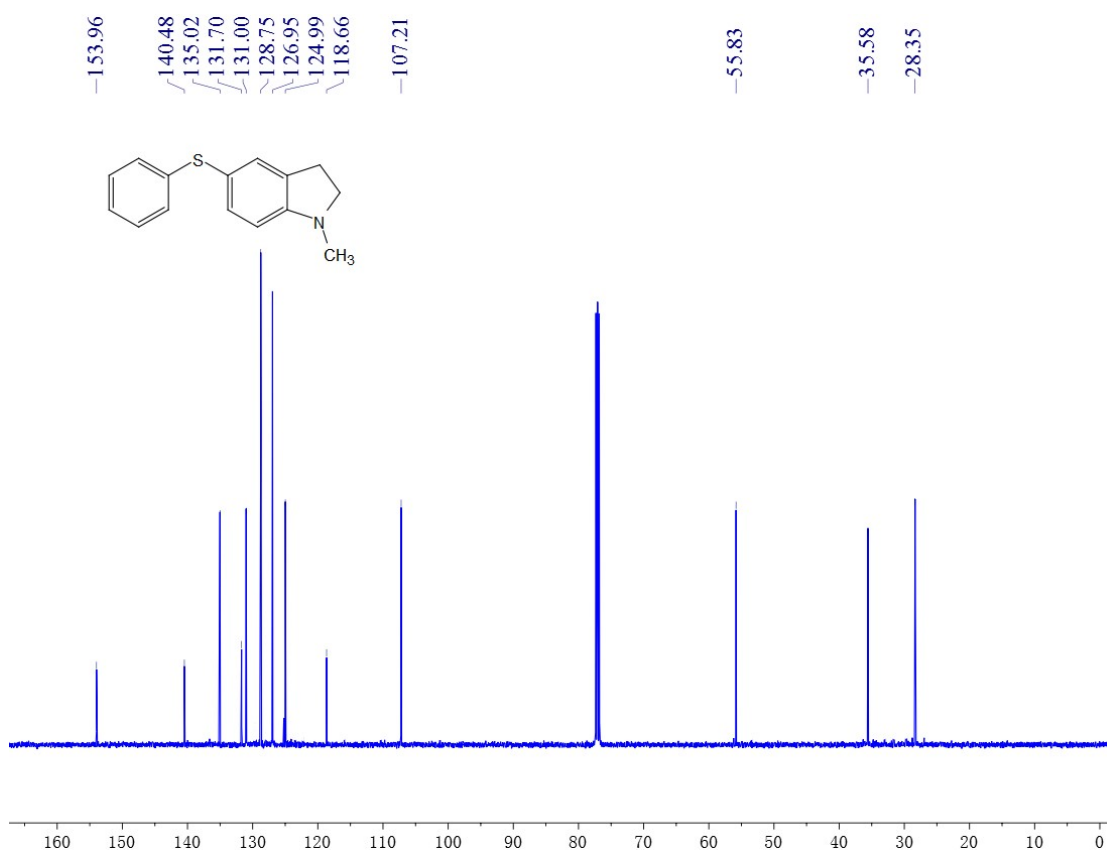

(6)  $^1\text{H}$ -NMR (600 MHz,  $\text{CDCl}_3$ ) spectrum of 1a-2

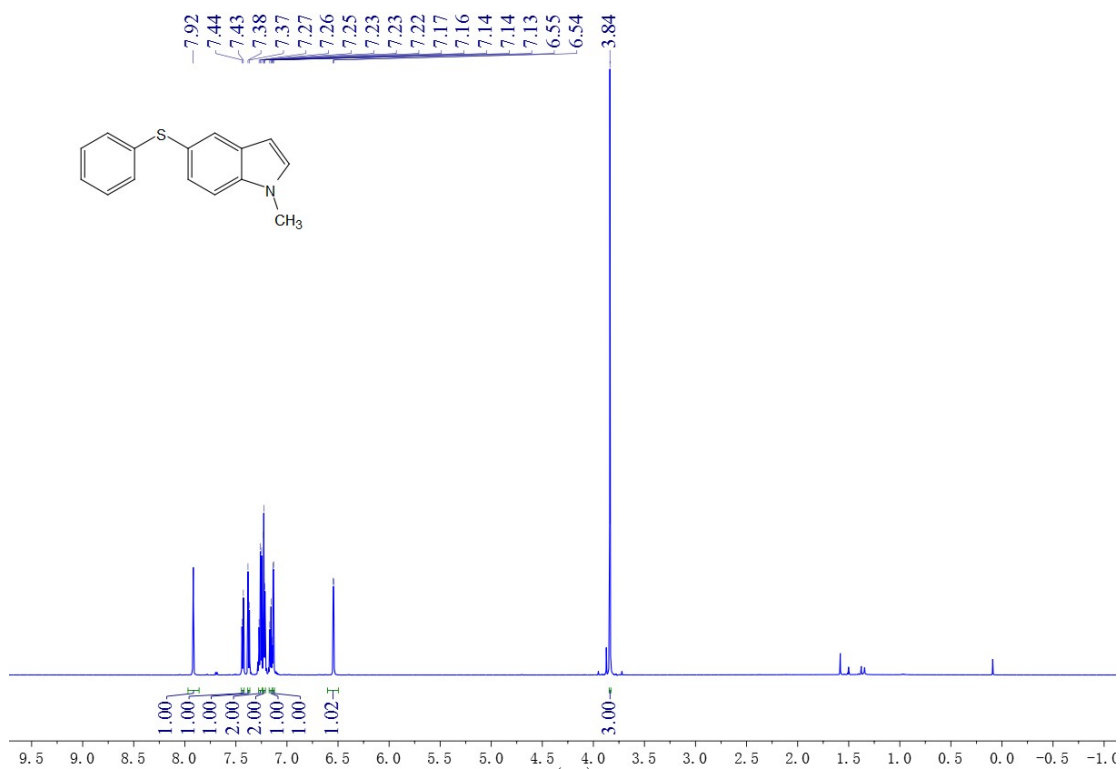

(7)  $^{13}\text{C}$ -NMR (151 MHz,  $\text{CDCl}_3$ ) spectrum of 1a-2

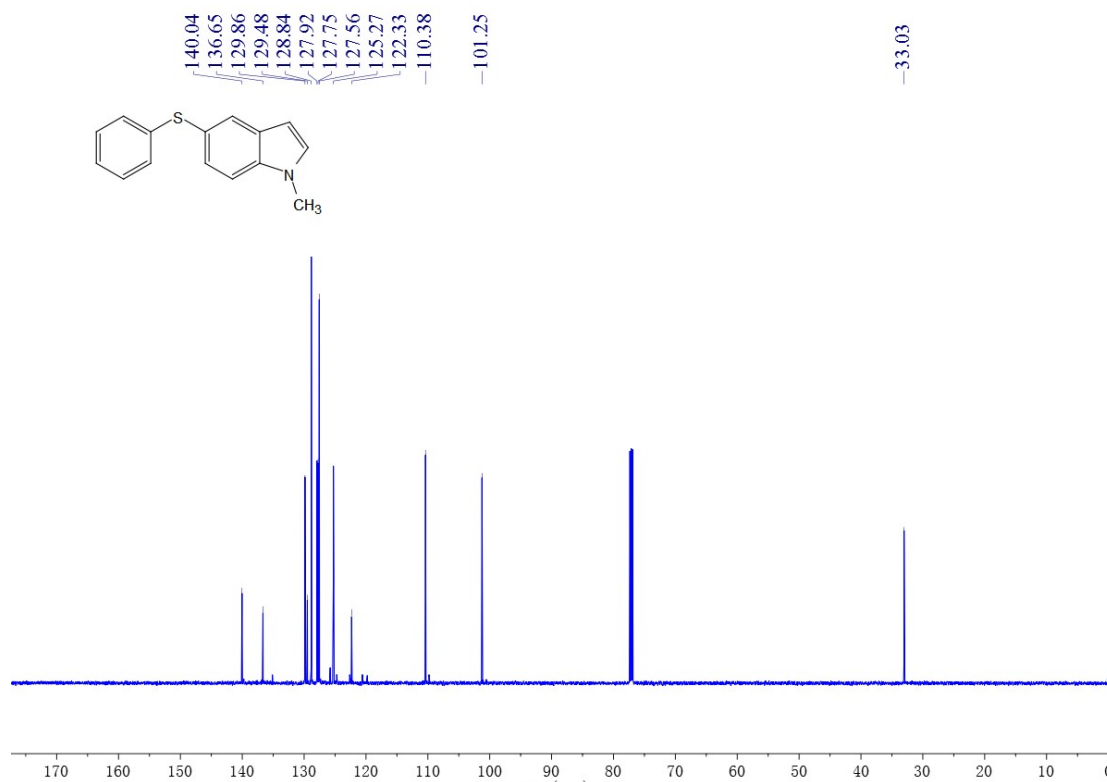

(8)  $^1\text{H}$ -NMR (600 MHz,  $\text{CDCl}_3$ ) spectrum of 1a-4

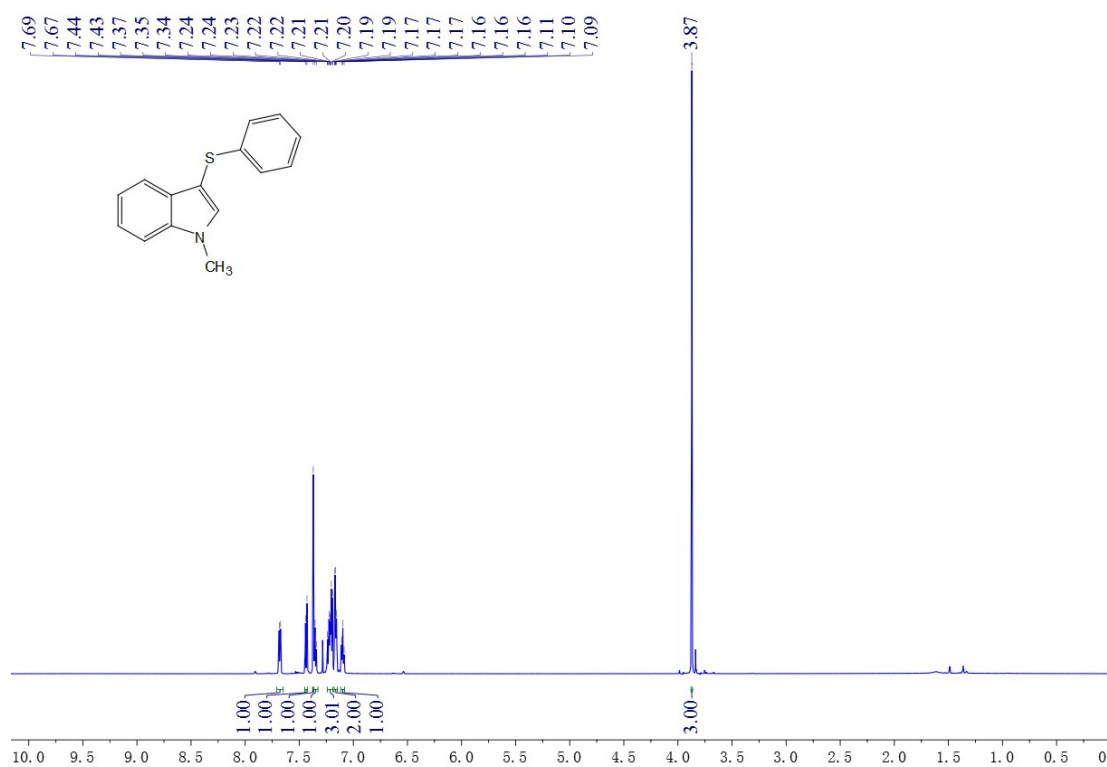





(11)  $^{13}\text{C}$ -NMR (151 MHz,  $\text{CDCl}_3$ ) spectrum of 4

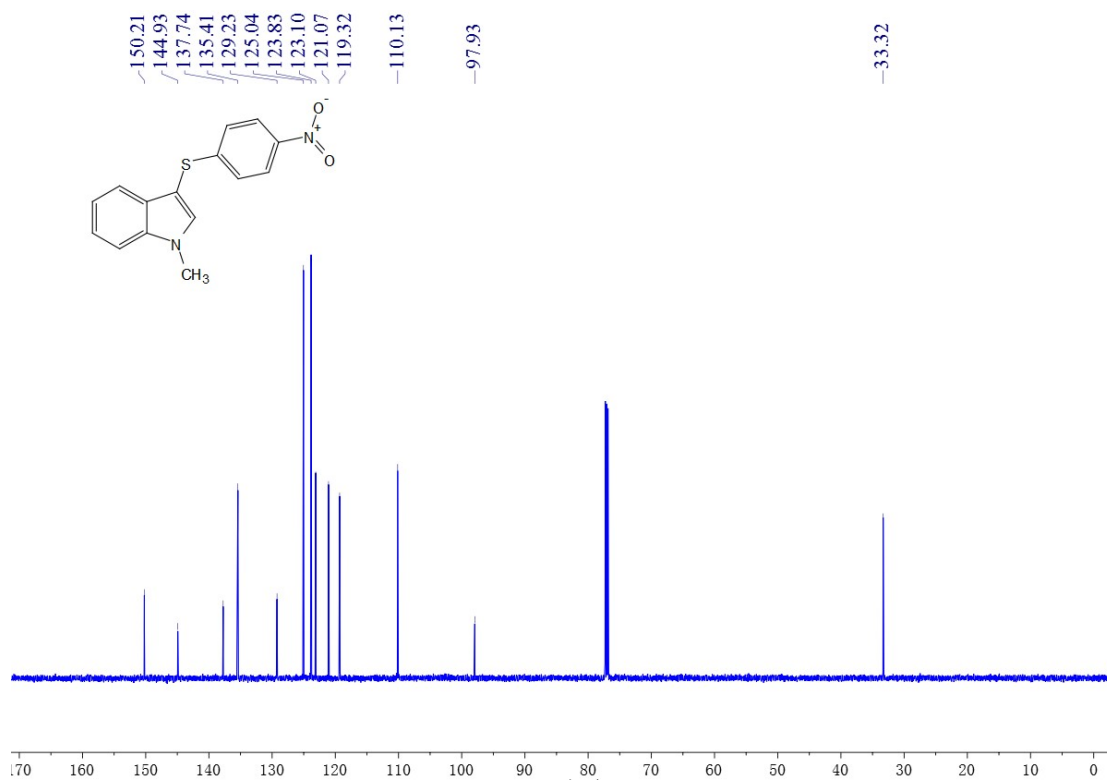

(12)  $^1\text{H}$ -NMR (600 MHz,  $\text{CDCl}_3$ ) spectrum of 5

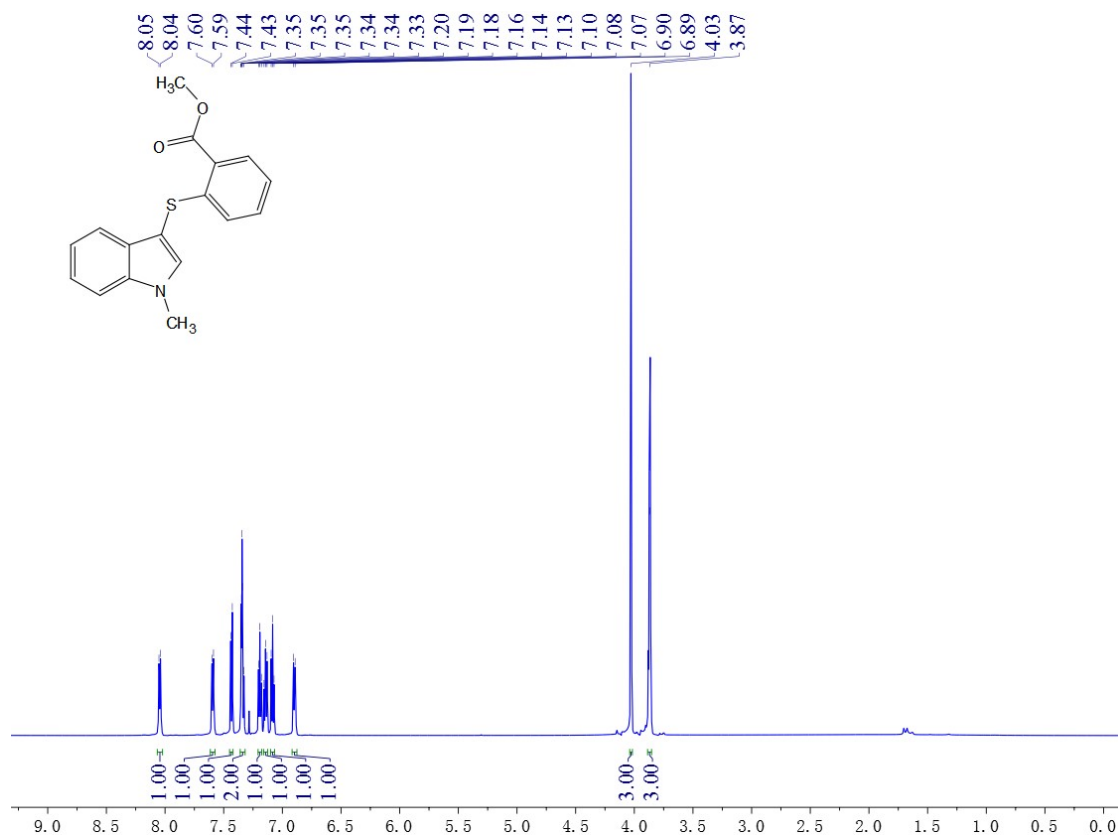

(13) <sup>13</sup>C-NMR (151 MHz, CDCl<sub>3</sub>) spectrum of 5

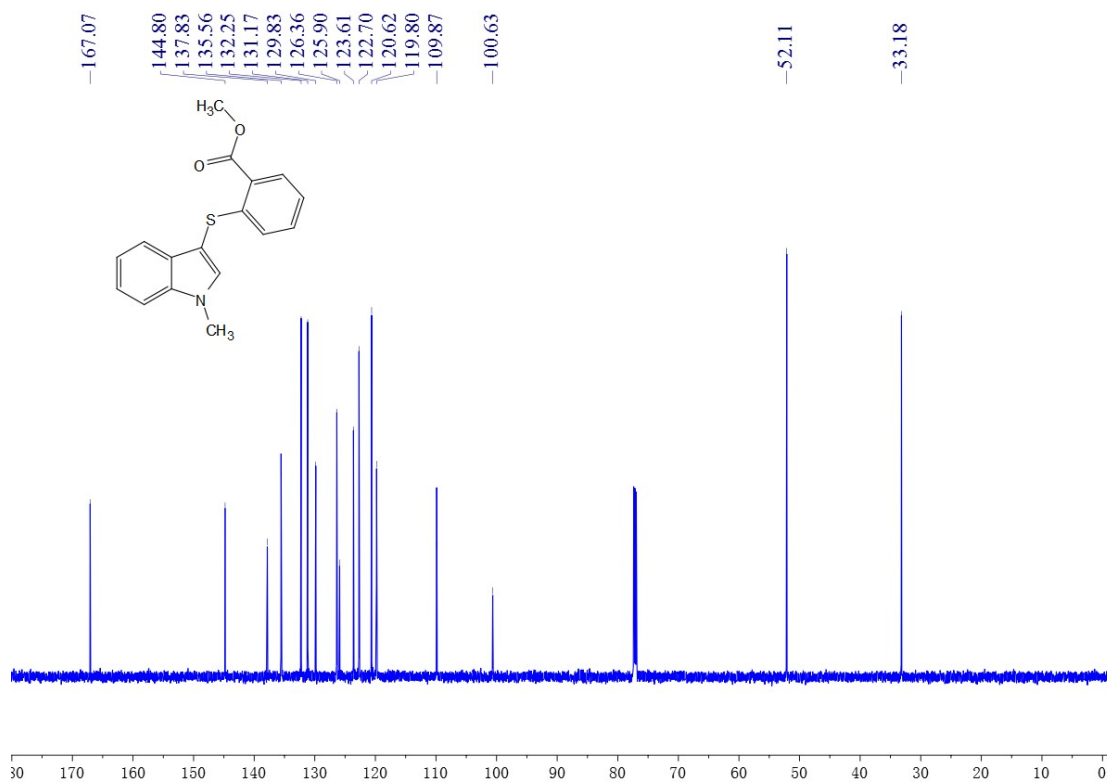

(14) <sup>1</sup>H-NMR (500 MHz, CDCl<sub>3</sub>) spectrum of 3aa

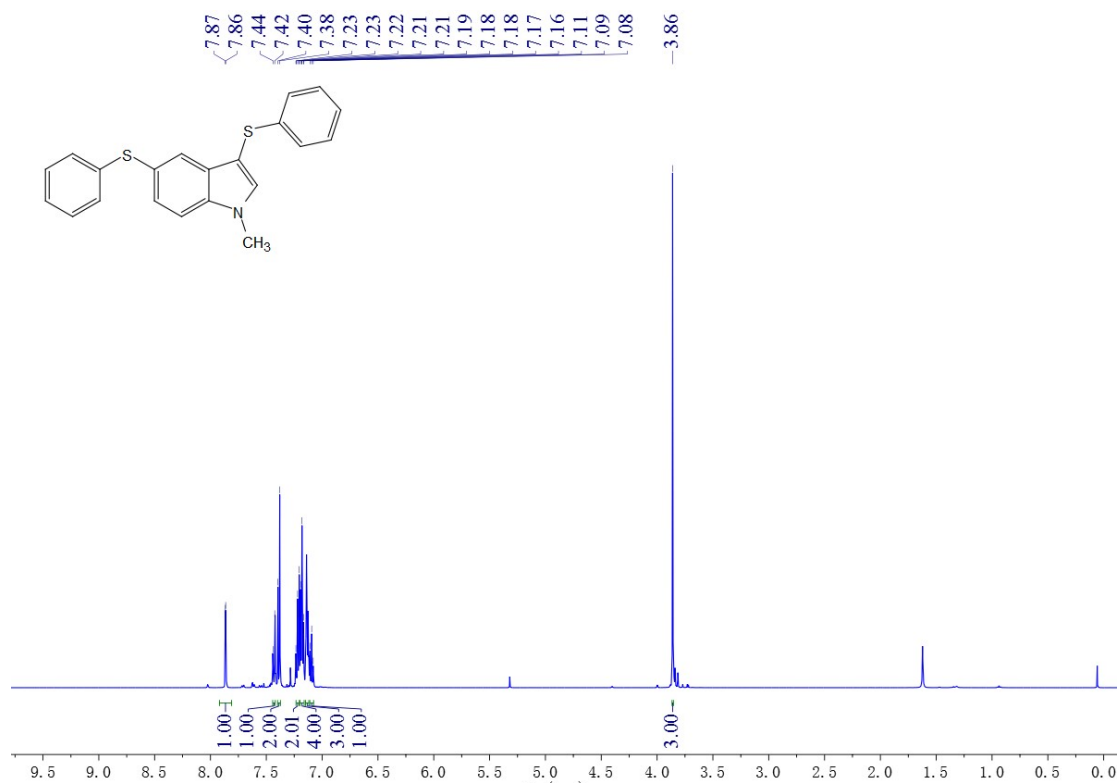

(15)  $^{13}\text{C}$ -NMR (126 MHz,  $\text{CDCl}_3$ ) spectrum of 3aa

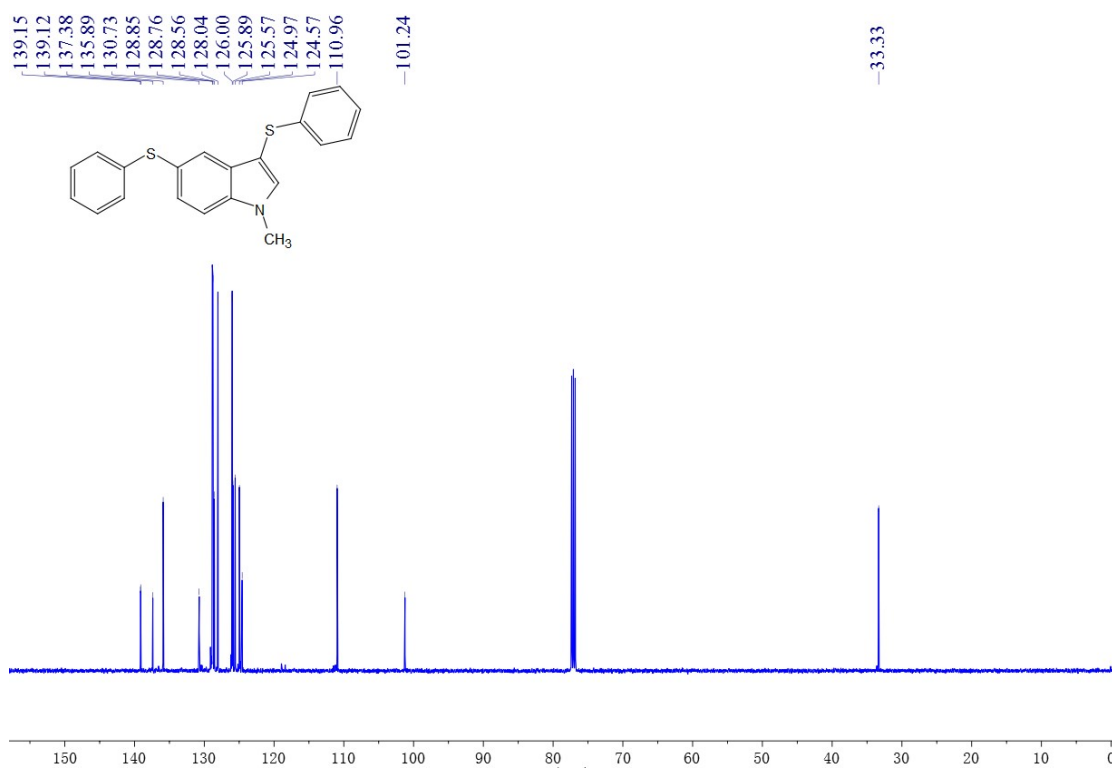

(16)  $^1\text{H}$ -NMR (500 MHz,  $\text{CDCl}_3$ ) spectrum of 3ba

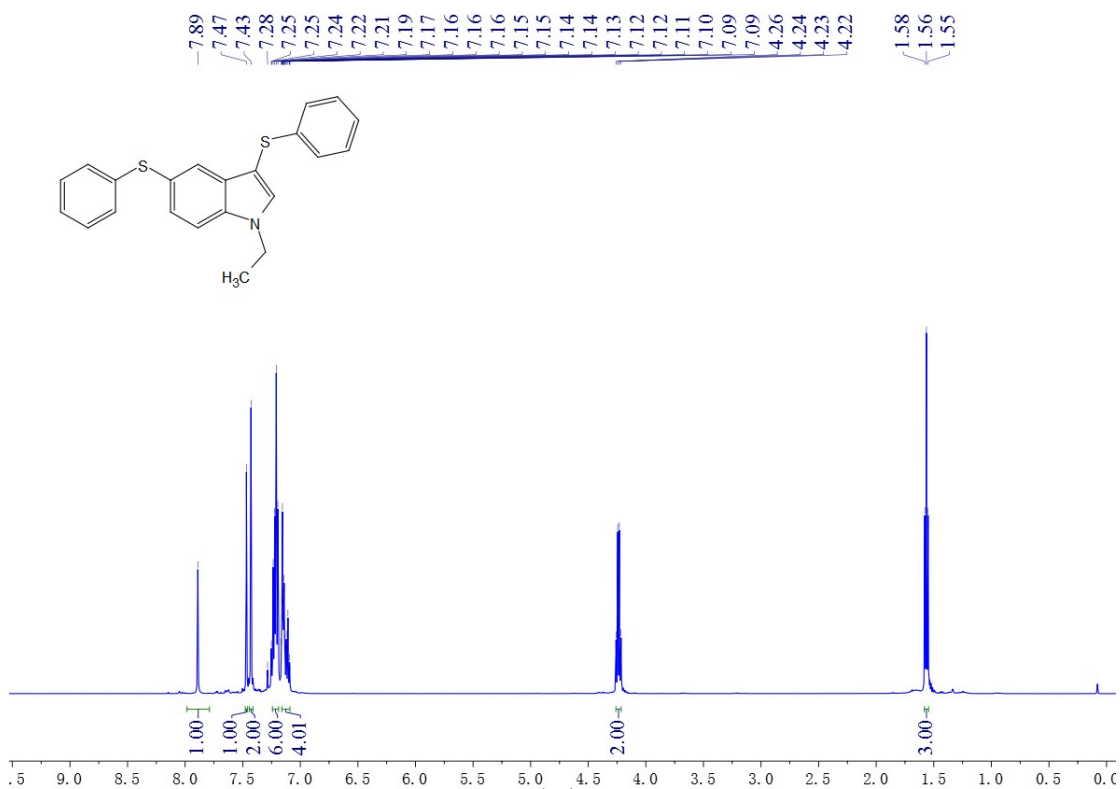

(17)  $^{13}\text{C}$ -NMR (126 MHz,  $\text{CDCl}_3$ ) spectrum of 3ba

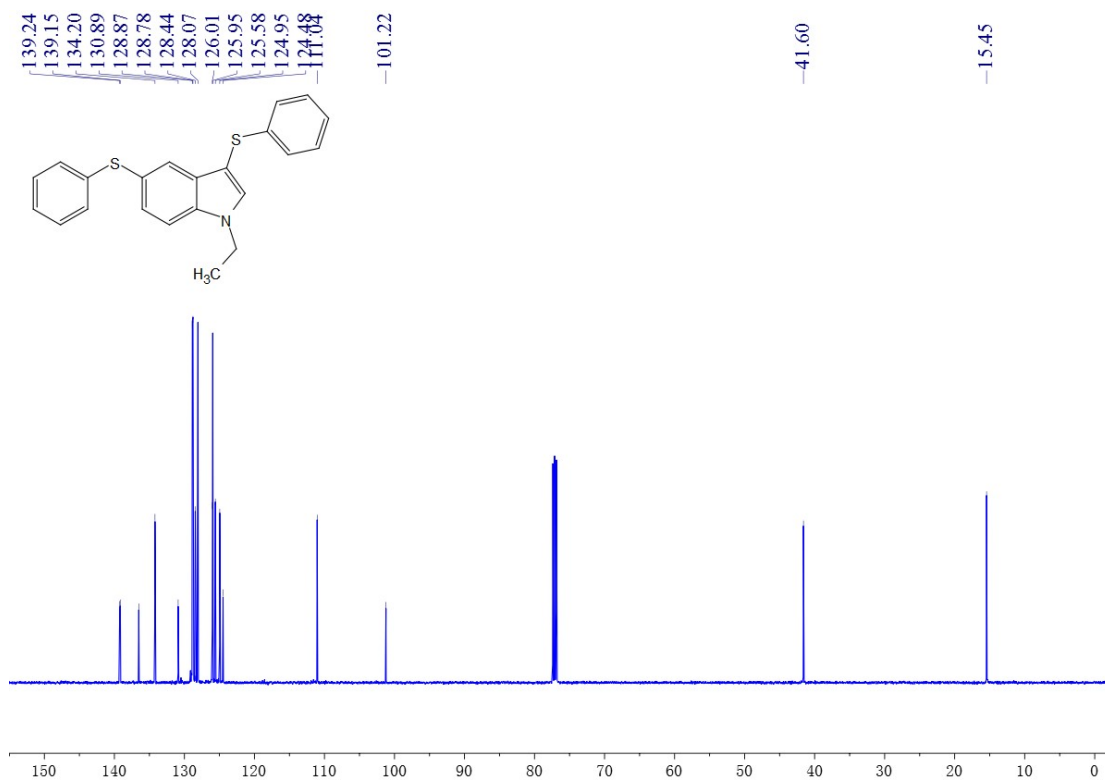

(18)  $^1\text{H}$ -NMR (600 MHz,  $\text{CDCl}_3$ ) spectrum of 3ca

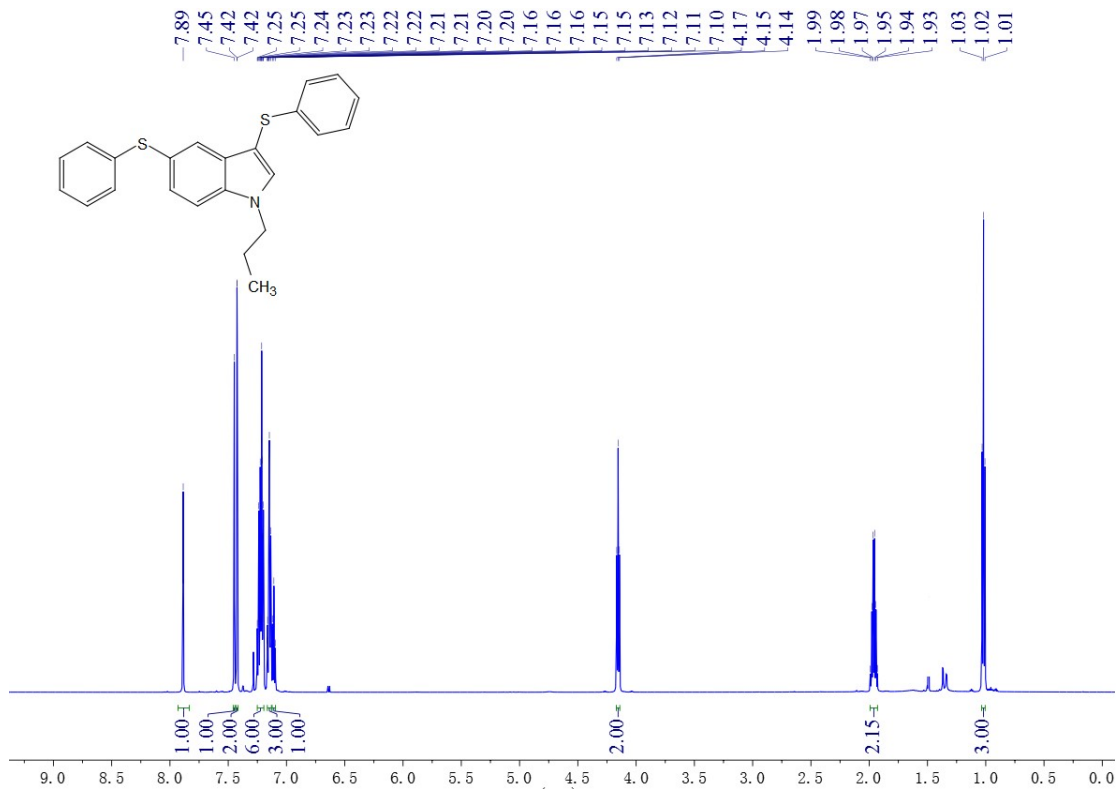

(19)  $^{13}\text{C}$ -NMR (151 MHz,  $\text{CDCl}_3$ ) spectrum of 3ca

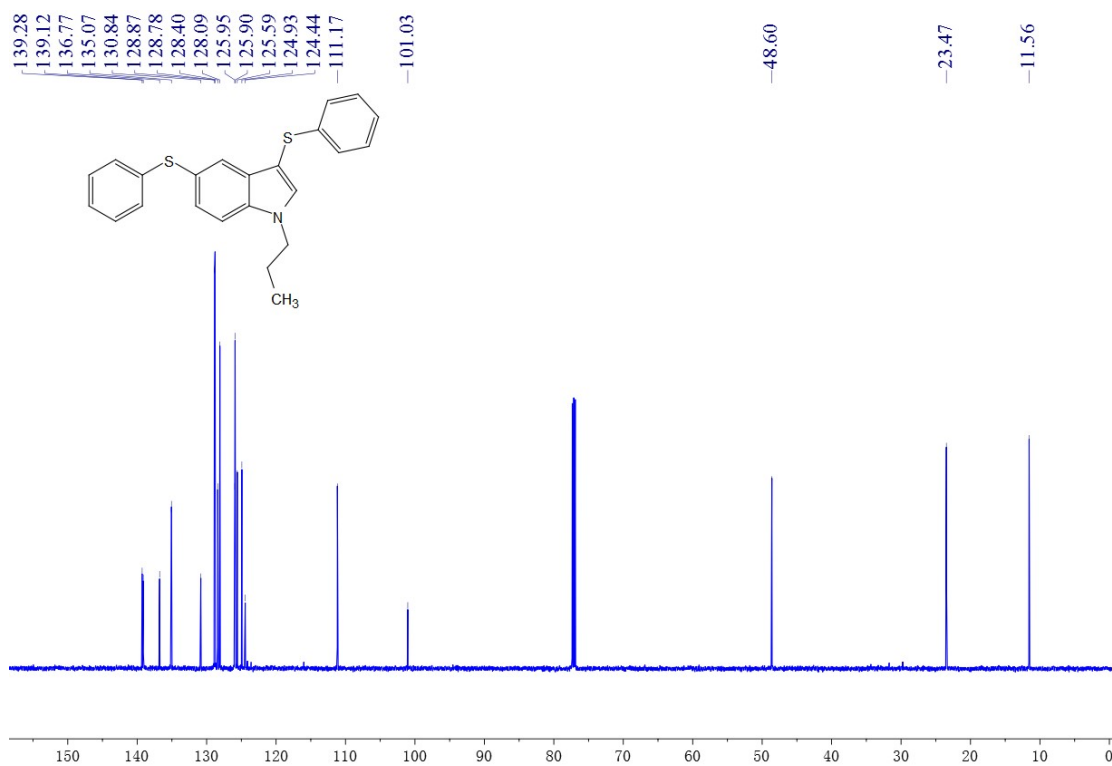

(20)  $^1\text{H}$ -NMR (600 MHz,  $\text{CDCl}_3$ ) spectrum of 3da

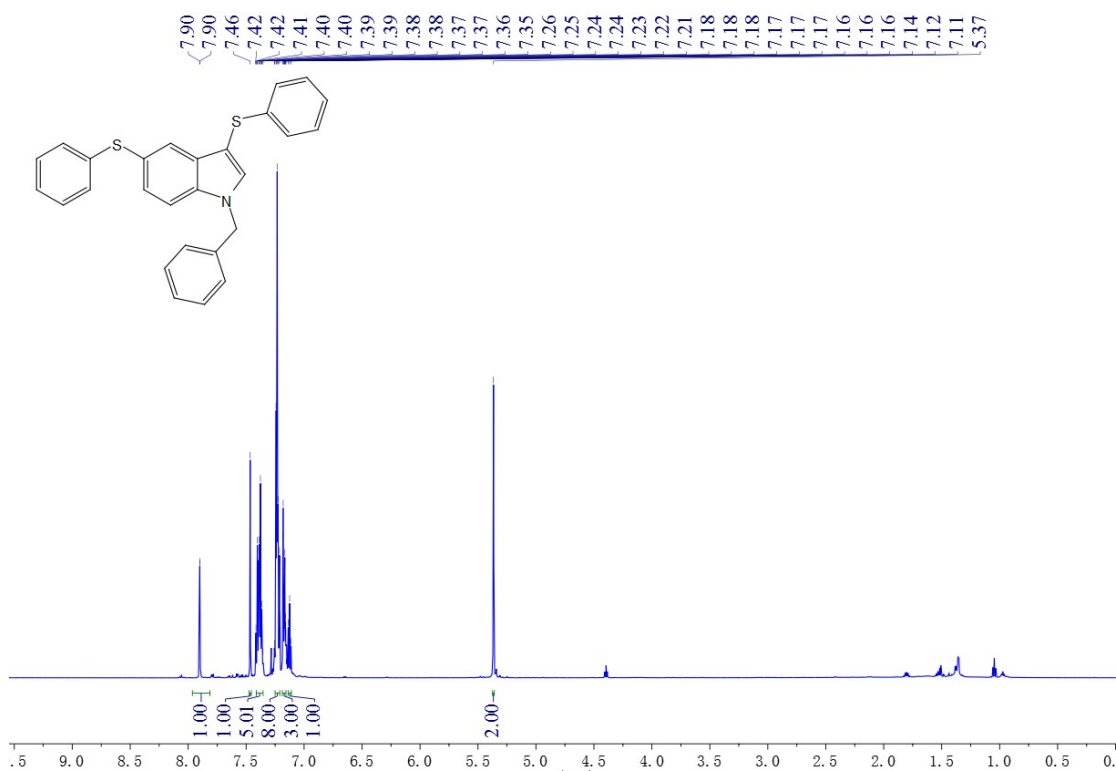

(21)  $^{13}\text{C}$ -NMR (151 MHz,  $\text{CDCl}_3$ ) spectrum of 3da

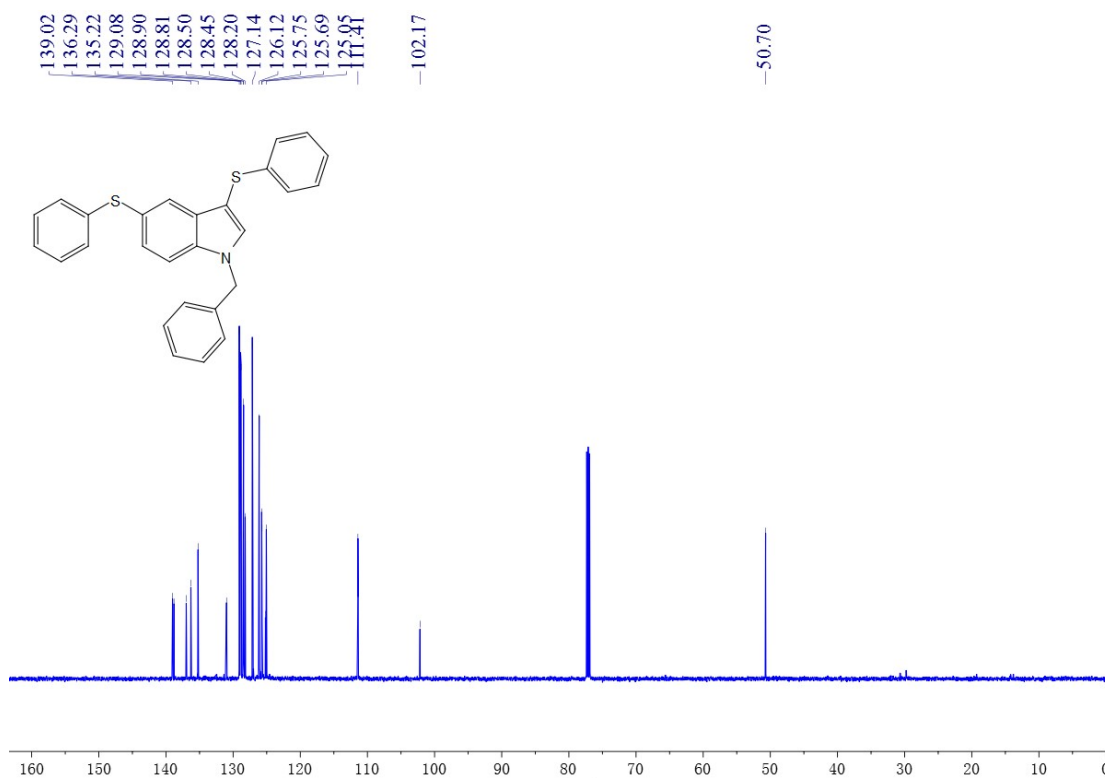

(22)  $^1\text{H}$ -NMR (600 MHz,  $\text{CDCl}_3$ ) spectrum of 3fa

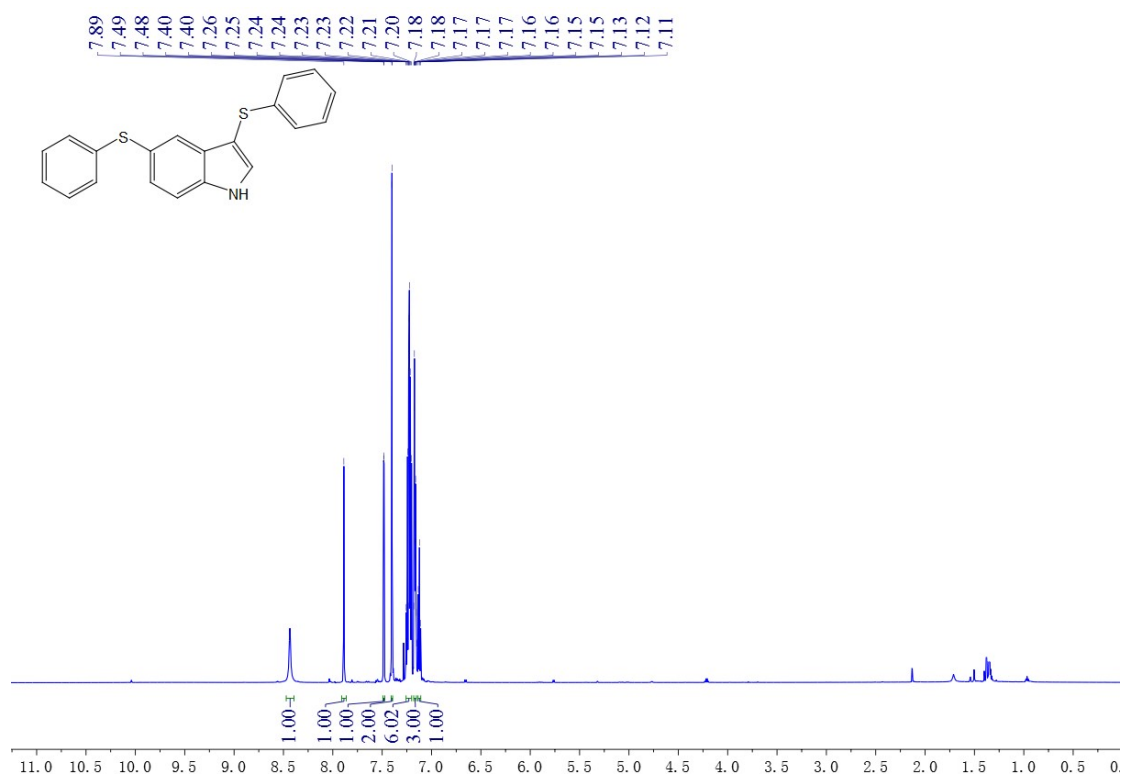

(23)  $^{13}\text{C}$ -NMR (151 MHz,  $\text{CDCl}_3$ ) spectrum of 3fa

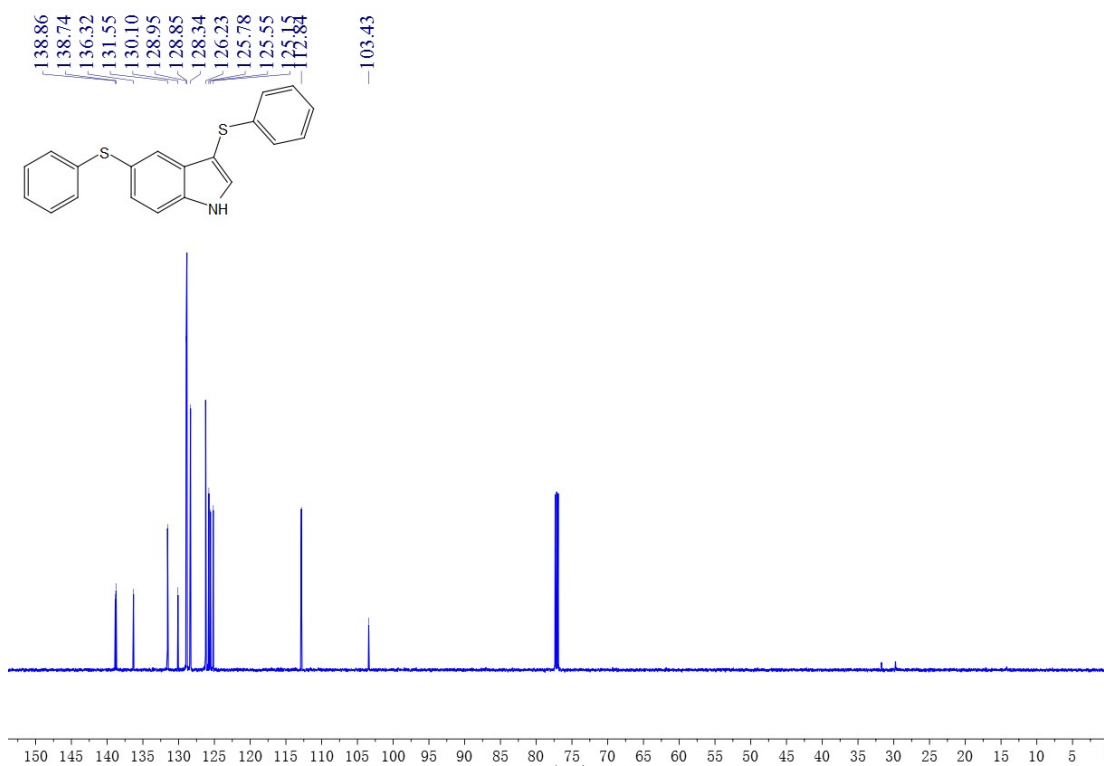

(24)  $^1\text{H}$ -NMR (600 MHz,  $\text{CDCl}_3$ ) spectrum of 3ga

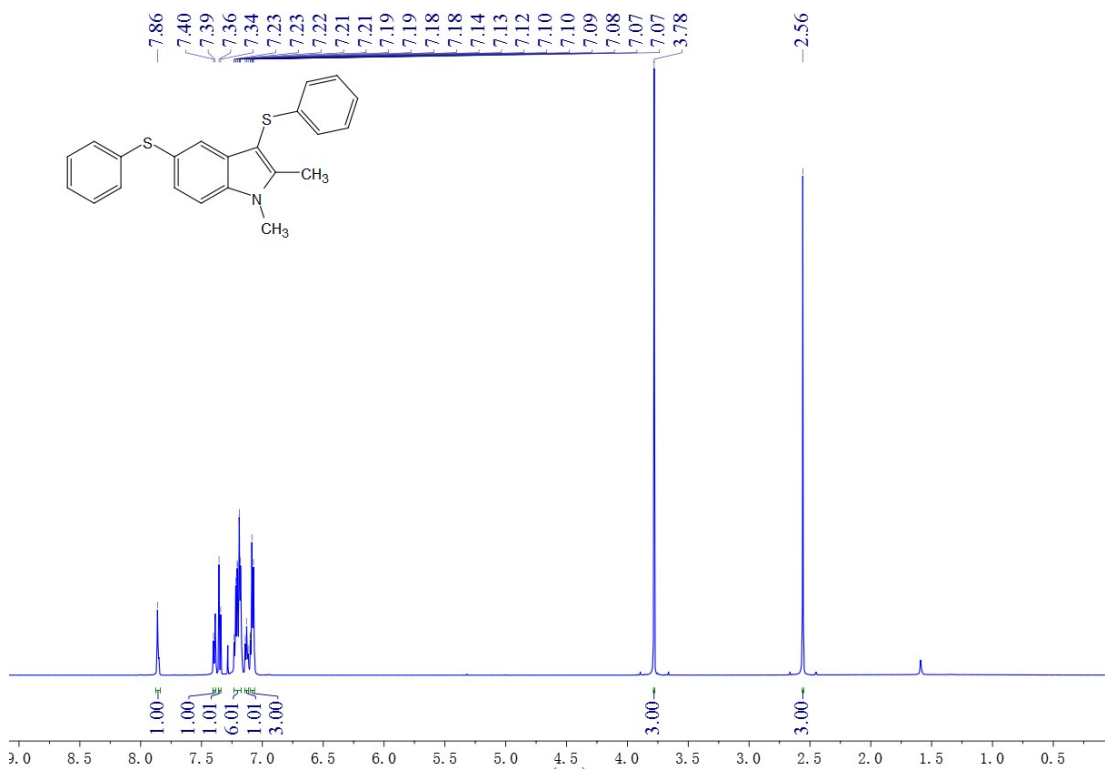



(25)  $^{13}\text{C}$ -NMR (151 MHz,  $\text{CDCl}_3$ ) spectrum of 3ga

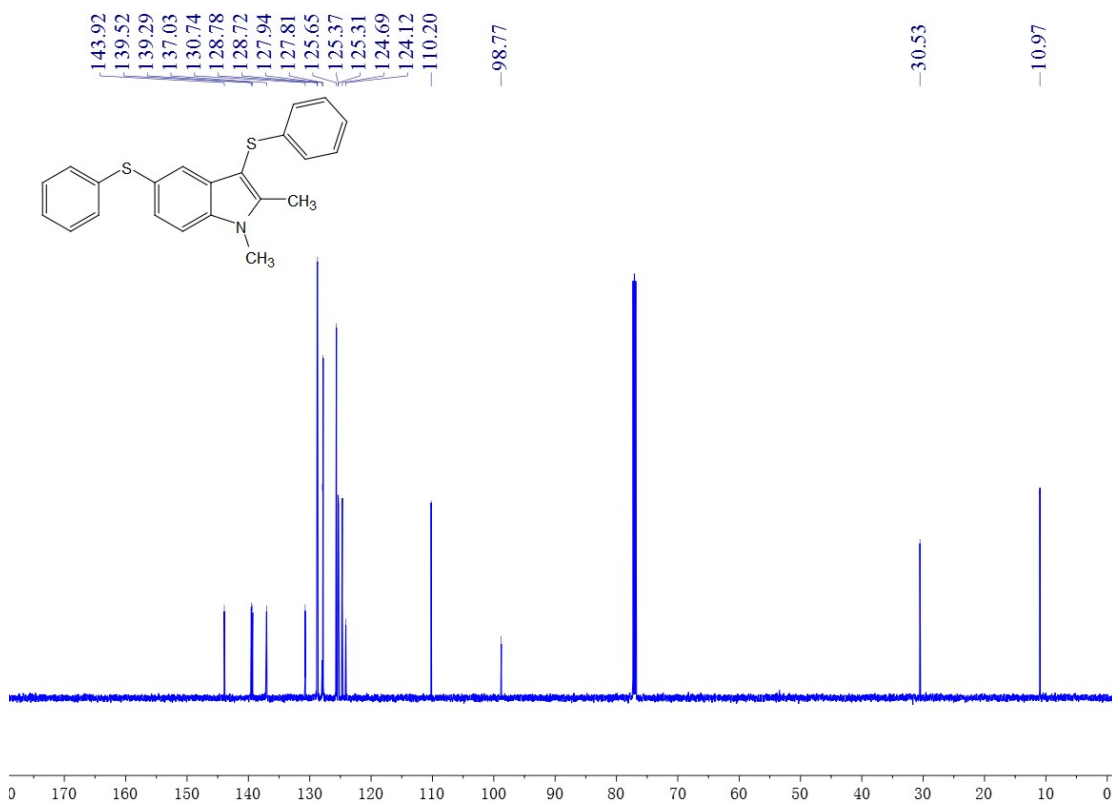

(26)  $^1\text{H}$ -NMR (600 MHz,  $\text{CDCl}_3$ ) spectrum of 3ha

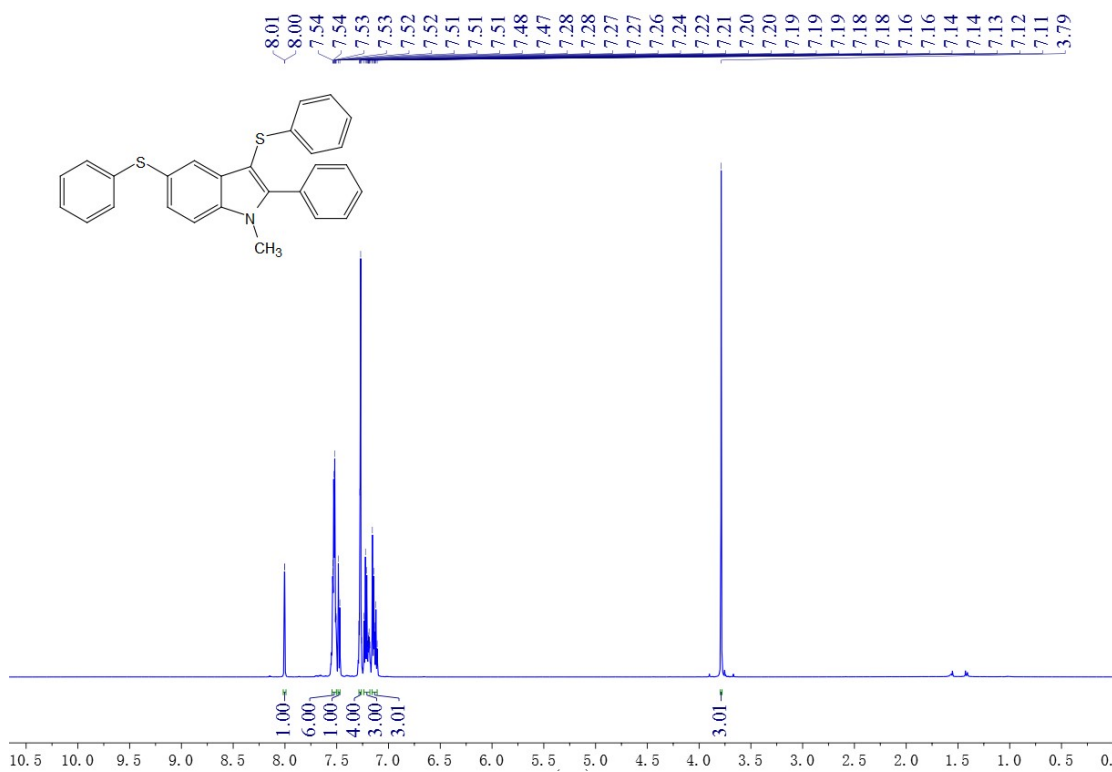

(27)  $^{13}\text{C}$ -NMR (151 MHz,  $\text{CDCl}_3$ ) spectrum of 3ha

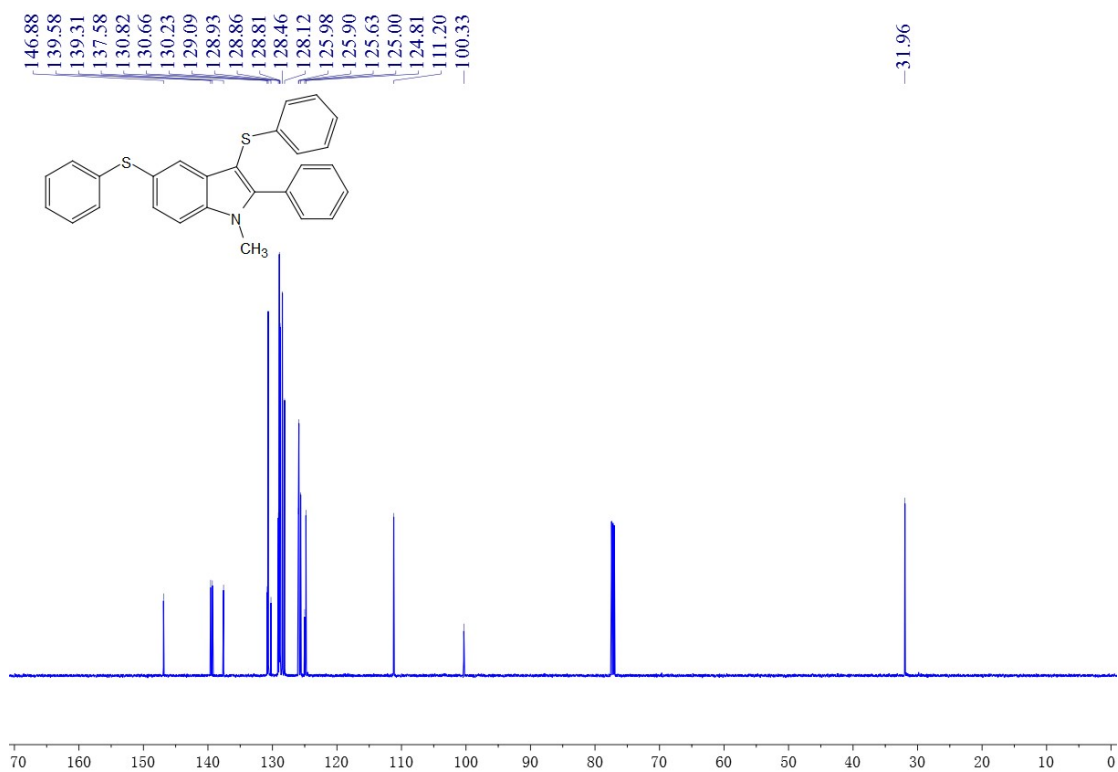

(28)  $^1\text{H}$ -NMR (600 MHz,  $\text{CDCl}_3$ ) spectrum of 3ia

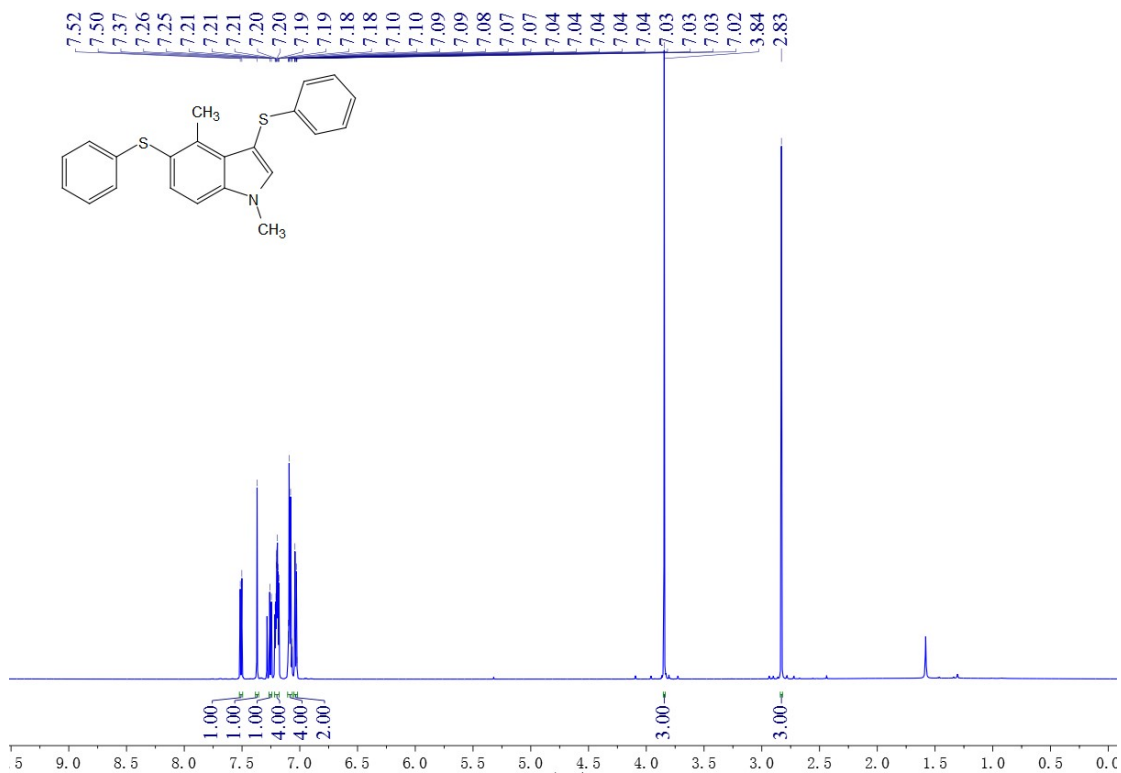

(29)  $^{13}\text{C}$ -NMR (151 MHz,  $\text{CDCl}_3$ ) spectrum of 3ia

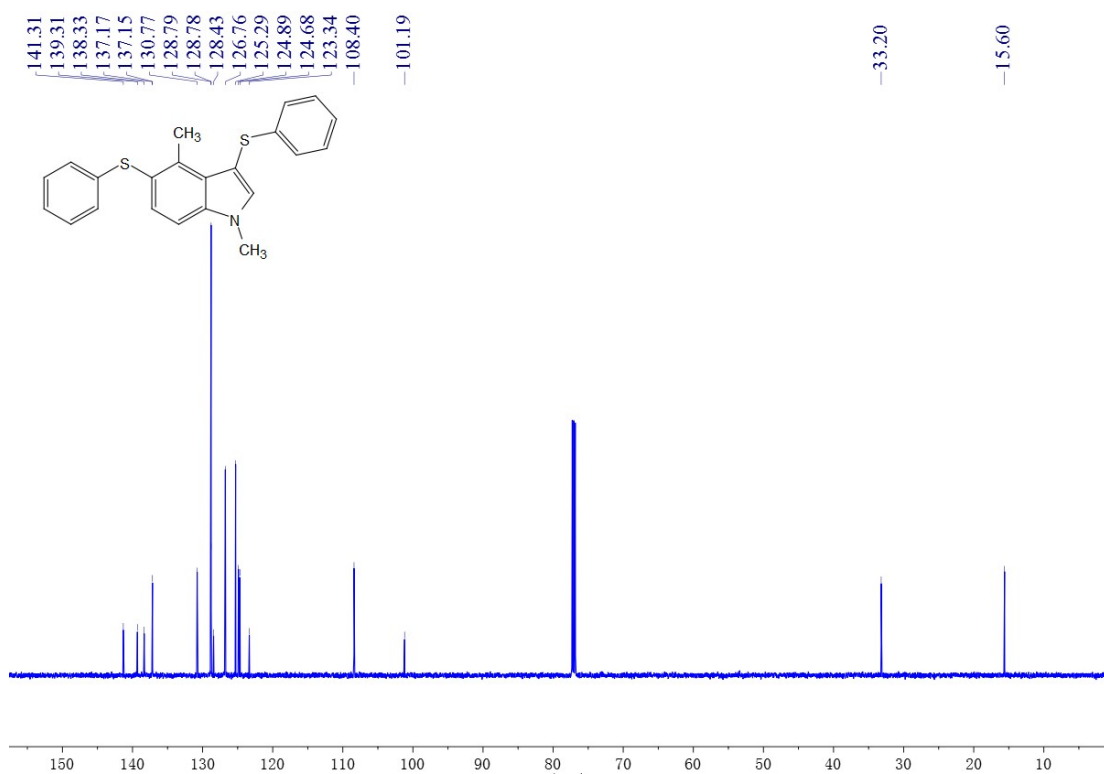

(30)  $^1\text{H}$ -NMR (600 MHz,  $\text{CDCl}_3$ ) spectrum of 3ja

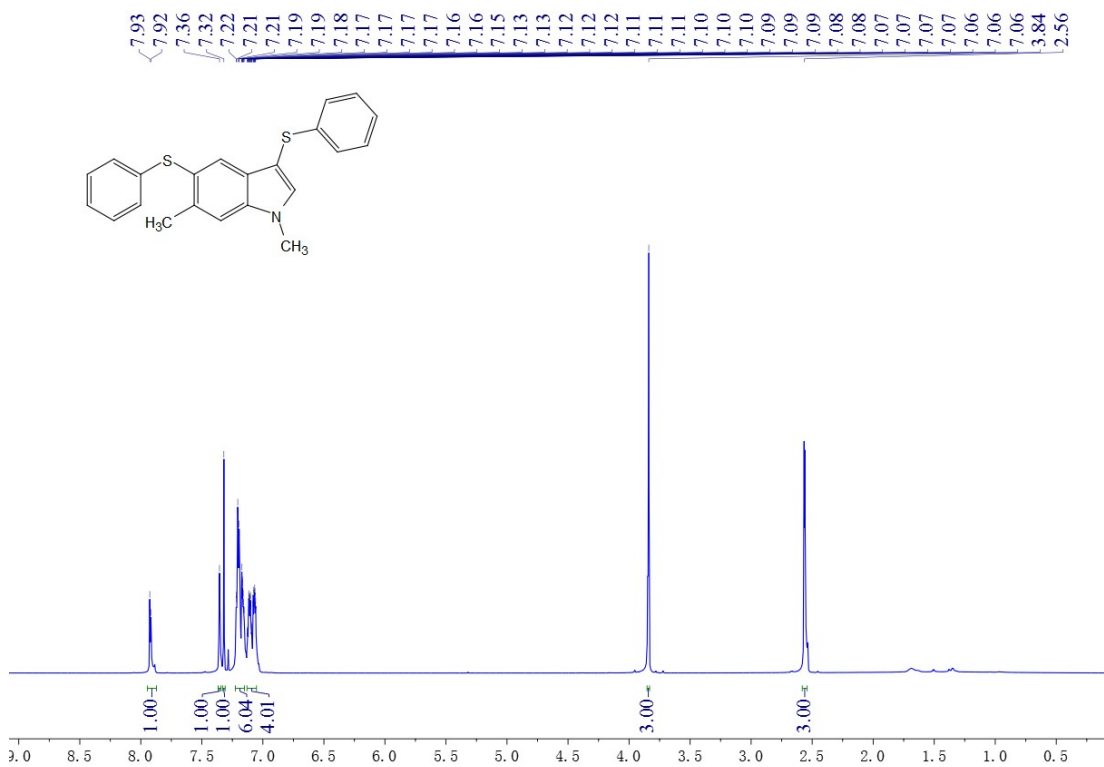

(31)  $^{13}\text{C}$ -NMR (151 MHz,  $\text{CDCl}_3$ ) spectrum of 3ja

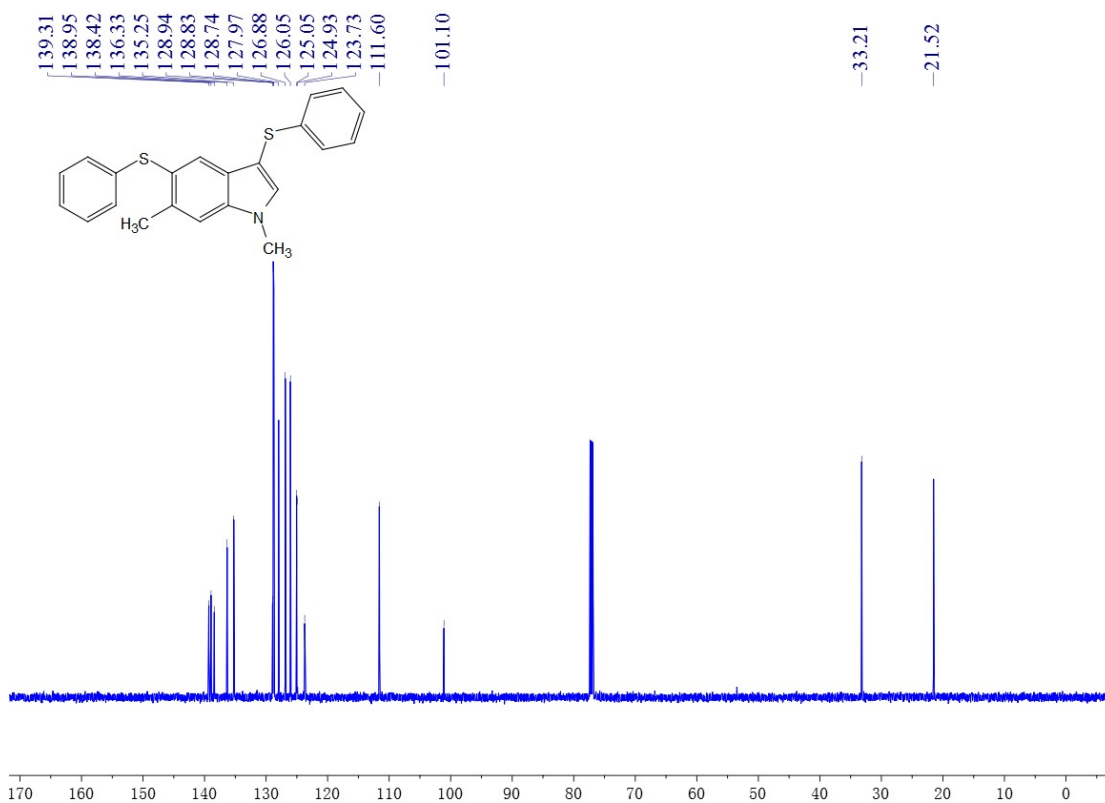

(32)  $^1\text{H}$ -NMR (600 MHz,  $\text{CDCl}_3$ ) spectrum of 3ka

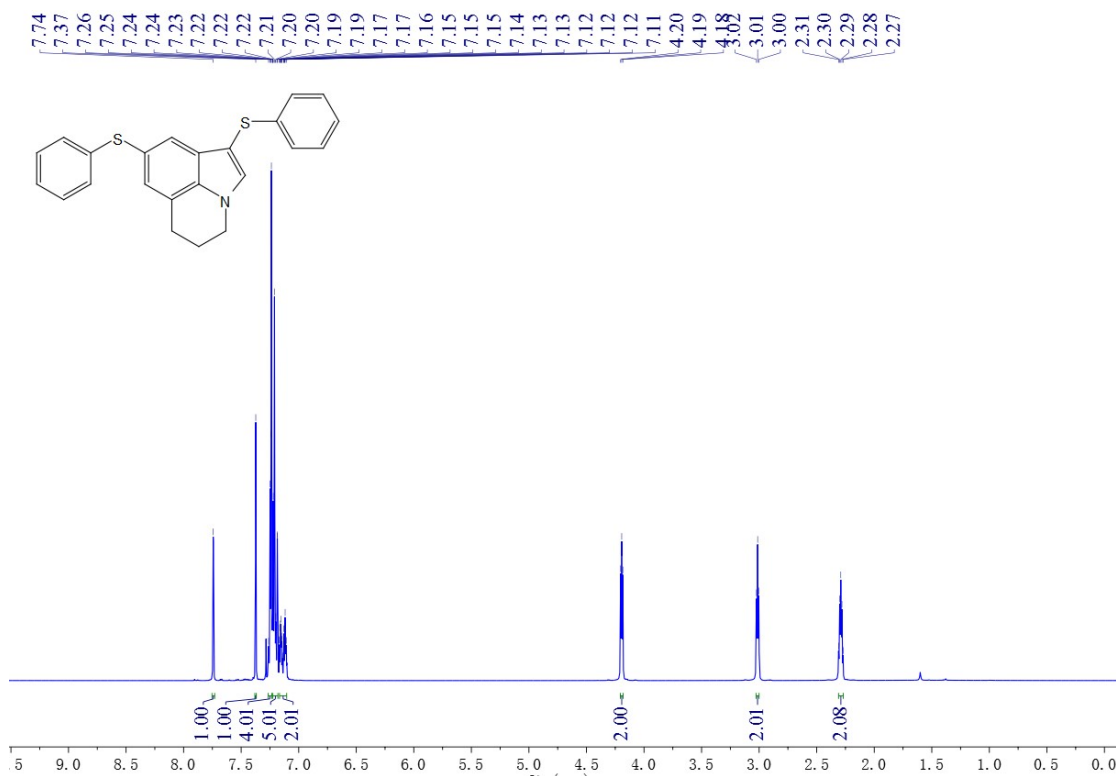

(33)  $^{13}\text{C}$ -NMR (151 MHz,  $\text{CDCl}_3$ ) spectrum of 3ka

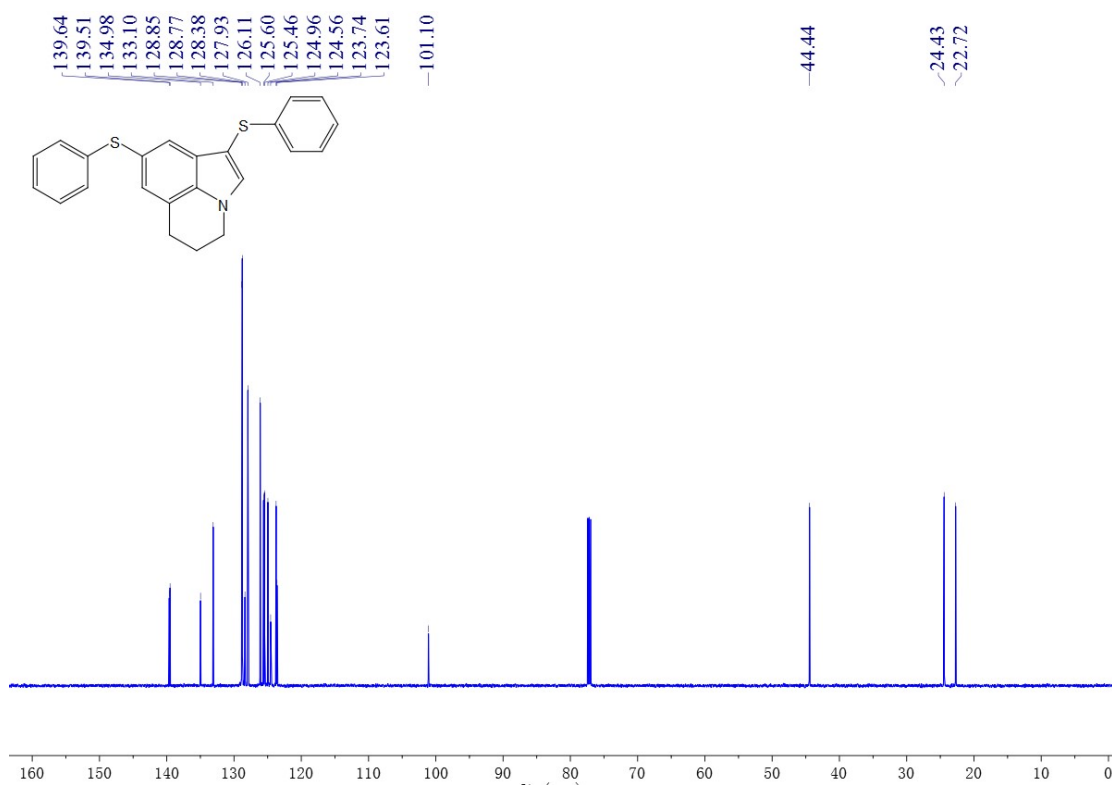

(34)  $^1\text{H}$ -NMR (600 MHz,  $\text{CDCl}_3$ ) spectrum of 3la

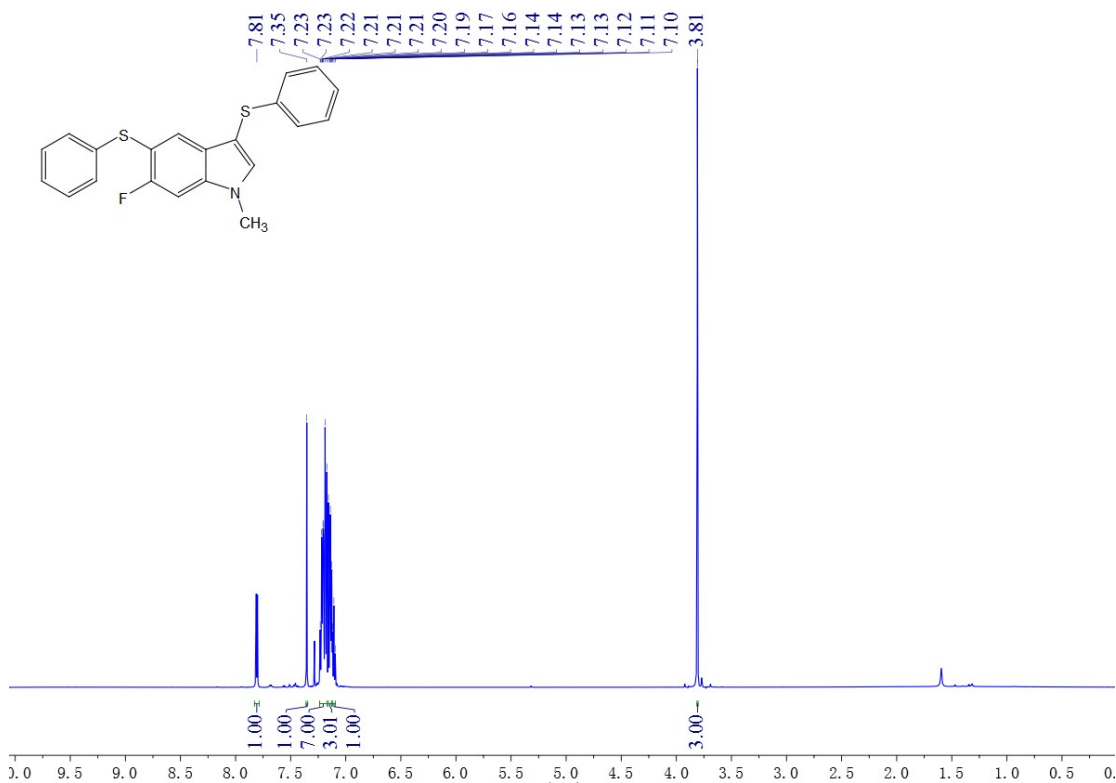

(35)  $^{13}\text{C}$ -NMR (151 MHz,  $\text{CDCl}_3$ ) spectrum of 3la

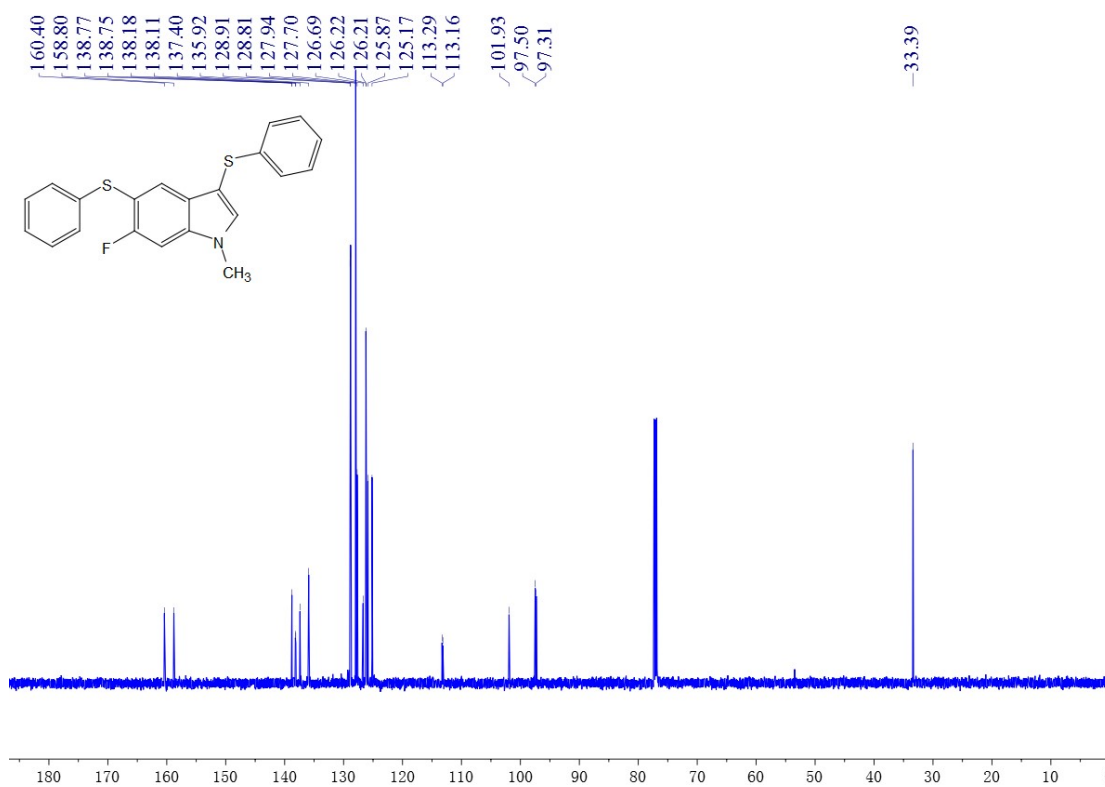

(36)  $^{19}\text{F}$ -NMR (565 MHz,  $\text{CDCl}_3$ ) spectrum of 3la

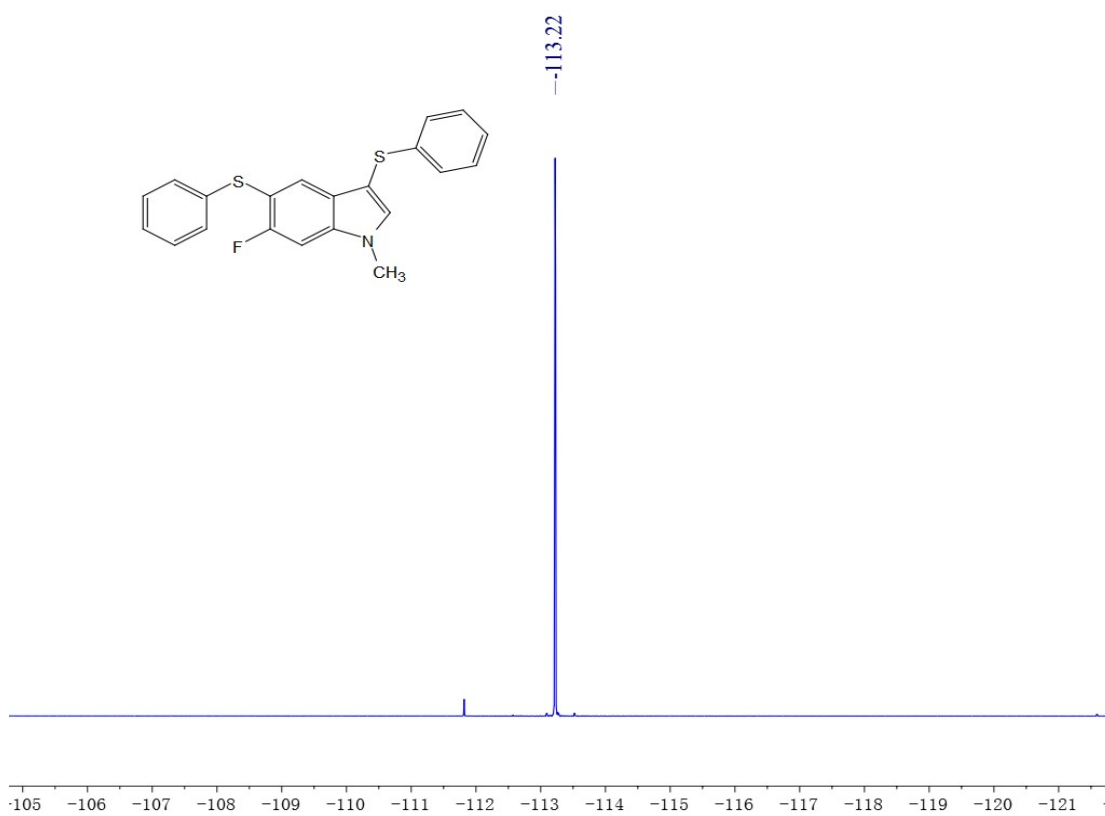

**(37)  $^1\text{H-NMR}$  (600 MHz,  $\text{CDCl}_3$ ) spectrum of 3ma**

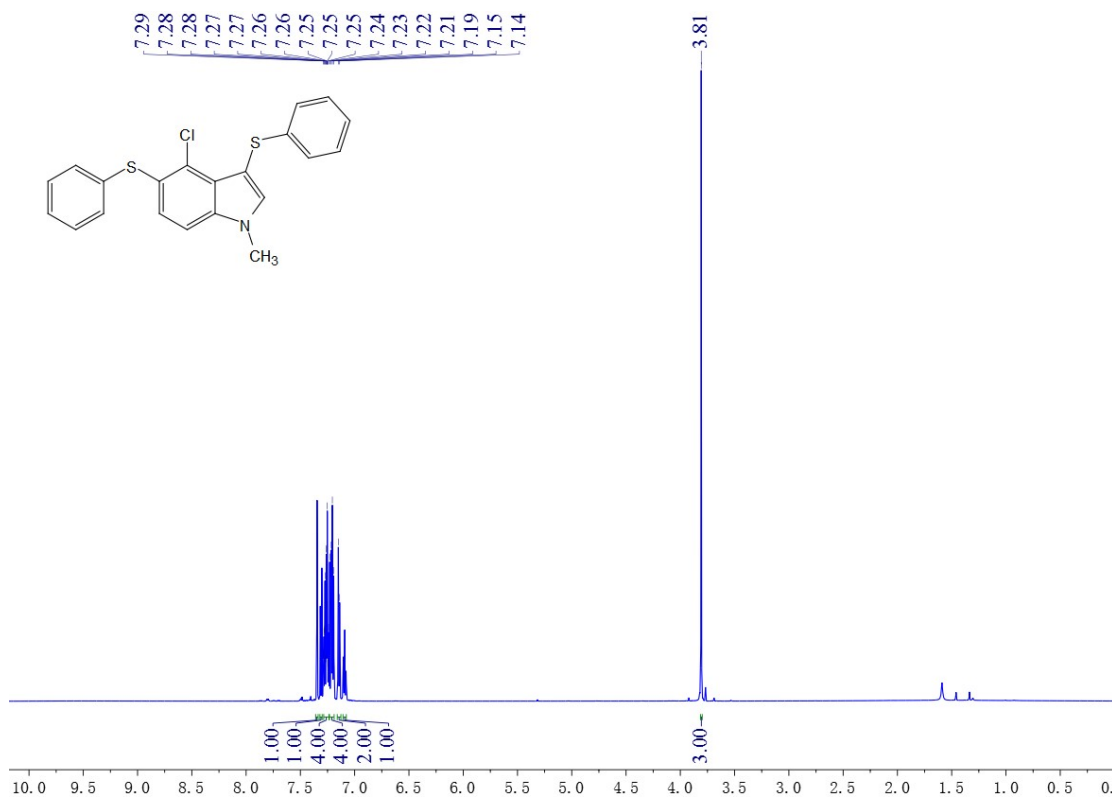

**(38)  $^{13}\text{C-NMR}$  (151 MHz,  $\text{CDCl}_3$ ) spectrum of 3ma**

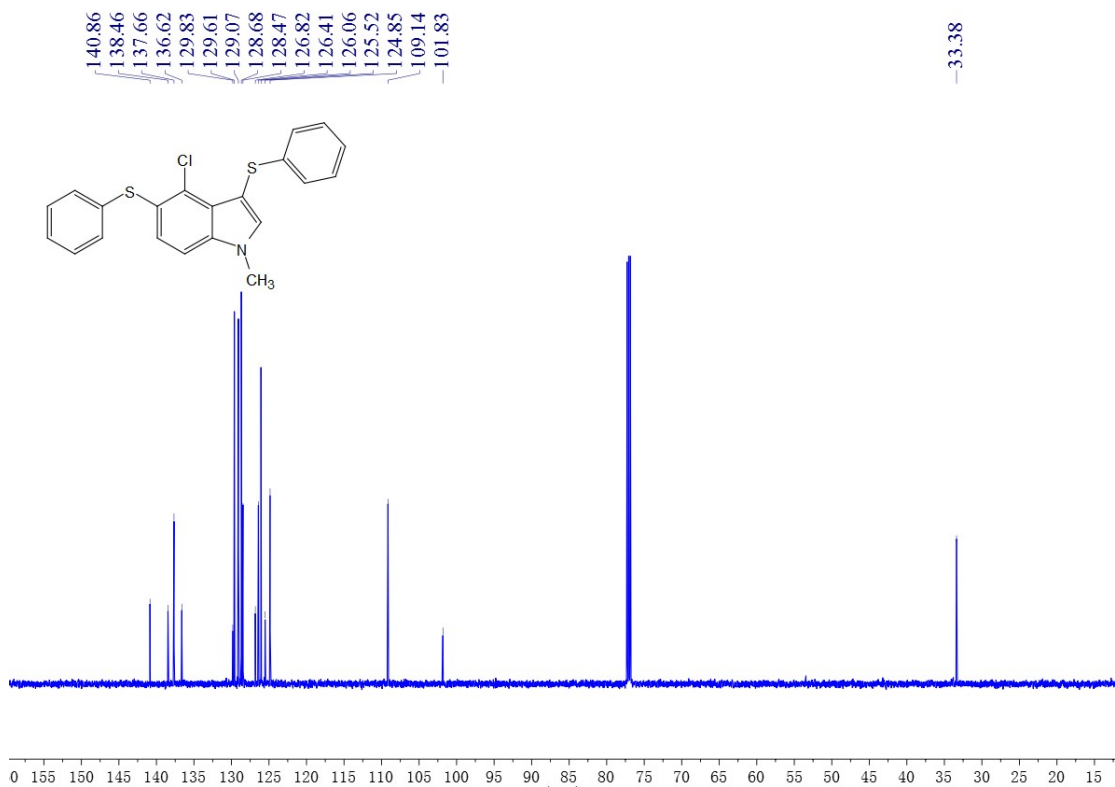

**(39)  $^1\text{H-NMR}$  (600 MHz,  $\text{CDCl}_3$ ) spectrum of 3na**

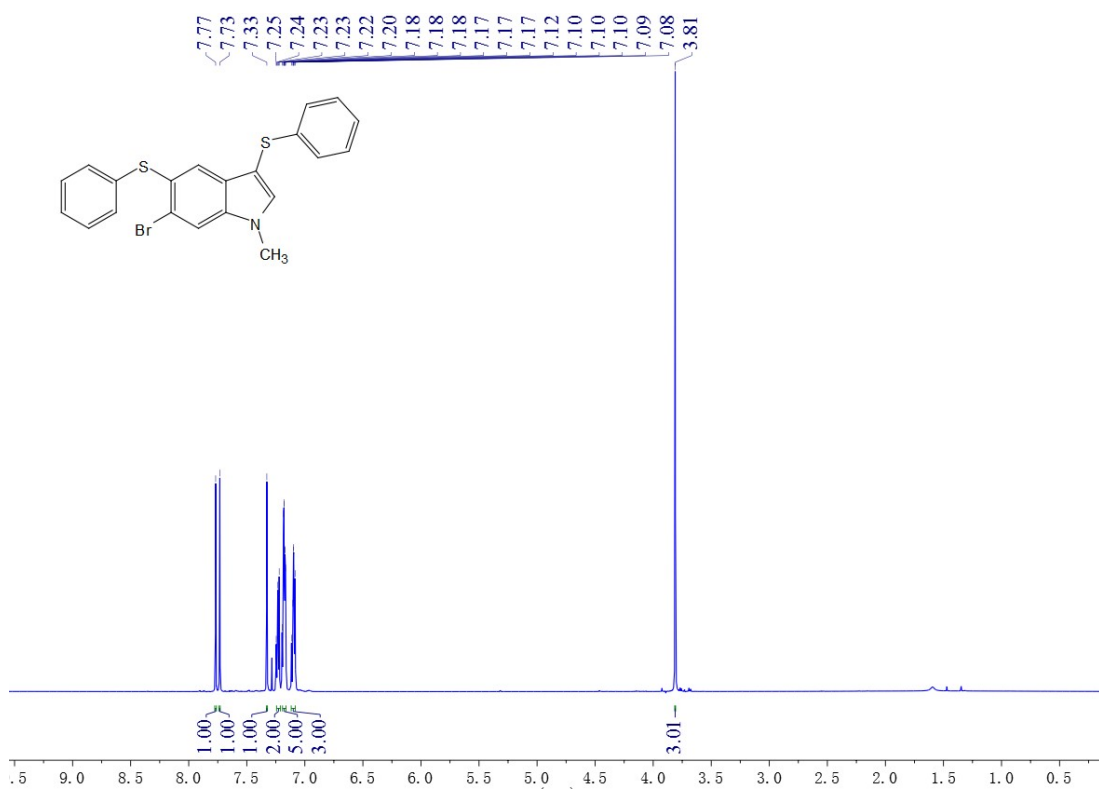

**(40)  $^{13}\text{C-NMR}$  (151 MHz,  $\text{CDCl}_3$ ) spectrum of 3na**

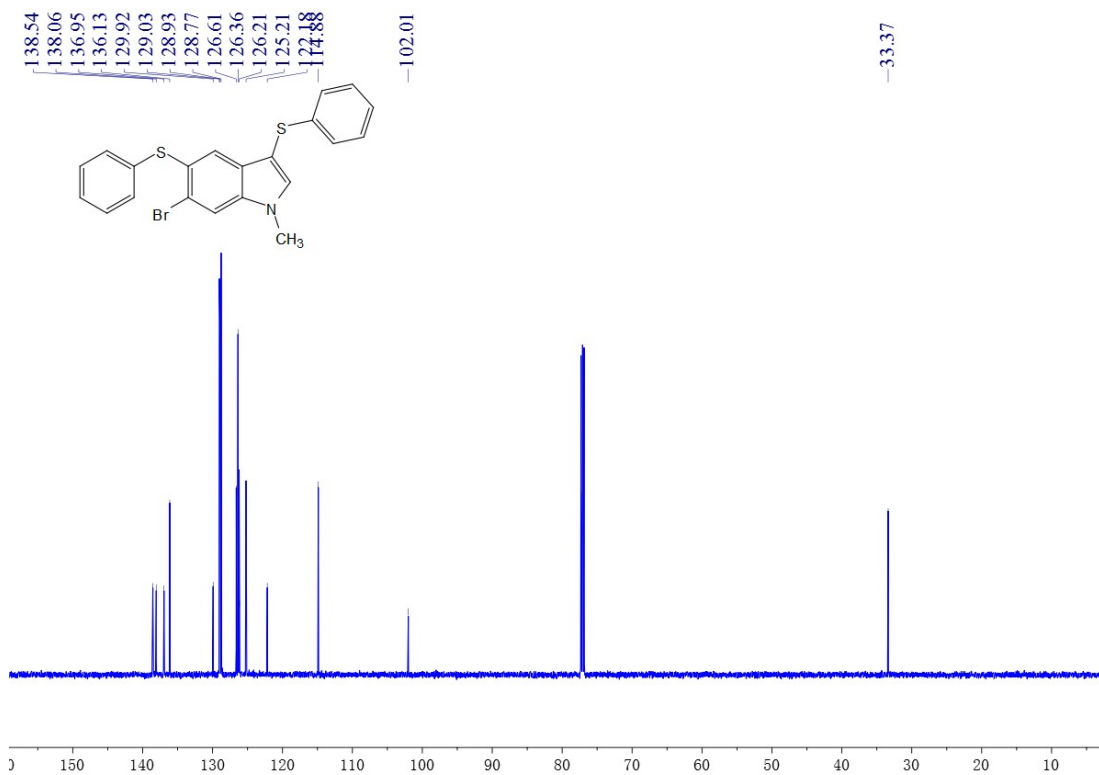



(41)  $^1\text{H-NMR}$  (600 MHz,  $\text{CDCl}_3$ ) spectrum of 30a

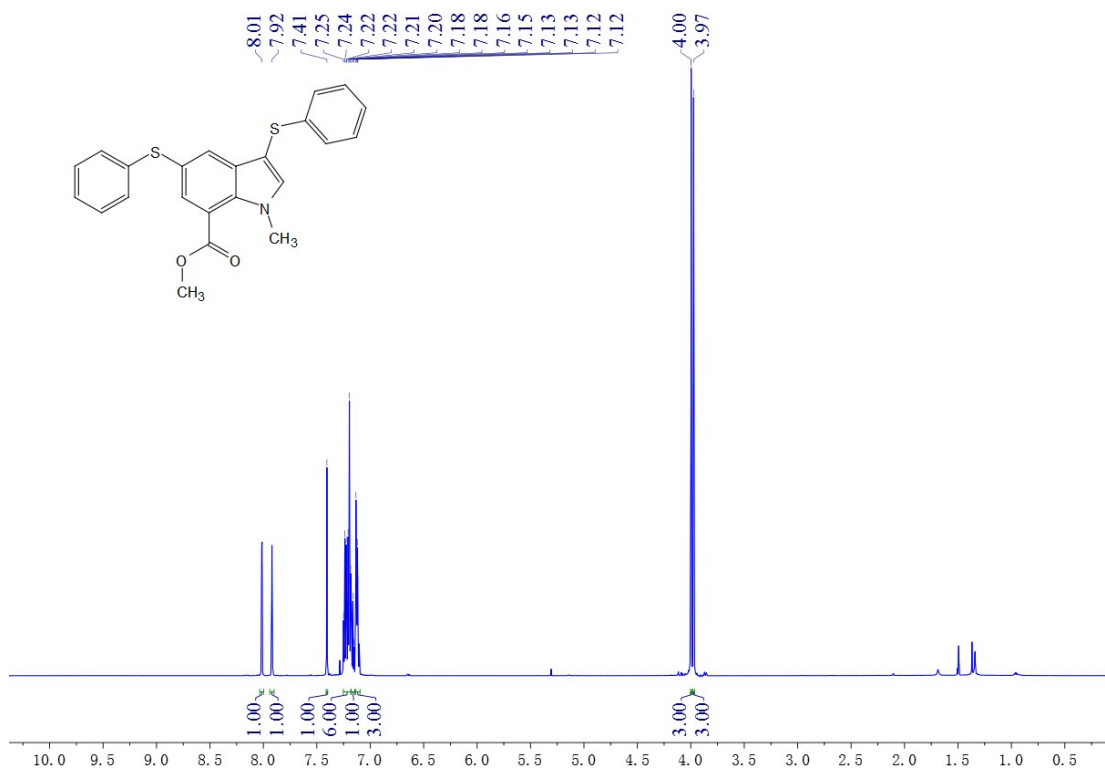

(42)  $^{13}\text{C-NMR}$  (151 MHz,  $\text{CDCl}_3$ ) spectrum of 30a

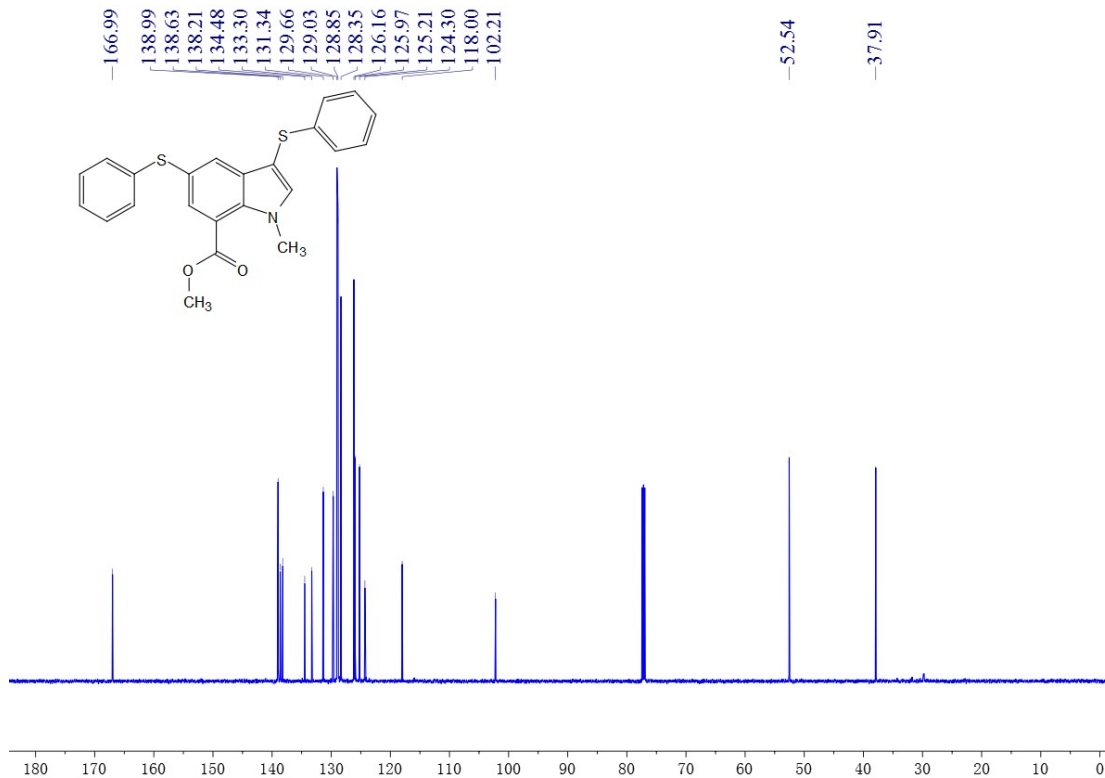

(43)  $^1\text{H-NMR}$  (600 MHz,  $\text{CDCl}_3$ ) spectrum of 3pa

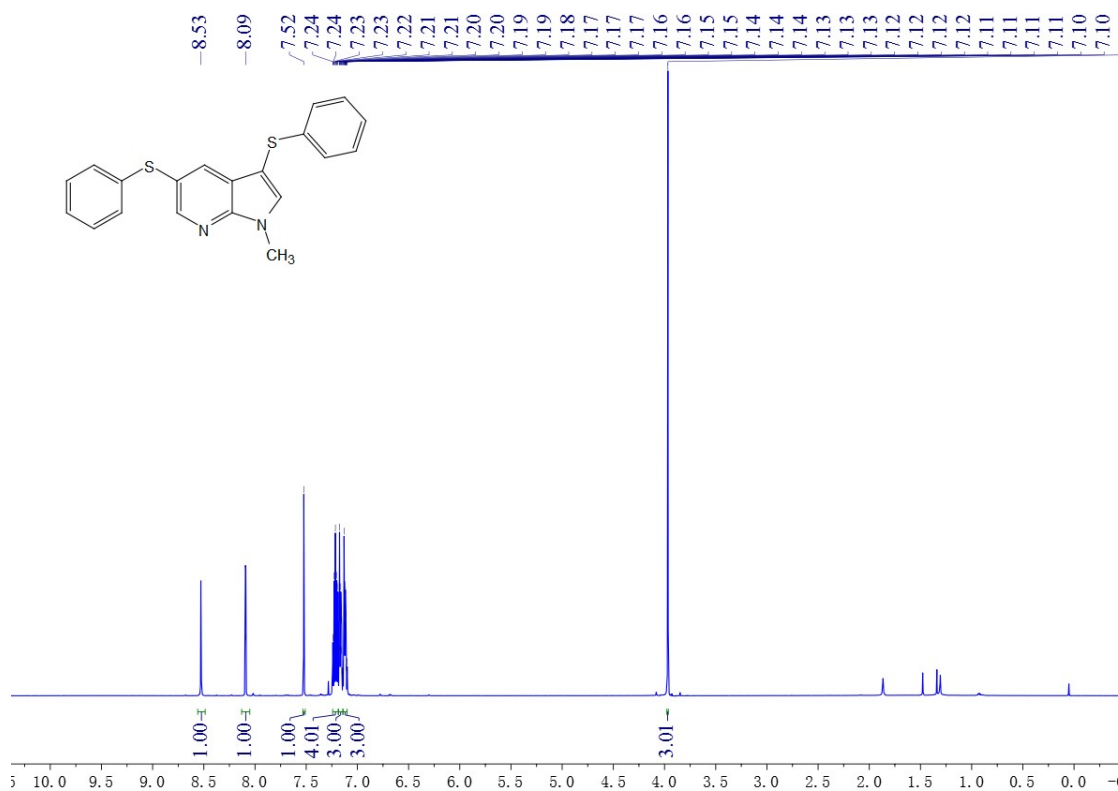

(44)  $^{13}\text{C-NMR}$  (151 MHz,  $\text{CDCl}_3$ ) spectrum of 3pa

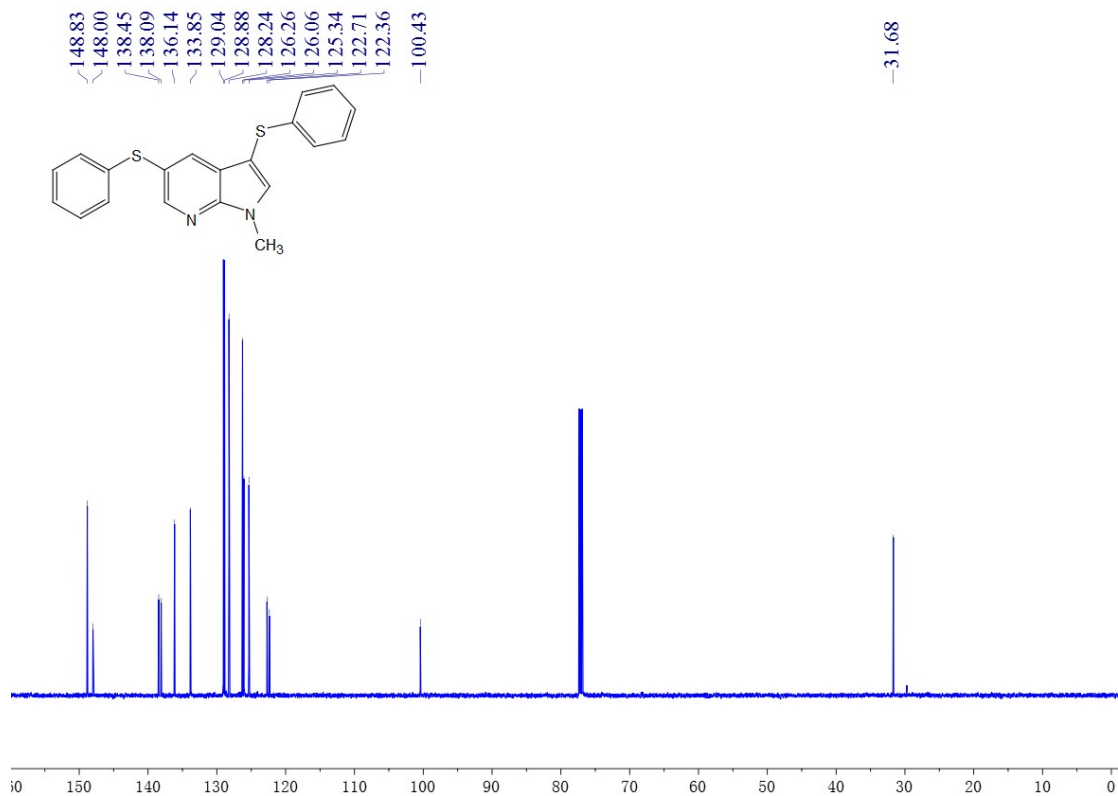

(45)  $^1\text{H-NMR}$  (500 MHz,  $\text{CDCl}_3$ ) spectrum of 3ab

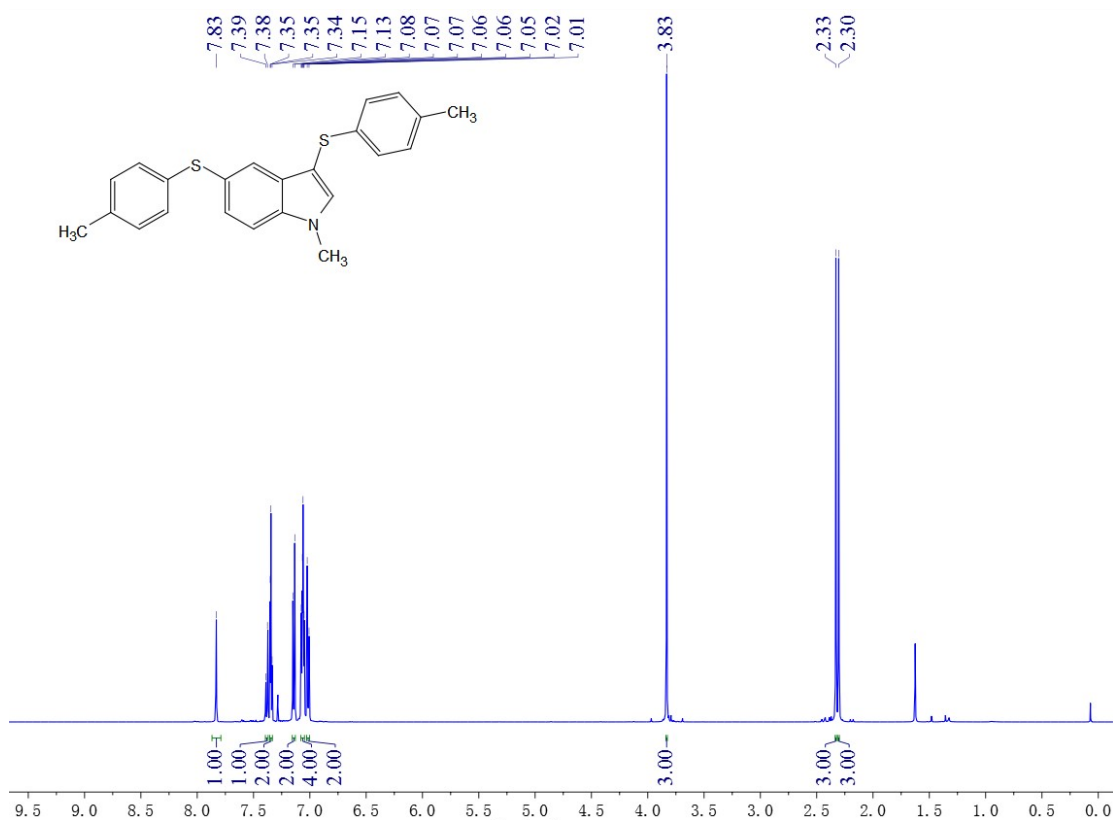

(46)  $^{13}\text{C-NMR}$  (126 MHz,  $\text{CDCl}_3$ ) spectrum of 3ab

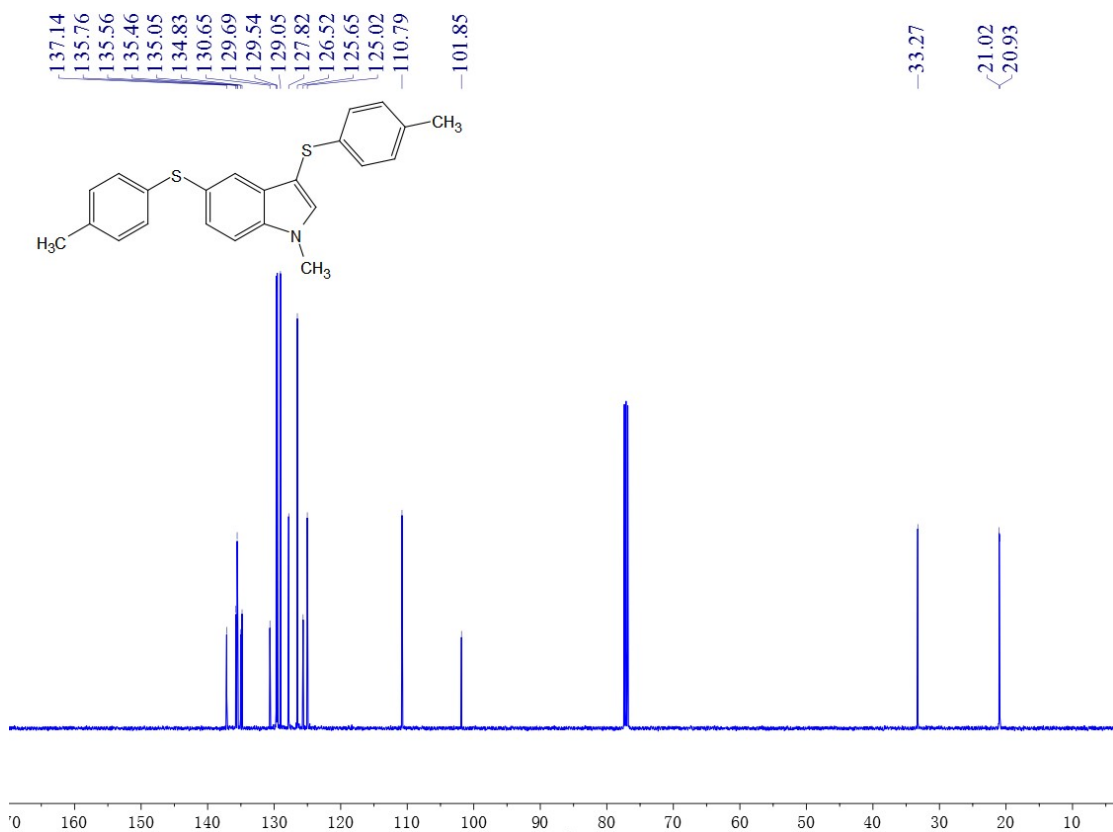

(47)  $^1\text{H-NMR}$  (600 MHz,  $\text{CDCl}_3$ ) spectrum of 3ac

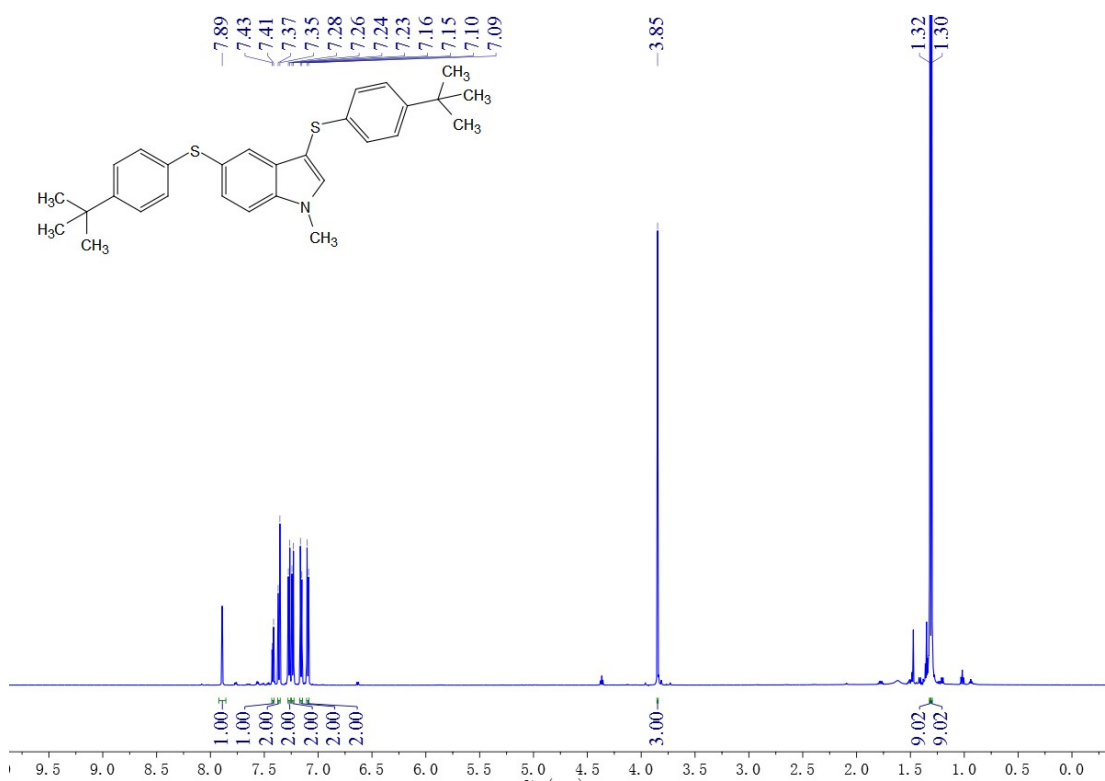

(48)  $^{13}\text{C-NMR}$  (151 MHz,  $\text{CDCl}_3$ ) spectrum of 3ac

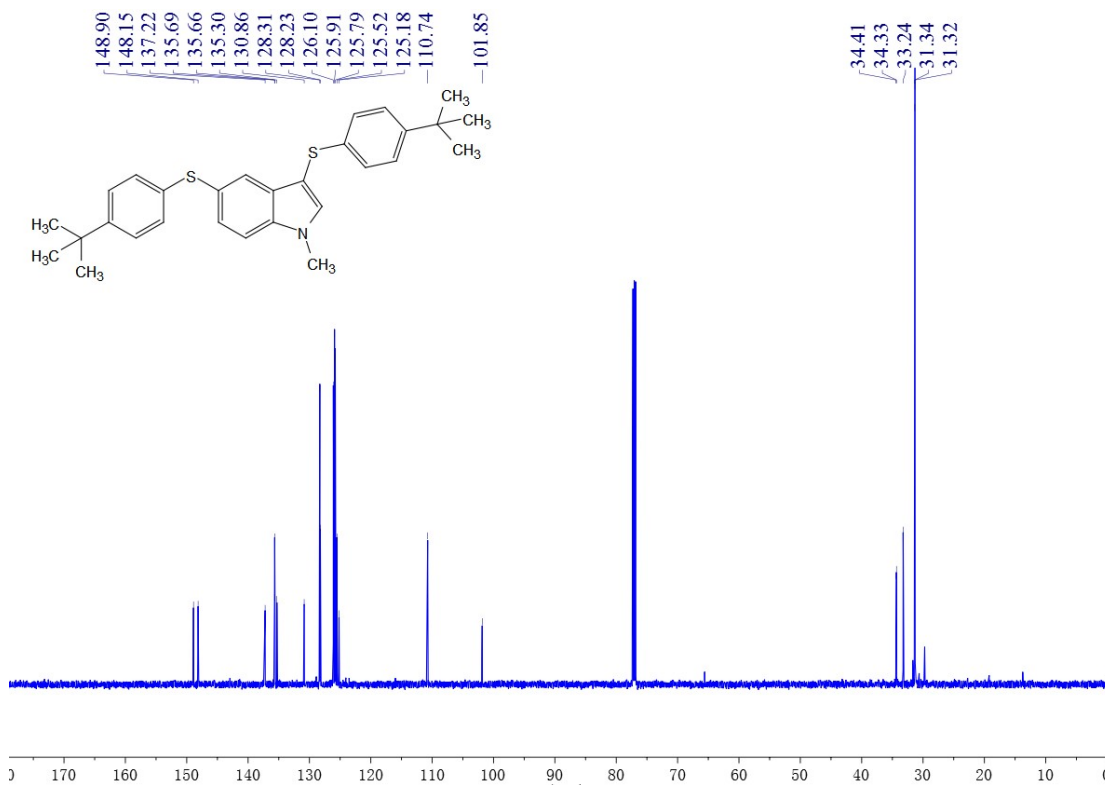

(49)  $^1\text{H-NMR}$  (600 MHz,  $\text{CDCl}_3$ ) spectrum of 3ad

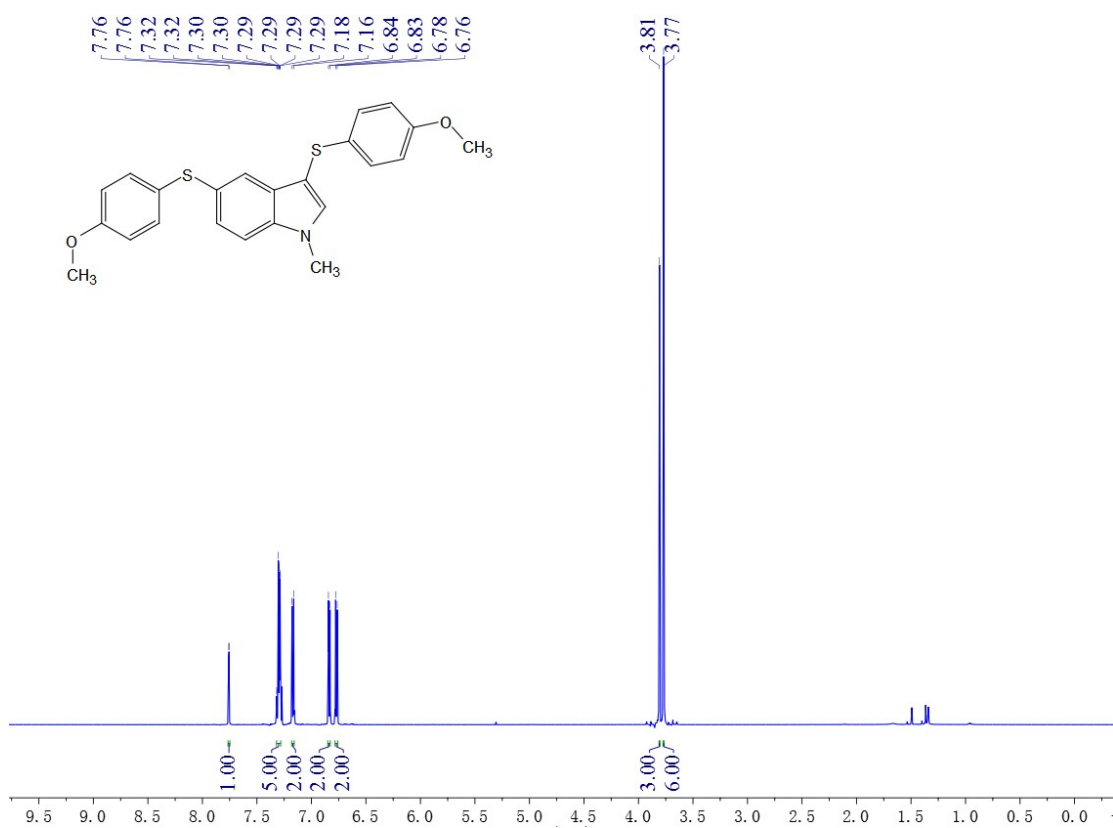

(50)  $^{13}\text{C-NMR}$  (151 MHz,  $\text{CDCl}_3$ ) spectrum of 3ad

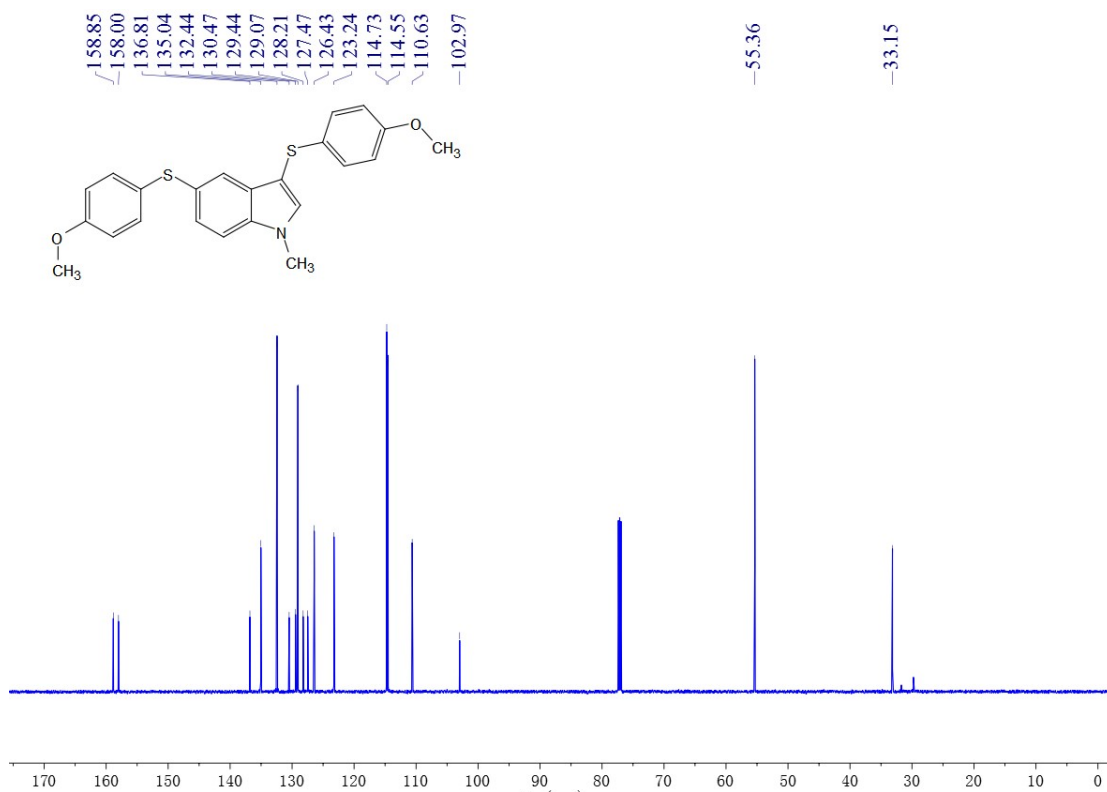

(51) <sup>1</sup>H-NMR (600 MHz, CDCl<sub>3</sub>) spectrum of 3ae

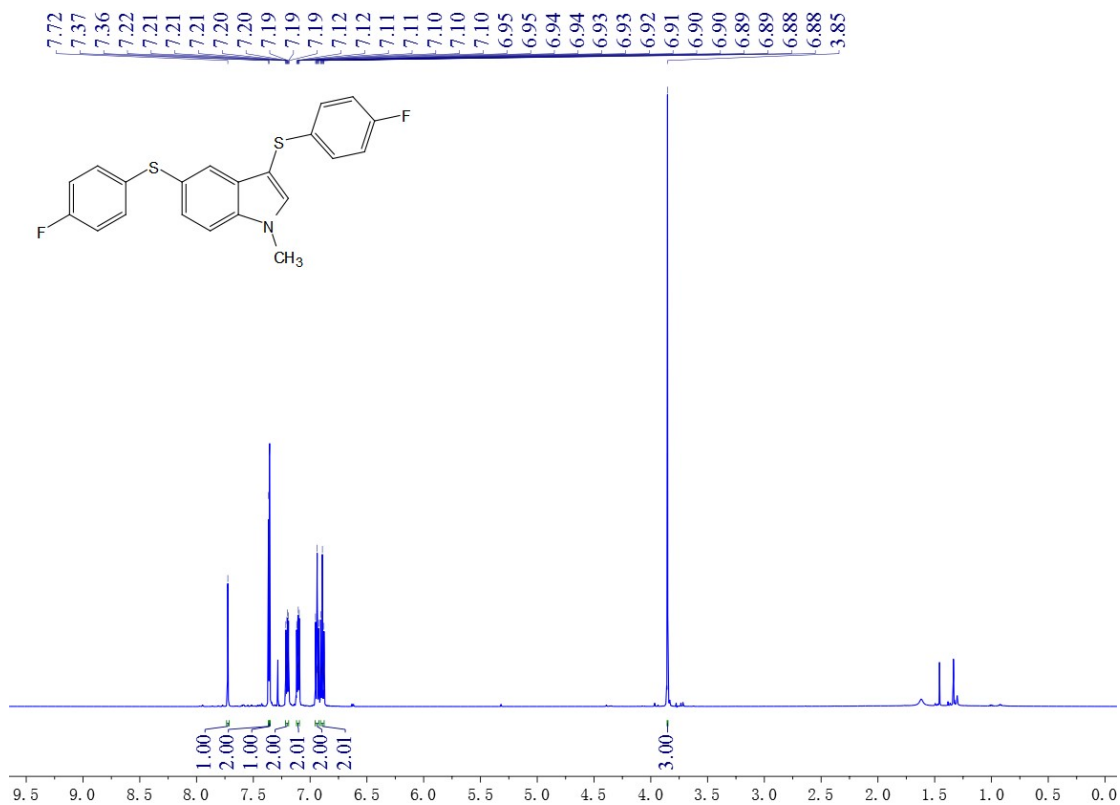

(52) <sup>13</sup>C-NMR (151 MHz, CDCl<sub>3</sub>) spectrum of 3ae

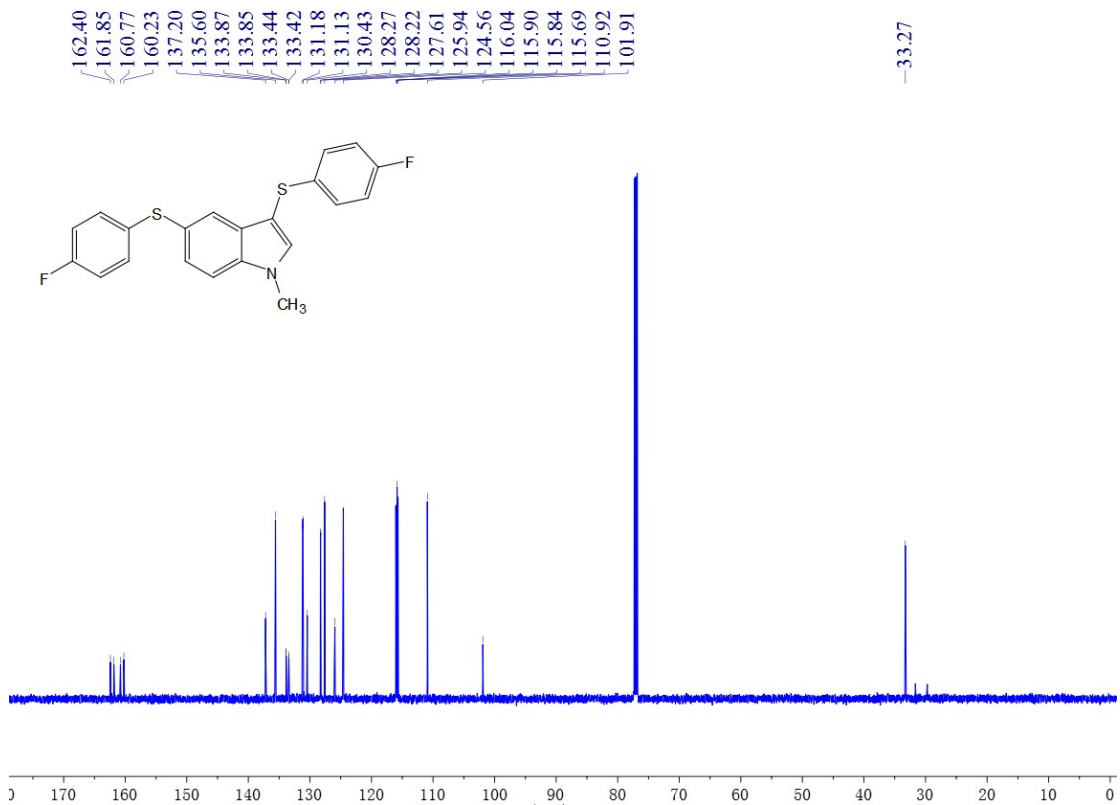

(53)  $^{19}\text{F}$ -NMR (565 MHz,  $\text{CDCl}_3$ ) spectrum of 3ae

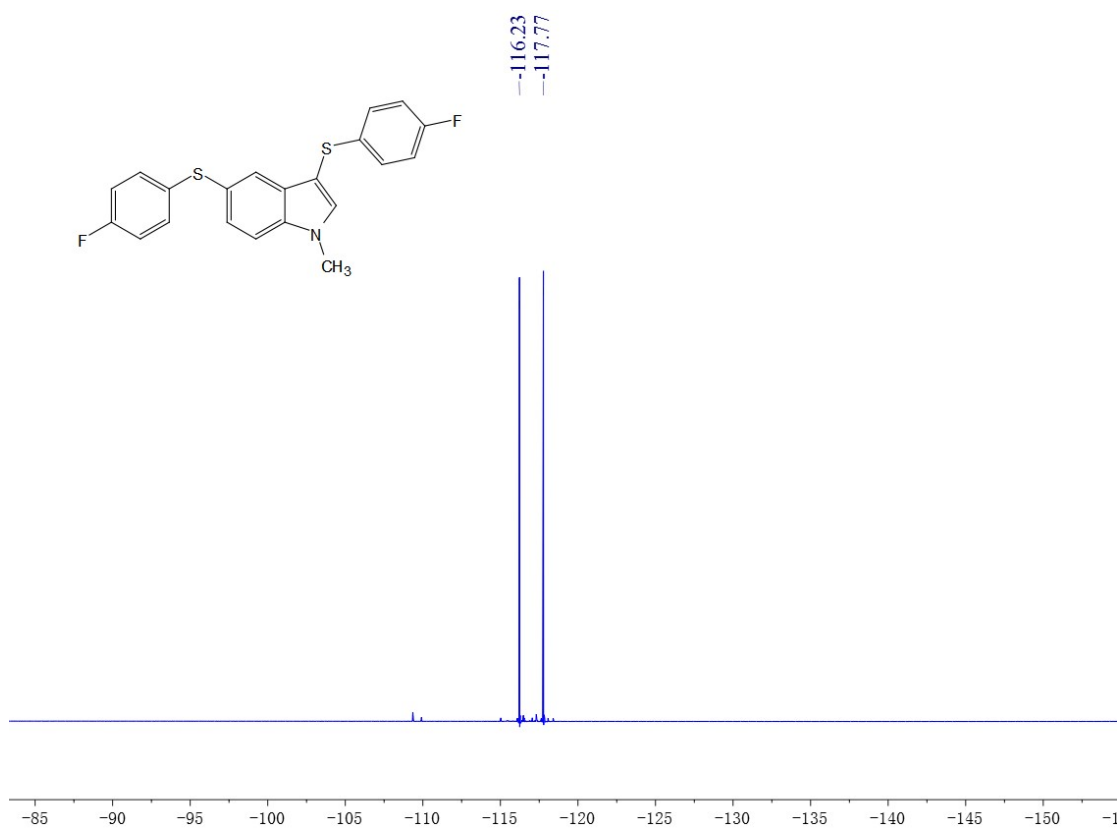

(54)  $^1\text{H}$ -NMR (400 MHz,  $\text{CDCl}_3$ ) spectrum of 3af

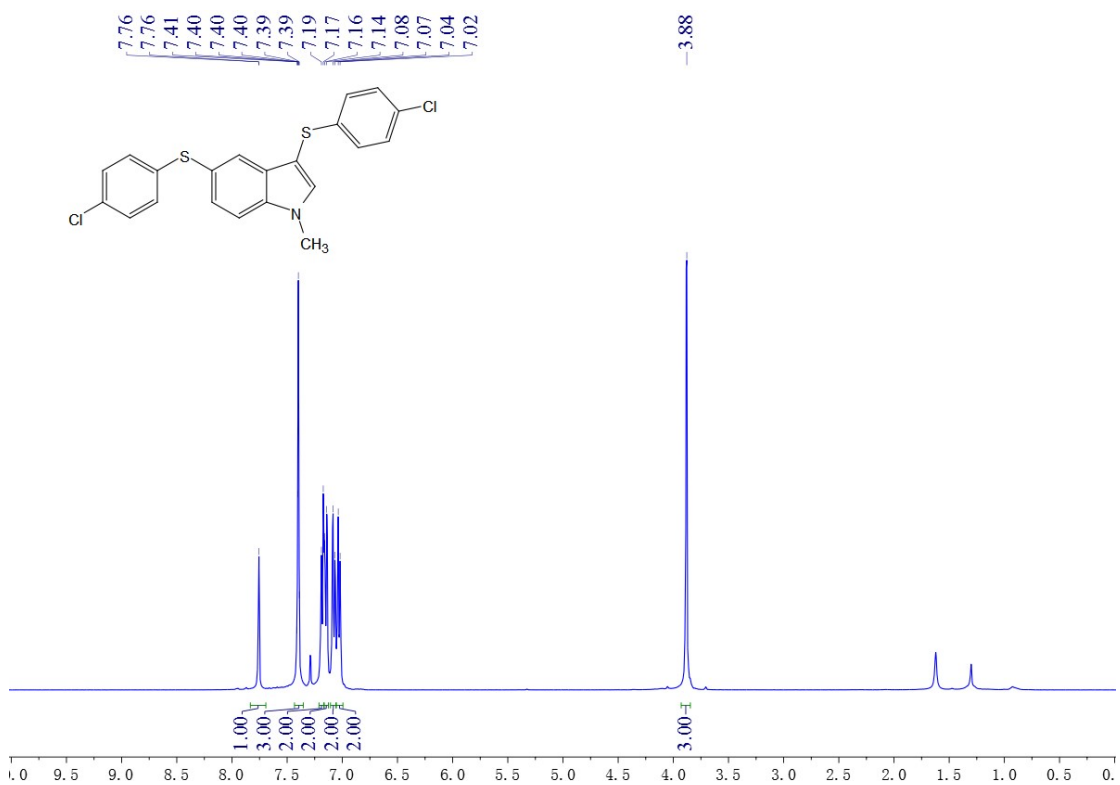

(55)  $^{13}\text{C}$ -NMR (101 MHz,  $\text{CDCl}_3$ ) spectrum of 3af

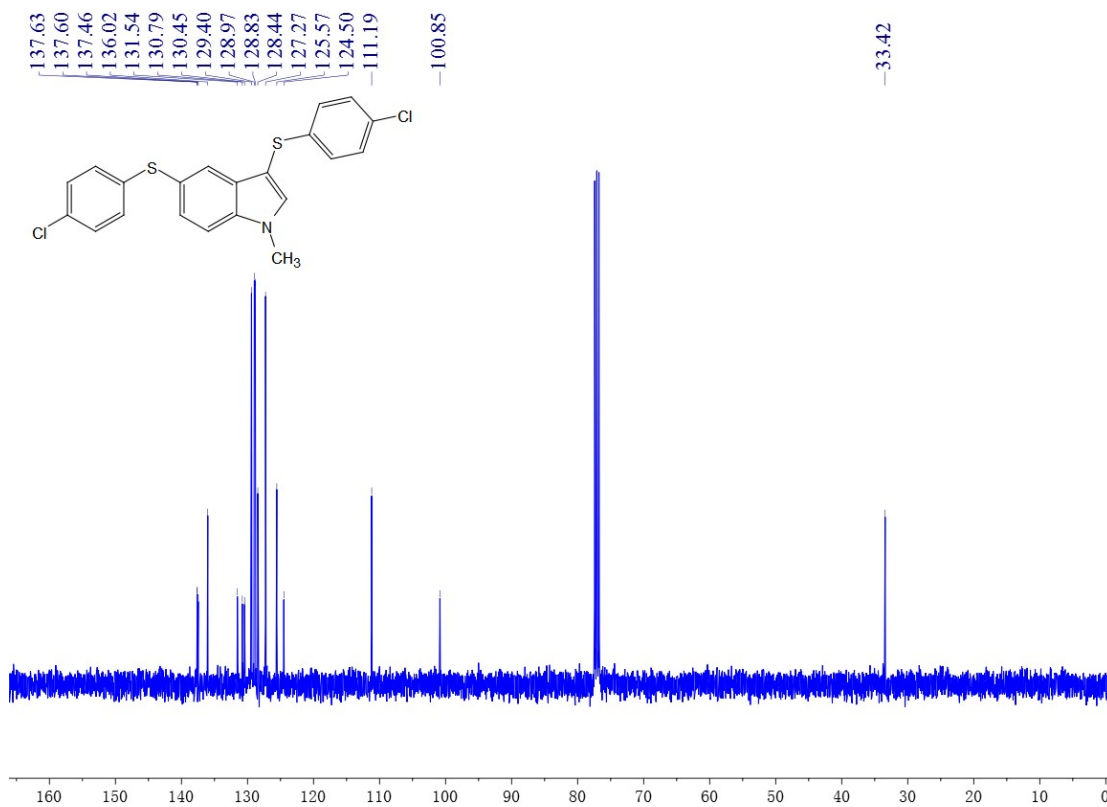

(56)  $^1\text{H}$ -NMR (400 MHz,  $\text{CDCl}_3$ ) spectrum of 3ag

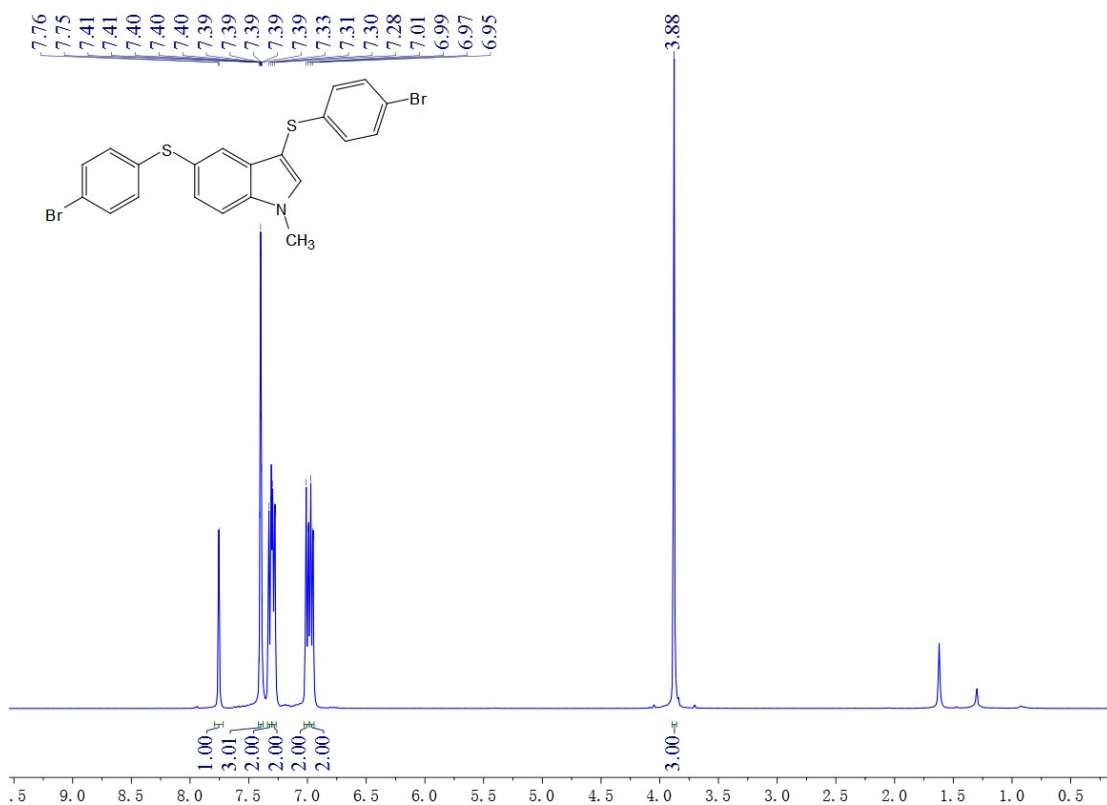



(57)  $^{13}\text{C}$ -NMR (101 MHz,  $\text{CDCl}_3$ ) spectrum of 3ag

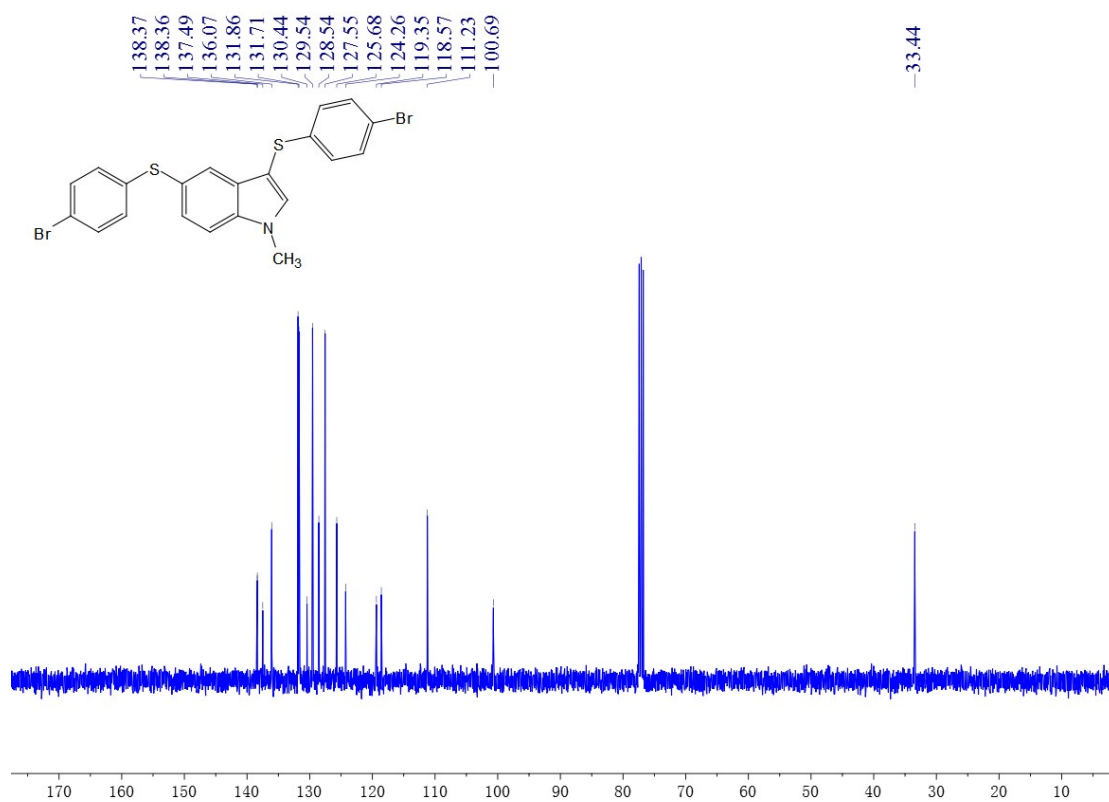

(58)  $^1\text{H}$ -NMR (500 MHz,  $\text{CDCl}_3$ ) spectrum of 3ah

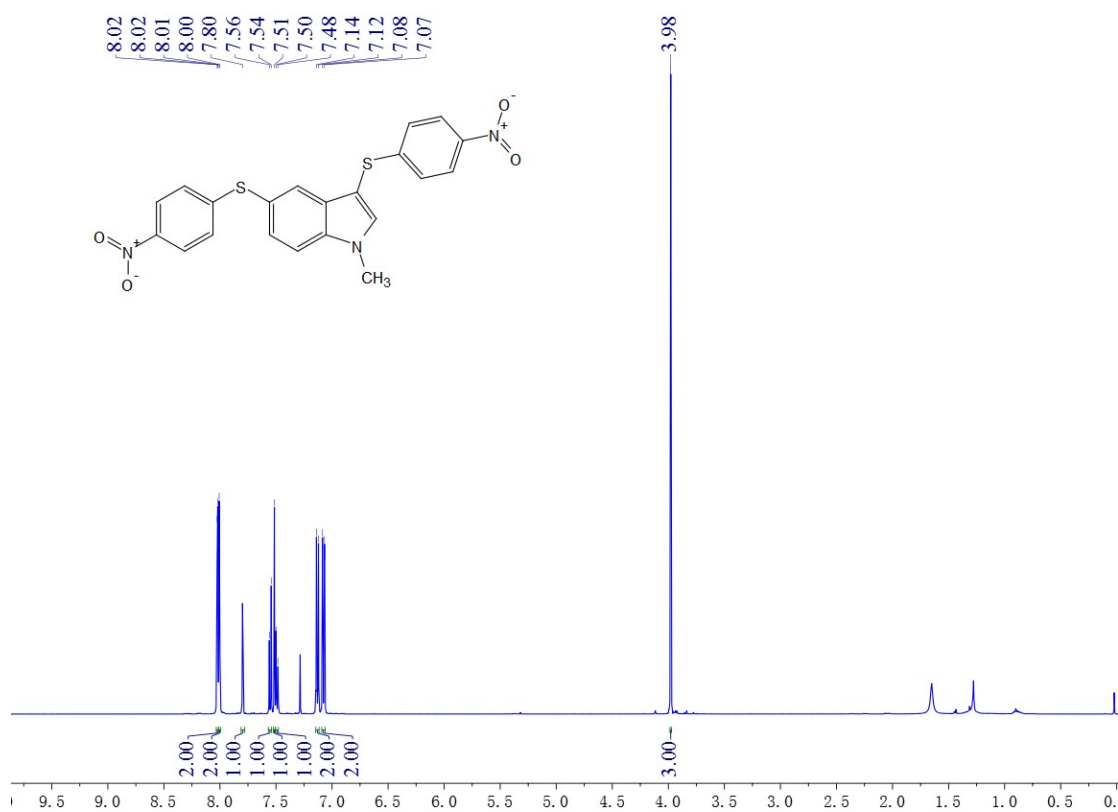

(59)  $^{13}\text{C}$ -NMR (126 MHz,  $\text{CDCl}_3$ ) spectrum of 3ah

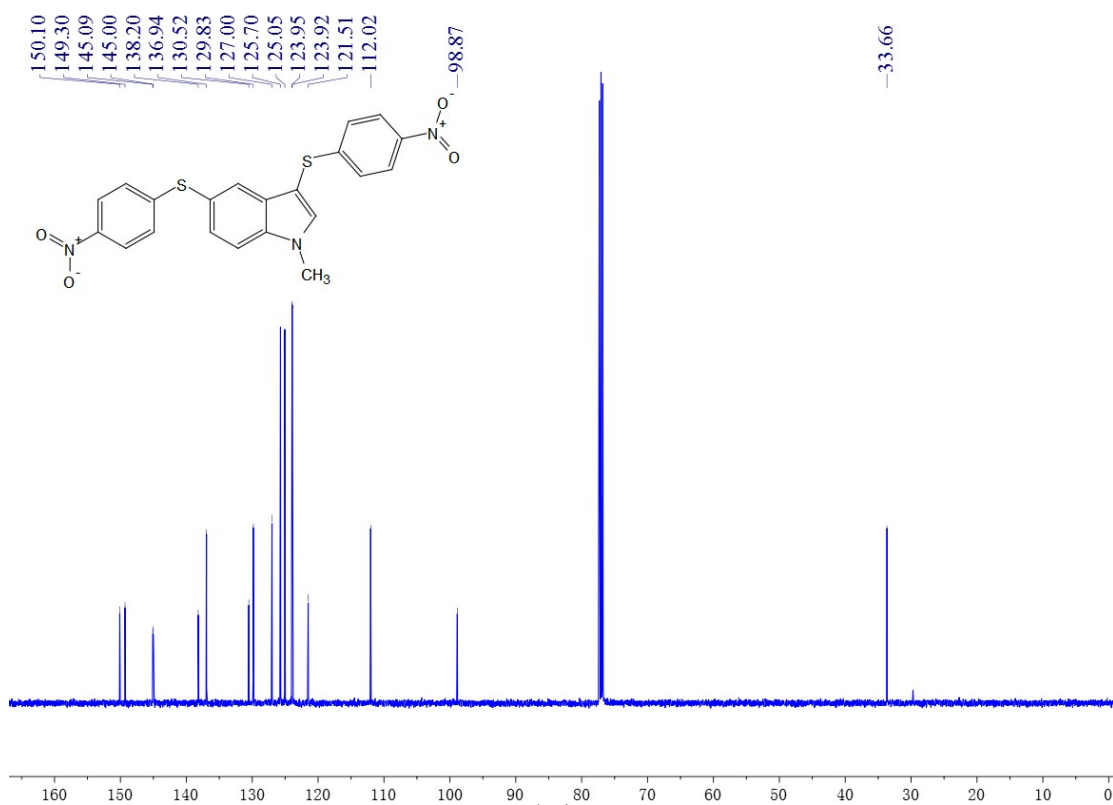

(60)  $^1\text{H}$ -NMR (600 MHz,  $\text{CDCl}_3$ ) spectrum of 3ai

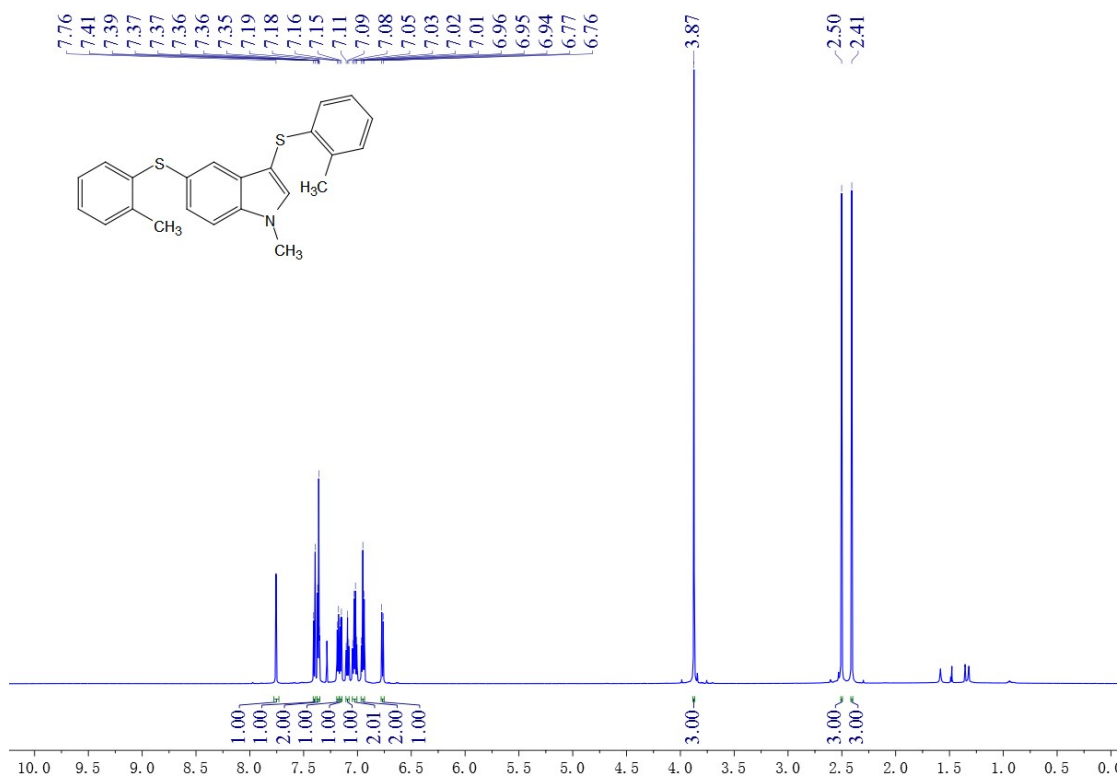

(61)  $^{13}\text{C}$ -NMR (151 MHz,  $\text{CDCl}_3$ ) spectrum of 3ai

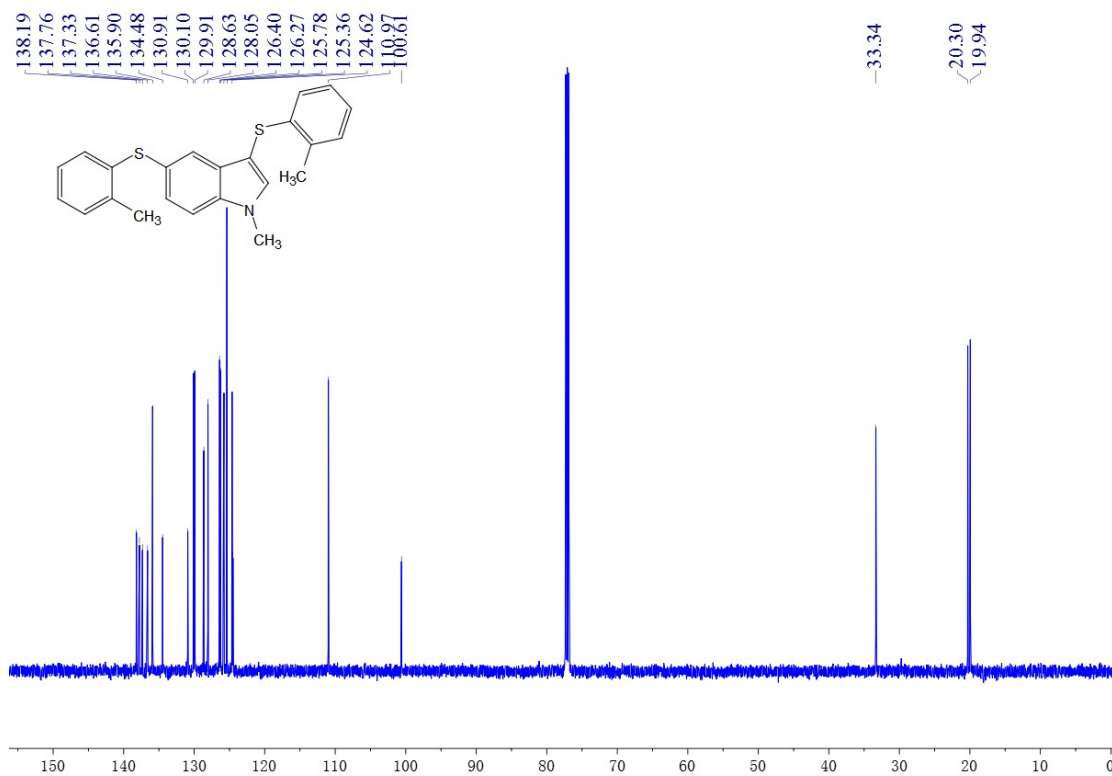

(62)  $^1\text{H}$ -NMR (400 MHz,  $\text{CDCl}_3$ ) spectrum of 3aj

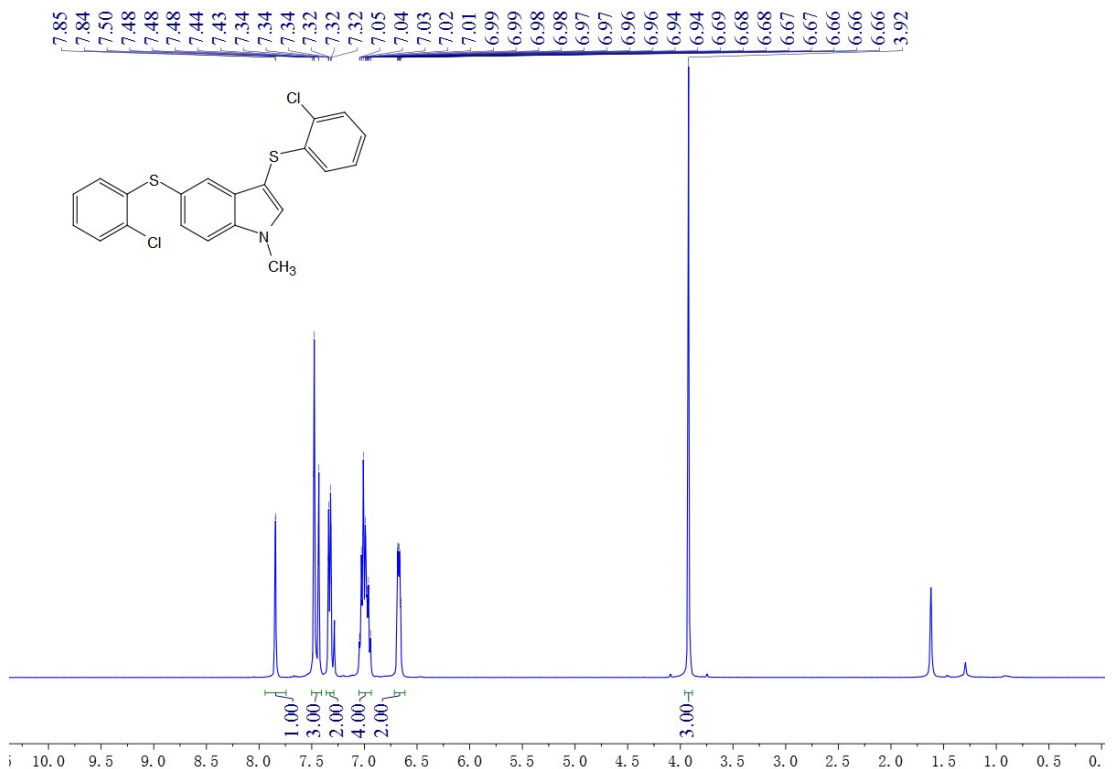

(63)  $^{13}\text{C}$ -NMR (101 MHz,  $\text{CDCl}_3$ ) spectrum of 3aj

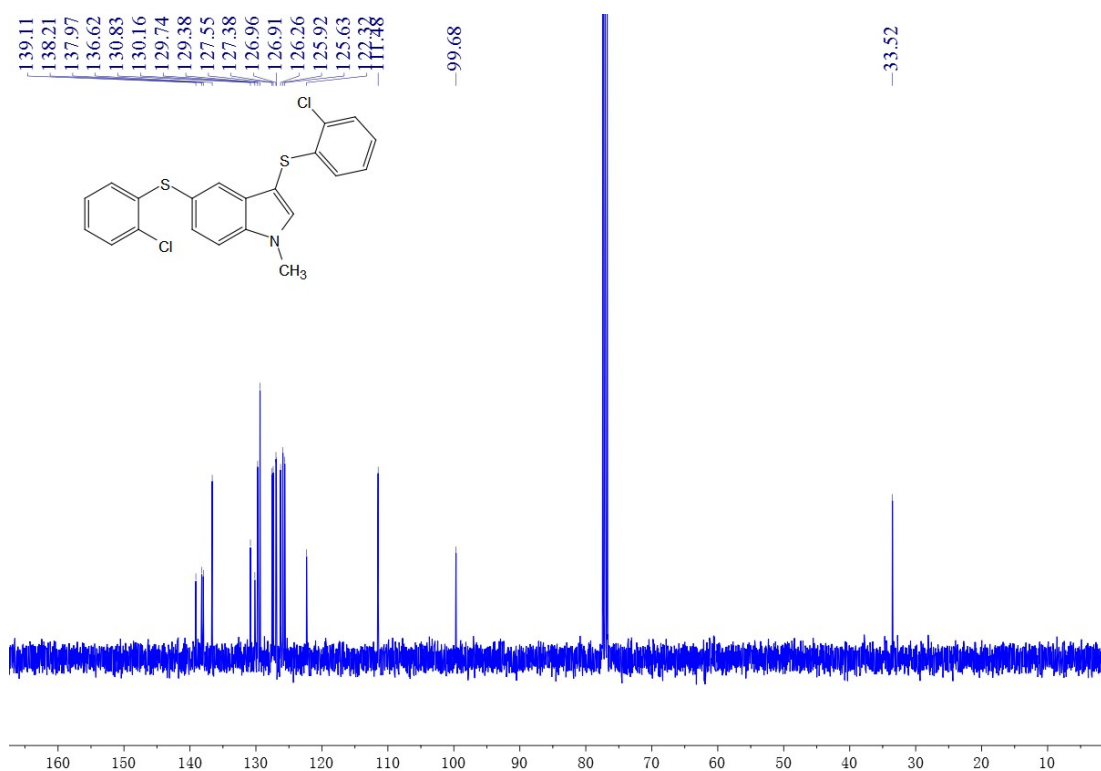

(64)  $^1\text{H}$ -NMR (600 MHz,  $\text{CDCl}_3$ ) spectrum of 3ak

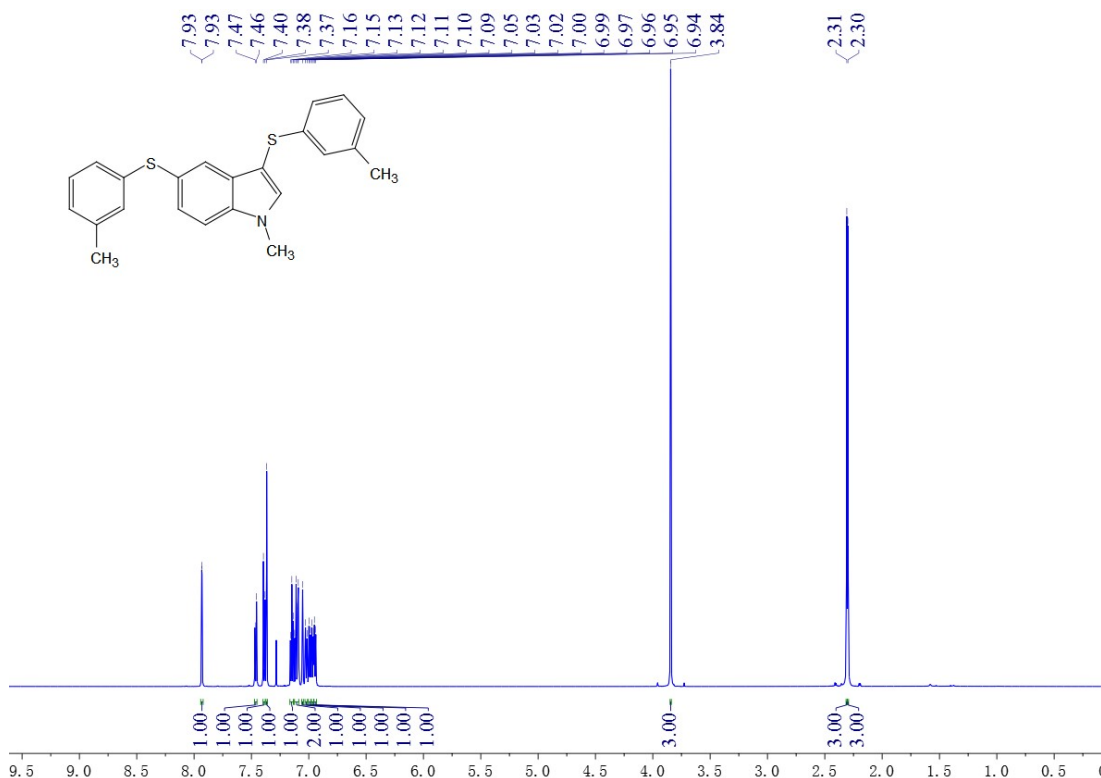

(65)  $^{13}\text{C}$ -NMR (151 MHz,  $\text{CDCl}_3$ ) spectrum of 3ak

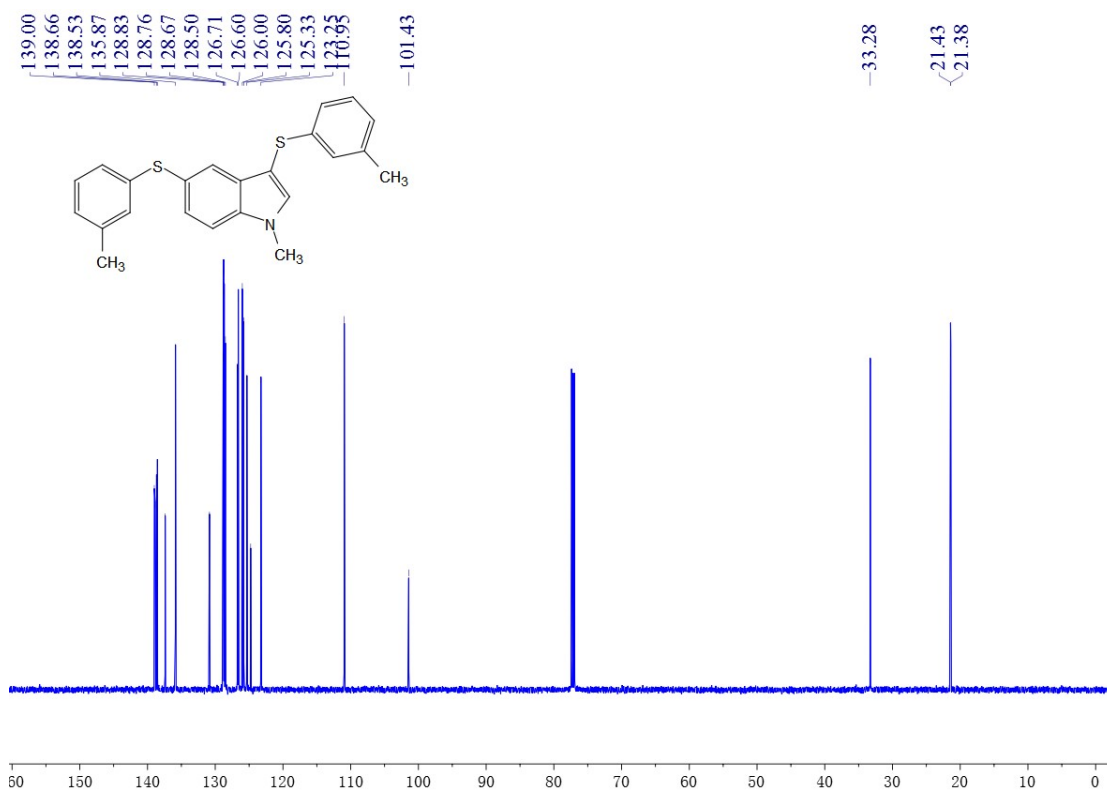

(66)  $^1\text{H}$ -NMR (400 MHz,  $\text{CDCl}_3$ ) spectrum of 3al

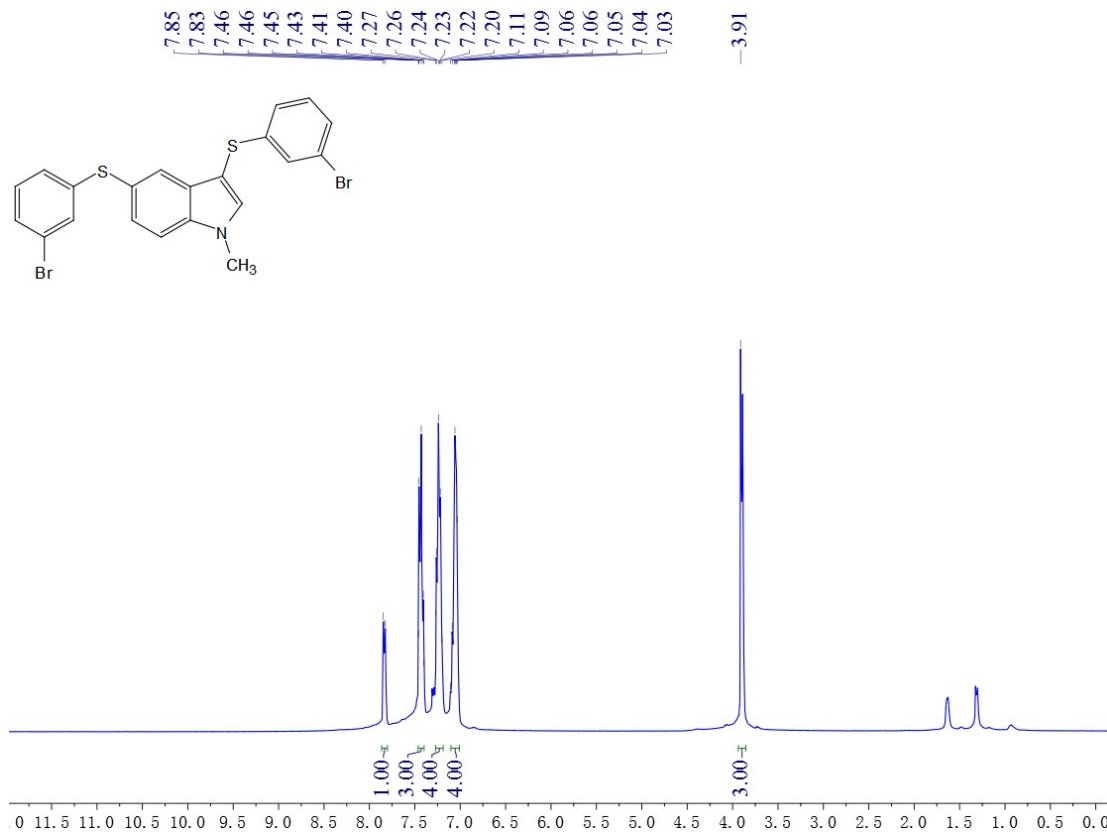

(67)  $^{13}\text{C}$ -NMR (101 MHz,  $\text{CDCl}_3$ ) spectrum of 3al

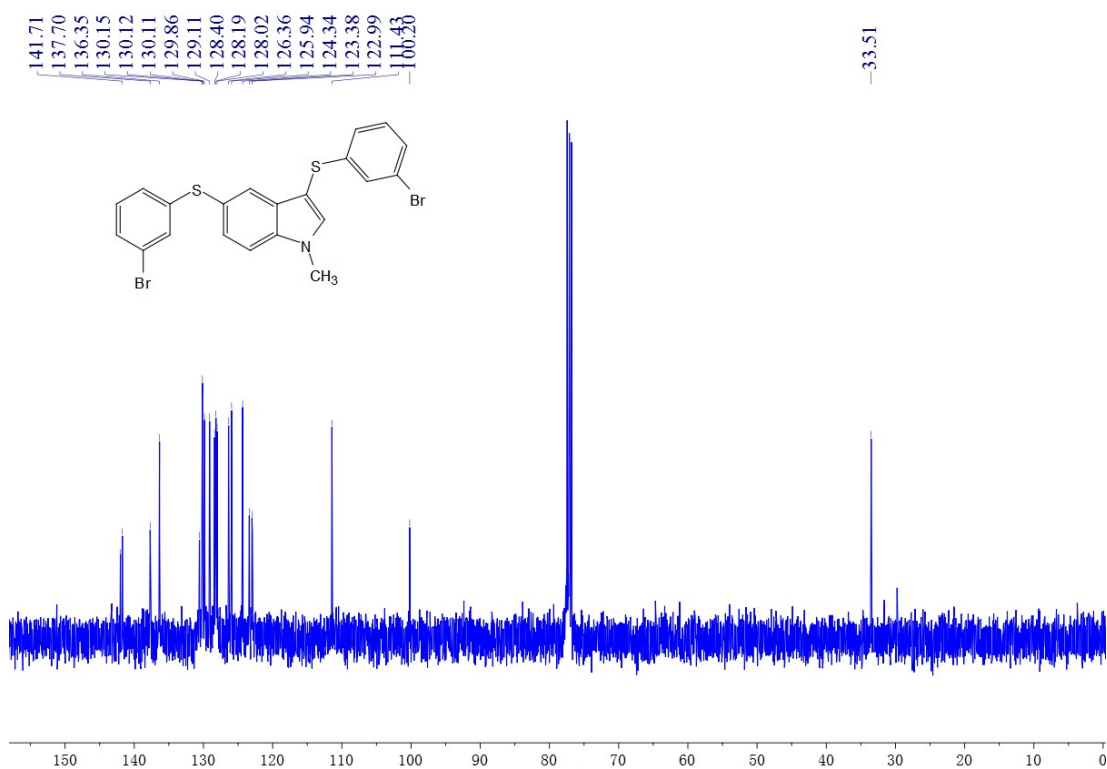

(68)  $^1\text{H}$ -NMR (600 MHz,  $\text{CDCl}_3$ ) spectrum of 3am

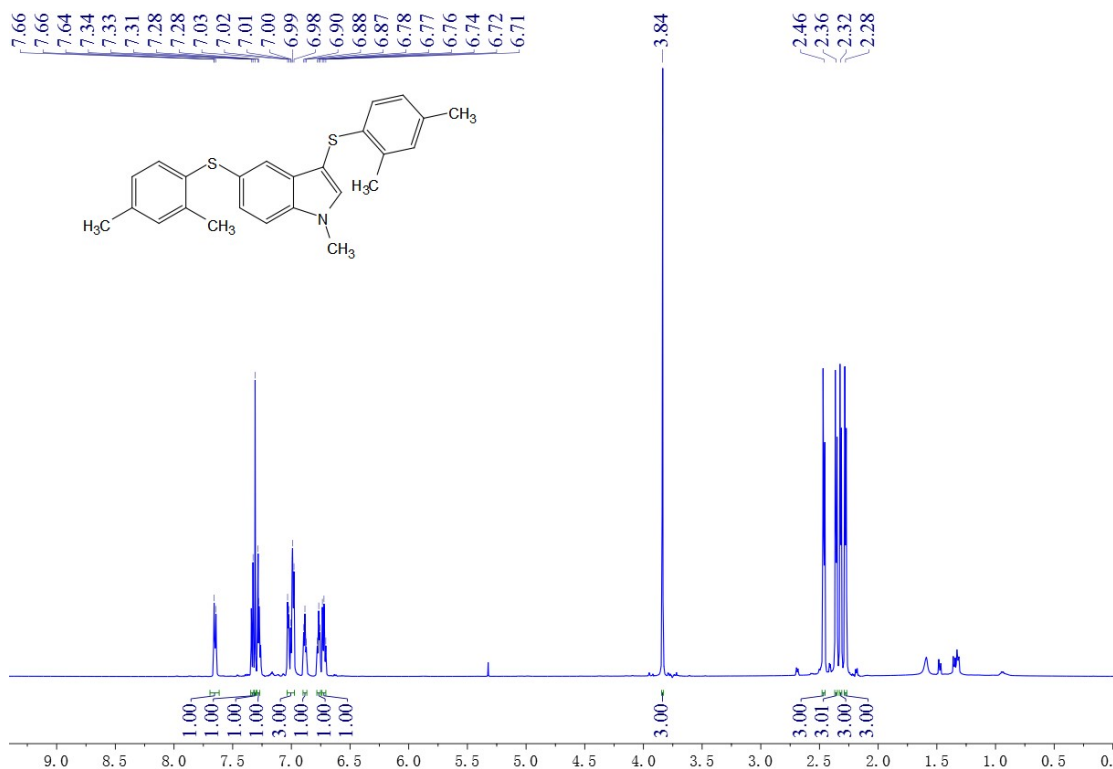

(69)  $^{13}\text{C}$ -NMR (151 MHz,  $\text{CDCl}_3$ ) spectrum of 3am

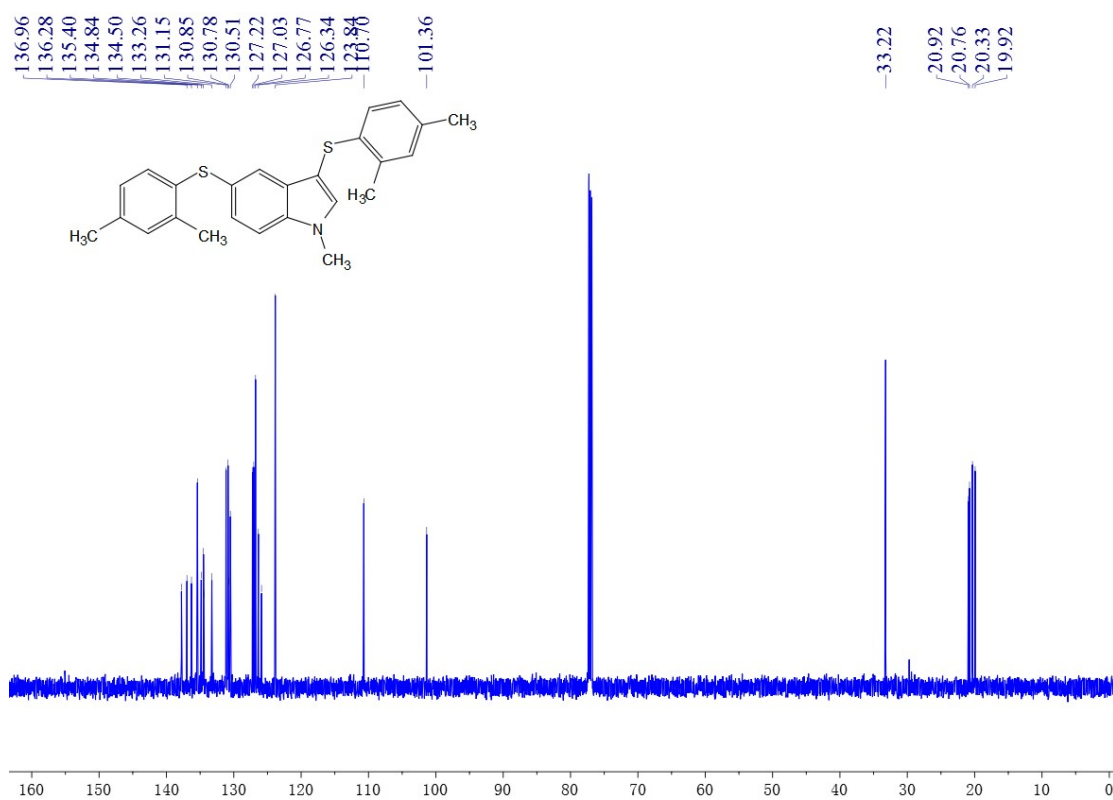

(70)  $^1\text{H}$ -NMR (600 MHz,  $\text{CDCl}_3$ ) spectrum of 3an

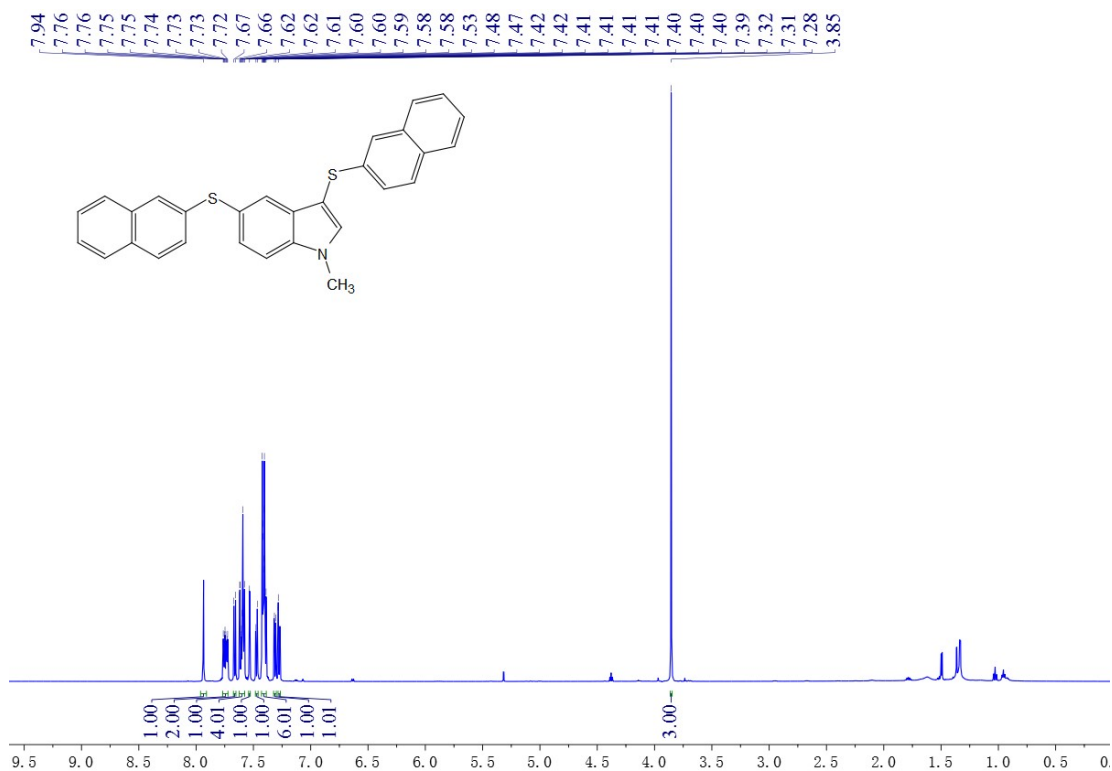

(71)  $^{13}\text{C}$ -NMR (151 MHz,  $\text{CDCl}_3$ ) spectrum of 3an

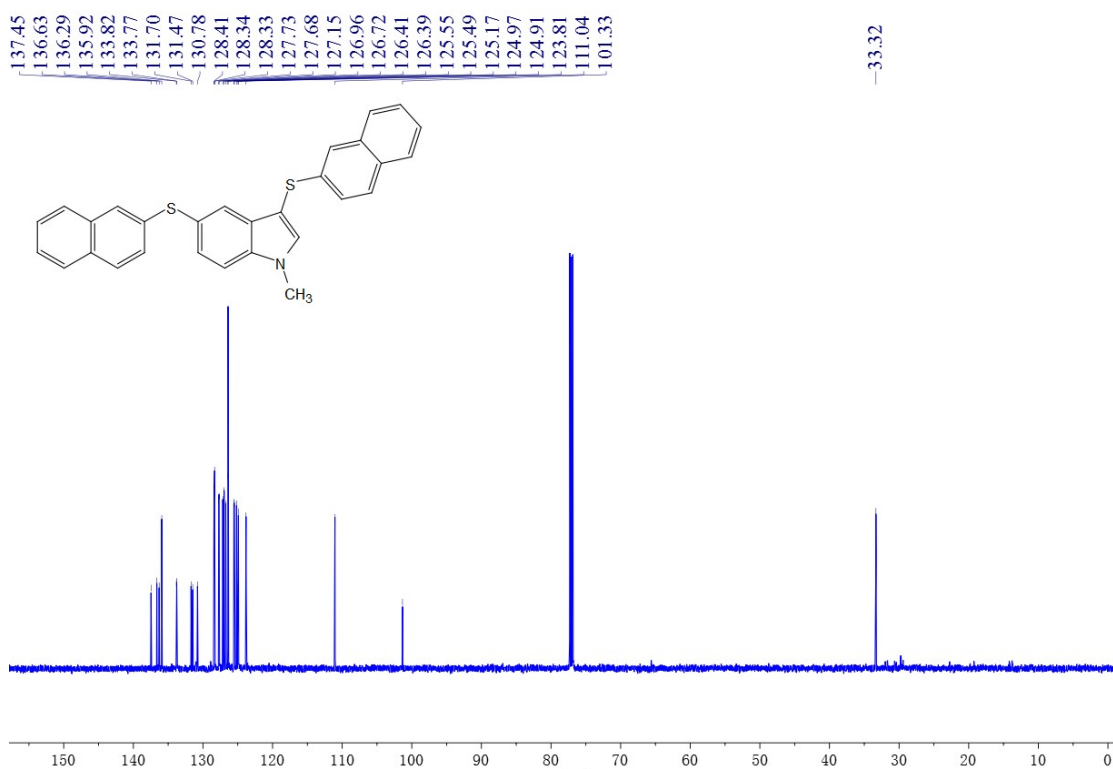

(72)  $^1\text{H}$ -NMR (600 MHz,  $\text{CDCl}_3$ ) spectrum of 3ao

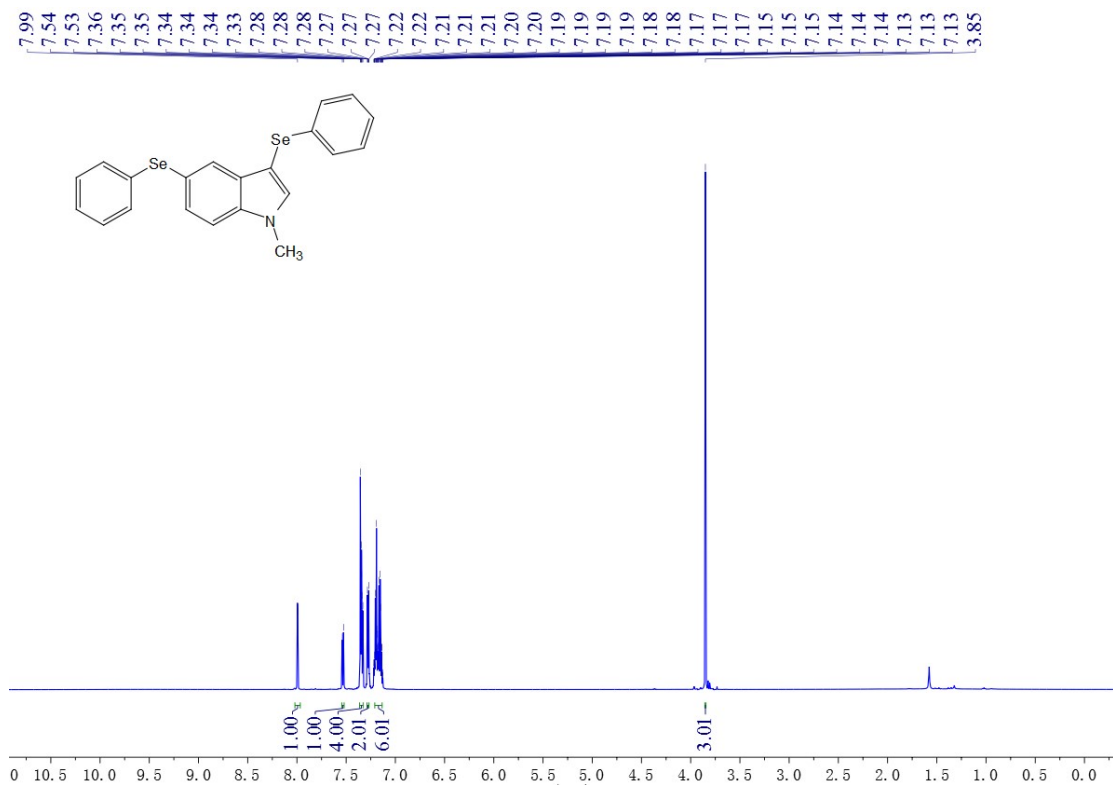



(73)  $^{13}\text{C}$ -NMR (151 MHz,  $\text{CDCl}_3$ ) spectrum of 3ao

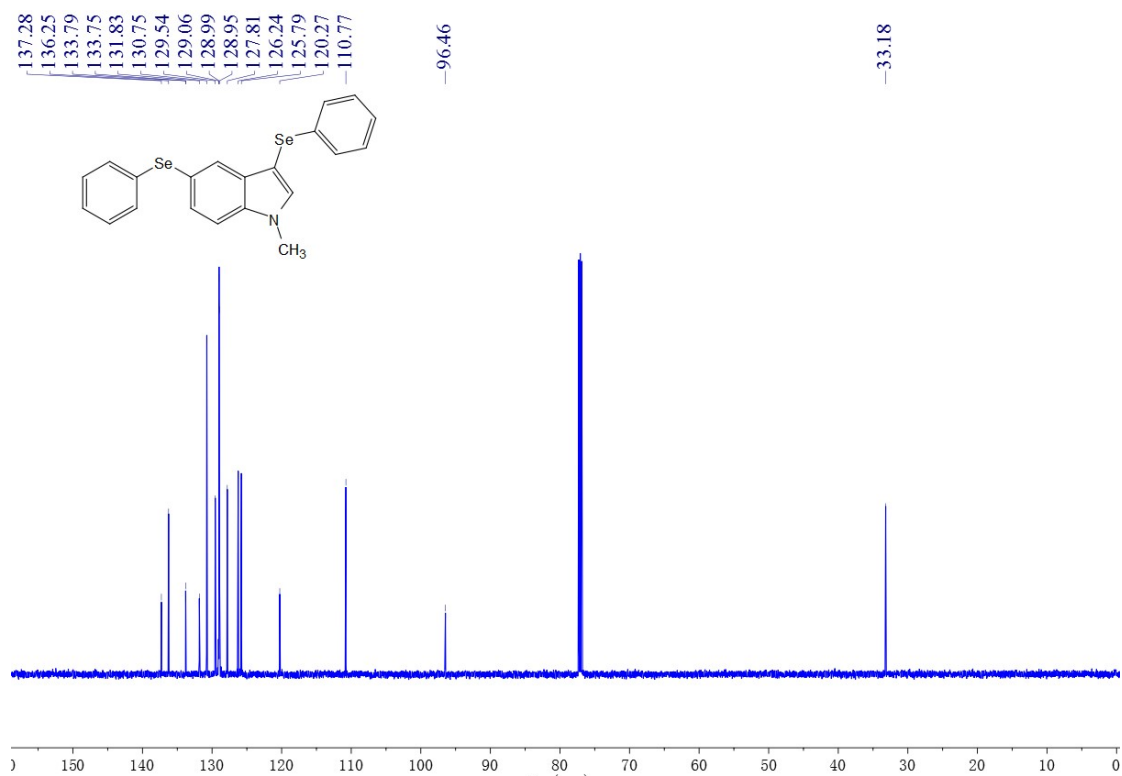

(74)  $^1\text{H}$ -NMR (600 MHz,  $\text{CDCl}_3$ ) spectrum of 3ap

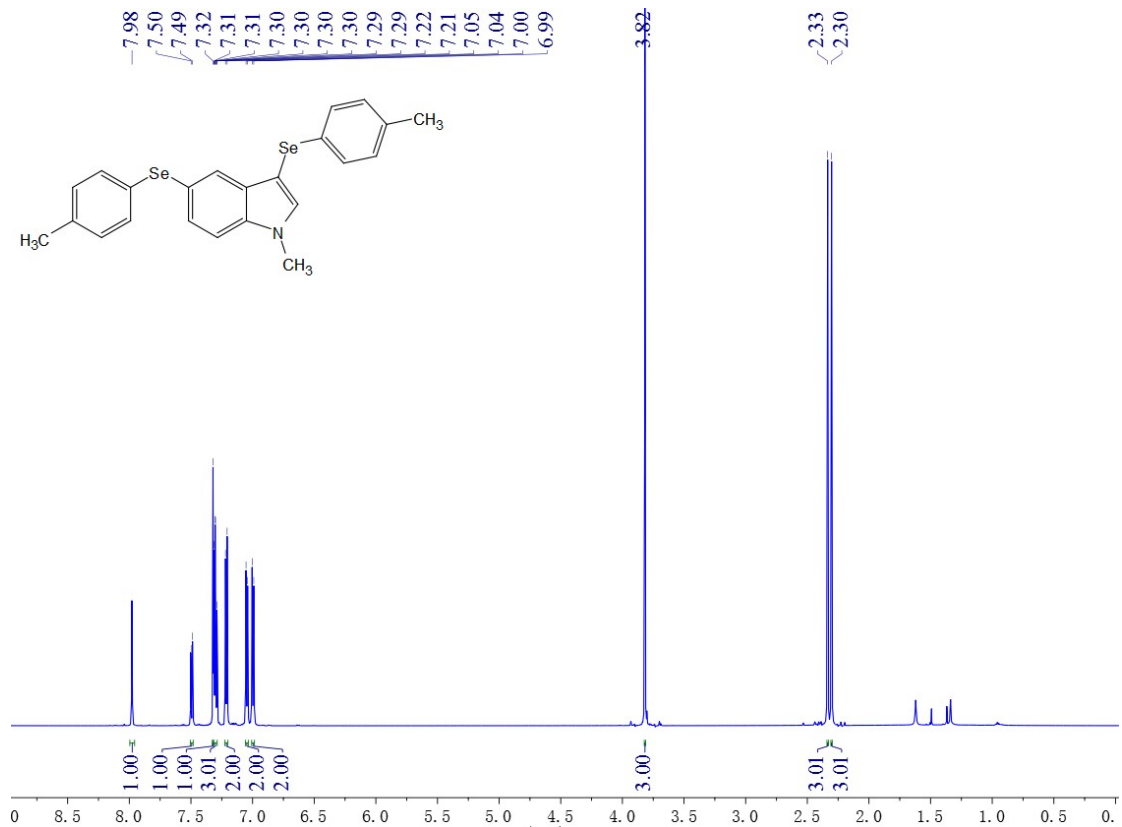

(75)  $^{13}\text{C}$ -NMR (151 MHz,  $\text{CDCl}_3$ ) spectrum of 3ap

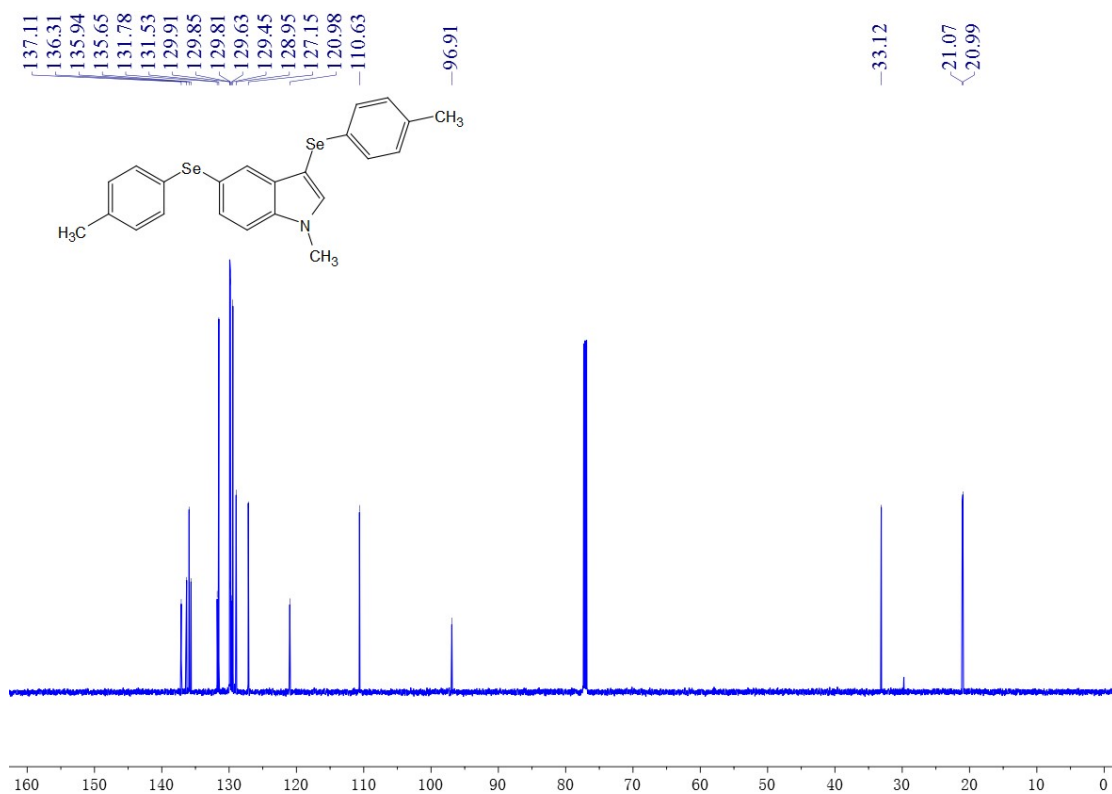

(76)  $^1\text{H}$ -NMR (400 MHz,  $\text{CDCl}_3$ ) spectrum of 3aq

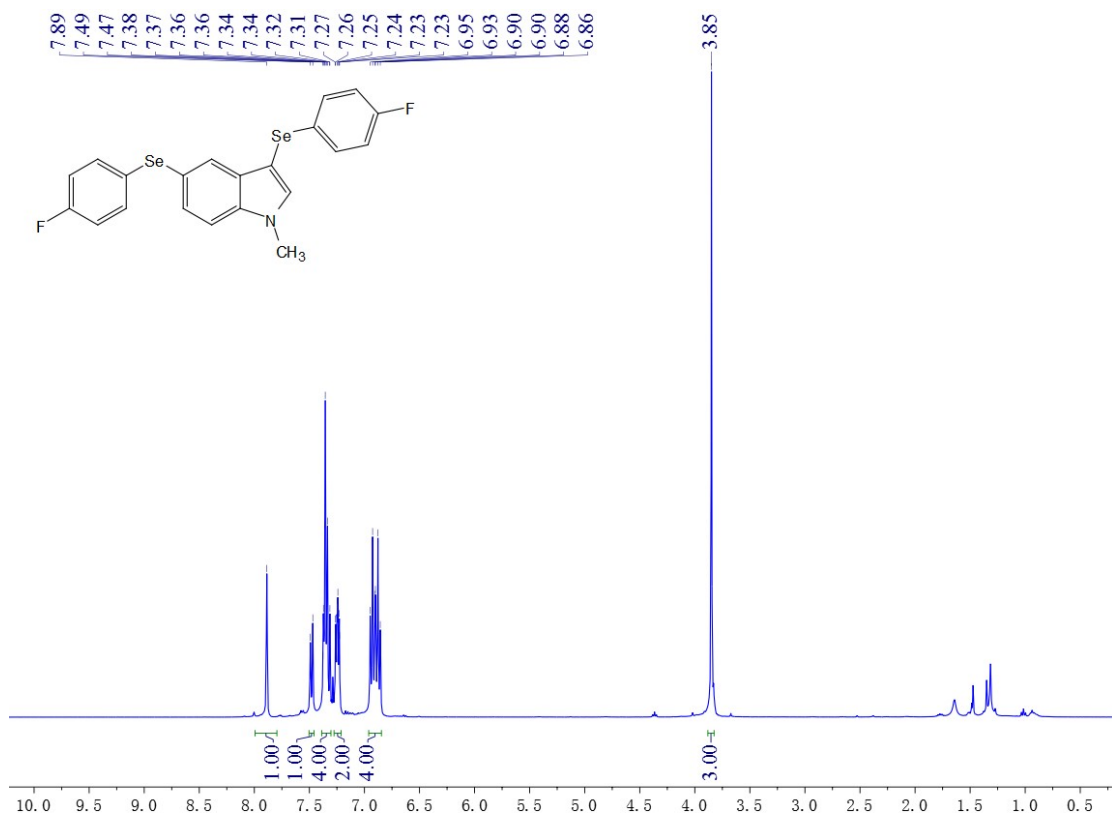

(77)  $^{13}\text{C}$ -NMR (101 MHz,  $\text{CDCl}_3$ ) spectrum of 3aq

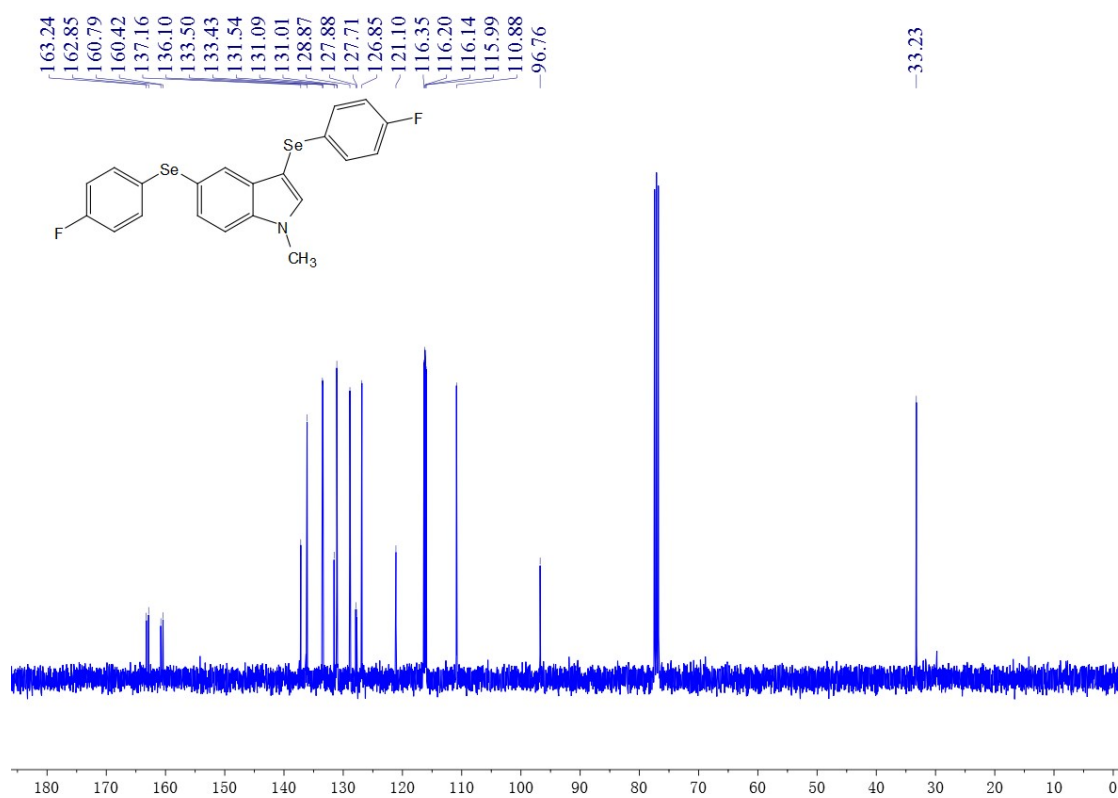

(78)  $^{19}\text{F}$ -NMR (376 MHz,  $\text{CDCl}_3$ ) spectrum of 3aq

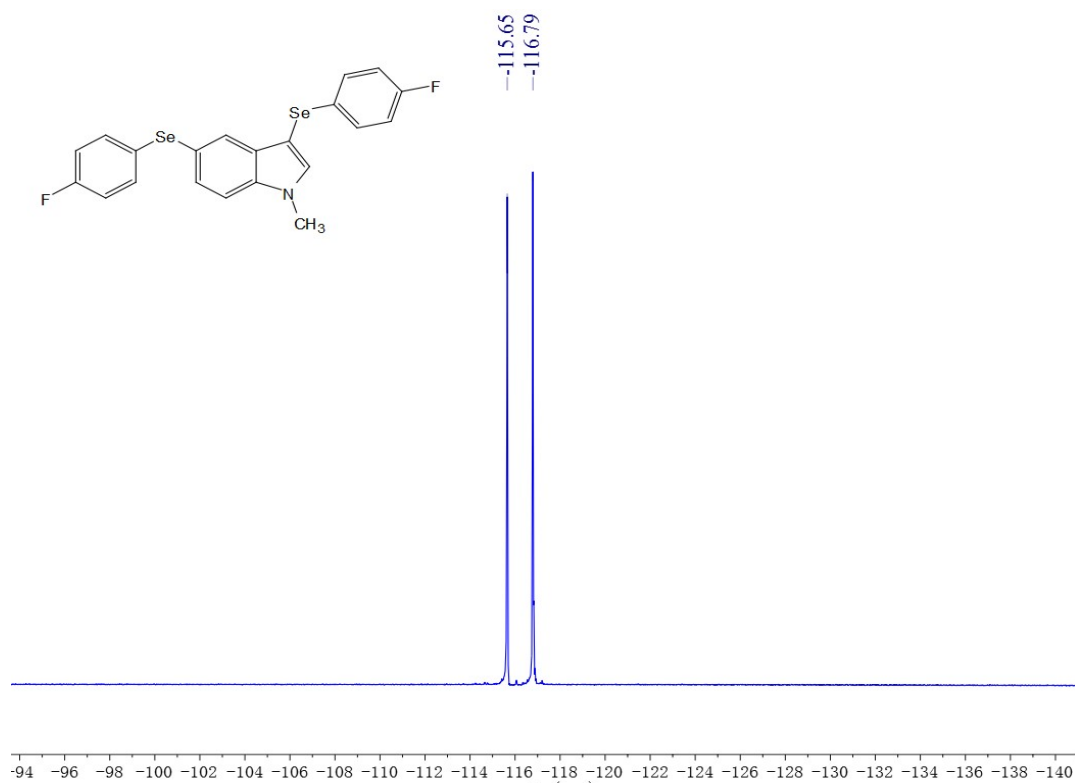

(79)  $^1\text{H-NMR}$  (600 MHz,  $\text{CDCl}_3$ ) spectrum of 3ar

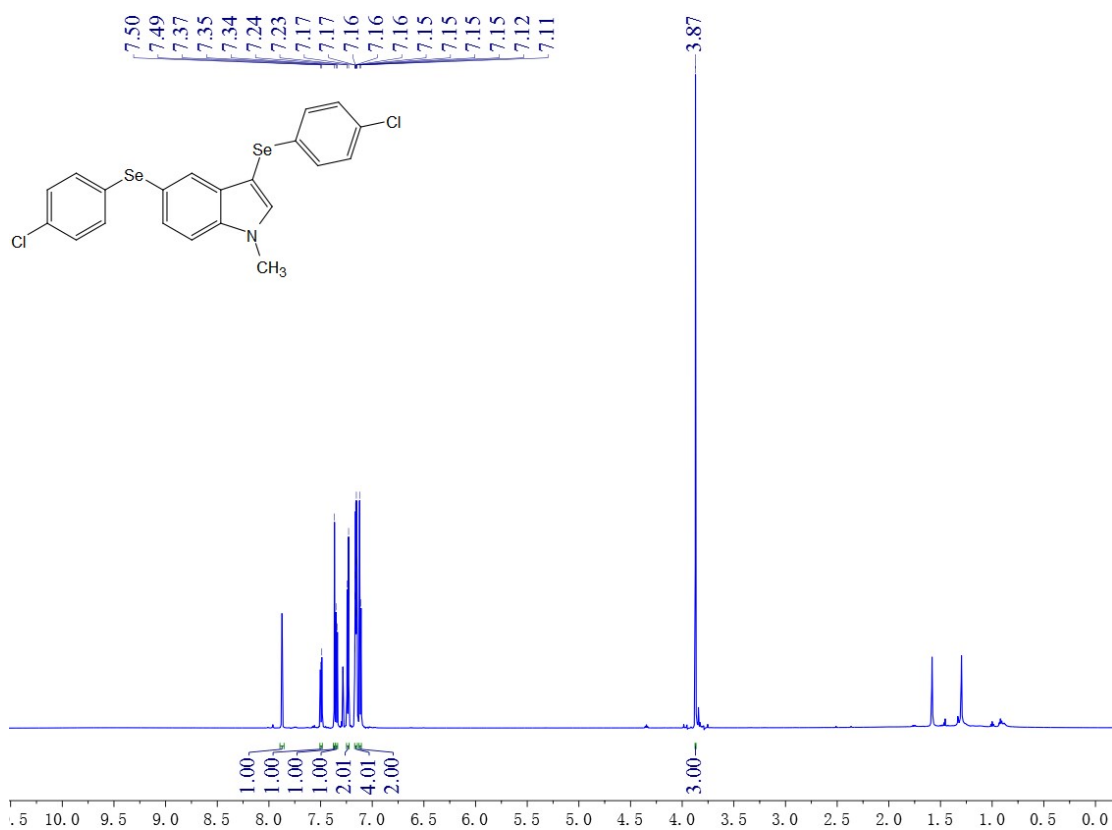

(80)  $^{13}\text{C-NMR}$  (151 MHz,  $\text{CDCl}_3$ ) spectrum of 3ar

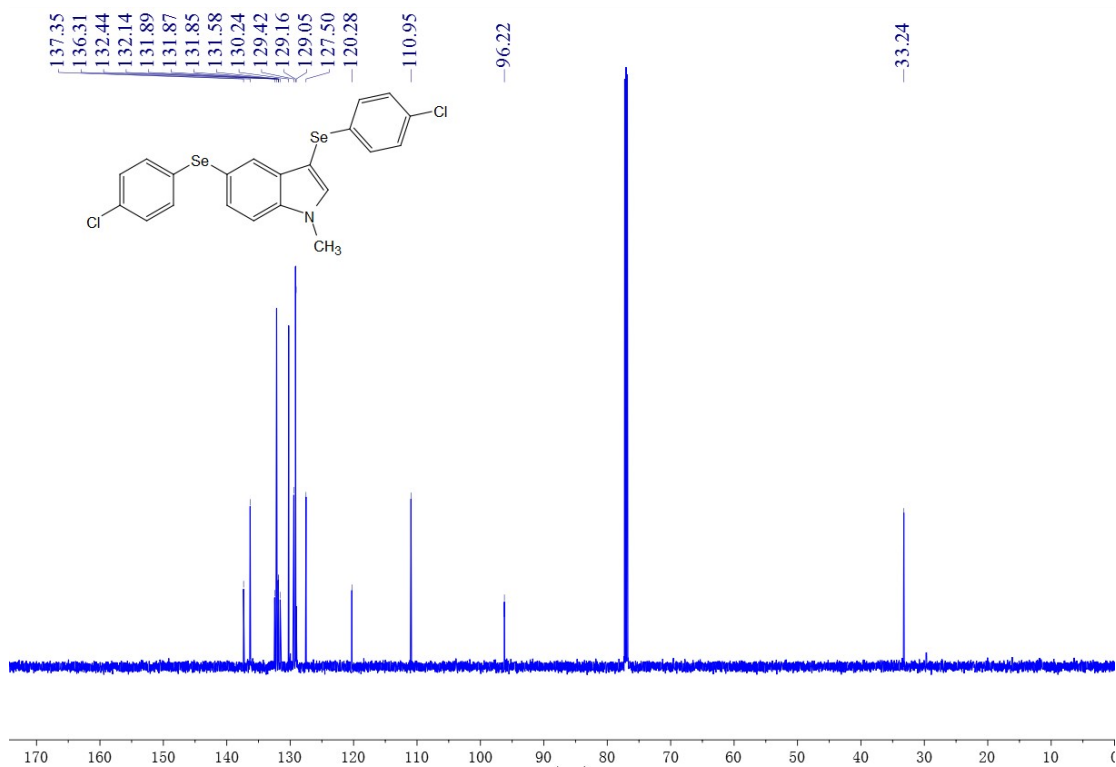

(81)  $^1\text{H-NMR}$  (600 MHz,  $\text{CDCl}_3$ ) spectrum of 3as

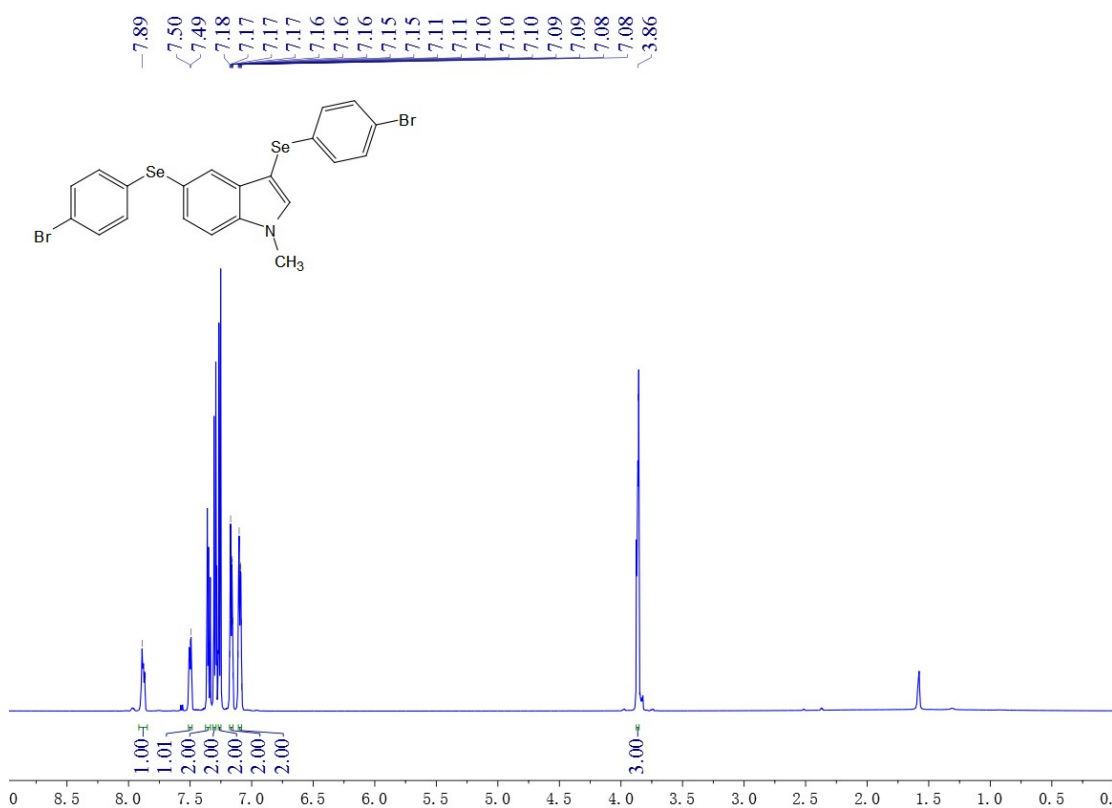

(82)  $^{13}\text{C-NMR}$  (151 MHz,  $\text{CDCl}_3$ ) spectrum of 3as

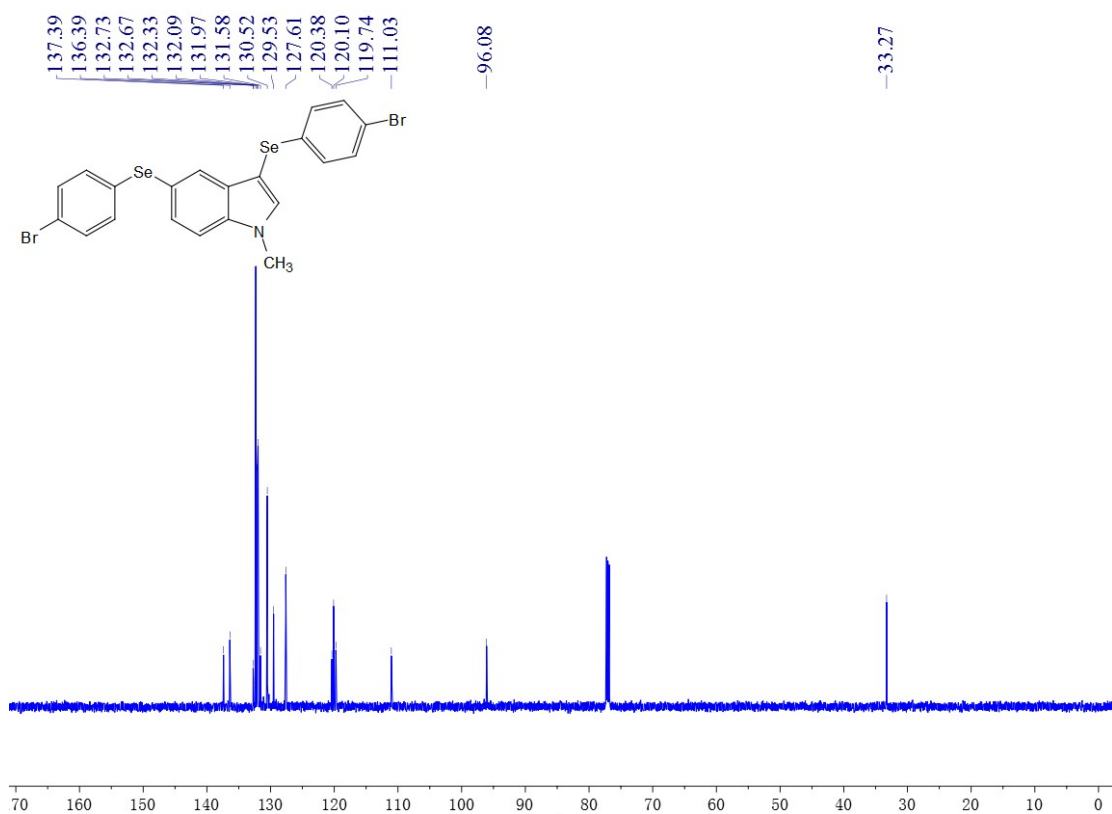

**(83)  $^1\text{H-NMR}$  (600 MHz,  $\text{CDCl}_3$ ) spectrum of 3at**

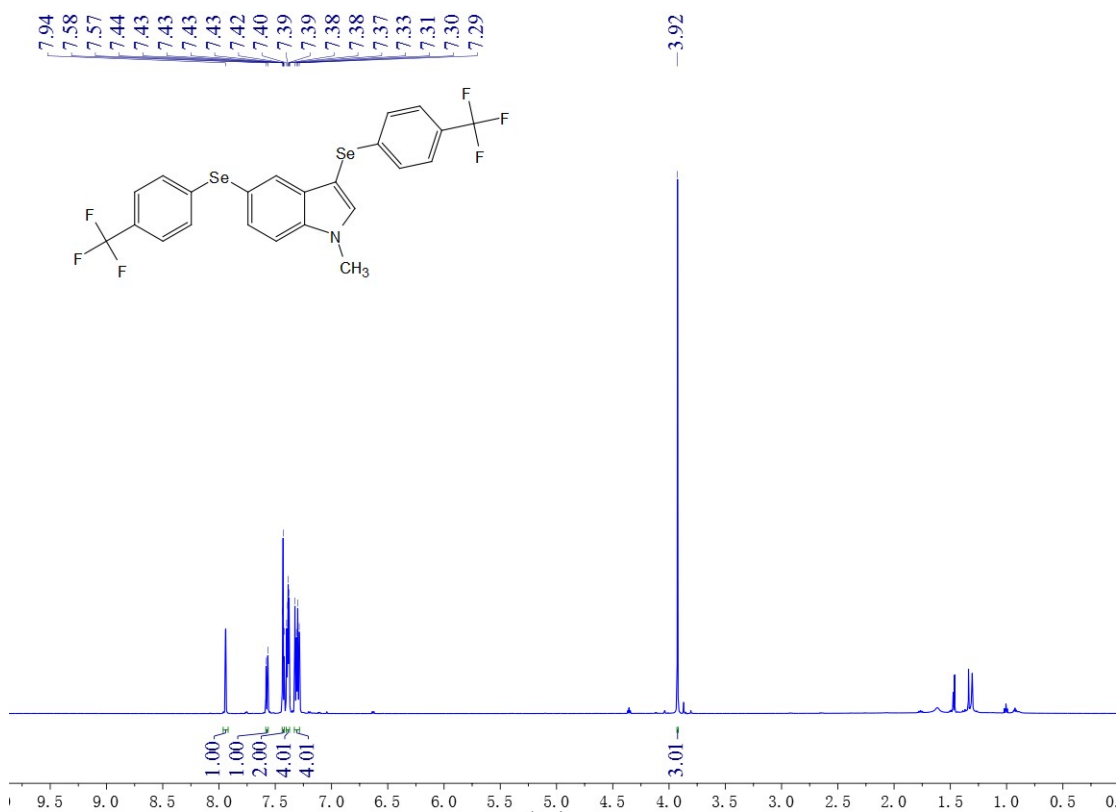

**(84)  $^{13}\text{C-NMR}$  (151 MHz,  $\text{CDCl}_3$ ) spectrum of 3at**

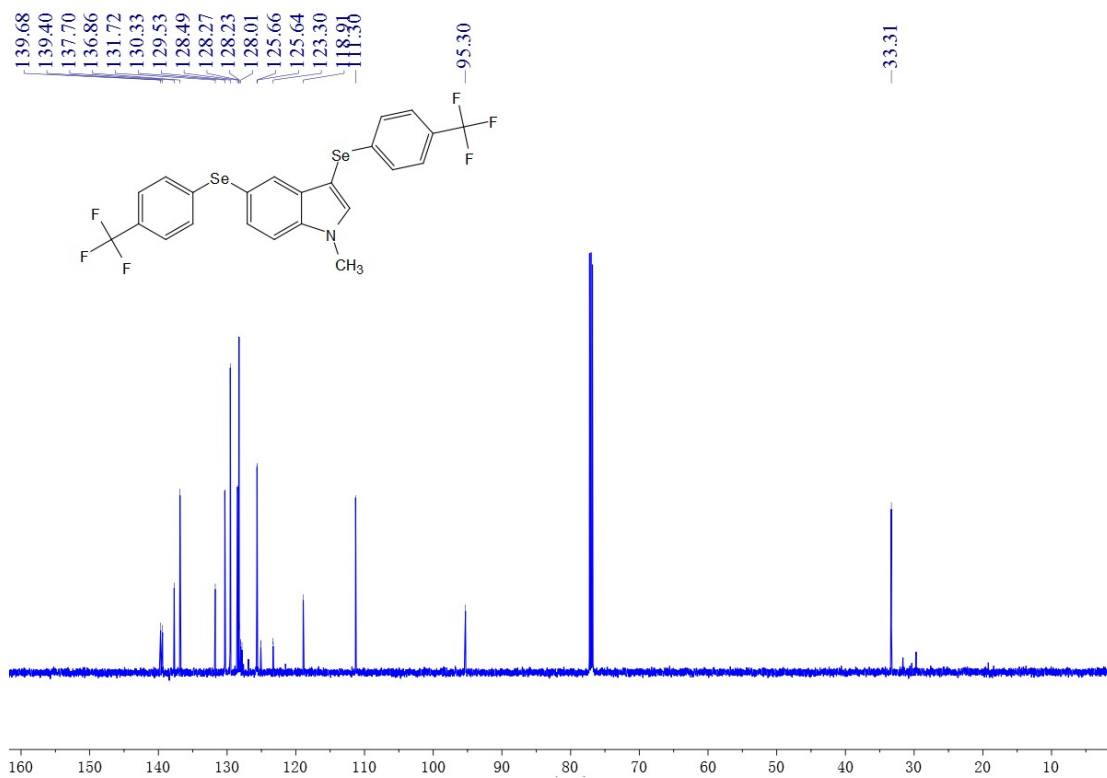

**(85)  $^{19}\text{F}$ -NMR (565 MHz,  $\text{CDCl}_3$ ) spectrum of 3at**

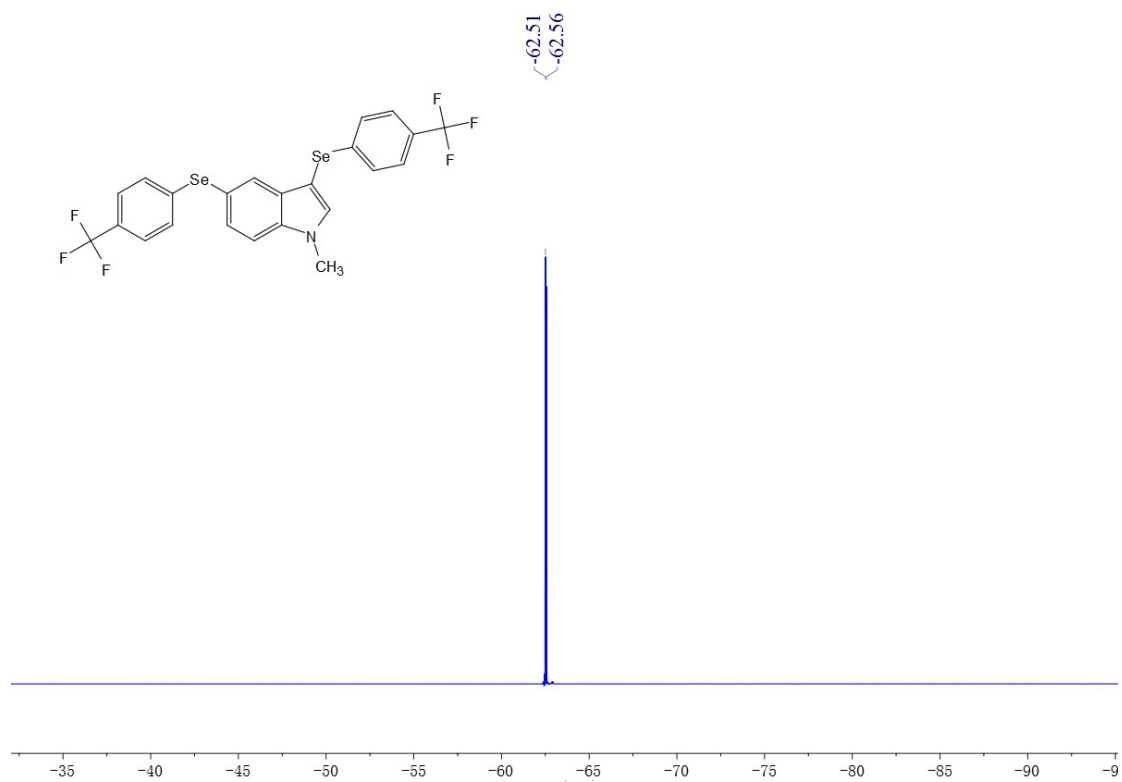

**(86)  $^1\text{H}$ -NMR (500 MHz,  $\text{CDCl}_3$ ) spectrum of 4aa**

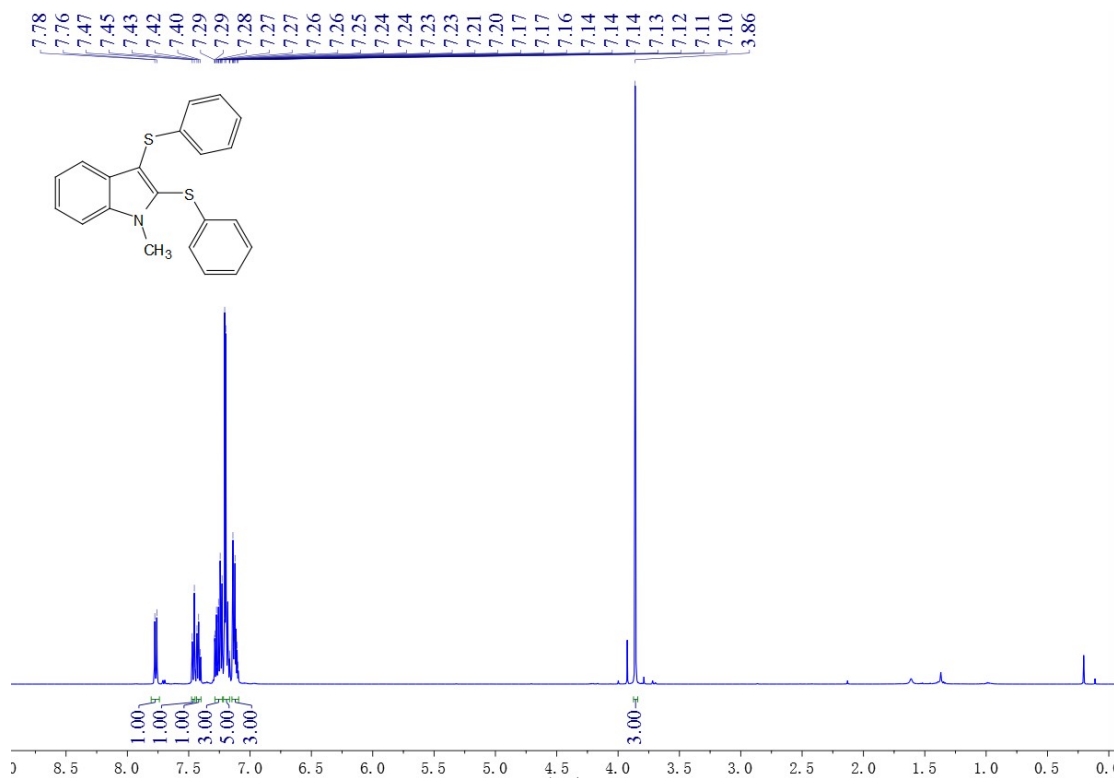

(87)  $^{13}\text{C}$ -NMR (126 MHz,  $\text{CDCl}_3$ ) spectrum of 4aa

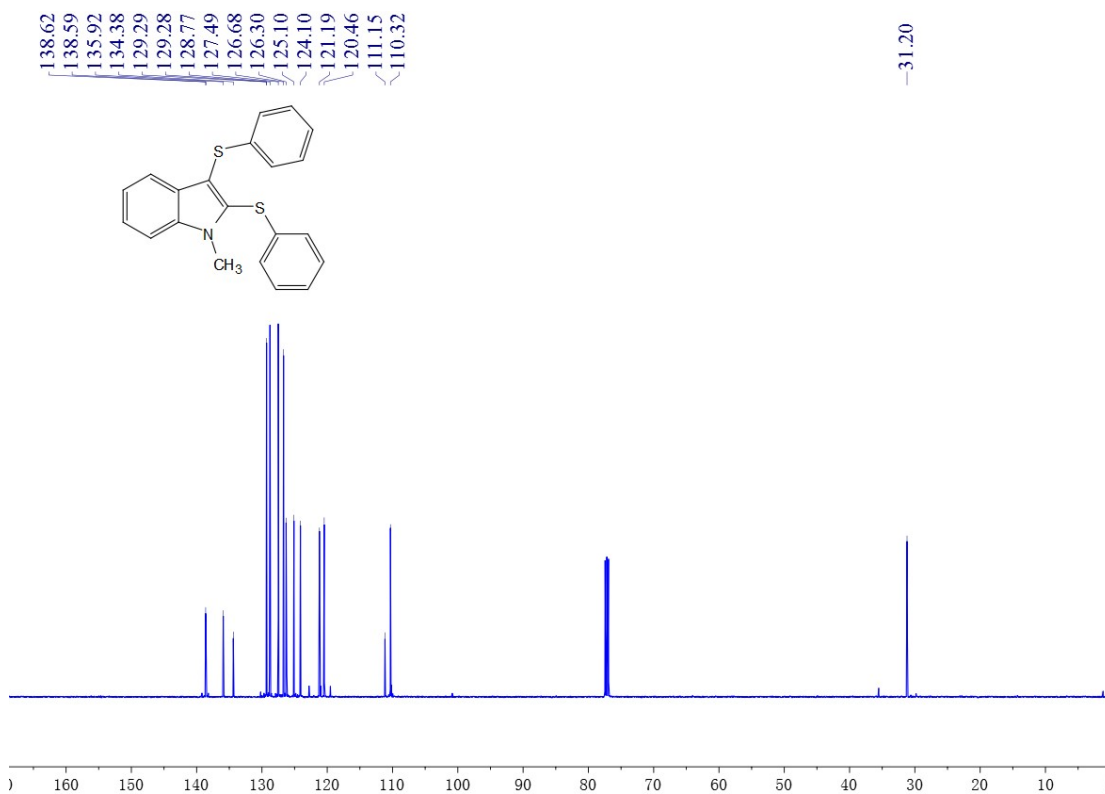

(88)  $^1\text{H}$ -NMR (500 MHz,  $\text{CDCl}_3$ ) spectrum of 4ba

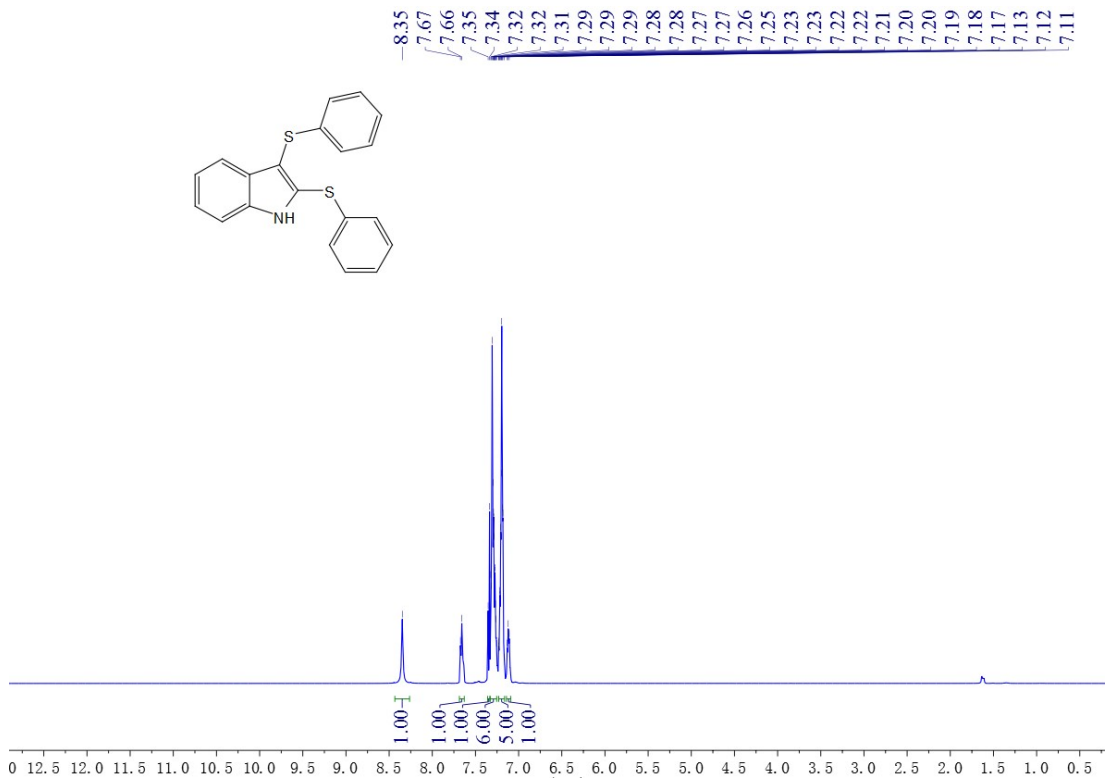



(89)  $^{13}\text{C}$ -NMR (126 MHz,  $\text{CDCl}_3$ ) spectrum of 4ba

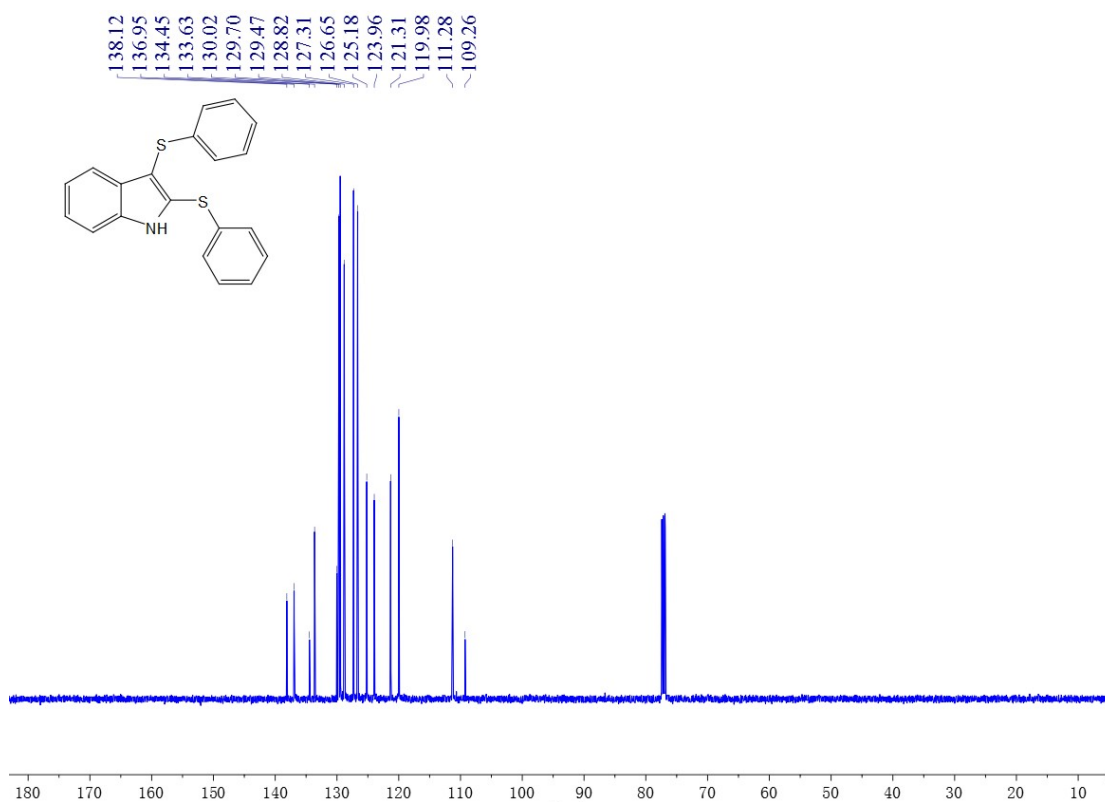

(90)  $^1\text{H}$ -NMR (500 MHz,  $\text{CDCl}_3$ ) spectrum of 4ca

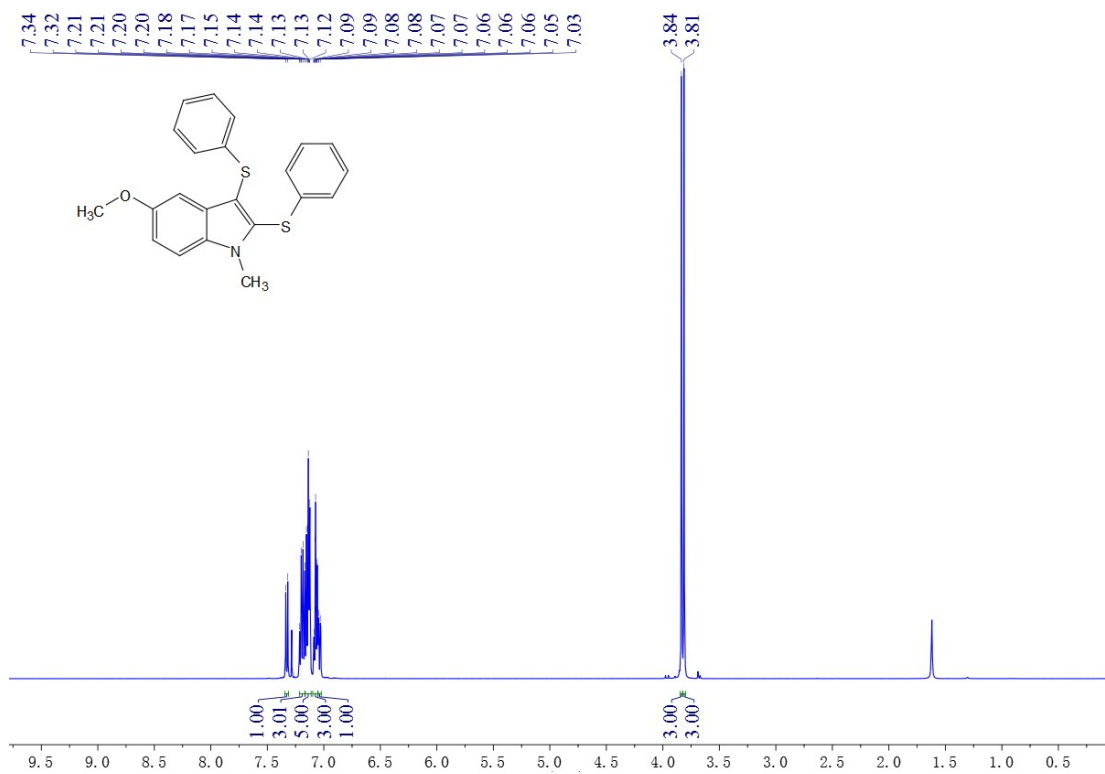

(91)  $^{13}\text{C}$ -NMR (126 MHz,  $\text{CDCl}_3$ ) spectrum of 4ca

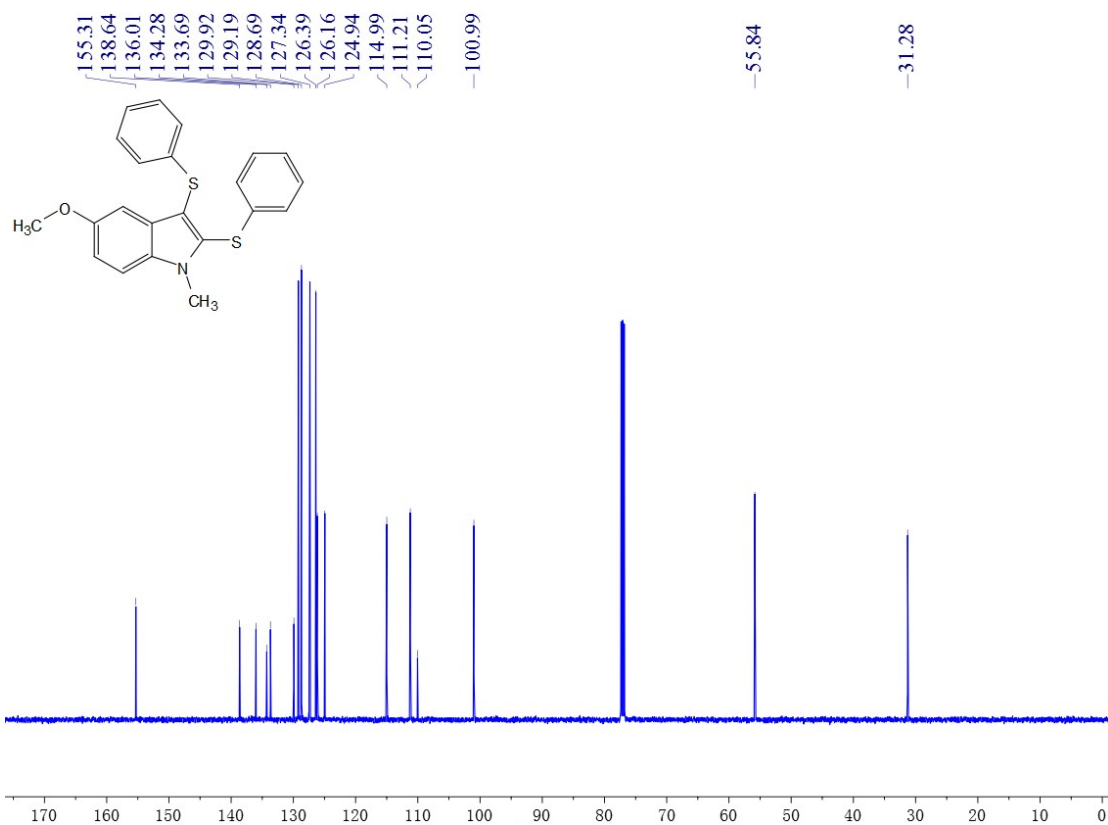

(92)  $^1\text{H}$ -NMR (500 MHz,  $\text{CDCl}_3$ ) spectrum of 4da

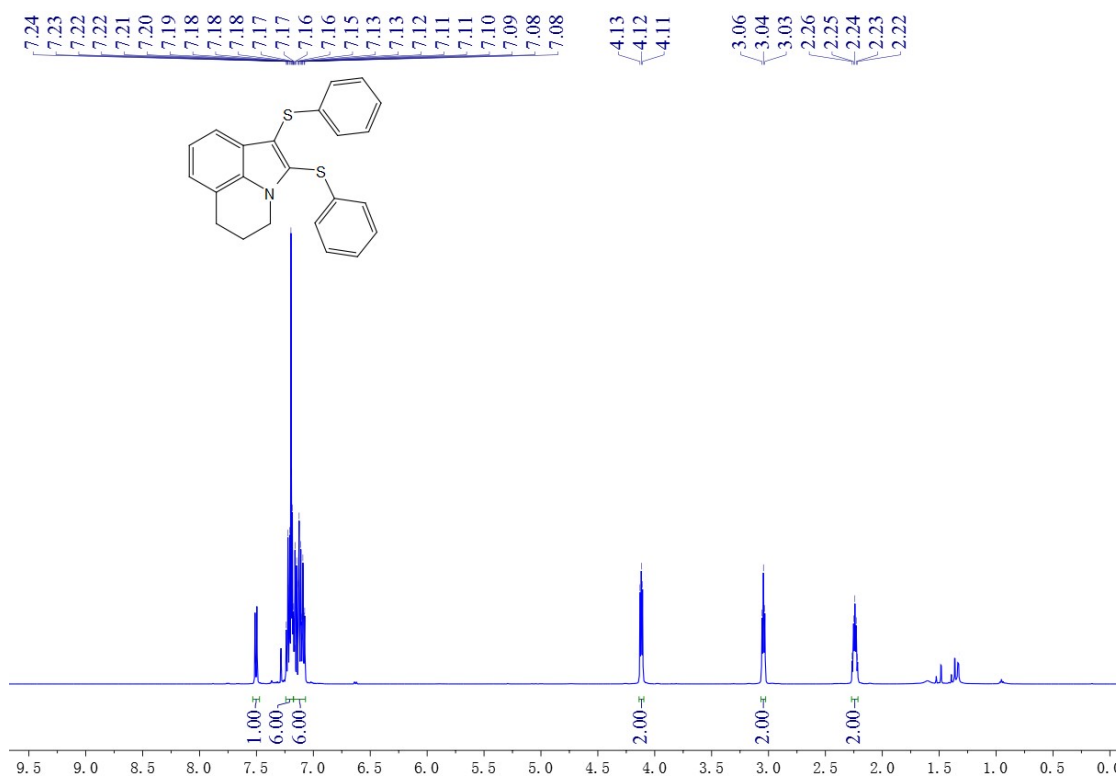

(93)  $^{13}\text{C}$ -NMR (126 MHz,  $\text{CDCl}_3$ ) spectrum of 4da

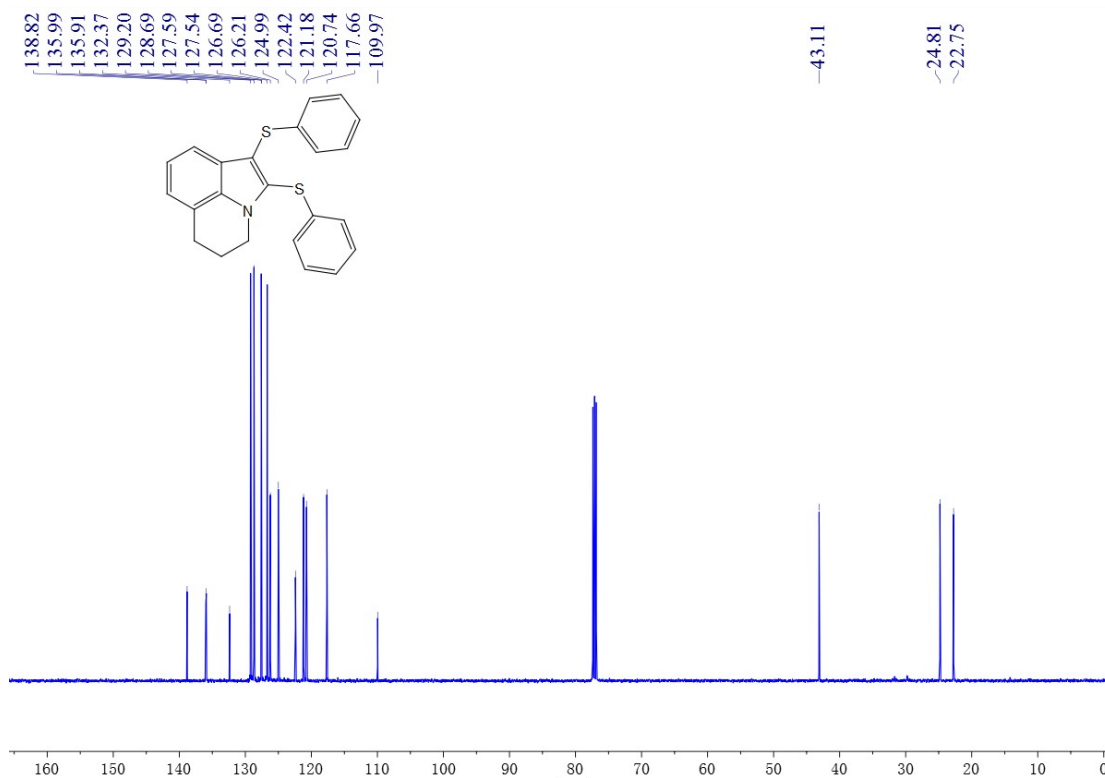

(94)  $^1\text{H}$ -NMR (500 MHz,  $\text{CDCl}_3$ ) spectrum of 4ea

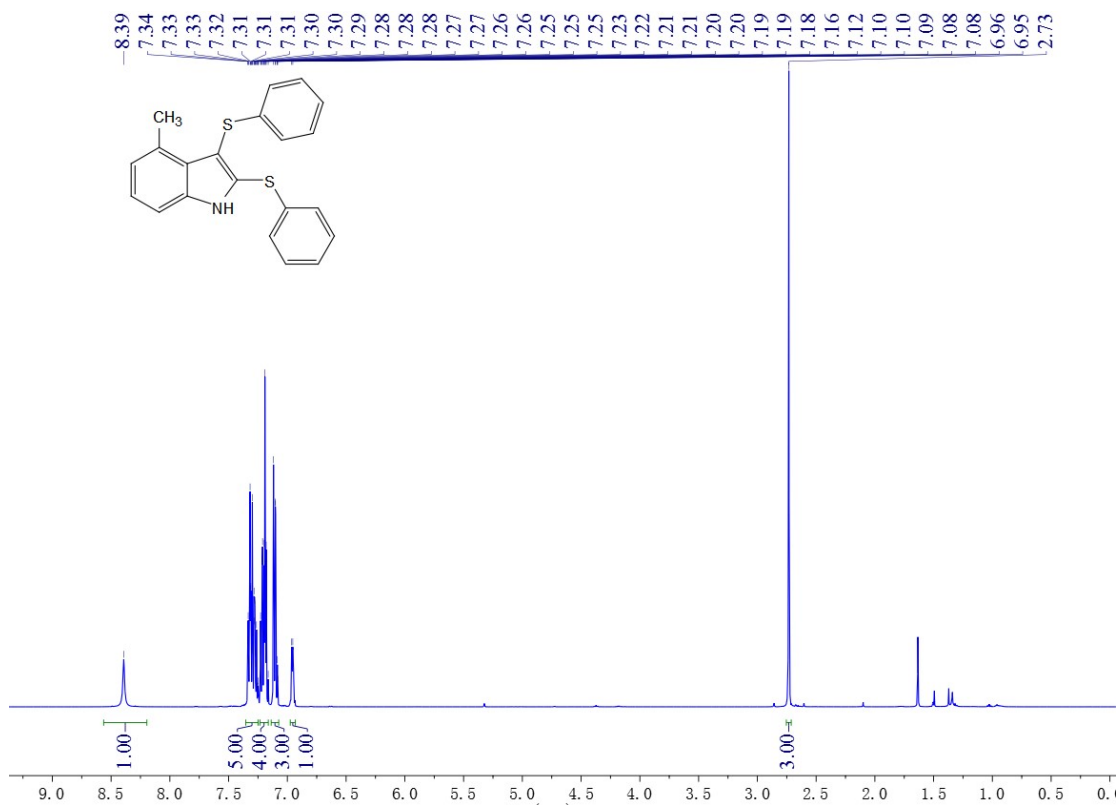

(95)  $^{13}\text{C}$ -NMR (126 MHz,  $\text{CDCl}_3$ ) spectrum of 4ea

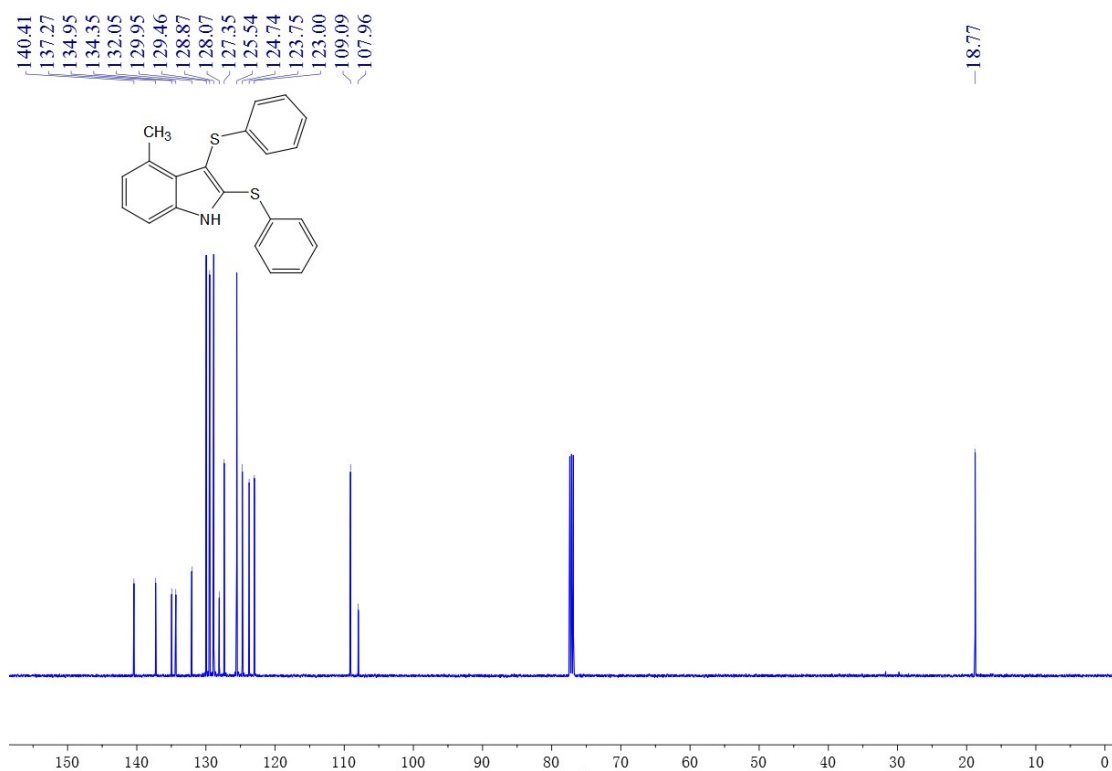

(96)  $^1\text{H}$ -NMR (500 MHz,  $\text{CDCl}_3$ ) spectrum of 4fa

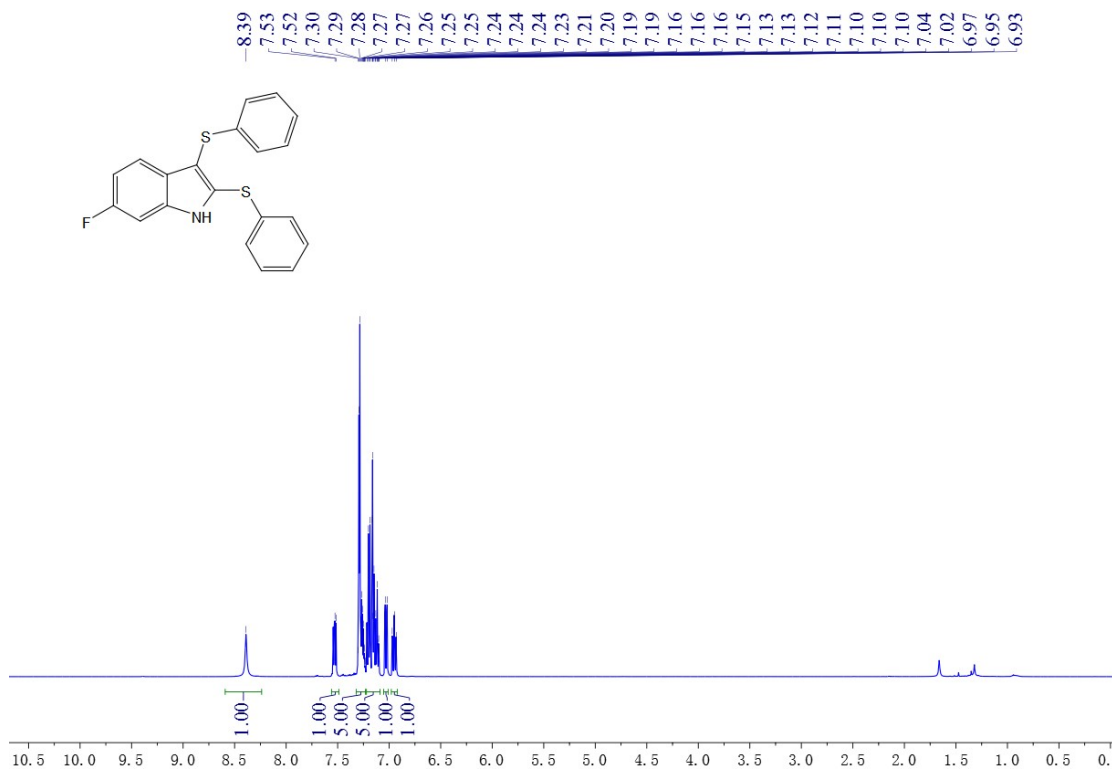

(97)  $^{13}\text{C}$ -NMR (126 MHz,  $\text{CDCl}_3$ ) spectrum of 4fa

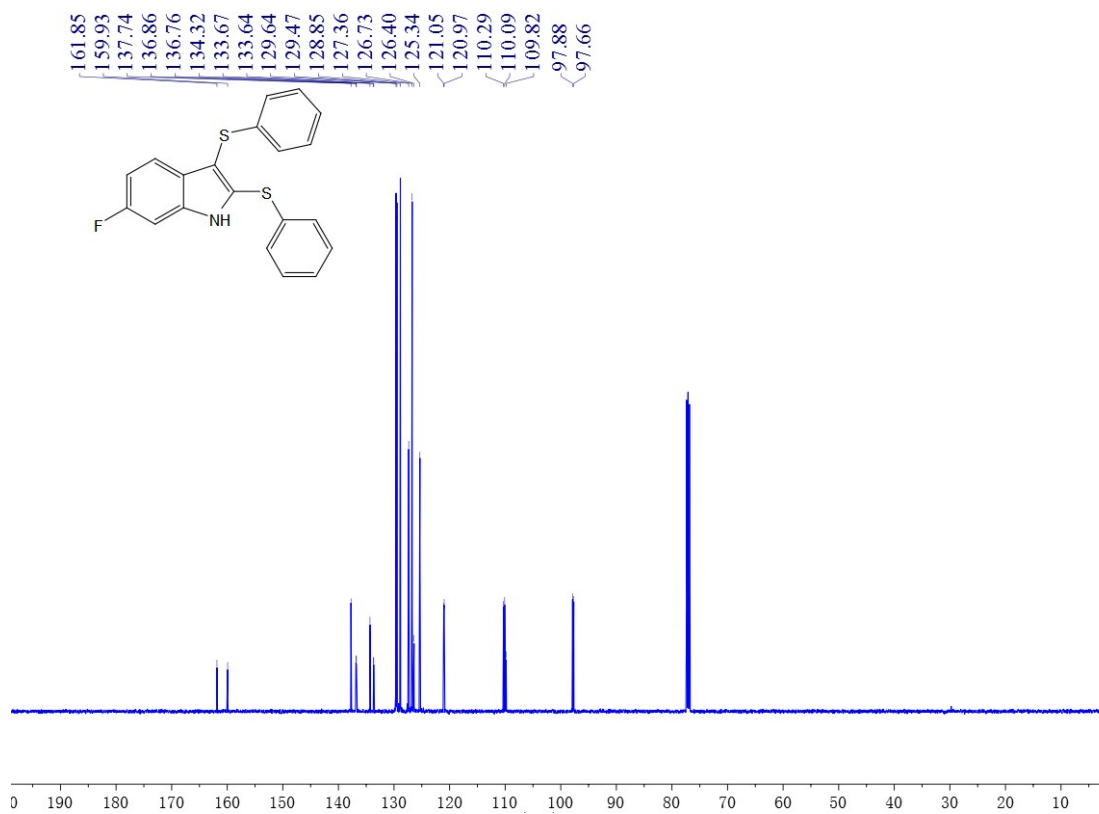

(98)  $^{19}\text{F}$ -NMR (471 MHz,  $\text{CDCl}_3$ ) spectrum of 4fa

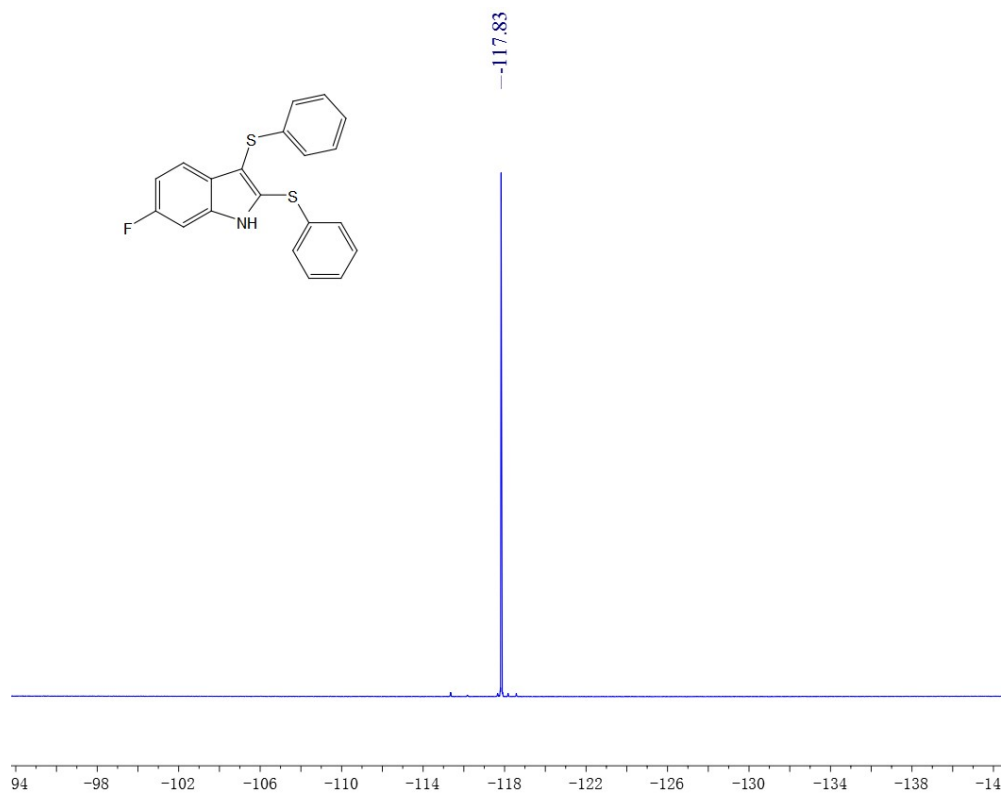

**(99)  $^1\text{H-NMR}$  (500 MHz,  $\text{CDCl}_3$ ) spectrum of 4ga**

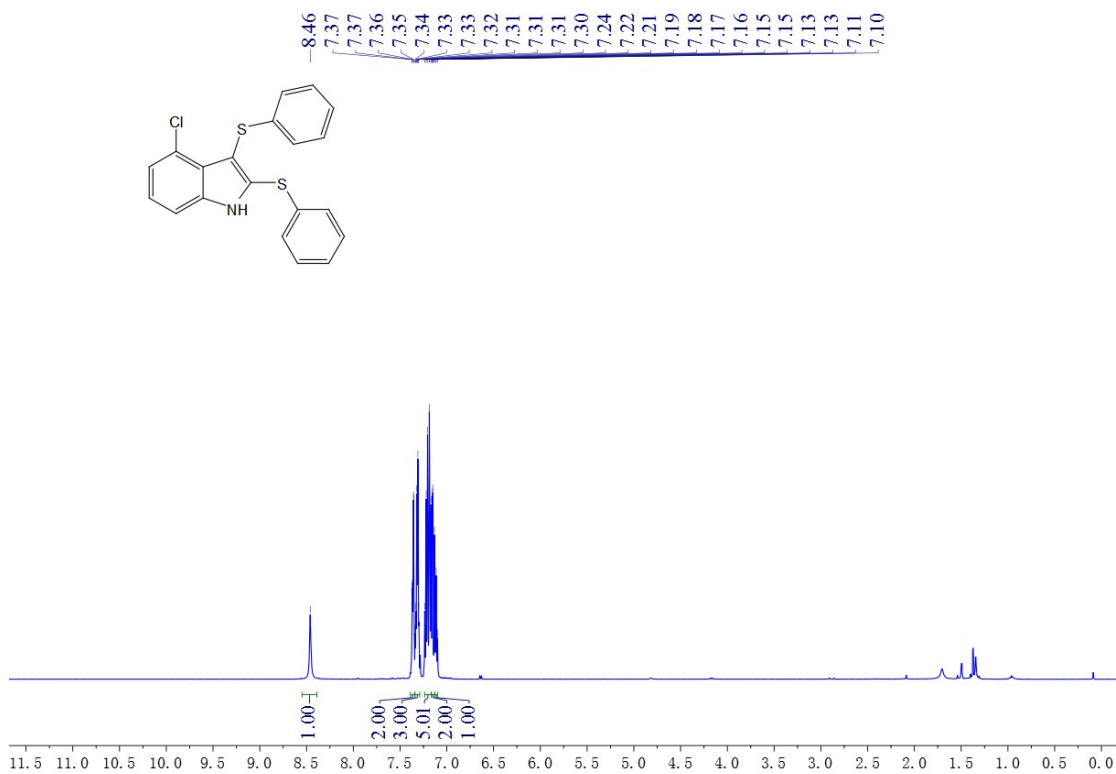

**(100)  $^{13}\text{C-NMR}$  (126 MHz,  $\text{CDCl}_3$ ) spectrum of 4ga**

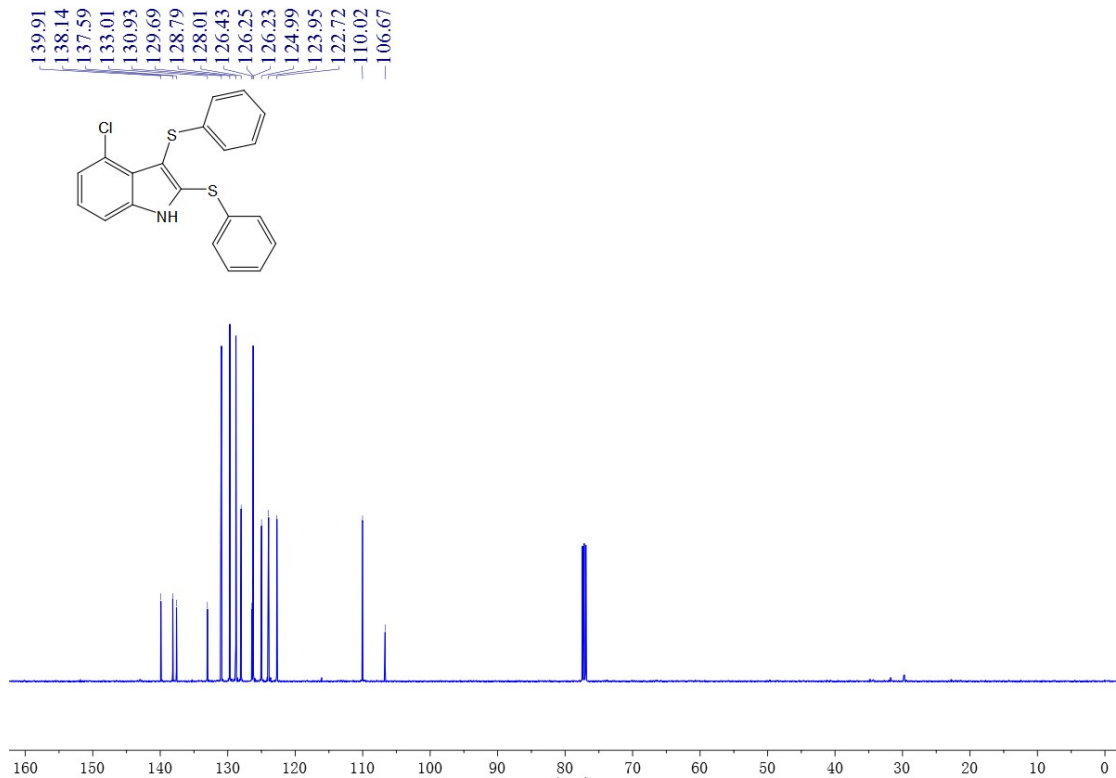

(101)  $^1\text{H-NMR}$  (500 MHz,  $\text{CDCl}_3$ ) spectrum of 4ha

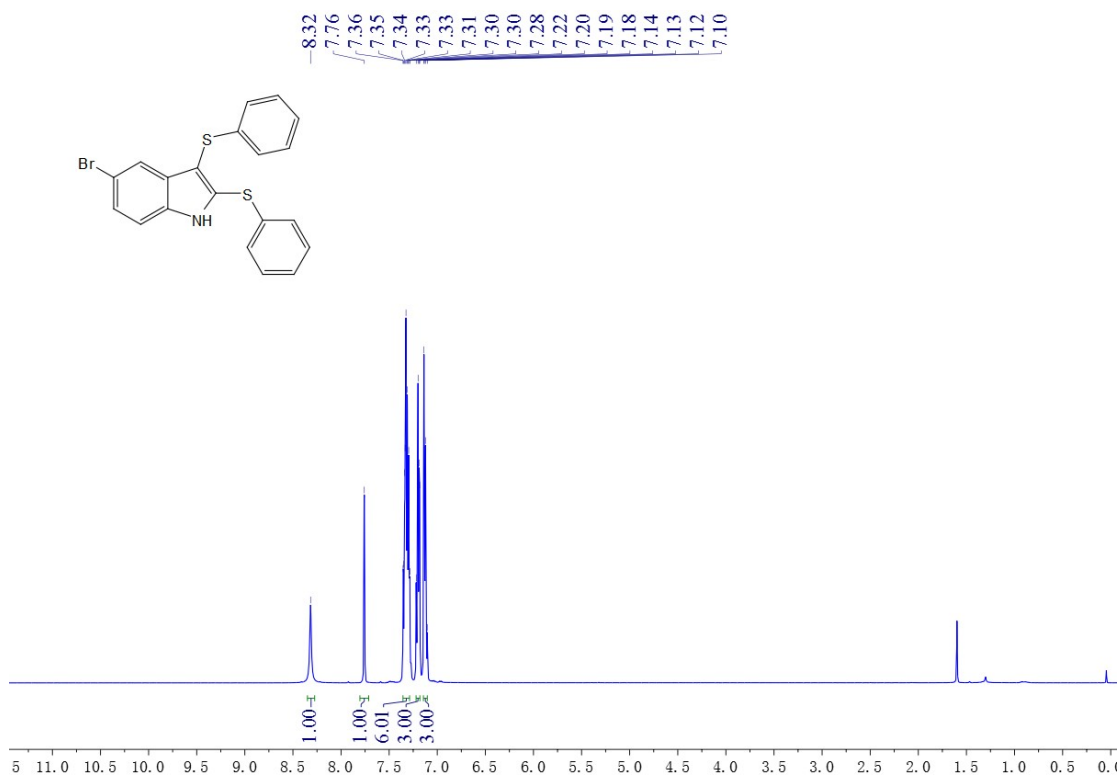

(102)  $^{13}\text{C-NMR}$  (126 MHz,  $\text{CDCl}_3$ ) spectrum of 4ha

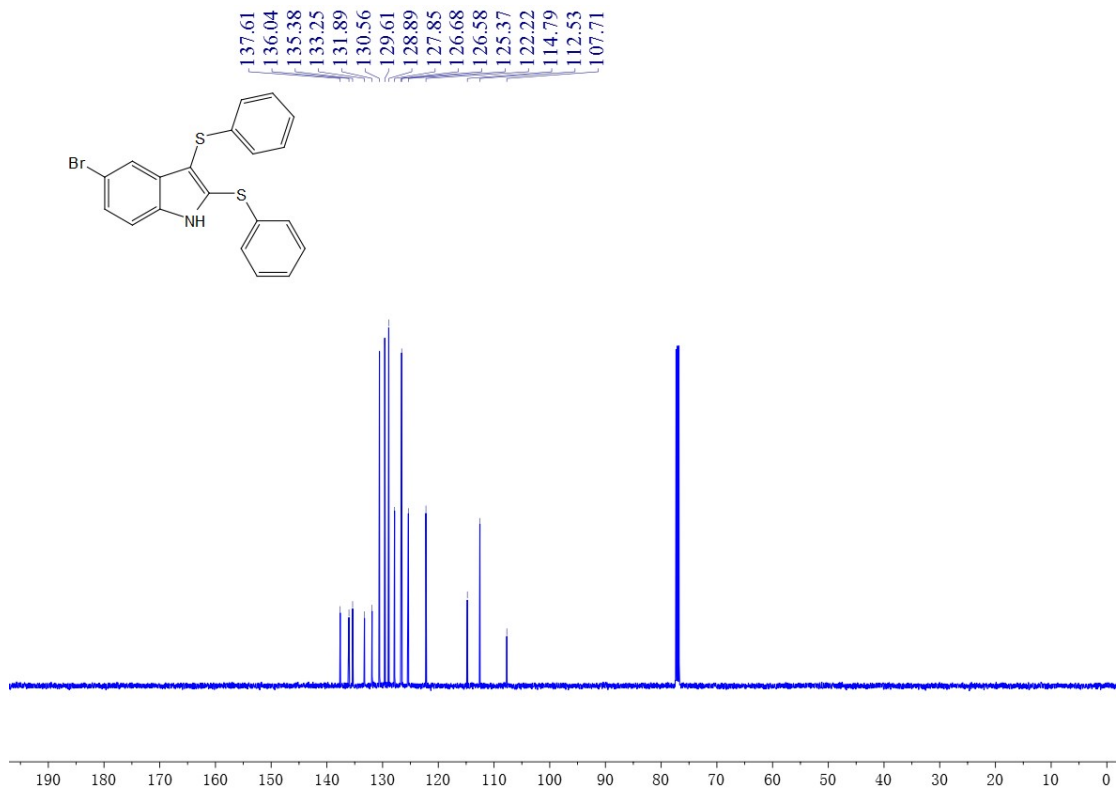

(103) <sup>1</sup>H-NMR (500 MHz, CDCl<sub>3</sub>) spectrum of 4ia

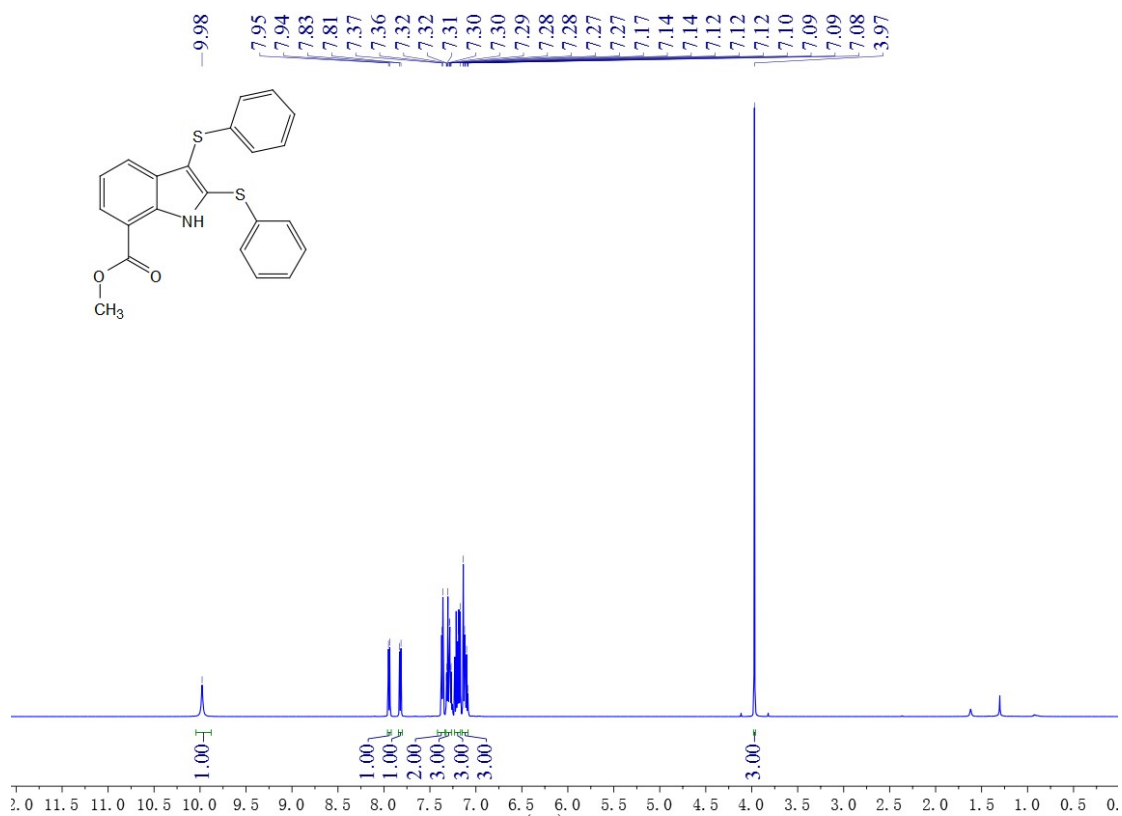

(104) <sup>13</sup>C-NMR (126 MHz, CDCl<sub>3</sub>) spectrum of 4ia

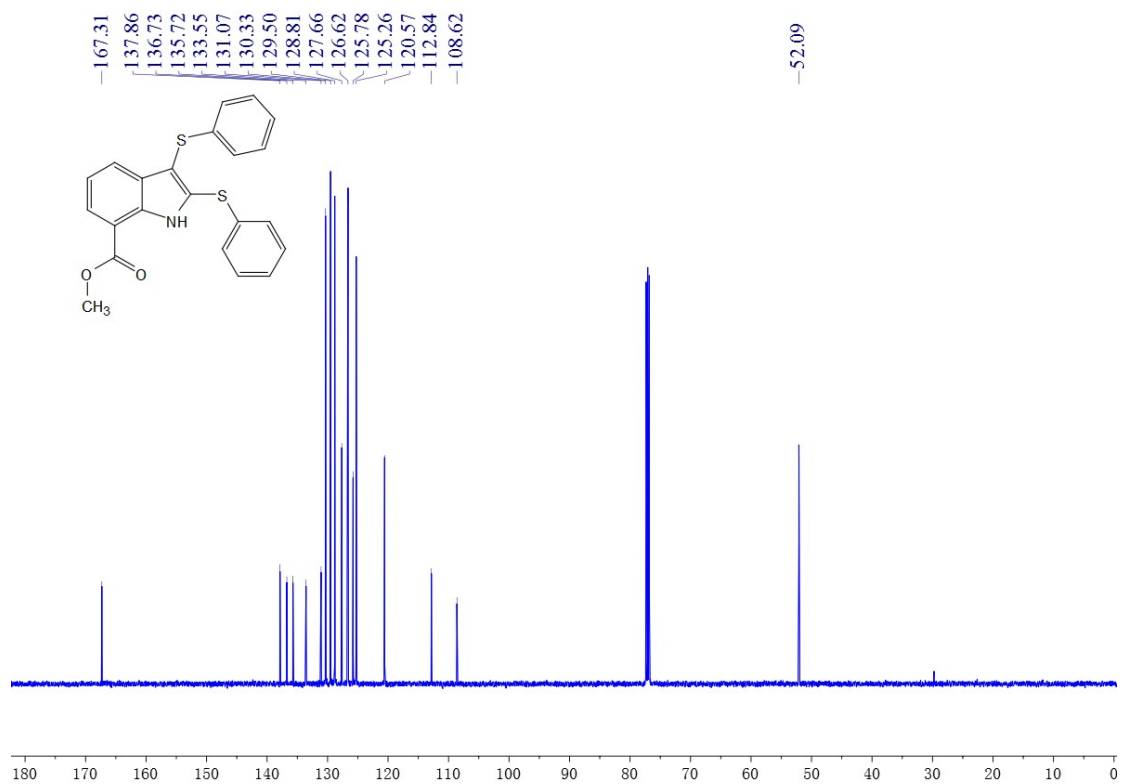



(105)  $^1\text{H-NMR}$  (500 MHz,  $\text{CDCl}_3$ ) spectrum of 4ja

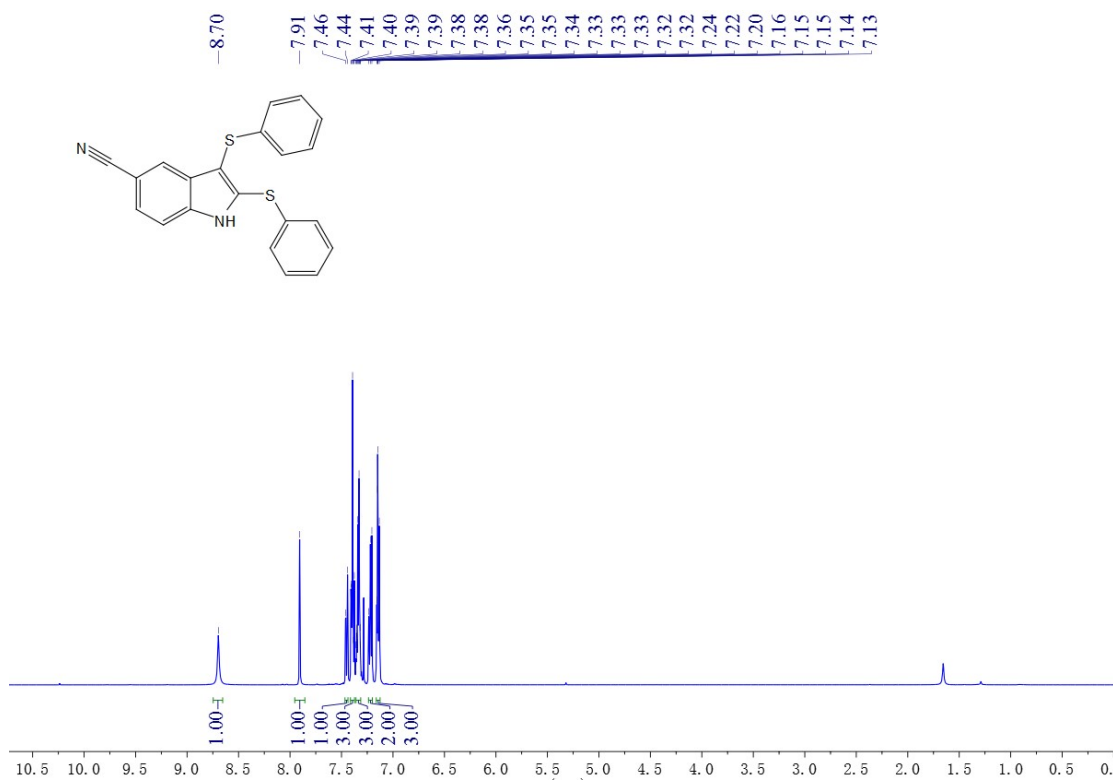

(106)  $^{13}\text{C-NMR}$  (126 MHz,  $\text{CDCl}_3$ ) spectrum of 4ja

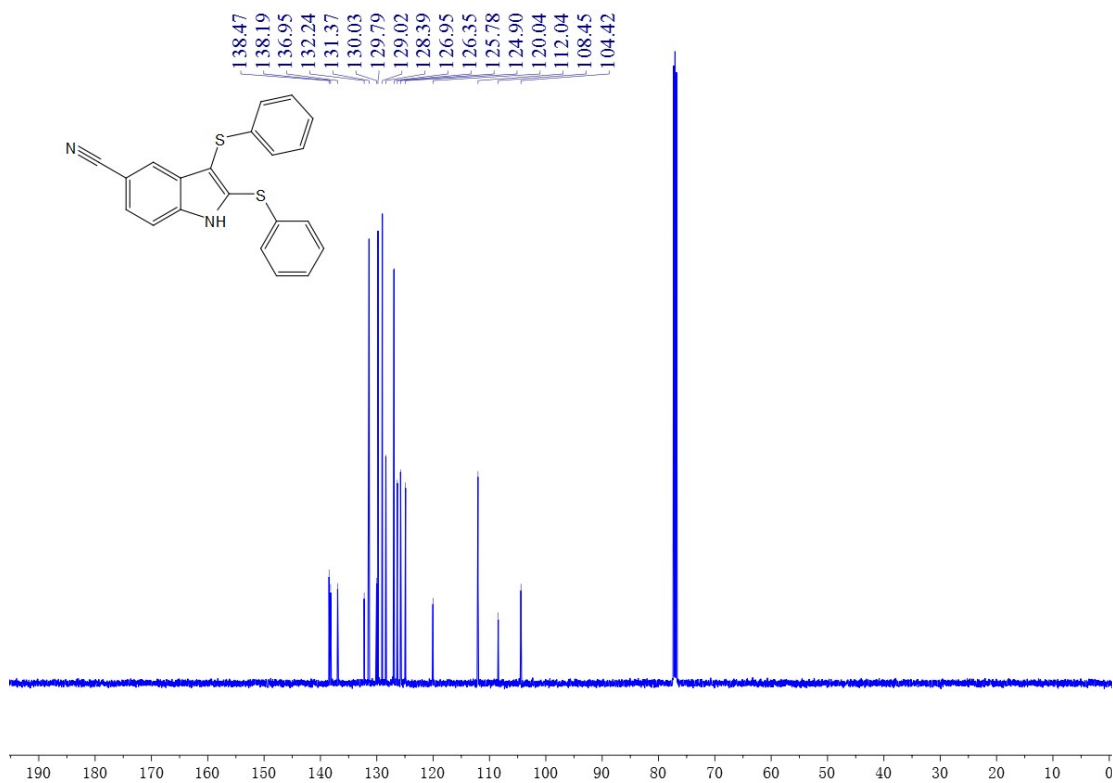

(107) <sup>1</sup>H-NMR (500 MHz, CDCl<sub>3</sub>) spectrum of 4ka

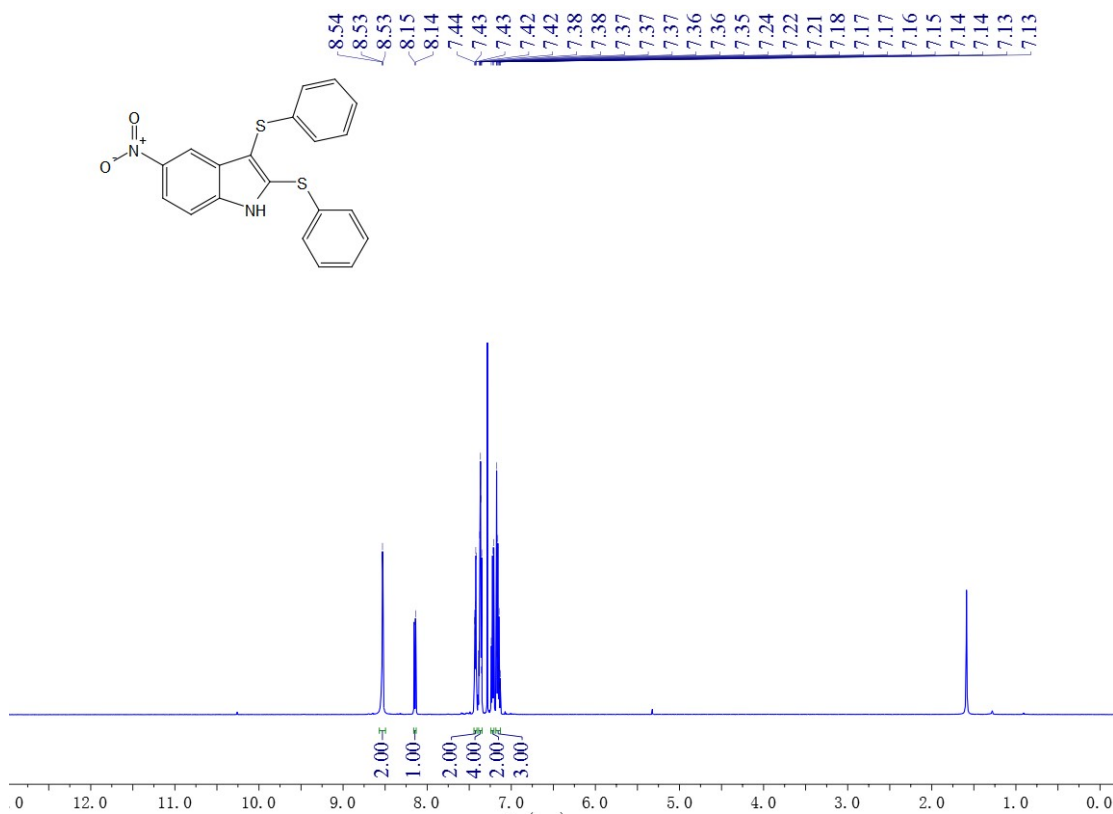

(108) <sup>13</sup>C-NMR (126 MHz, CDCl<sub>3</sub>) spectrum of 4ka

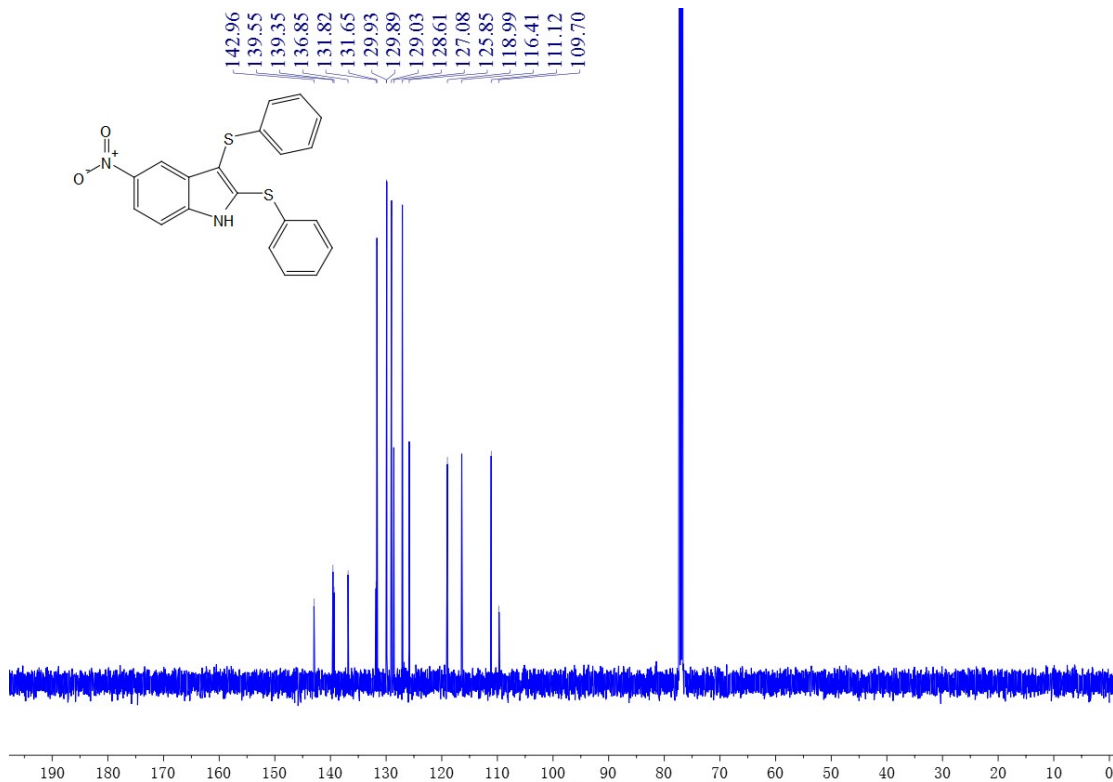

(109)  $^1\text{H-NMR}$  (500 MHz,  $\text{CDCl}_3$ ) spectrum of 4ab

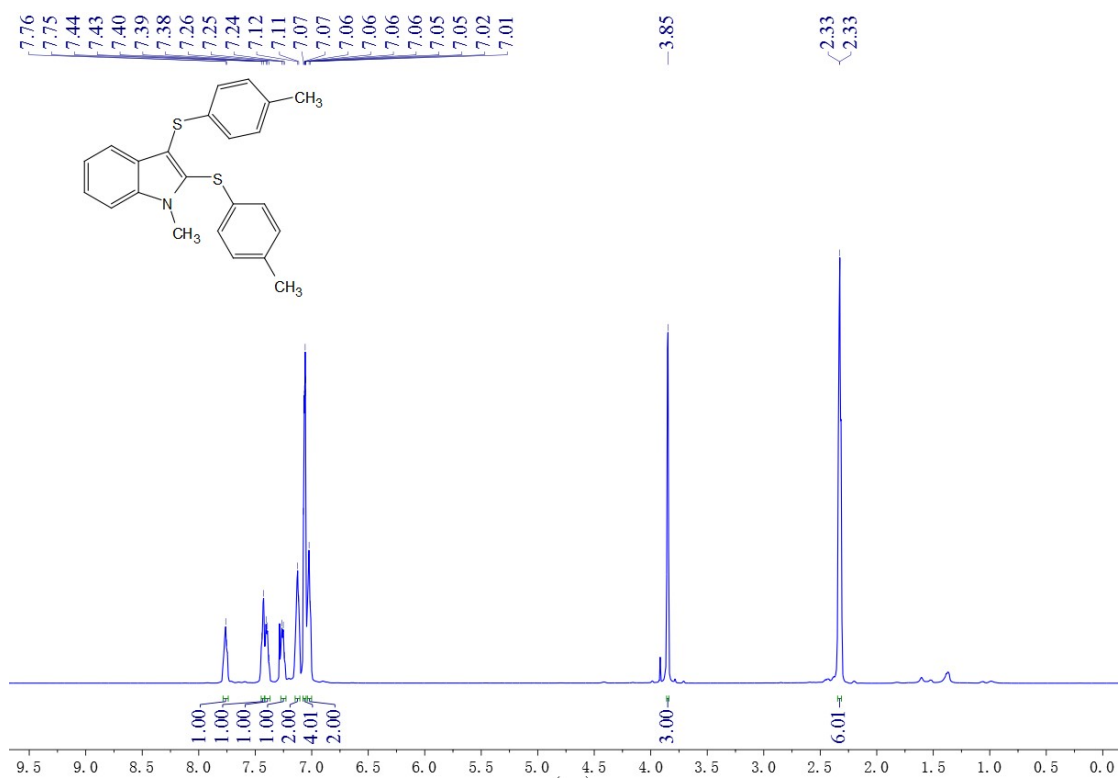

(110)  $^{13}\text{C-NMR}$  (126 MHz,  $\text{CDCl}_3$ ) spectrum of 4ab

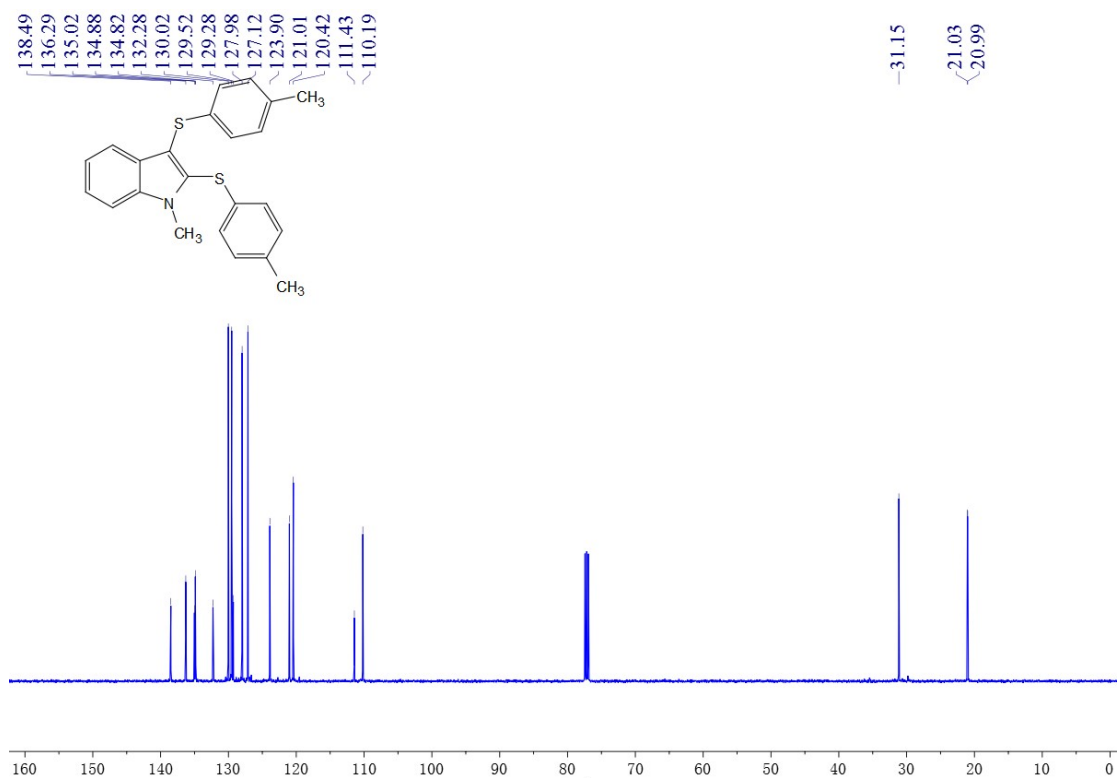

(111)  $^1\text{H-NMR}$  (500 MHz,  $\text{CDCl}_3$ ) spectrum of 4ac

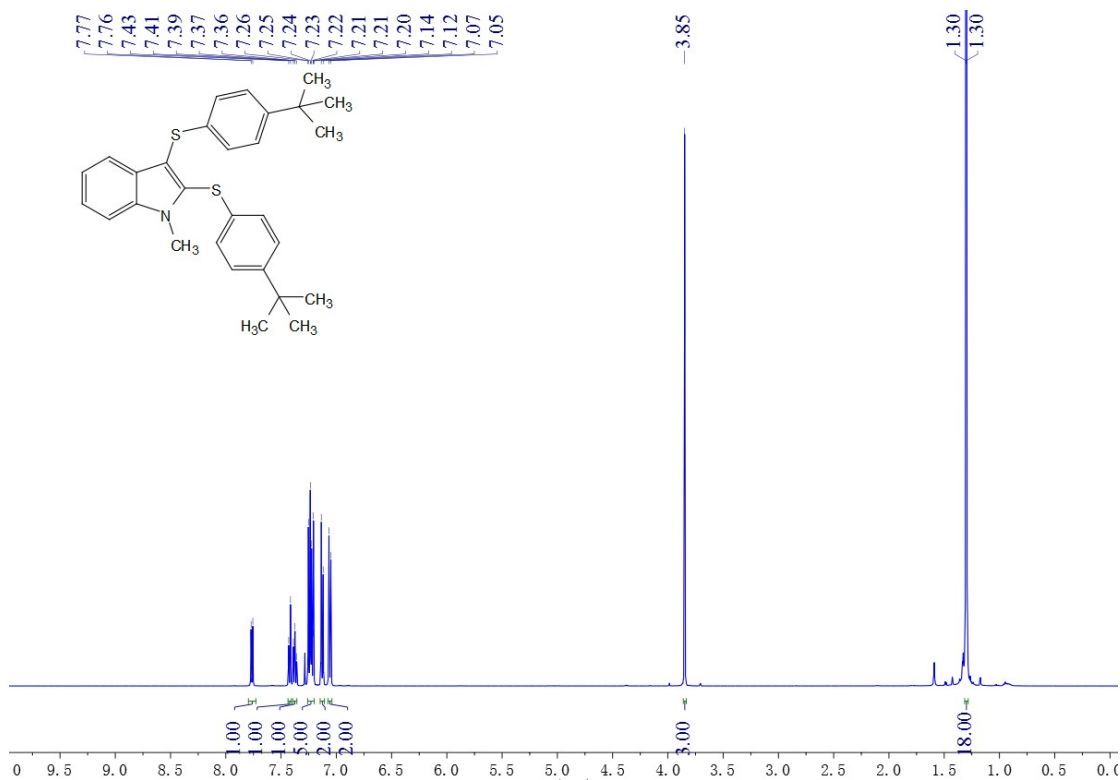

(112)  $^{13}\text{C-NMR}$  (126 MHz,  $\text{CDCl}_3$ ) spectrum of 4ac

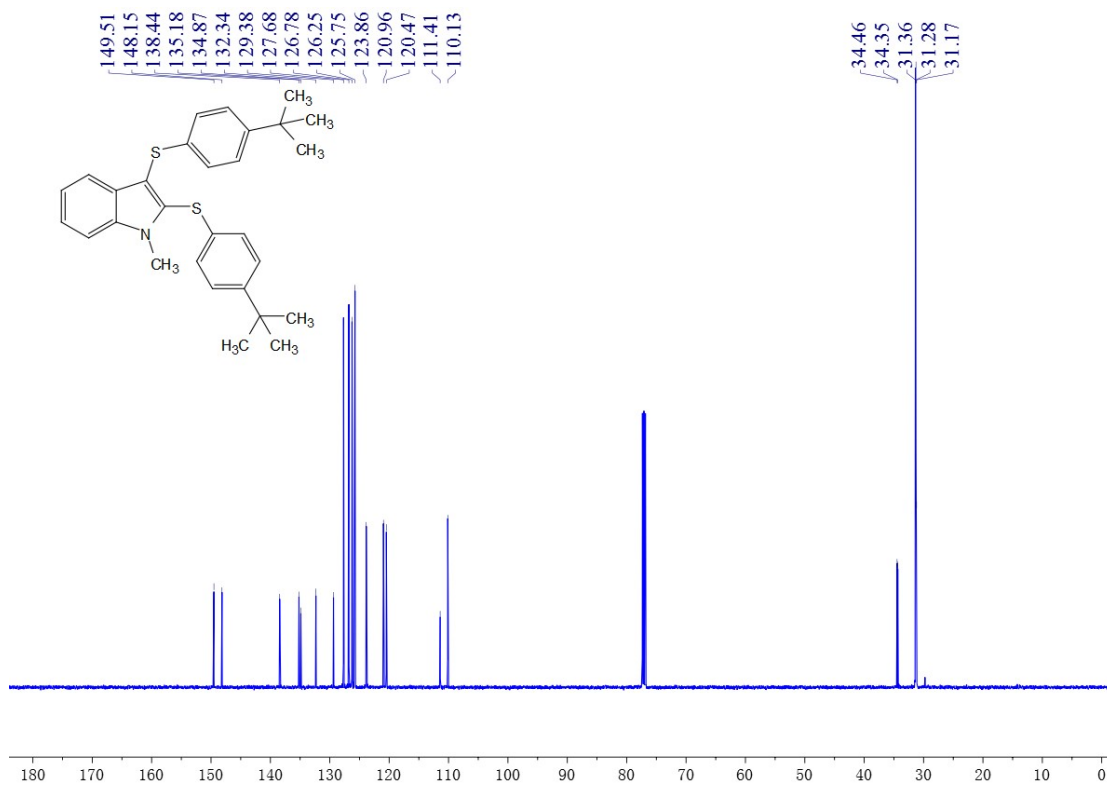

(113)  $^1\text{H-NMR}$  (500 MHz,  $\text{CDCl}_3$ ) spectrum of 4ad

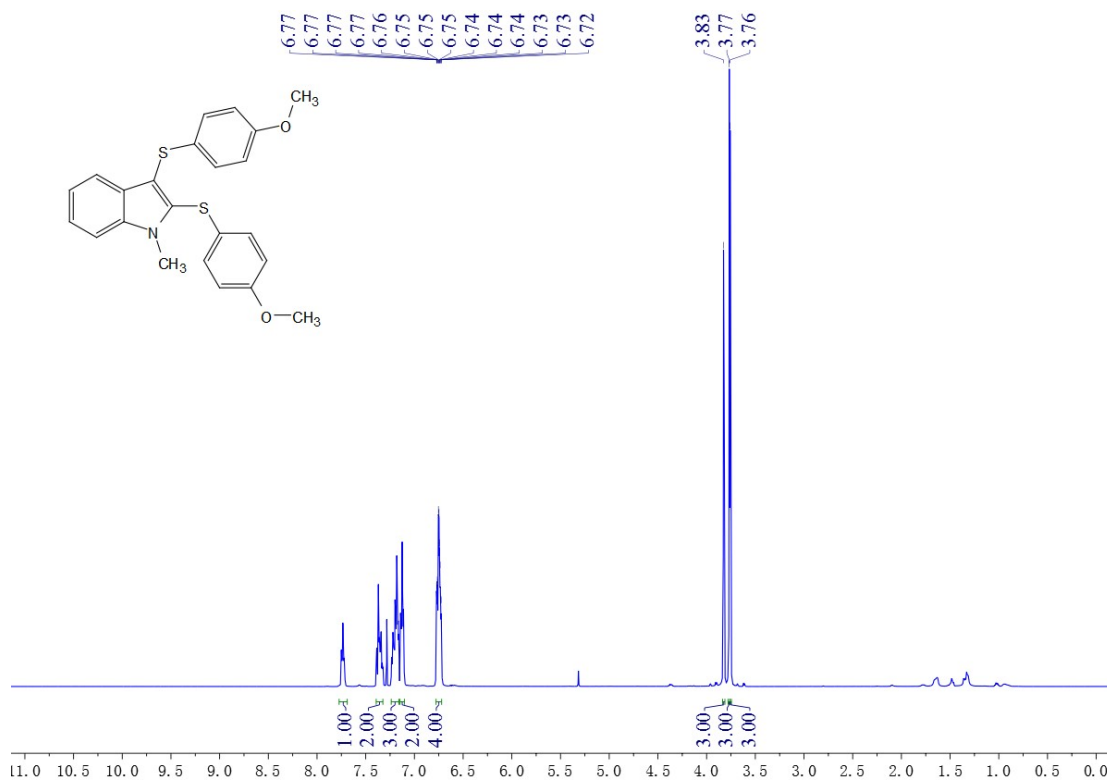

(114)  $^{13}\text{C-NMR}$  (126 MHz,  $\text{CDCl}_3$ ) spectrum of 4ad

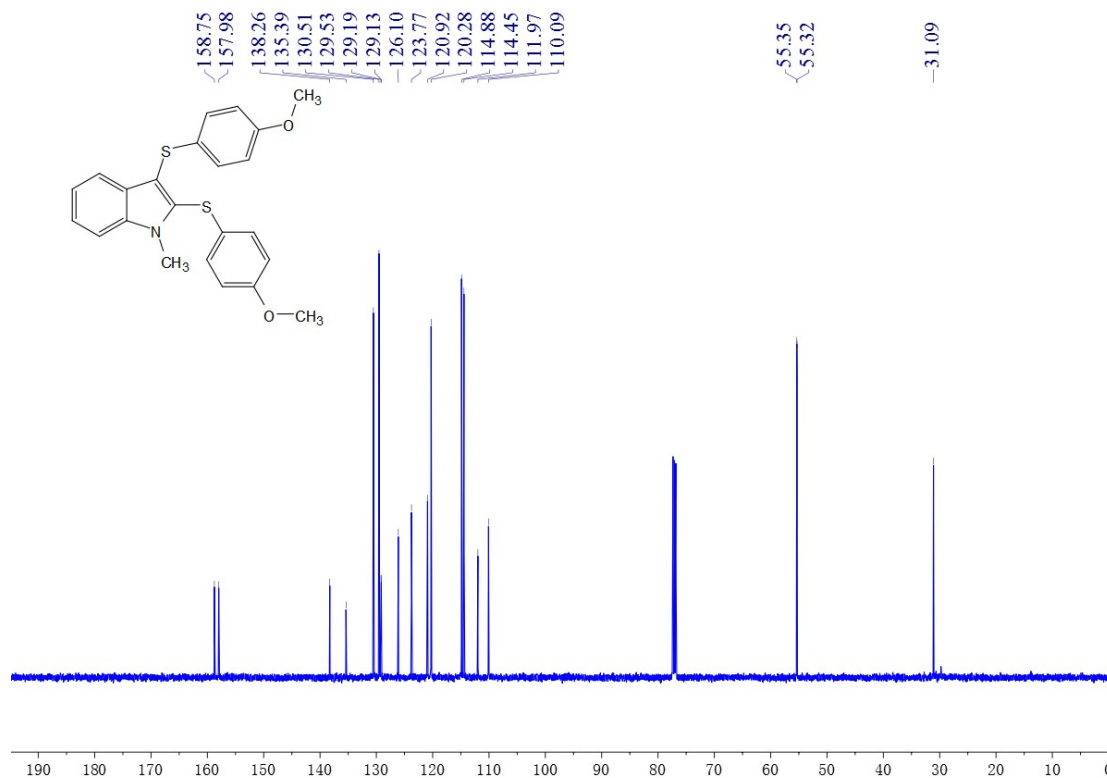

(115) <sup>1</sup>H-NMR (500 MHz, CDCl<sub>3</sub>) spectrum of 4ae

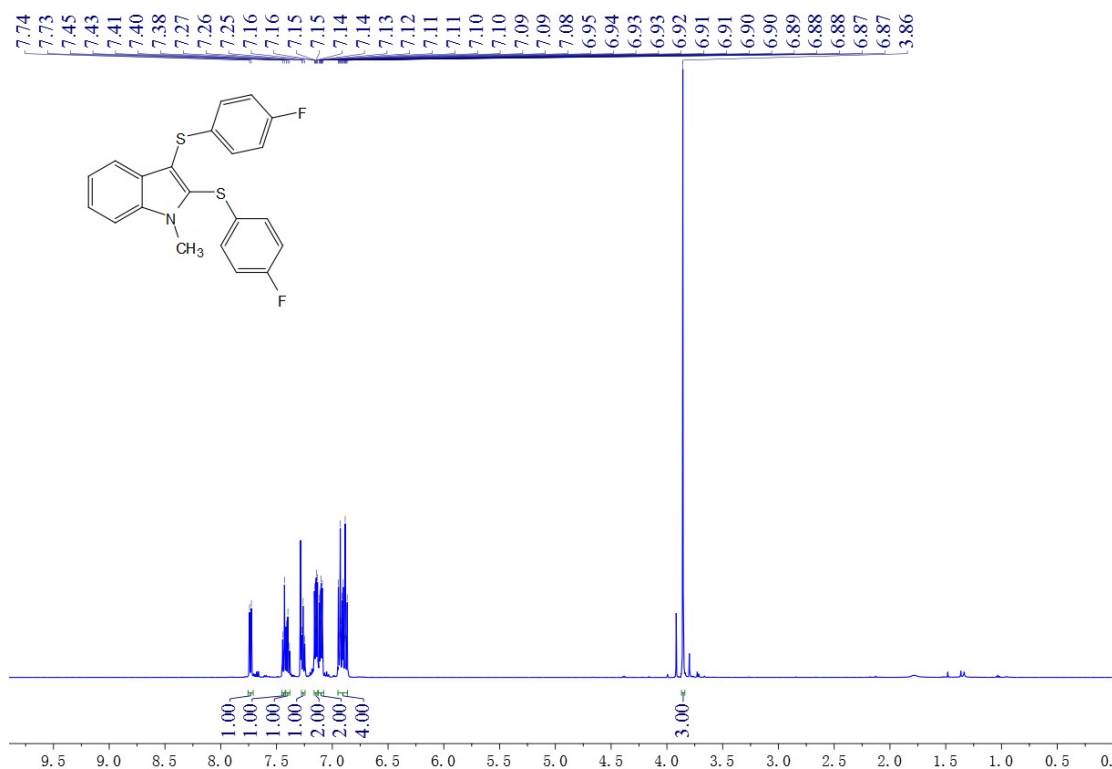

(116) <sup>13</sup>C-NMR (126 MHz, CDCl<sub>3</sub>) spectrum of 4ae

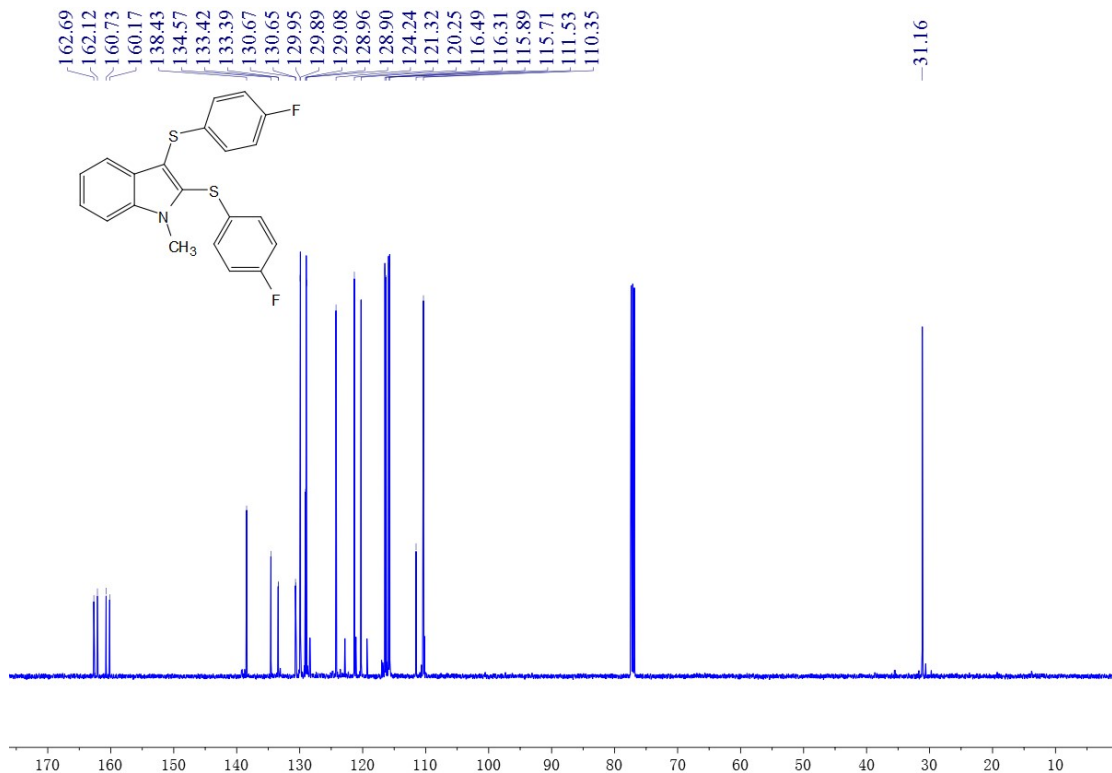

(117)  $^{19}\text{F}$ -NMR (126 MHz,  $\text{CDCl}_3$ ) spectrum of 4ae

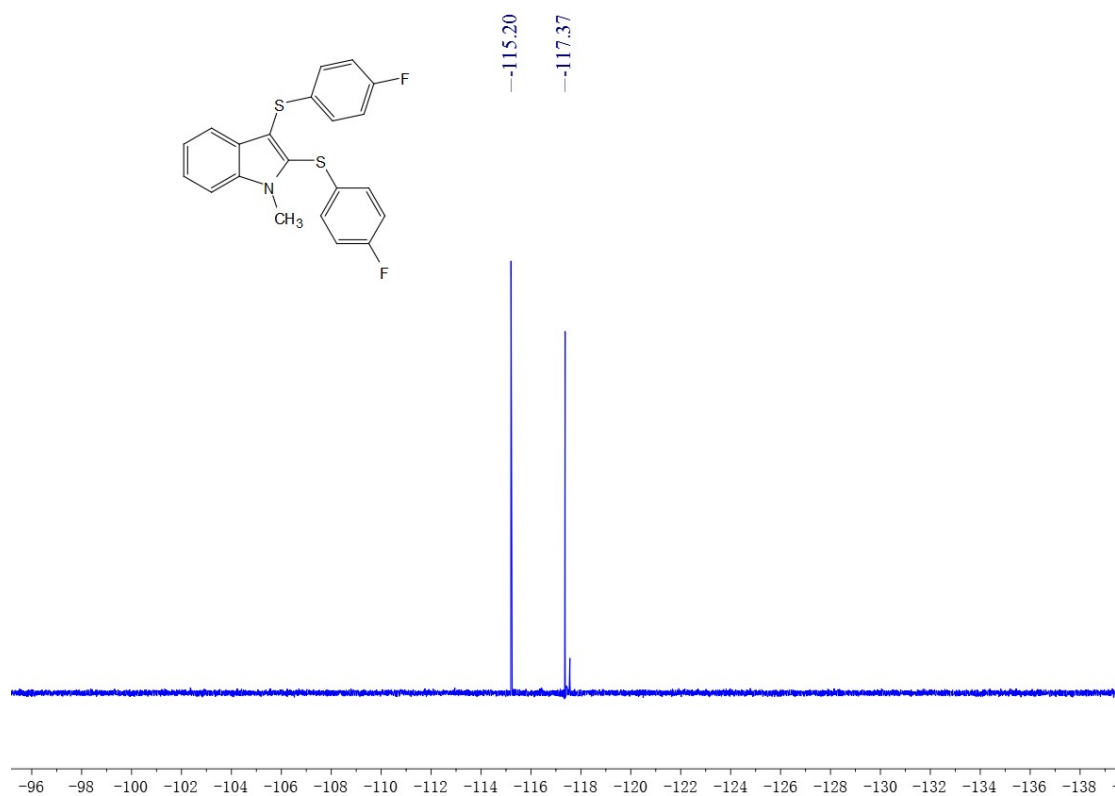

(118)  $^1\text{H}$ -NMR (500 MHz,  $\text{CDCl}_3$ ) spectrum of 4af

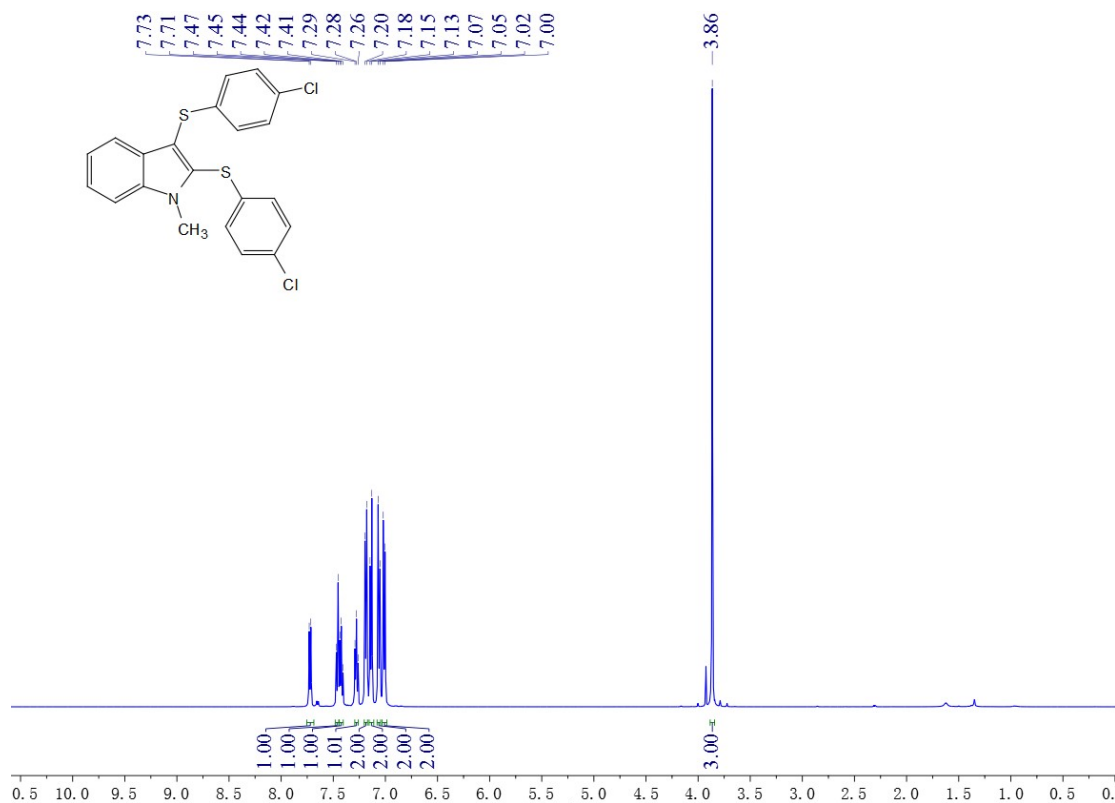

(119)  $^{13}\text{C-NMR}$  (126 MHz,  $\text{CDCl}_3$ ) spectrum of 4af

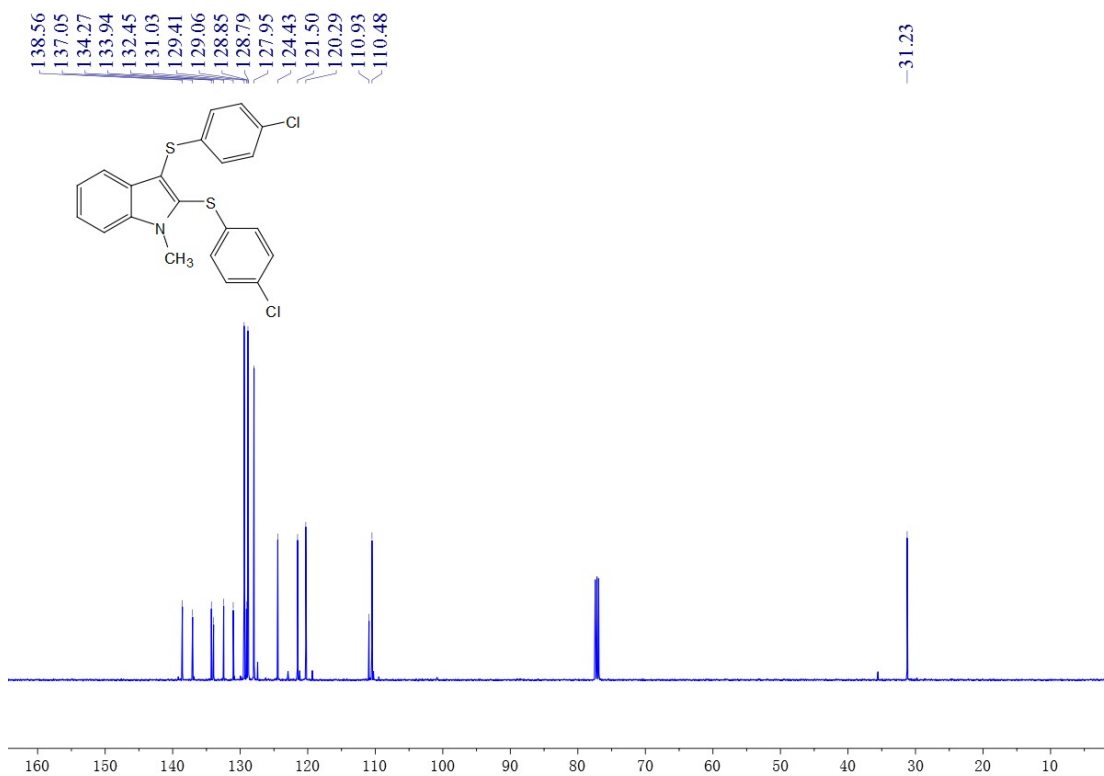

(120)  $^1\text{H-NMR}$  (500 MHz,  $\text{CDCl}_3$ ) spectrum of 4ag

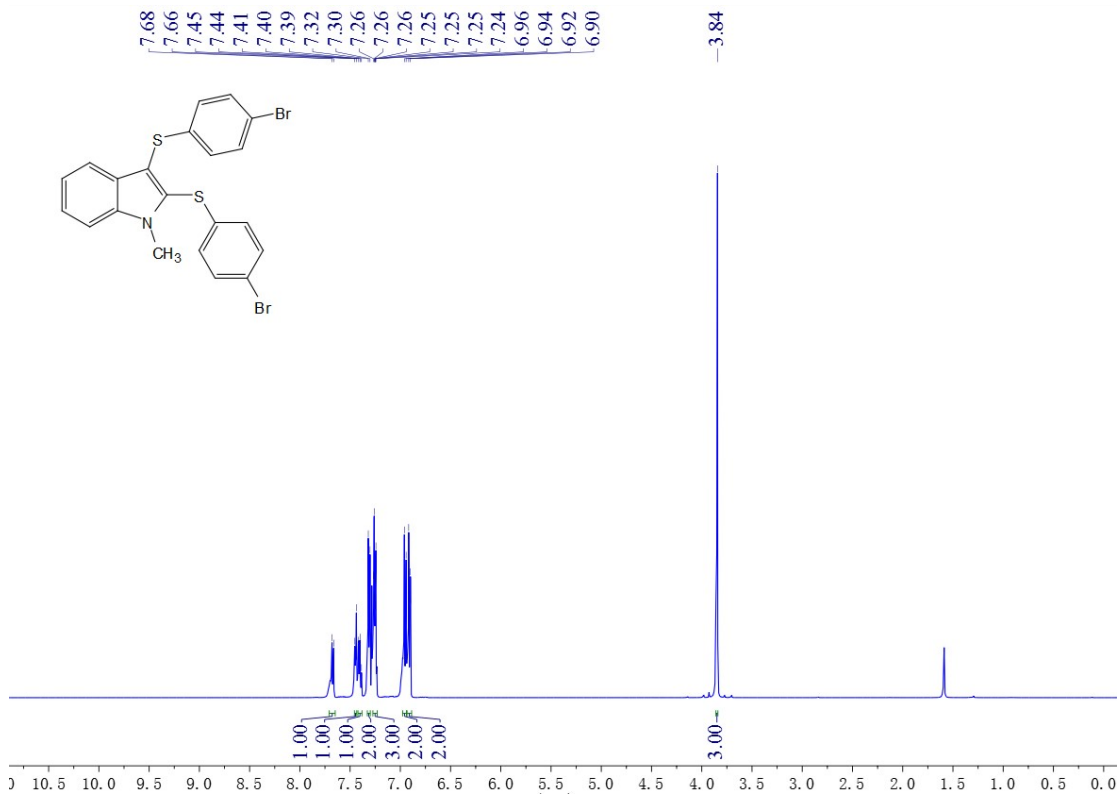



(121) <sup>13</sup>C-NMR (126 MHz, CDCl<sub>3</sub>) spectrum of 4ag

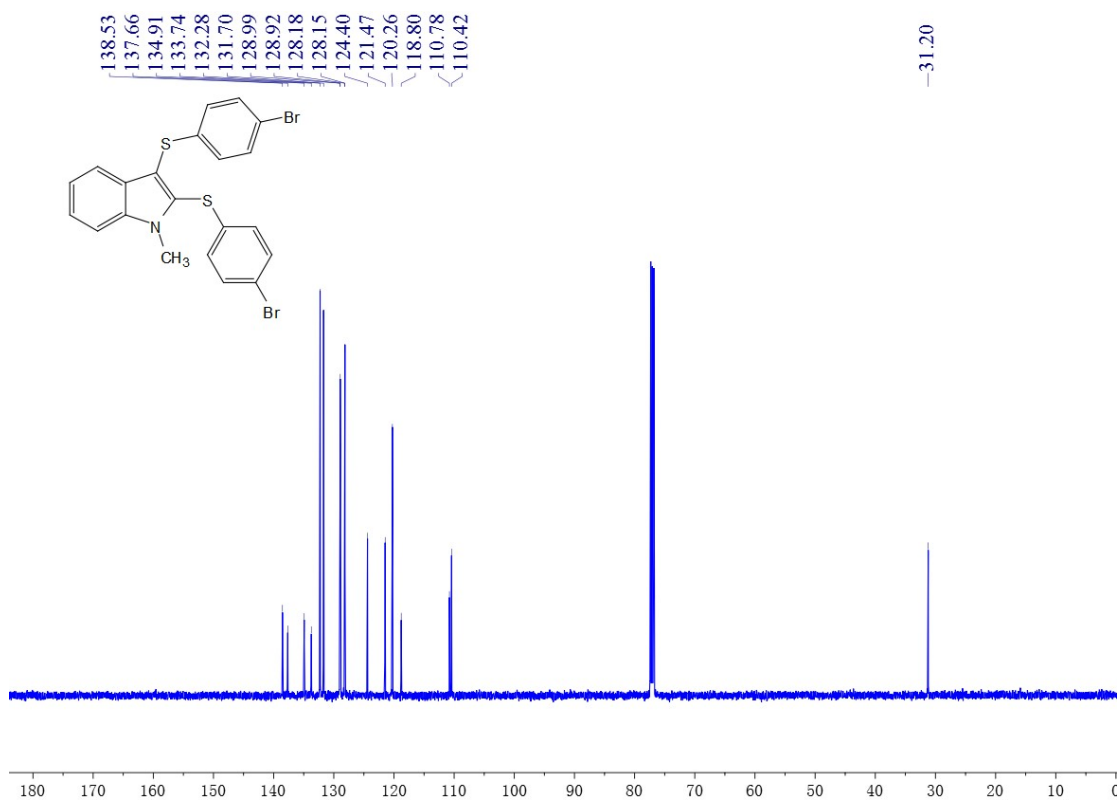

(122) <sup>1</sup>H-NMR (500 MHz, CDCl<sub>3</sub>) spectrum of 4ah

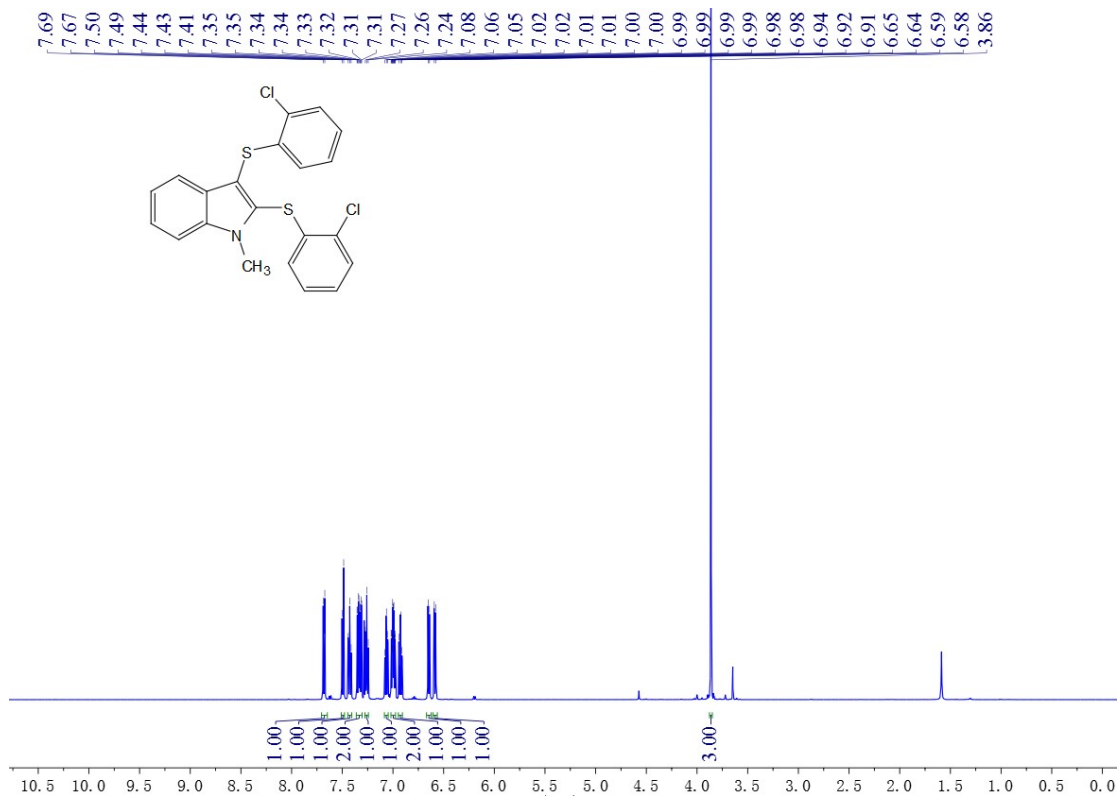

(123)  $^{13}\text{C}$ -NMR (126 MHz,  $\text{CDCl}_3$ ) spectrum of 4ah

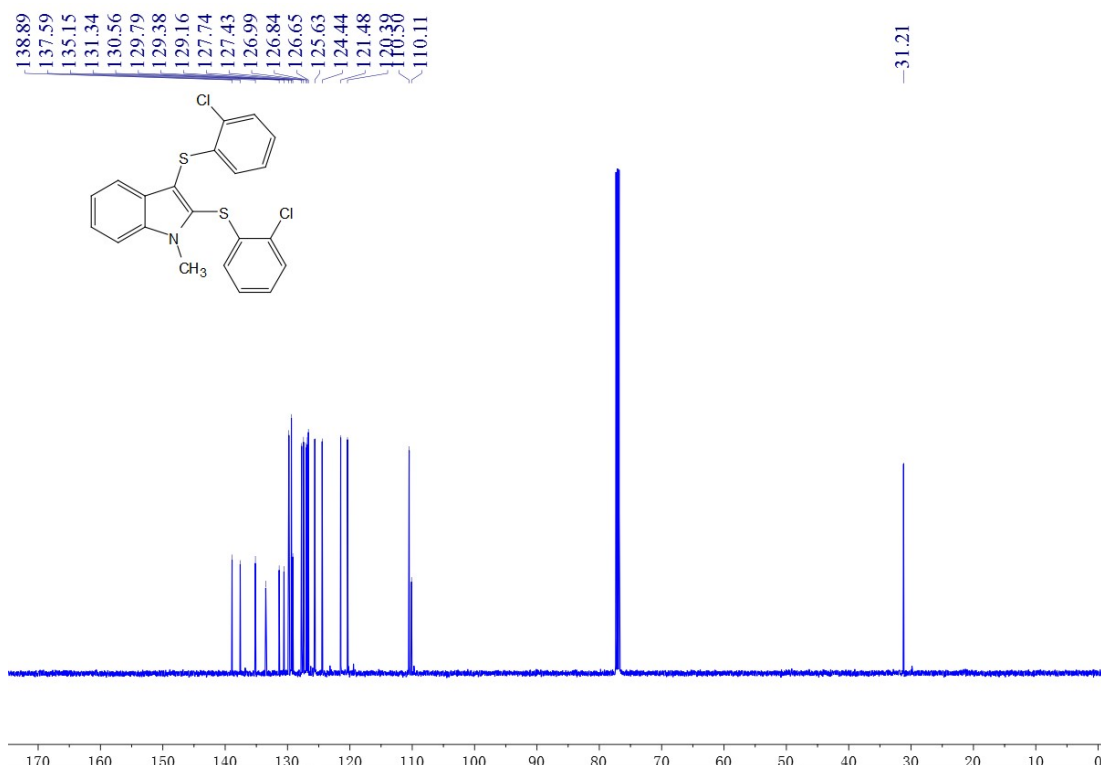

(124)  $^1\text{H}$ -NMR (400 MHz,  $\text{CDCl}_3$ ) spectrum of 4ai

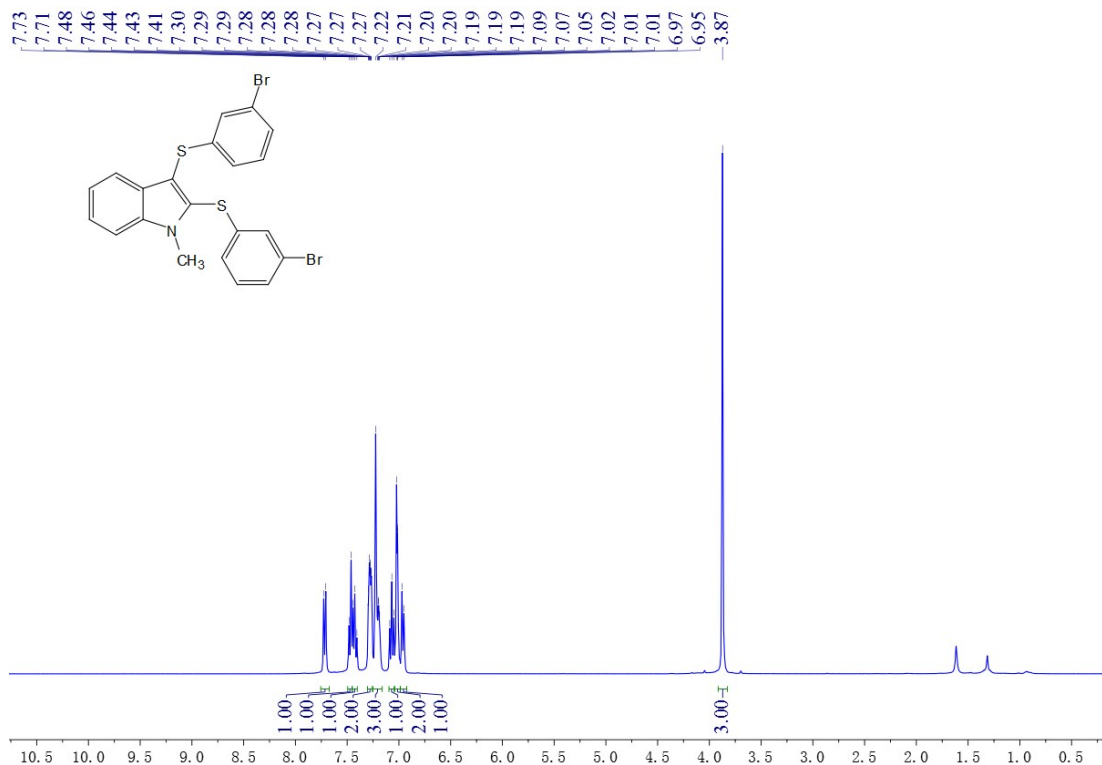

(125) <sup>13</sup>C-NMR (101 MHz, CDCl<sub>3</sub>) spectrum of 4ai

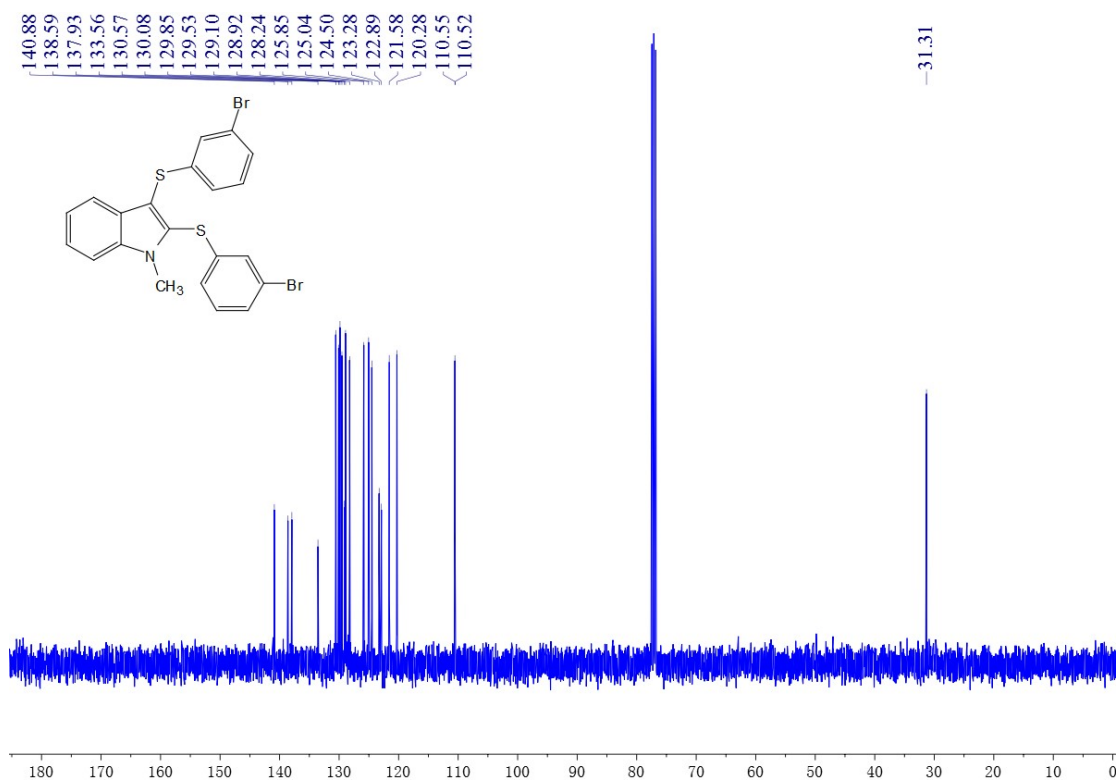

(126) <sup>1</sup>H-NMR (500 MHz, CDCl<sub>3</sub>) spectrum of 4aj

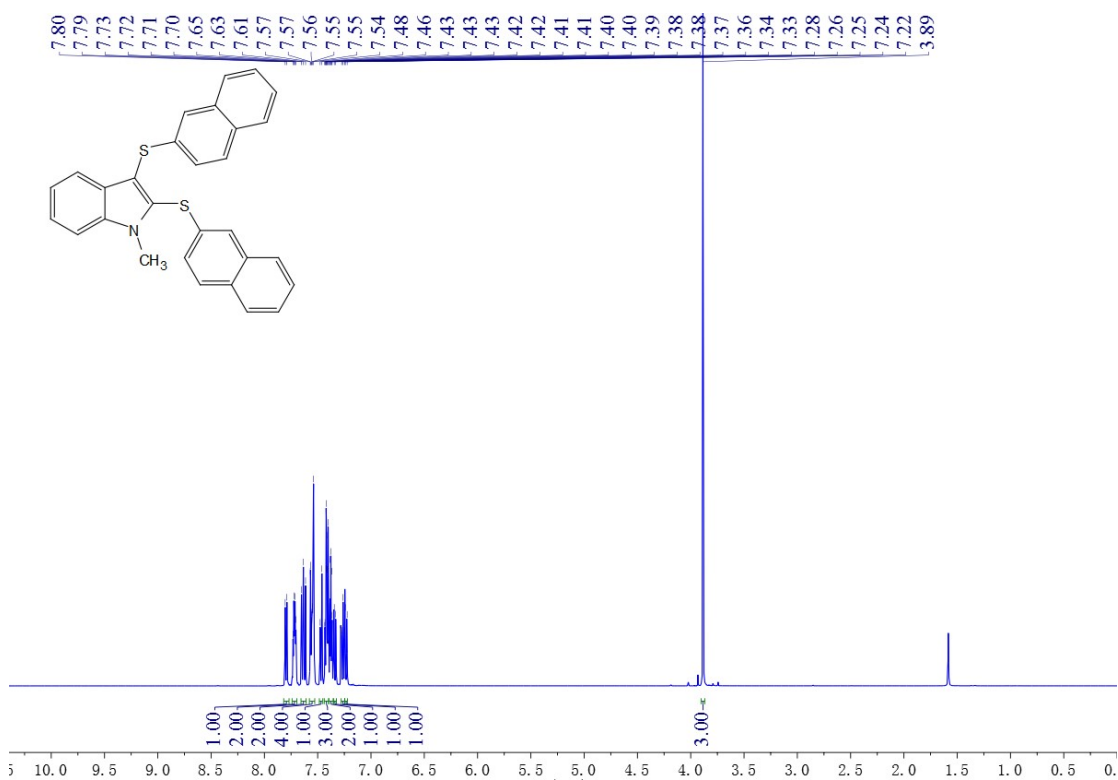

(127)  $^{13}\text{C-NMR}$  (126 MHz,  $\text{CDCl}_3$ ) spectrum of 4aj

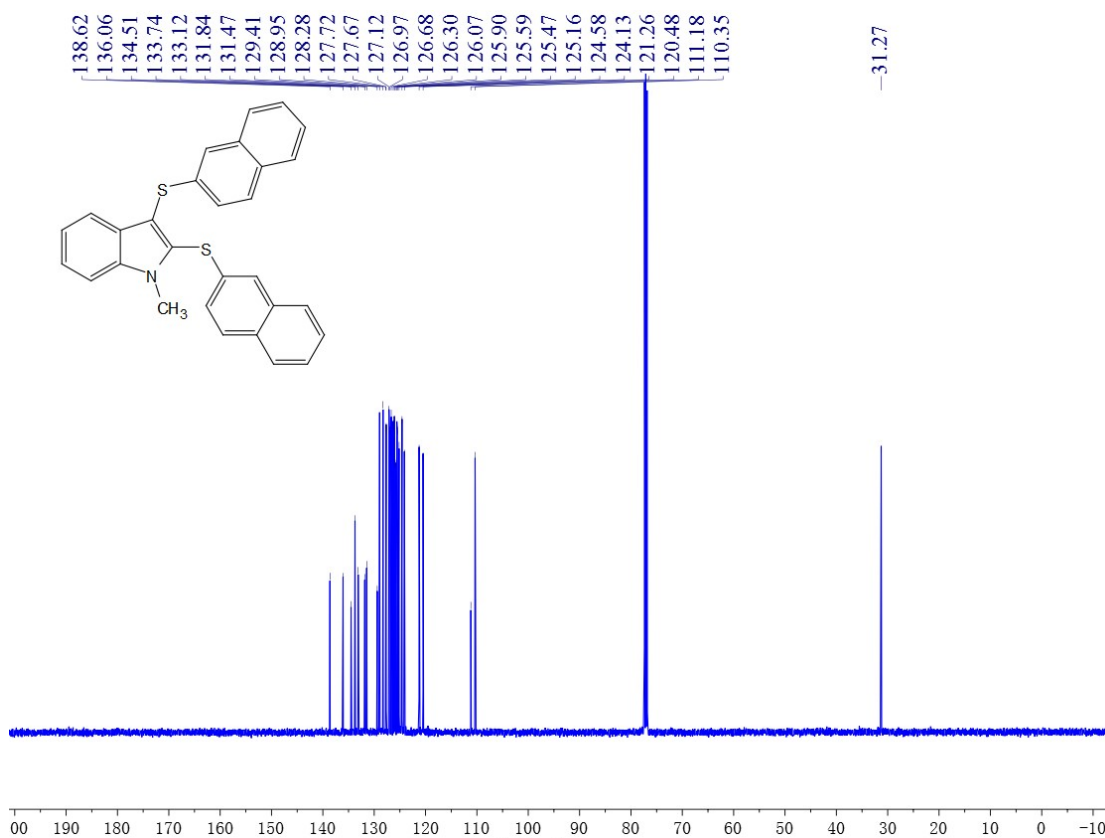

(128)  $^1\text{H-NMR}$  (500 MHz,  $\text{CDCl}_3$ ) spectrum of 4ak

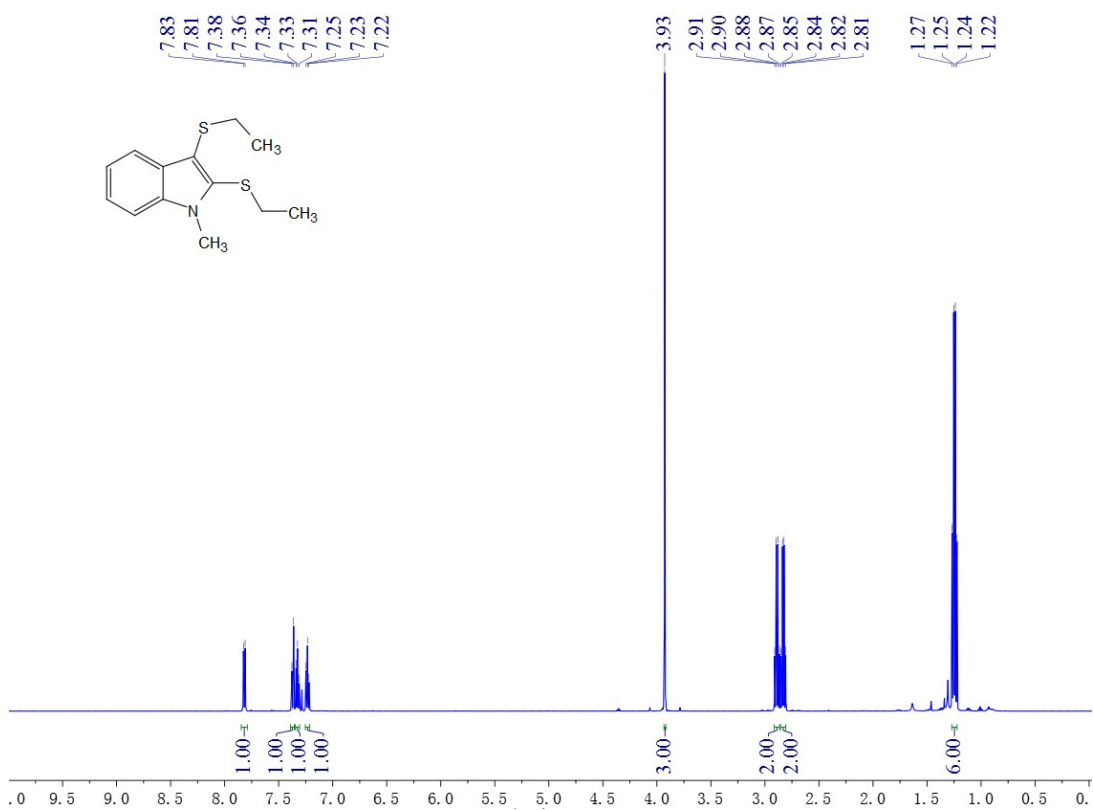

(129)  $^{13}\text{C-NMR}$  (126 MHz,  $\text{CDCl}_3$ ) spectrum of 4ak

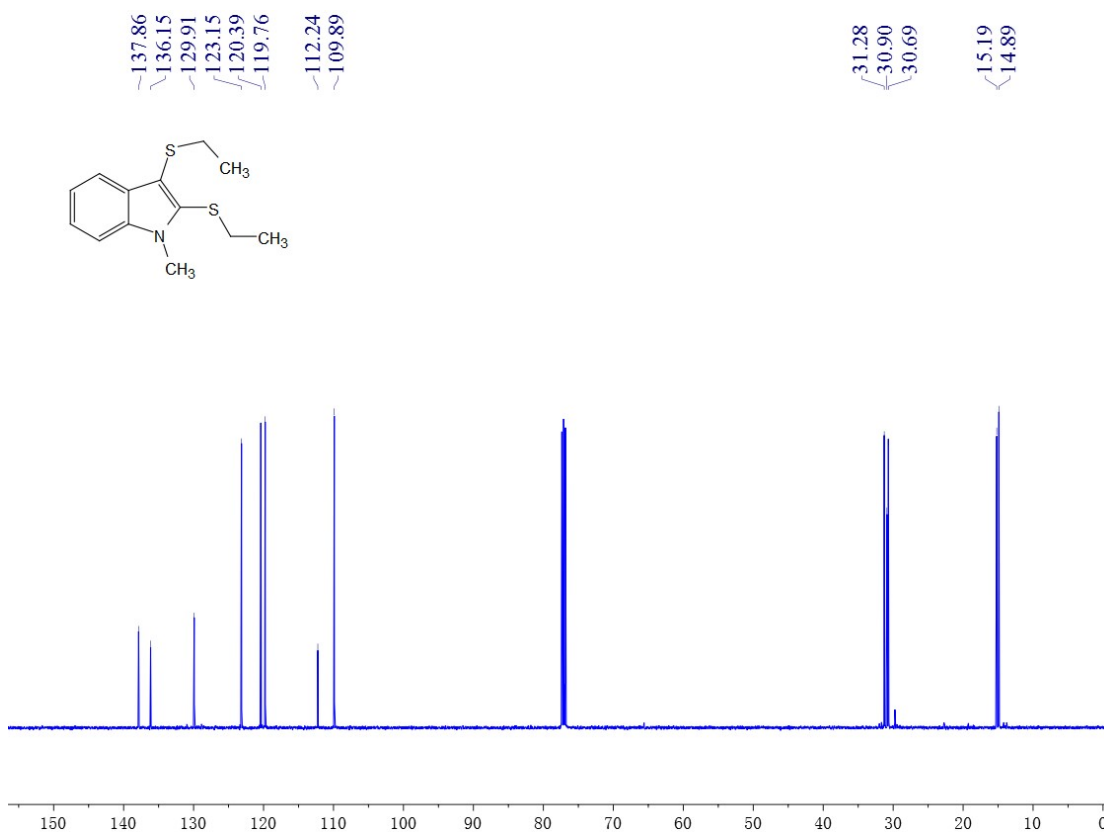

(130)  $^1\text{H-NMR}$  (500 MHz,  $\text{CDCl}_3$ ) spectrum of 4al

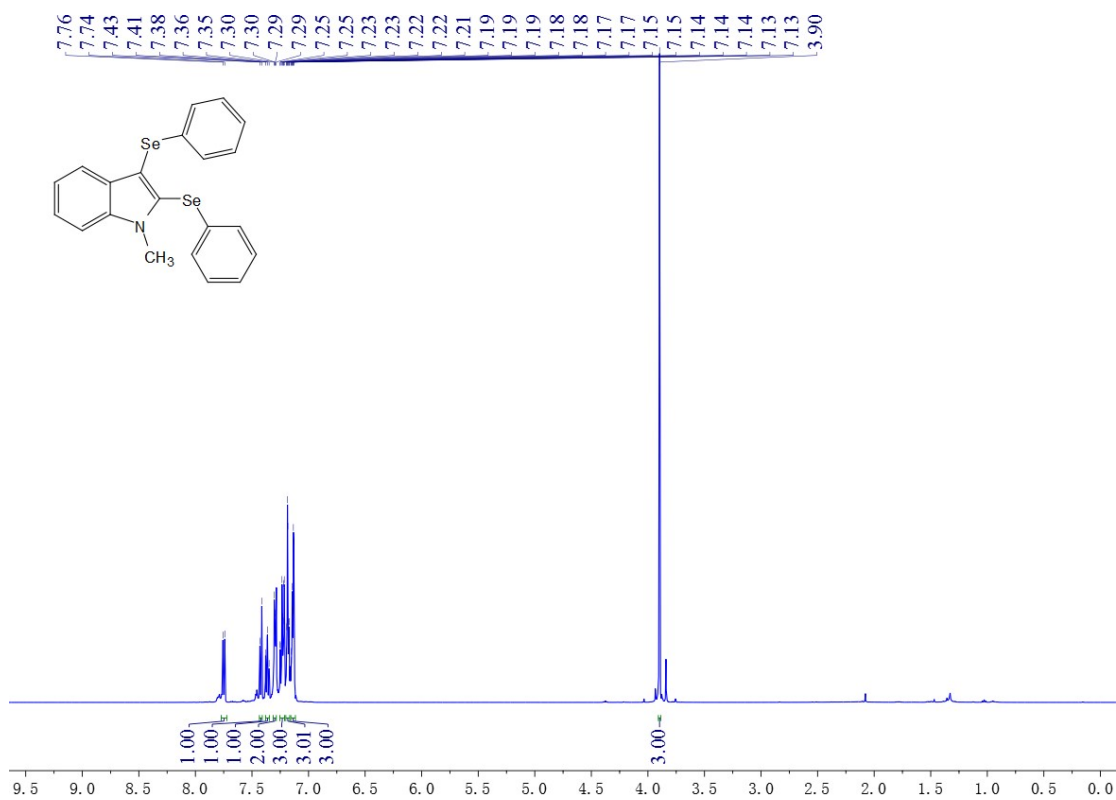

(131)  $^{13}\text{C}$ -NMR (126 MHz,  $\text{CDCl}_3$ ) spectrum of 4aI

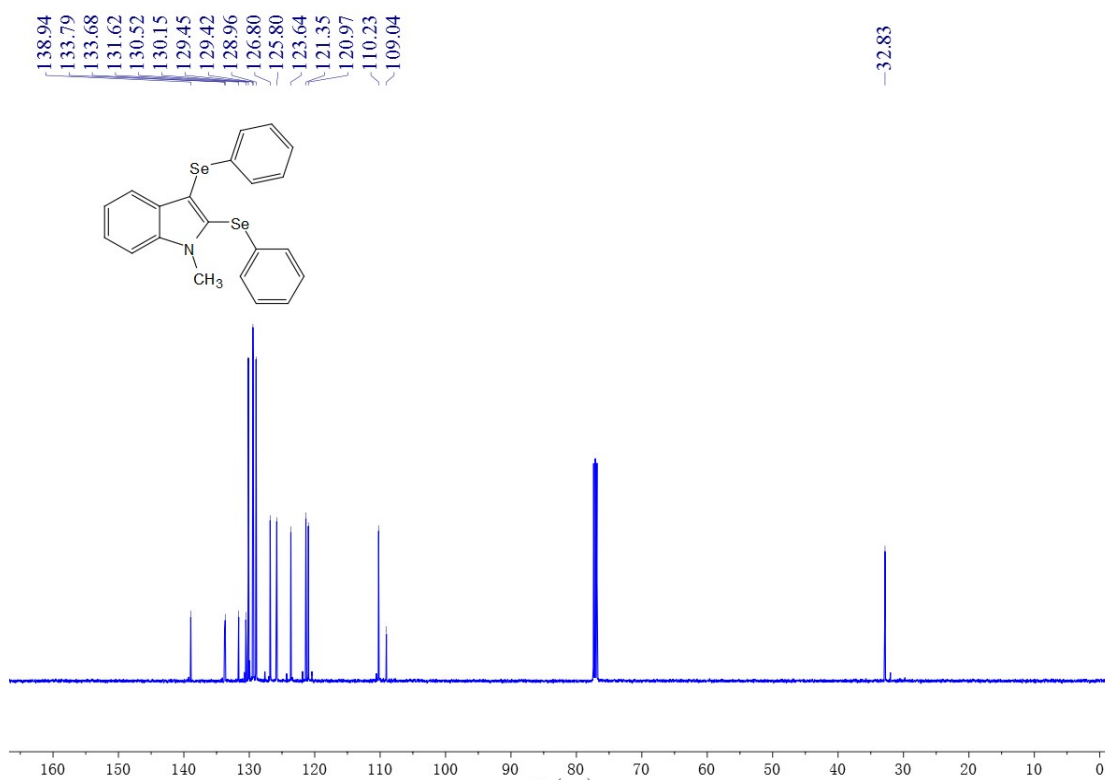

(132)  $^1\text{H}$ -NMR (600 MHz,  $\text{CDCl}_3$ ) spectrum of 6

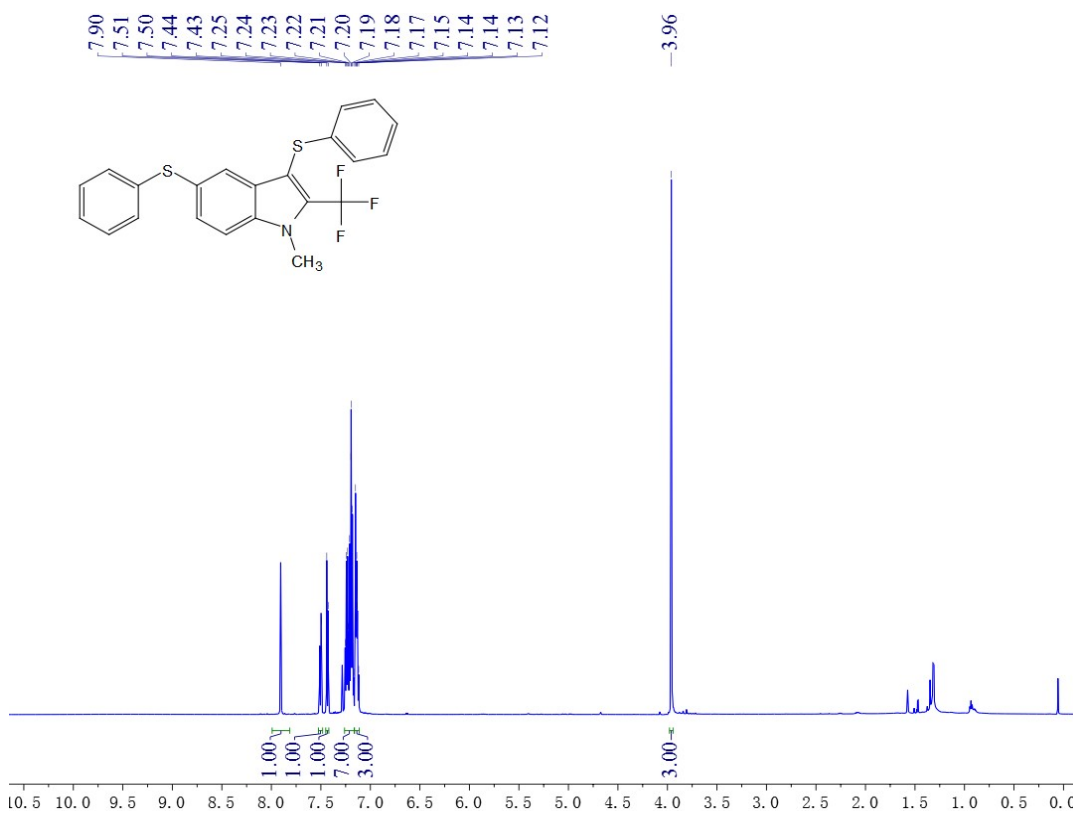

(133)  $^{13}\text{C}$ -NMR (151 MHz,  $\text{CDCl}_3$ ) spectrum of 6

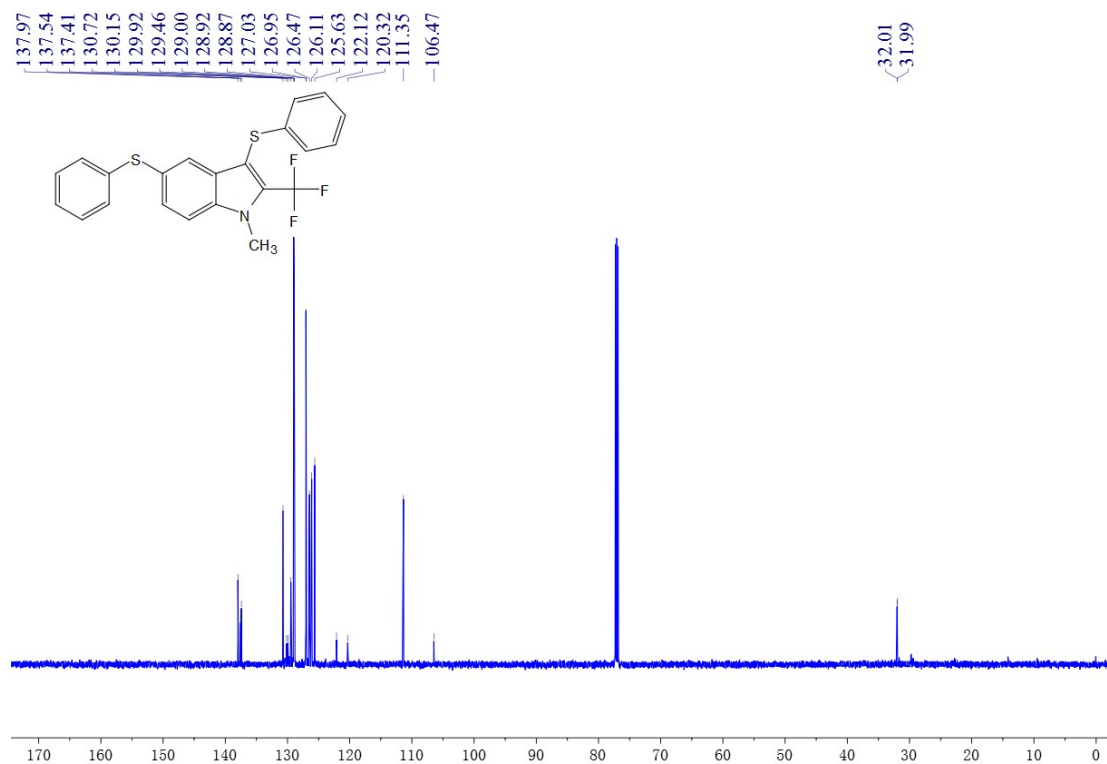

(134)  $^{19}\text{F}$ -NMR (565 MHz,  $\text{CDCl}_3$ ) spectrum of 6

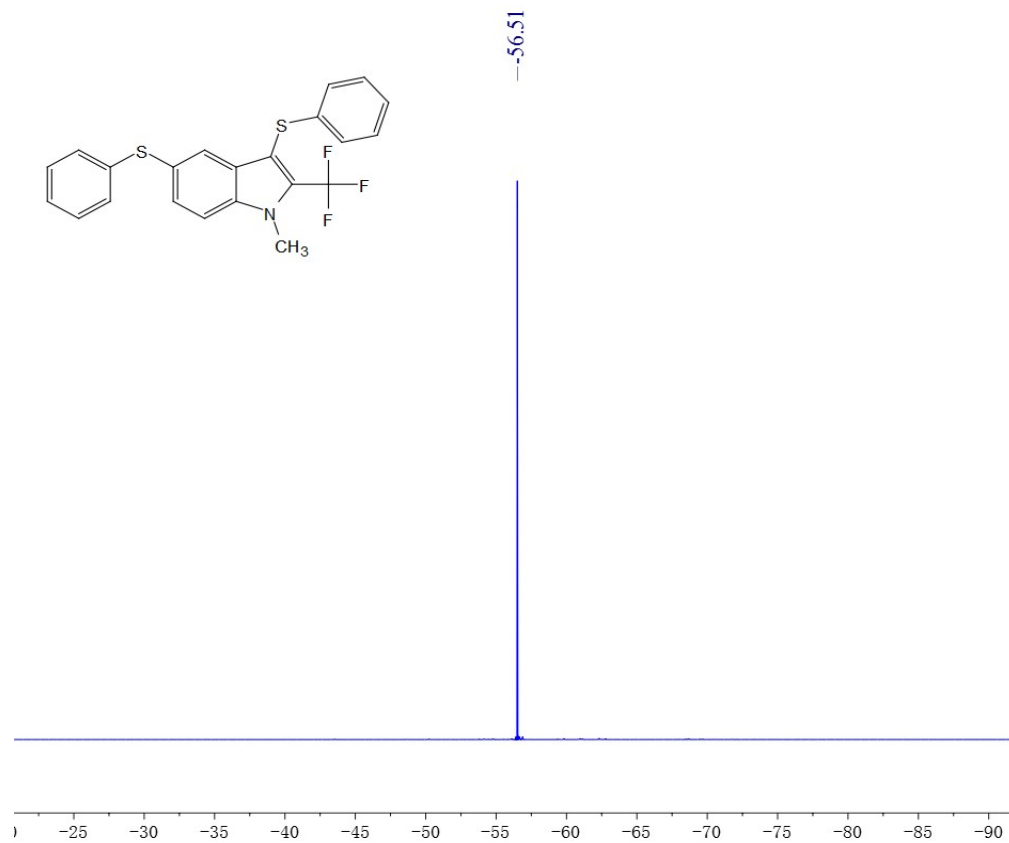

(135)  $^1\text{H-NMR}$  (600 MHz,  $\text{CDCl}_3$ ) spectrum of 7

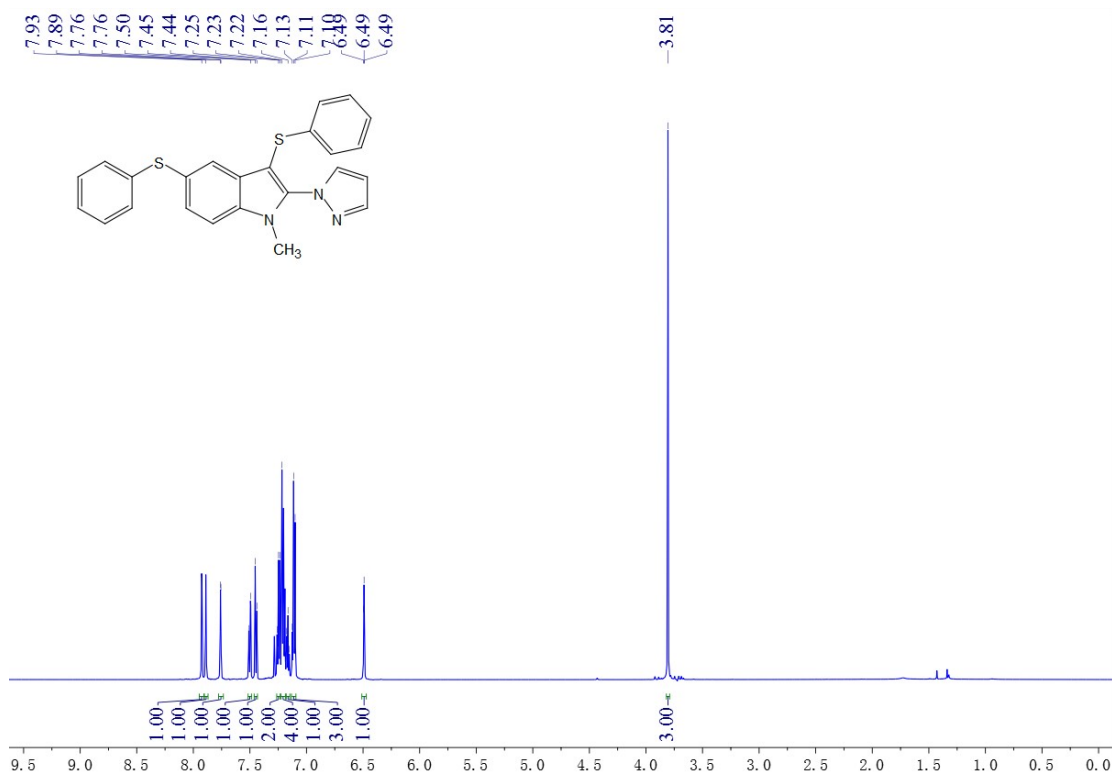

(136)  $^{13}\text{C-NMR}$  (151 MHz,  $\text{CDCl}_3$ ) spectrum of 7

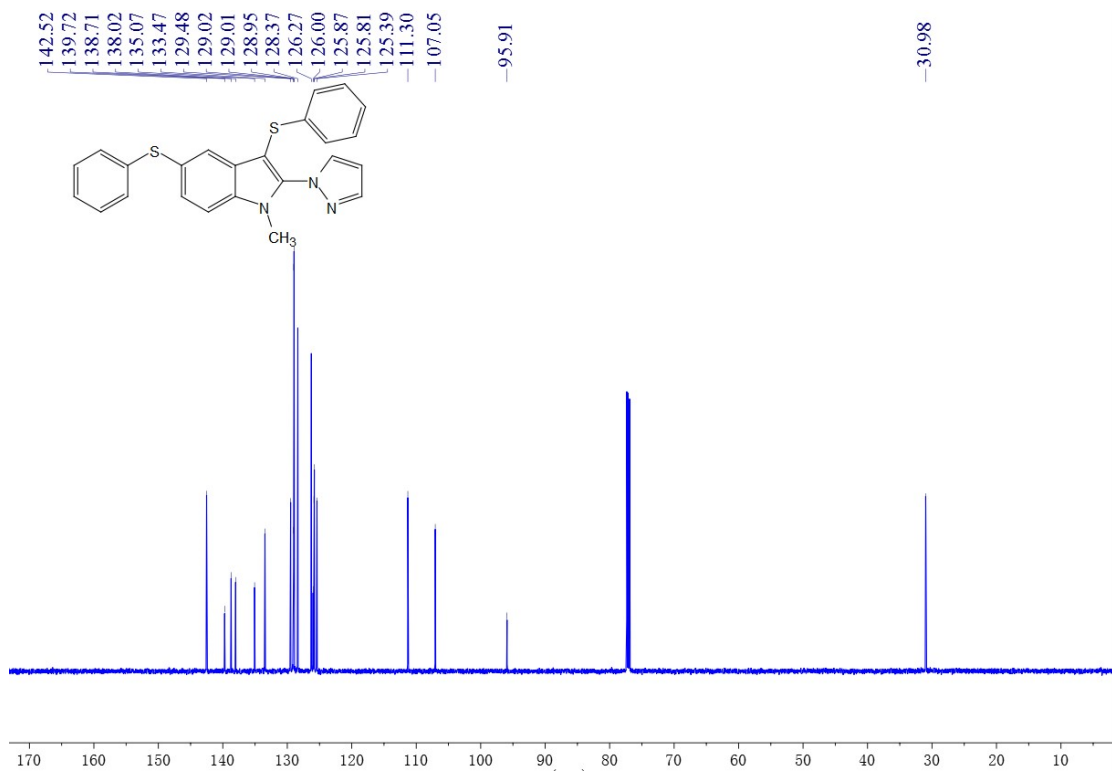



(137) <sup>1</sup>H-NMR (600 MHz, CDCl<sub>3</sub>) spectrum of 8

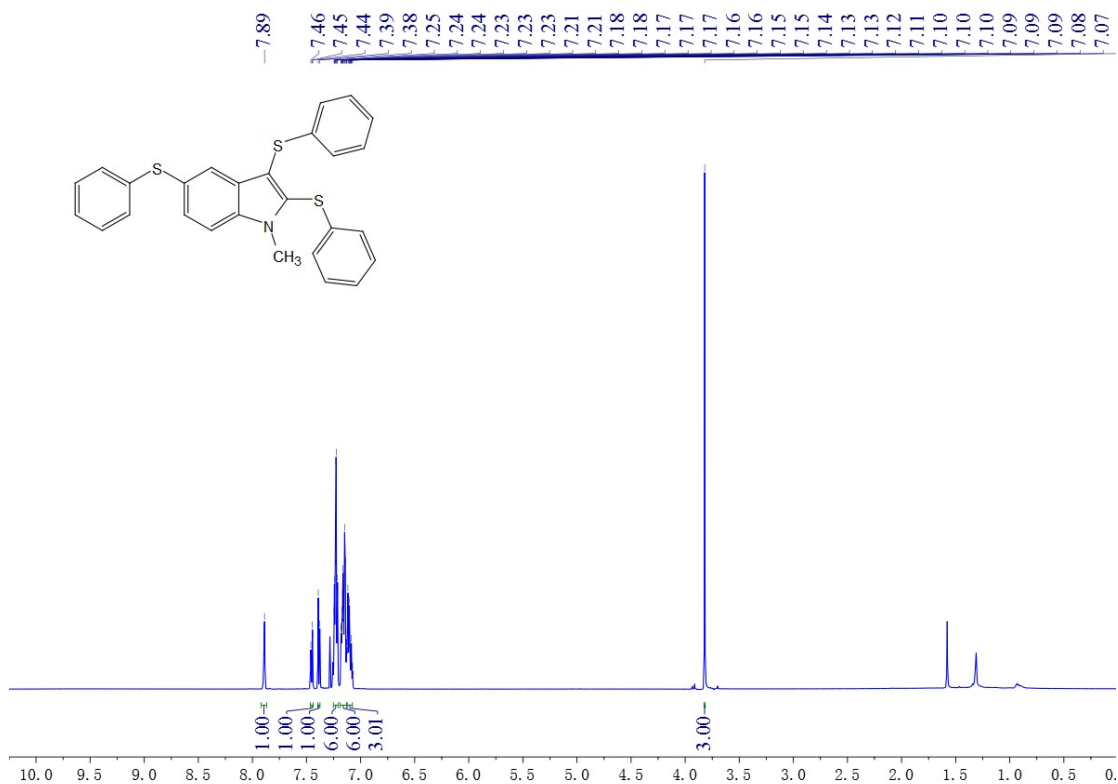

(138) <sup>13</sup>C-NMR (151 MHz, CDCl<sub>3</sub>) spectrum of 8

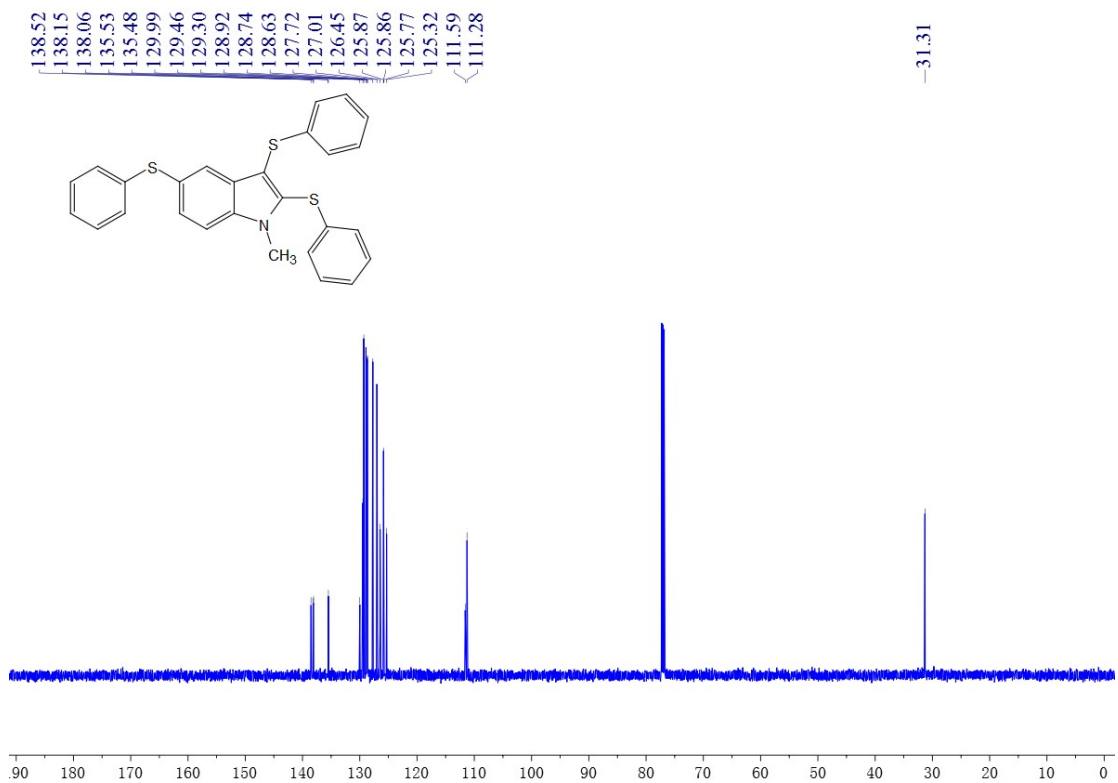

(139) <sup>1</sup>H-NMR (600 MHz, CDCl<sub>3</sub>) spectrum of 9

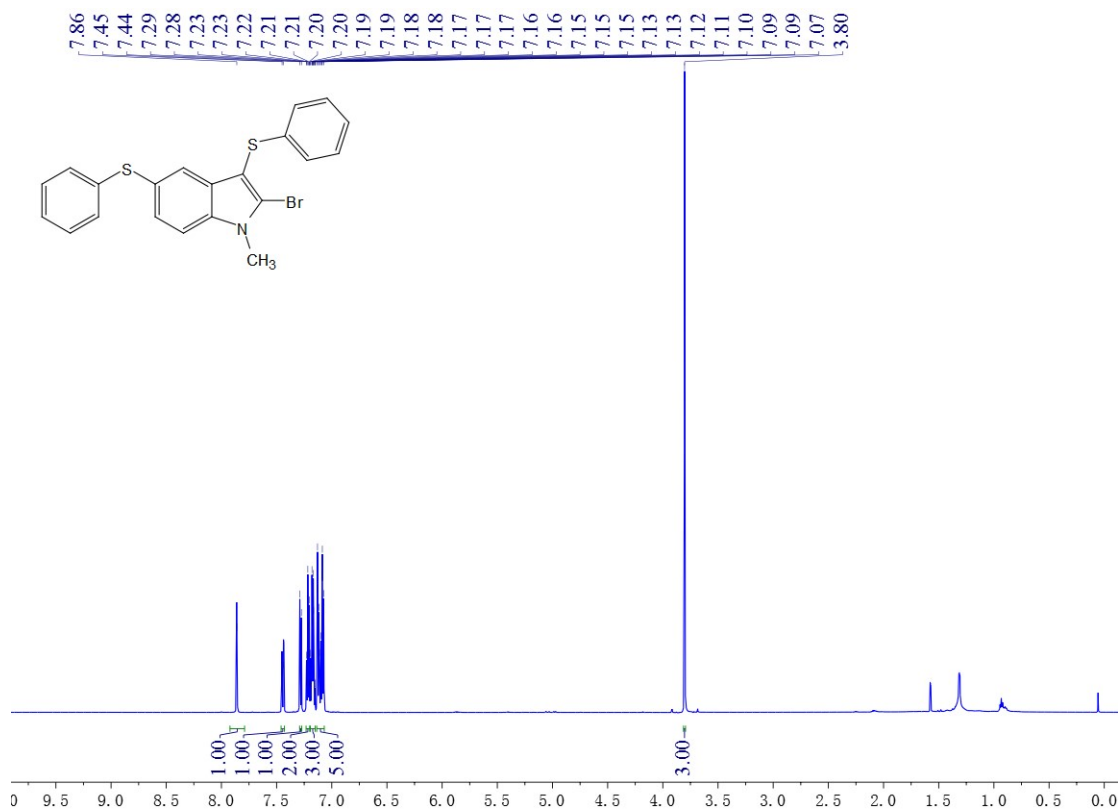

(140) <sup>13</sup>C-NMR (151 MHz, CDCl<sub>3</sub>) spectrum of 9

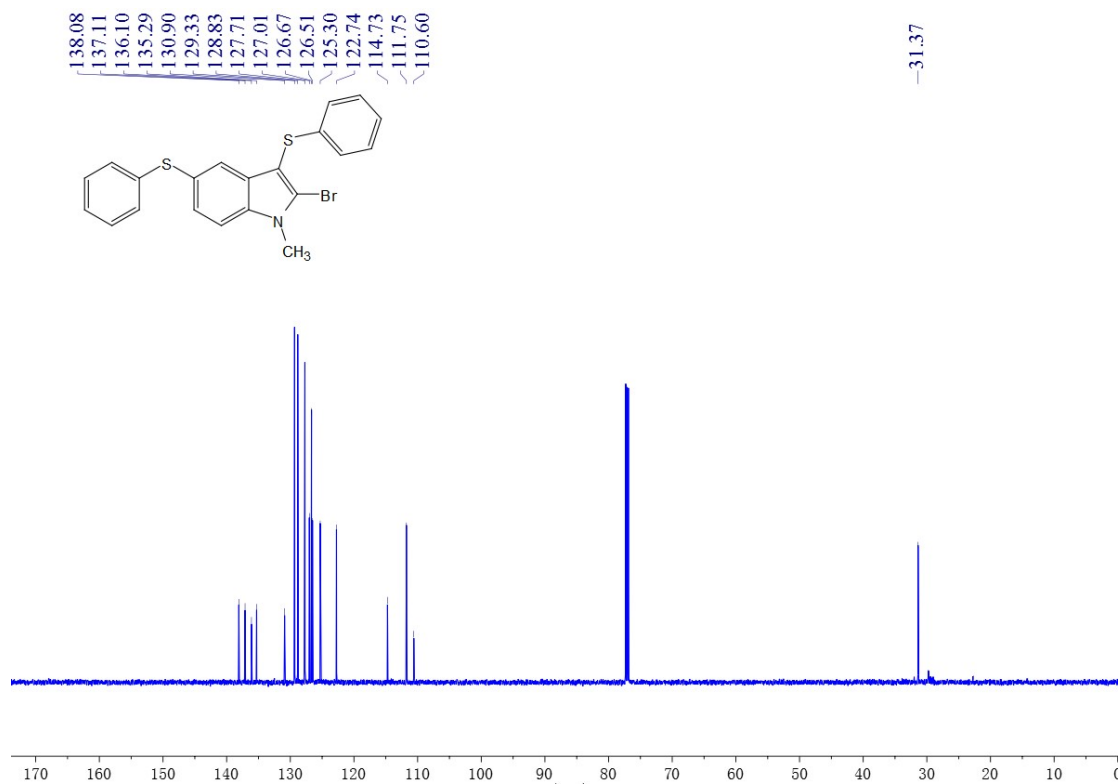

Supplement: d3qo01492d1.pdf [file d3qo01492d1.pdf]
